# Supplementary material for: Genetic and Epigenetic Profiling Reveals EZH2-mediated Down Regulation of OCT-4 Involves NR2F2 during Cardiac Differentiation of Human Embryonic Stem Cells
Source: PubMed Central journal article supplement (PMC5638931; doi:10.1038/s41598-017-13442-9), 2017-10-12
Supplement: 41598_2017_13442_MOESM1_ESM.pdf [file 41598_2017_13442_MOESM1_ESM.pdf]

**Genetic and Epigenetic Profiling Reveals EZH2-mediated Down Regulation of OCT-4 Involves NR2F2 during Cardiac Differentiation of Human Embryonic Stem Cells**

Varsha Pursani<sup>1</sup>, Prasad Pethe<sup>1,2</sup>, Mohsin Bashir<sup>3</sup>, Prabha Sampath<sup>3</sup>, Vivek Tanavde<sup>4,5</sup>, Deepa Bhartiya<sup>1\*</sup>

**Supplementary table 1: Studies reporting the differentiation of ES cells into cardiac lineage and their transplantation**

| DIFFERENTIATION STUDIES                                        |                                                                                                                                                                                    |                    |                                                                                                                                                                               |                                                                                |
|----------------------------------------------------------------|------------------------------------------------------------------------------------------------------------------------------------------------------------------------------------|--------------------|-------------------------------------------------------------------------------------------------------------------------------------------------------------------------------|--------------------------------------------------------------------------------|
| Method                                                         | Differentiation technique and conditions                                                                                                                                           |                    | Efficiency                                                                                                                                                                    | Reference                                                                      |
| Embryoid Body (EB) formation                                   | hES cells placed in suspension cultures for 7-10 days to form EBs and replated on gelatine coated plates for 2 weeks                                                               |                    | 1% beating areas                                                                                                                                                              | Kehat et al <sup>1</sup>                                                       |
| Co-Culture with END2                                           | hES cells co-cultured with inactivated mouse visceral Endoderm-like cell line, END-2; maintained for upto 6 weeks.                                                                 |                    | 10% beating cardiomyocytes                                                                                                                                                    | Mummery et al <sup>2</sup>                                                     |
| Hanging Drop culture and 5-azacytidine treatment               | hES cells aggregated by hanging drop technique treated with 5-azacytidine for 1-3 days                                                                                             |                    | 70% beating clusters                                                                                                                                                          | Yoon et al <sup>3</sup>                                                        |
| Matrix sandwich protocol                                       | Sequential addition of Activin A and BMP4 to monolayered hES cells along with double layers of commercially available basement membrane Matrigel; cultured for 15 days             |                    | 80-90% beating areas                                                                                                                                                          | Zhang et al <sup>4</sup>                                                       |
| Directed differentiation techniques                            | Monolayered hES cells treated with recombinant Activin A (24 hrs.) and BMP4 (4 days); cultured in RPMI-B27 for 2-3 weeks                                                           |                    | More than 30% beating cardiomyocytes observed on 12 <sup>th</sup> day of differentiation                                                                                      | Laflamme et al <sup>5</sup>                                                    |
|                                                                | hES cell derived EBs treated sequentially with combinations of growth factors like BMP4 (24 hrs.), Activin A, bFGF (4 days), DKK1 and VEGF (4 days) during 14 days culture         |                    | 50-60% beating clusters around day 12                                                                                                                                         | Yang et al <sup>6</sup>                                                        |
|                                                                | Monolayered hES cells exposed to growth factors like Activin A (24 hrs.), BMP4 (4 days) and DKK1 (4 days) in RPMI-B27 medium; cultured for 20 days                                 |                    | 60-80% beating areas on day 20                                                                                                                                                | Pawani et al <sup>7</sup>                                                      |
| Manipulation of WNT pathway                                    | ES or iPS cells subjected to WNT/beta-catenin signalling stimulation with GSK3 inhibitor followed by its suppression using specific inhibitors along with growth factors like BMP4 |                    | 80-95% beating cardiomyocytes                                                                                                                                                 | Lian et al <sup>8</sup> ; Cao et al <sup>9</sup> ; Burrige et al <sup>10</sup> |
| TRANSPLANTATION STUDIES                                        |                                                                                                                                                                                    |                    |                                                                                                                                                                               |                                                                                |
| Cell source                                                    | Condition – Host                                                                                                                                                                   | Follow-up duration | Findings                                                                                                                                                                      | Reference                                                                      |
| Cardiomyocytes differentiated from hES cells (hES cells – CMs) | Complete heart block – Pig                                                                                                                                                         | 3 weeks            | Transplanted cells survived and coupled with the host cardiomyocytes electrically and histologically. No reports of teratoma formation                                        | Kehat et al <sup>11</sup>                                                      |
| hES cells - CMs                                                | Acute myocardial infarction – Rat                                                                                                                                                  | 60 days            | Transplanted cells engrafted with host cells histologically, attenuated ventricular tissue remodelling and improved myocardial performance. No teratomas reported.            | Caspi et al <sup>12</sup>                                                      |
| hES cells- CMs                                                 | Acute myocardial infarction – Mouse                                                                                                                                                | 12 weeks           | Improvements in ejection fraction observed at 4 weeks but not at 12 weeks.                                                                                                    | Van Laake et al <sup>13</sup>                                                  |
| hES cells - CMs                                                | Chronic myocardial infarction –Rat                                                                                                                                                 | 12 weeks           | Transplanted cells survive and proliferate, develop increased sarcomere organization. However no significant improvements in ventricular structure or function.               | Fernandes et al <sup>14</sup>                                                  |
| hES cells – cardiac progenitors (CPs)                          | Postmyocardial infarction - Rhesus monkey                                                                                                                                          | ≤12 weeks          | Transplantation reconstitutes about 20% of scar tissue. No teratoma observed.                                                                                                 | Blin et al <sup>15</sup>                                                       |
| mES cells - CPs                                                | Myocardial infarction – mouse                                                                                                                                                      | ≤4 weeks           | Transplanted cells engrafted in the infarct zone and formed gap junctions. Attenuated ventricular dilation and improved systolic and diastolic functions. No teratoma formed. | Christoforou et al <sup>16</sup>                                               |
| hES cells - CMs                                                | Acute myocardial infarction – Guinea pig                                                                                                                                           | 4 weeks            | Transplanted cells survived and integrated with host tissue. Suppressed arrhythmias.                                                                                          | Shiba et al <sup>17</sup>                                                      |
| hES cells - CMs                                                | Acute myocardial infarction – Rat                                                                                                                                                  | 8 weeks            | Transplanted cells engrafted histologically with the host cells. Functional improvements noted till 4 weeks.                                                                  | Moon et al <sup>18</sup>                                                       |
| HES cells – CPs, CMs                                           | Myocardial infarction - Rat                                                                                                                                                        | 4 weeks            | Transplanted cells; both CPs and CMs differentiated from hES cells improved ventricular dilation and systolic function and generated comparable grafts with host tissue.      | Fernandes et al <sup>19</sup>                                                  |

## References

1. Kehat, I. et al. Human embryonic stem cells can differentiate into myocytes with structural and functional properties of cardiomyocytes. *J Clin Invest.* **108**, 407-14 (2001).
2. Mummery, C. et al. Differentiation of human embryonic stem cells to cardiomyocytes: role of coculture with visceral endoderm-like cells. *Circulation.* **107**, 2733-40 (2003).
3. Yoon, B.S. et al. Enhanced differentiation of human embryonic stem cells into cardiomyocytes by combining hanging drop culture and 5-azacytidine treatment. *Differentiation.* **74**, 149-59 (2006).
4. Zhang, J. et al. Extracellular matrix promotes highly efficient cardiac differentiation of human pluripotent stem cells: the matrix sandwich method. *Circ Res.* **111**, 1125-36 (2012).
5. Laflamme, M.A. et al. Cardiomyocytes derived from human embryonic stem cells in pro-survival factors enhance function of infarcted rat hearts. *Nat Biotechnol.* **25**, 1015-24 (2007).
6. Yang, L. et al. Human cardiovascular progenitor cells develop from a KDR+ embryonic-stem-cell-derived population. *Nature.* **453**, 524-8 (2008).
7. Pawani, H., Nagvenkar, P., Pethe, P. & Bhartiya D. Differentiation of human ES cell line KIND-2 to yield tripotent cardiovascular progenitors. *In Vitro Cell Dev Biol Anim.* **49**, 82-93 (2013).
8. Lian, X. et al. Robust cardiomyocyte differentiation from human pluripotent stem cells via temporal modulation of canonical Wnt signaling. *Proc Natl Acad Sci U S A.* **109**, E1848-57 (2012).
9. Cao, N. et al. Ascorbic acid enhances the cardiac differentiation of induced pluripotent stem cells through promoting the proliferation of cardiac progenitor cells. *Cell Res.* **22**, 219-36 (2012).
10. Burridge, P.W. et al. Chemically defined generation of human cardiomyocytes. *Nat Methods.* **11**, 855-60 (2014).
11. Kehat, I. et al. Electromechanical integration of cardiomyocytes derived from human embryonic stem cells. *Nat Biotechnol.* **22**, 1282-9 (2004).
12. Caspi, O. et al. Transplantation of human embryonic stem cell-derived cardiomyocytes improves myocardial performance in infarcted rat hearts. *J Am Coll Cardiol.* **50**, 1884-93 (2007).
13. van Laake, L.W. et al. Human embryonic stem cell-derived cardiomyocytes survive and mature in the mouse heart and transiently improve function after myocardial infarction. *Stem Cell Res.* **1**, 9-24 (2007).
14. Fernandes, S. et al. Human embryonic stem cell-derived cardiomyocytes engraft but do not alter cardiac remodeling after chronic infarction in rats. *J. Mol. Cell. Cardiol.* **49**, 941-9 (2010).
15. Blin, G. et al. A purified population of multipotent cardiovascular progenitors derived from primate pluripotent stem cells engrafts in post myocardial infarcted nonhuman primates. *J Clin Invest.* **120**, 1125-39 (2010).
16. Christoforou, N. et al. Implantation of mouse embryonic stem cell-derived cardiac progenitor cells preserves function of infarcted murine hearts. *PLoS One.* **5**, e11536 (2010).
17. Shiba, Y. et al. Human ES-cell-derived cardiomyocytes electrically couple and suppress arrhythmias in injured hearts. *Nature.* **489**, 322-5 (2012).
18. Moon, S.H. et al. The use of aggregates of purified cardiomyocytes derived from human ESCs for functional engraftment after myocardial infarction. *Biomaterials.* **34**, 4013-26 (2013).
19. Fernandes, S. et al. Comparison of human embryonic stem cell-derived cardiomyocytes, cardiovascular progenitors, and bone marrow mononuclear cells for cardiac repair. *Stem Cell Reports.* **5**, 753-62 (2015).

### Maintenance of human embryonic stem cells

In-house derived human ES cells were grown on Geltrex (Invitrogen, Carlsbad, CA, USA) coated plates in Stempro hESC SFM medium (Invitrogen, Carlsbad, CA, USA) supplemented with basic fibroblast growth factor (bFGF) (R & D Systems, MN, USA) at a concentration of 8ng/ml in a humidified atmosphere of 37<sup>0</sup>C with 5% CO<sub>2</sub>. Cells were subcultured every 5-7 days by detaching them from the geltrex-coated plates mechanically using cell lifter (Sigma Aldrich, MO, USA). Prior to directed differentiation into cardiac lineage, undifferentiated hES cells were analyzed at both transcript and protein levels for the expression of pluripotent markers by qPCR, immunofluorescence and flow cytometry (Supplementary figures 3-5).

### Directed Differentiation

Undifferentiated human ES cells were subjected to a series of defined growth factors to direct the differentiation towards cardiac lineage by the protocol as reported previously by our group (Pawani et al. 2013) (Supplementary figure 1). Briefly, confluent monolayer cultures of human ES cells were treated with 100ng/ml Activin A (R & D Systems) and 5ng/ml of bFGF (R&D Systems) in serum free medium RPMI 1640 supplemented with 5% B-27 and 1% glutamax for 24 hrs. Next day fresh RPMI medium was added containing 15ng/ml BMP4 (R & D Systems) and 5ng/ml bFGF (R & D Systems) for another 4 days. This was then followed by 150ng/ml DKK1 (R & D Systems) containing fresh RPMI medium for 4 days. After this on day 9 of differentiation, cultures were maintained in basal medium of RPMI 1640 plus 5% B-27 and 1% glutamax for next 2 weeks till day 20 when the large detectable beating areas were observed. Basal media was changed every alternate day during the 2 week culture. Upon gene and marker analysis, the stages selected for the study included pluripotent hES cells at D0 (OCT4, NANOG, SOX2), CPs at D12 (MESP1, NKX2.5, MEF2C) and CMs at D0 (CTNT).

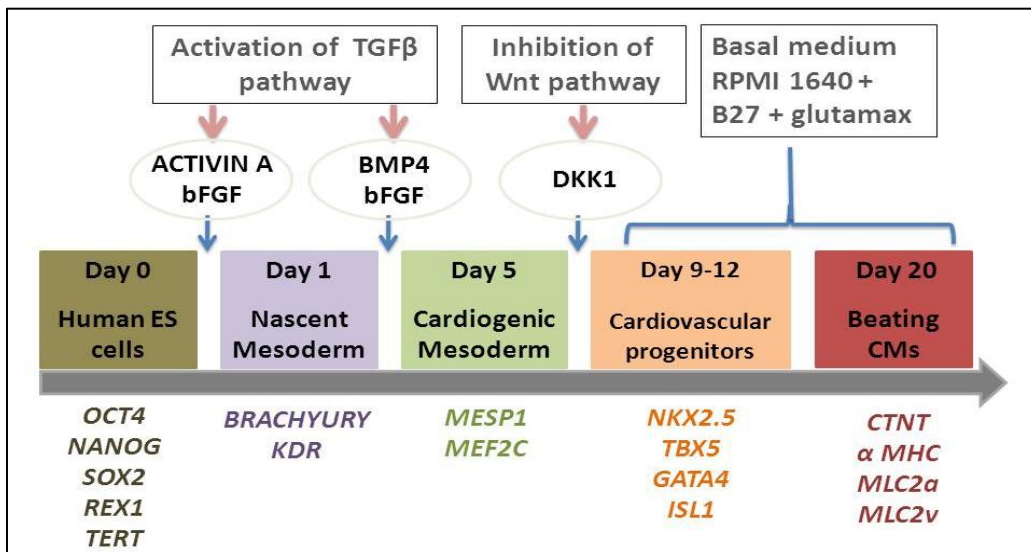

**Supplementary figure 1: Differentiation of hES cells into Cardiac lineage.** Schematic representation of the directed differentiation protocol followed for differentiation of hES cells into cardiac lineage.

### Cardiac directed differentiation of human ES cells

KIND1 cells differentiated into cardiac lineage using reported protocol (Supplementary Fig 1), showed distinct morphological changes (Supplementary figure 2).

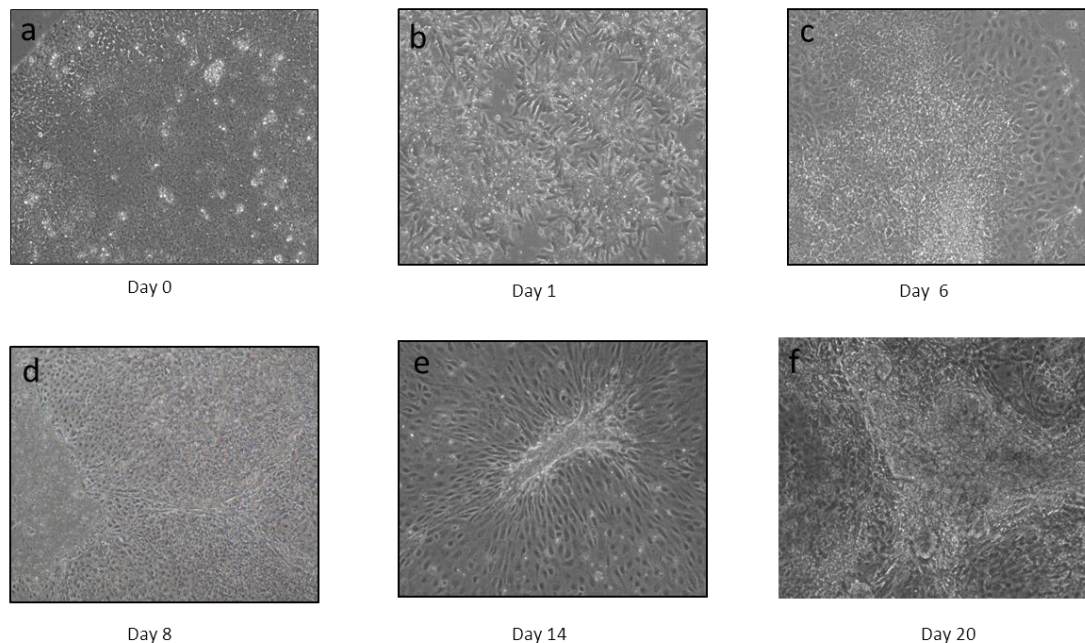

**Supplementary figure 2: Undifferentiated and differentiated hES cells.** Bright field images of hES cells during their cardiac directed differentiation (a) pluripotent KIND1 cells at D0, differentiation at days 1 (b), 6 (c), 8 (d), 14 (e) and 20 (f). D20 cells represent beating cardiomyocytes. Magnification 10X

### Characterization studies

Prior to directed differentiation into cardiac lineage, undifferentiated hES cells were analyzed at both transcript and protein levels for the expression of pluripotent markers by PCR and immunofluorescence respectively.

#### Quantitative Real-Time PCR (qRT-PCR)

Total RNA was isolated from undifferentiated hES cells using TRIzol reagent (Invitrogen, Carlsbad, CA, USA) as per manufacturer's instructions. The integrity and quality of RNA was confirmed spectrophotometrically using Ultraspec 3100 pro (GE Healthcare, PA, USA). First strand or cDNA synthesis was performed from 1 $\mu$ g of total RNA using iScript cDNA synthesis kit (Bio-Rad Laboratories, CA, USA) and random hexamer primers as per manufacturer's instructions using GSTORM thermal cycler (Gene Technologies, Baintree, UK). Expression of pluripotency transcripts and cardiac lineage transcripts was determined by Quantitative Real-Time PCR (qRT-PCR). qRT - PCR was performed using iQ SYBR Green Supermix (Bio Rad) on a CFX96 Real Time Machine (Bio Rad). The amplification programme consisted of the initial denaturation step at 95°C for 5 min, followed by 40 cycles of denaturation at 95°C for 10 sec, annealing at 62°C for 20 sec and elongation at 72°C for 30 sec. Fluorescence emitted at the end of each extension step was measured. The

specificity and homogeneity of the amplified product was confirmed by performing melt curve analysis at the end of each amplification cycle and also by electrophoresing the products on 2% agarose gel (Bangalore Genei). Human fetal and adult whole heart RNA were used to compare the maturity of the differentiated cells. The fold change was determined for each sample of different time points using the  $2^{-\Delta\Delta Ct}$  method and was expressed relative to that of GAPDH which was used as an internal control. The expression level of each gene transcript is normalized to a value of 1.0 for undifferentiated cells. The error bars represent  $\pm$  standard error of the mean (SEM). All the above results are an average of at least 3 biological replicates (Supplementary figure 3). Primers used are mentioned in Table 1.

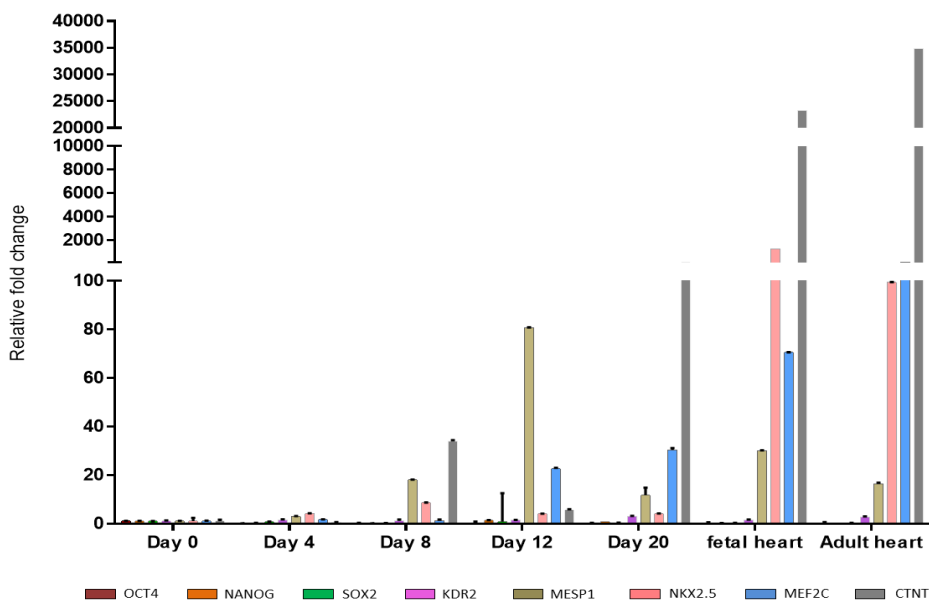

**Supplementary figure 3: Characterization of cardiac differentiation of hES cells by qPCR** Expression of transcripts representing pluripotency (OCT4, NANOG, SOX2), nascent mesoderm (KDR2), cardiac mesoderm (MESP1), cardiac progenitors (NKX2.5, MEF2C) and beating cardiomyocytes (CTNT) at days 0, 4, 8, 12, 20 during 20 days cardiac differentiation. Differentiation was also compared with the corresponding transcript levels in fetal and adult cardiac RNA obtained commercially. Error bars represent  $\pm$  SEM.

The differentiation into cardiac lineage was analyzed for appearance of cardiac progenitors and cardiomyocytes by qPCR (Supplementary figure 3). Substantial decrease of key pluripotent genes as compared to the appearance of KDR2 gene revealed the formation of mesodermal lineage that was directed towards cardiac fate was confirmed by the appearance of cardiac mesodermal genes like MESP1 and TBX5. Day 12 of directed differentiation marked the formation of cardiovascular progenitors characterized by the genes MEF2C, NKX2.5, VECAD and SMA that led to the formation of beating cardiomyocytes (movie) expressing CTNT and alpha MHC by day 20. Cardiomyocytes derived from hES cells indicated a consistent differentiation when compared with fetal and adult whole heart tissue RNA at the essential mesodermal transcripts level (Supplementary figure 3).

### Immunofluorescence

Undifferentiated human ES cells were subjected to immunostaining using specific primary antibodies to pluripotent markers. Briefly undifferentiated human ES cells were fixed with 4% paraformaldehyde (PFA) for 15 mins at room temperature followed by washing with 1X PBS plus 0.02% Tween 20 (Sigma Aldrich). Permeabilization for nuclear antigens was done with 0.3% triton X-100 (Sigma-Aldrich). Non-specific sites were blocked by blocking buffer containing 1X PBS plus 5% BSA (Sigma Aldrich) and 1% normal goat serum (Bangalore Genei, Bangalore, India) for 60mins at room temperature. The cells were then incubated with primary antibodies mouse anti OCT4 (1:200, Millipore, CA, USA), rabbit anti NANOG (1:200, Epitomics, CA, USA) and mouse anti SSEA4 (1:100, Millipore, CA, USA) diluted in blocking buffer for overnight at 4<sup>0</sup>C. This was followed by washing and incubation with conjugated secondary antibodies goat/rabbit Alexafluor 488 (1:1000, Molecular Probes, Invitrogen) diluted in blocking buffer for 2 hrs at room temperature. Counterstaining was done using 300nM 4,6-diamidino-2-phenylindole (DAPI) (Molecular Probes, Invitrogen). Images were captured under Fluorescent microscope (90i Nikon, Japan) or laser scanning confocal microscope (Carl Zeiss, Oberkochen, Germany) (Supplementary figure 4).

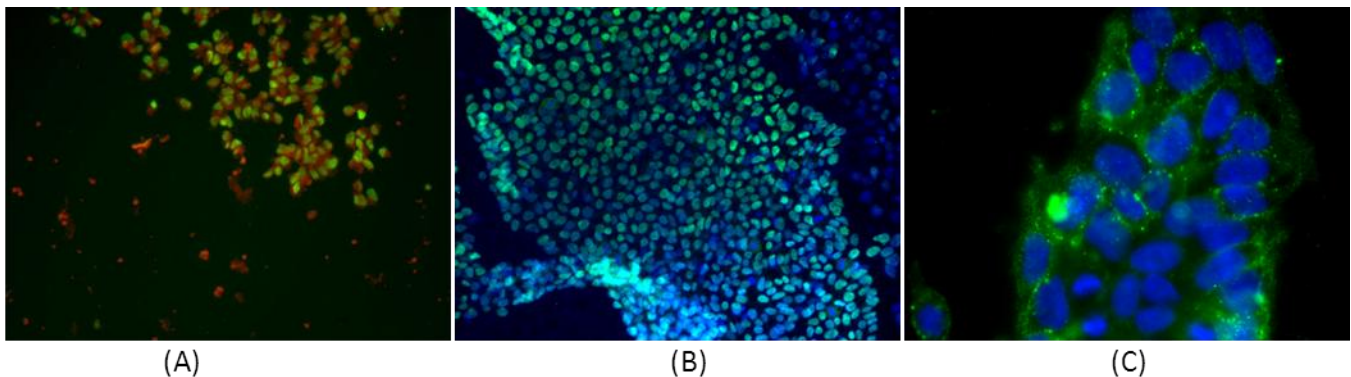

**Supplementary figure 4: Characterization of cardiac differentiation of hES cells by Immunofluorescence.** Immunofluorescence for OCT4 (red) (magnification 10X) (A) NANOG (green) (magnification 10X) (B) and SSEA4 (green) (magnification 20X) (C) in undifferentiated hES cells. Counter staining was done using PI for (A) and PI for (B) and (C). Magnifications 20X.

### Flow Cytometry characterization for undifferentiated and differentiated cells

Differentiated human ES cells were analyzed at undifferentiated and at both the cardiovascular progenitor stage and cardiomyocyte stage by flow cytometry (Supplementary figure 5). Cell cultures harvested in PBS were dissociated into single cells. Antibody used to stain the pluripotent hES cells was anti -OCT4 and for the cardiac progenitor stage cells was rabbit anti-human NKX2.5. For nuclear marker staining, cells were fixed in 2% paraformaldehyde for 15 mins followed by their permeabilization using 0.3% Triton-X 100. Following multiple washes, cell samples were run on BD FACS Aria (BD Biosciences, San Jose, CA, USA) and were analyzed using BD FACS Diva Software.

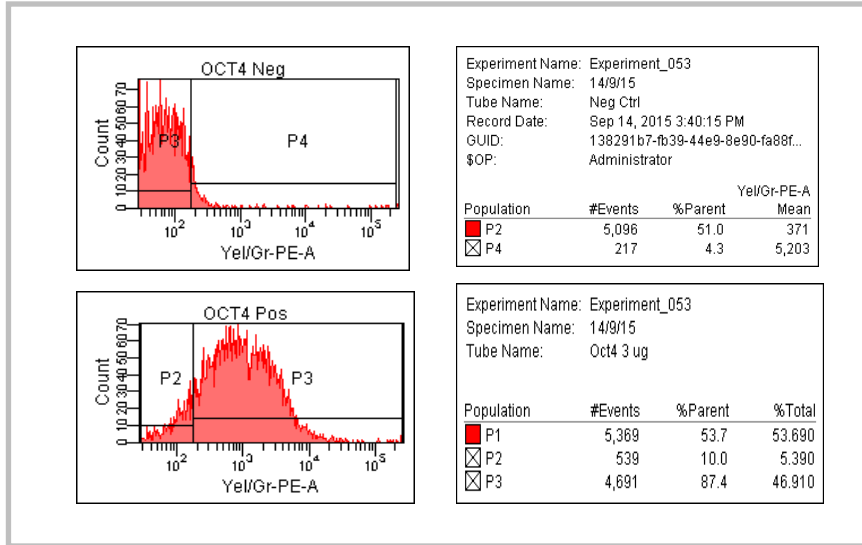

a

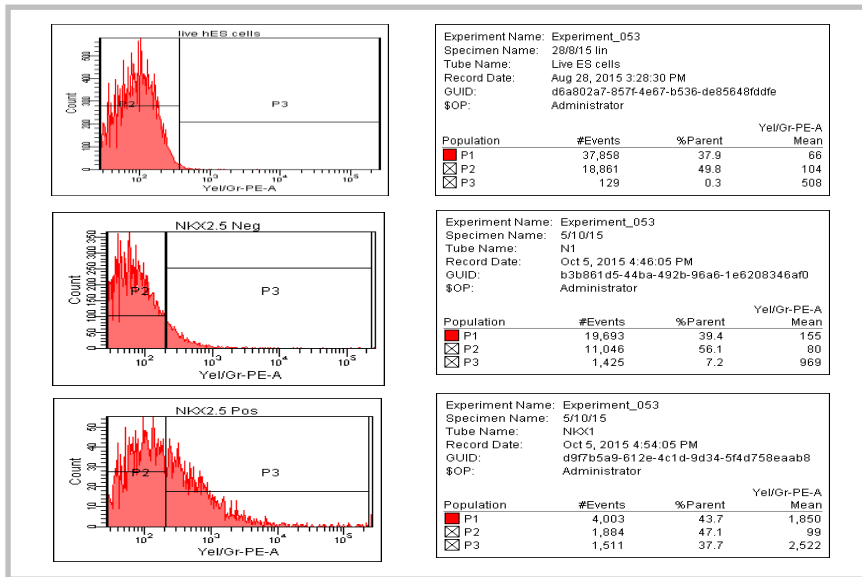

b

**Supplementary figure 5: Flow cytometric characterization:** Undifferentiated hES cells and differentiated cells were characterized by flow cytometry using OCT4 (A) for D0 cells and NKX2.5 (B) for D12 cells representing undifferentiated hES cells and cardiac progenitors respectively.



Microarray

Gene Ontology

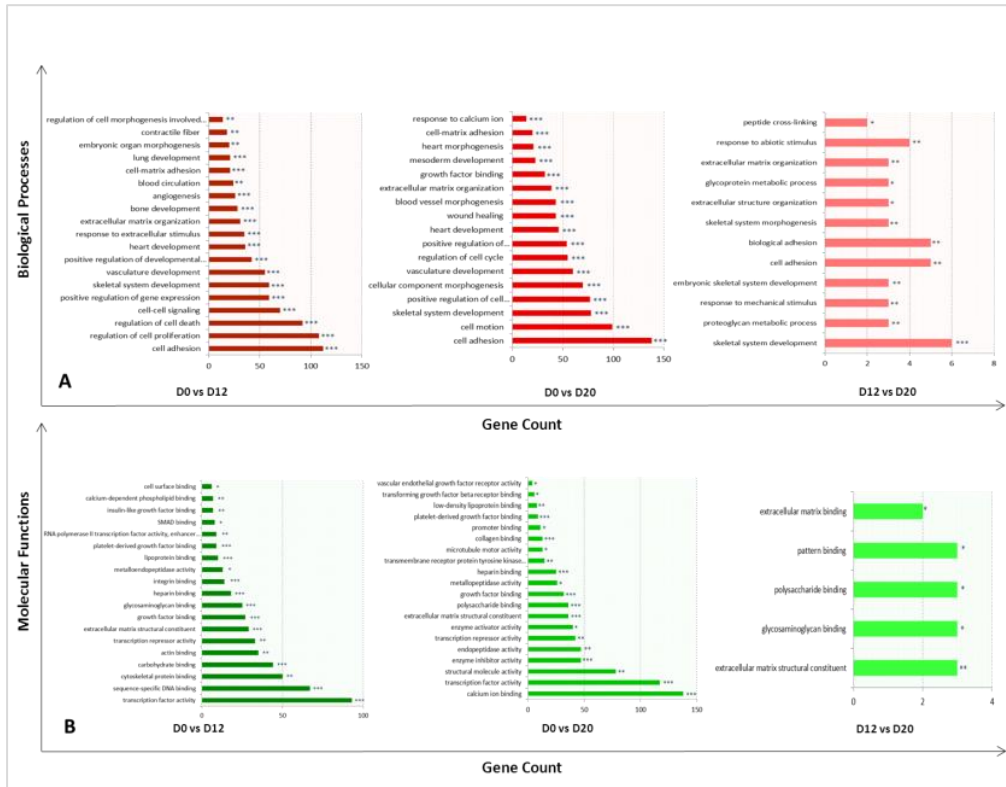

**Supplementary figure 6: Gene Ontology.** Significant annotations ( $p < 0.05$ ) during the differentiation of cells analysed according to the biological processes (A) and molecular functions (B). Pvalue  $< 0.05$  (\*),  $0.01$  (\*\*),  $0.001$  (\*\*\*)

Signaling pathways

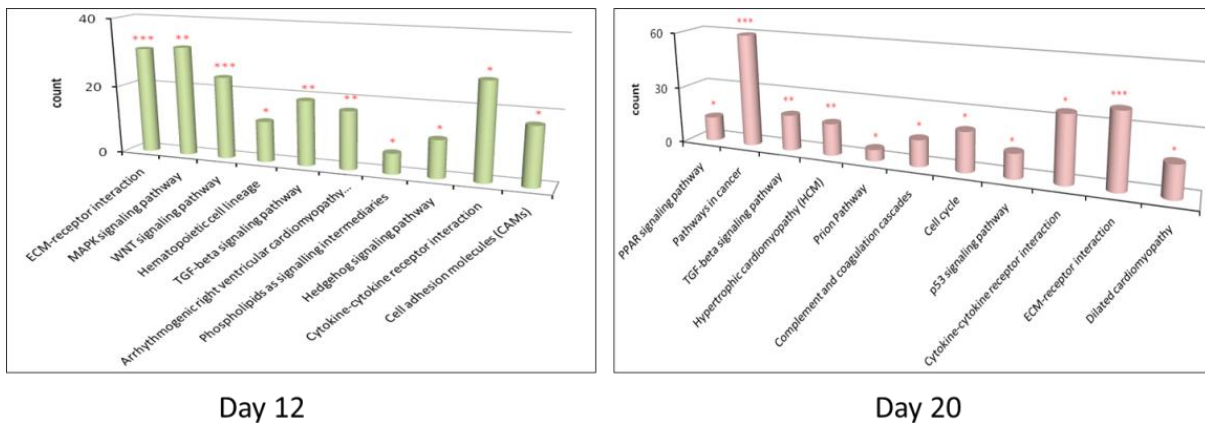

**Supplementary figure 7: Pathway classification of enriched transcripts during differentiation.** Up regulated genes searched against the KEGG and Biocarta pathway to identify the members of the signalling pathways involved during the cardiac differentiation. Pvalue  $< 0.05$  (\*),  $0.01$  (\*\*),  $0.001$  (\*\*\*)

## Microarray Data Validation

### Immunofluorescence

Microarray data was also validated at protein level by studying the immuno-expression of NKX2.5 and CTNT by confocal microscopy. Immuno-staining was performed as described above using the primary antibodies specific for markers of hES derived cardiac progenitors and cardiomyocytes; rabbit anti-human NKX2.5 (R&D Systems, MAB2444) (1:200) and mouse anti-human CTNT (Abcam, ab10214) (1:100). (Supplementary figure 8).

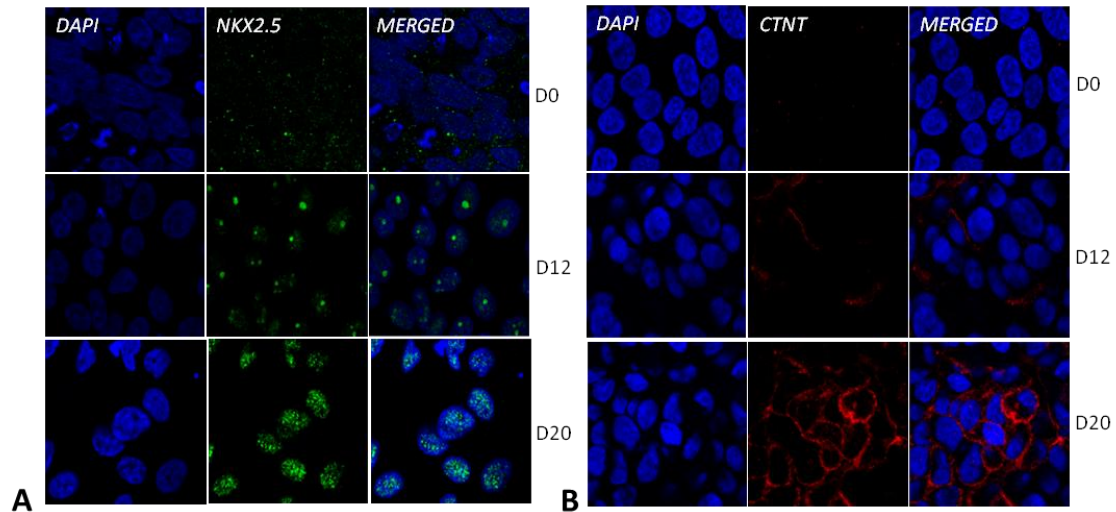

**Supplementary figure 8: Validation of Microarray data by Immunofluorescence.** Immunofluorescence for NKX2.5 (A) and CTNT (B) at days 0, 12 and 20. (A) Clearly shows the nuclear localization of NKX2.5 while (B) shows the surface localization of the surface marker CTNT. Also both the markers are absent at day 0. Counter staining was done using DAPI. Magnifications 20X.

**Supplementary table 2: Genes up regulated in D0 as compared to D12**

| Refseq_NM      | GeneSymbol   | D12/D0.fc | DEFINITION                                                                                                                        |
|----------------|--------------|-----------|-----------------------------------------------------------------------------------------------------------------------------------|
| NM_002522.2    | NPTX1        | -32.593   | Homo sapiens neuronal pentraxin I (NPTX1), mRNA.                                                                                  |
| NM_007015.2    | LECT1        | -16.402   | Homo sapiens leukocyte cell derived chemotaxin 1 (LECT1), transcript variant 1, mRNA.                                             |
| NM_007015.2    | LECT1        | -15.327   | Homo sapiens leukocyte cell derived chemotaxin 1 (LECT1), transcript variant 1, mRNA.                                             |
| NM_002164.3    | INDO         | -13.881   | Homo sapiens indoleamine-pyrrole 2,3 dioxygenase (INDO), mRNA.                                                                    |
| NM_002164.4    | IDO1         | -12.805   | Homo sapiens indoleamine 2,3-dioxygenase 1 (IDO1), mRNA.                                                                          |
| NM_022034.4    | CUZD1        | -10.320   | Homo sapiens CUB and zona pellucida-like domains 1 (CUZD1), mRNA.                                                                 |
| NM_014279.4    | OLFM1        | -9.391    | Homo sapiens olfactomedin 1 (OLFM1), transcript variant 1, mRNA.                                                                  |
| NM_003106.2    | SOX2         | -9.109    | Homo sapiens SRY (sex determining region Y)-box 2 (SOX2), mRNA.                                                                   |
| AL833138       |              | -8.576    | Homo sapiens mRNA; cDNA DKFZp313A1040 (from clone DKFZp313A1040)                                                                  |
| NM_002523.1    | NPTX2        | -8.278    | Homo sapiens neuronal pentraxin II (NPTX2), mRNA.                                                                                 |
| NM_015715.3    | PLA2G3       | -8.222    | Homo sapiens phospholipase A2, group III (PLA2G3), mRNA.                                                                          |
| NM_138328.2    | RHBDL3       | -8.039    | Homo sapiens rhomboid, veinlet-like 3 (Drosophila) (RHBDL3), mRNA.                                                                |
| NM_003106.2    | SOX2         | -7.544    | Homo sapiens SRY (sex determining region Y)-box 2 (SOX2), mRNA.                                                                   |
| NM_005296.1    | LPAR4        | -6.981    | Homo sapiens lysophosphatidic acid receptor 4 (LPAR4), mRNA.                                                                      |
| NM_005756.2    | GPR64        | -6.821    | Homo sapiens G protein-coupled receptor 64 (GPR64), transcript variant 2, mRNA.                                                   |
| AL049310       |              | -6.745    | Homo sapiens mRNA; cDNA DKFZp564B206 (from clone DKFZp564B206)                                                                    |
| NM_152779.2    | GLIPR1L1     | -6.702    | Homo sapiens GLI pathogenesis-related 1 like 1 (GLIPR1L1), mRNA.                                                                  |
| NM_198139.1    | SEMG1        | -6.574    | Homo sapiens semenogelin I (SEMG1), transcript variant 2, mRNA.                                                                   |
| NM_024046.3    | CAMKV        | -6.442    | Homo sapiens CaM kinase-like vesicle-associated (CAMKV), mRNA.                                                                    |
| NM_001217.3    | CA11         | -6.437    | Homo sapiens carbonic anhydrase XI (CA11), mRNA.                                                                                  |
| NM_032884.2    | C1orf94      | -6.430    | Homo sapiens chromosome 1 open reading frame 94 (C1orf94), mRNA.                                                                  |
| NM_022144.1    | TNMD         | -6.338    | Homo sapiens tenomodulin (TNMD), mRNA.                                                                                            |
| NM_001042403.1 | USP44        | -6.283    | Homo sapiens ubiquitin specific peptidase 44 (USP44), transcript variant 2, mRNA.                                                 |
| NM_032803.4    | SLC7A3       | -6.248    | Homo sapiens solute carrier family 7 (cationic amino acid transporter, y+ system), member 3 (SLC7A3), transcript variant 2, mRNA. |
| AF038185       |              | -6.112    | Homo sapiens clone 23700 mRNA sequence                                                                                            |
| NR_003491.1    | MIAT         | -5.940    | Homo sapiens myocardial infarction associated transcript (non-protein coding) (MIAT), non-coding RNA.                             |
| NM_001042403.1 | USP44        | -5.897    | Homo sapiens ubiquitin specific peptidase 44 (USP44), transcript variant 2, mRNA.                                                 |
| NM_004538.3    | NAP1L3       | -5.787    | Homo sapiens nucleosome assembly protein 1-like 3 (NAP1L3), mRNA.                                                                 |
| NM_007129.2    | ZIC2         | -5.765    | Homo sapiens Zic family member 2 (odd-paired homolog, Drosophila) (ZIC2), mRNA.                                                   |
| NM_172337.1    | OTX2         | -5.714    | Homo sapiens orthodenticle homeobox 2 (OTX2), transcript variant 2, mRNA.                                                         |
| NM_003459.4    | SLC30A3      | -5.670    | Homo sapiens solute carrier family 30 (zinc transporter), member 3 (SLC30A3), mRNA.                                               |
| NM_006334.3    | OLFM1        | -5.654    | Homo sapiens olfactomedin 1 (OLFM1), transcript variant 2, mRNA.                                                                  |
| XM_001723077.1 | LOC100132934 | -5.649    | PREDICTED: Homo sapiens similar to hCG1644233 (LOC100132934), mRNA.                                                               |
| NM_015541.2    | LRIG1        | -5.645    | Homo sapiens leucine-rich repeats and immunoglobulin-like domains 1 (LRIG1), mRNA.                                                |
| NM_002851.2    | PTPRZ1       | -5.639    | Homo sapiens protein tyrosine phosphatase, receptor-type, Z polypeptide 1                                                         |

|                |           |        |                                                                                                                                   |
|----------------|-----------|--------|-----------------------------------------------------------------------------------------------------------------------------------|
|                |           |        | (PTPRZ1), mRNA.                                                                                                                   |
| NM_032446.1    | MEGF10    | -5.571 | Homo sapiens multiple EGF-like-domains 10 (MEGF10), mRNA.                                                                         |
| NM_001079859.1 | GPR64     | -5.556 | Homo sapiens G protein-coupled receptor 64 (GPR64), transcript variant 2, mRNA.                                                   |
| NM_004734.2    | DCLK1     | -5.544 | Homo sapiens doublecortin-like kinase 1 (DCLK1), mRNA.                                                                            |
| NM_000517.3    | HBA2      | -5.499 | Homo sapiens hemoglobin, alpha 2 (HBA2), mRNA.                                                                                    |
| XR_039453.1    | LOC646316 | -5.497 | PREDICTED: Homo sapiens misc_RNA (LOC646316), miscRNA.                                                                            |
| NM_014474.2    | SMPDL3B   | -5.465 | Homo sapiens sphingomyelin phosphodiesterase, acid-like 3B (SMPDL3B), transcript variant 1, mRNA.                                 |
| NM_002993.2    | CXCL6     | -5.448 | Homo sapiens chemokine (C-X-C motif) ligand 6 (granulocyte chemotactic protein 2) (CXCL6), mRNA.                                  |
| NM_181876.2    | PPP2R2C   | -5.440 | Homo sapiens protein phosphatase 2 (formerly 2A), regulatory subunit B, gamma isoform (PPP2R2C), transcript variant 2, mRNA.      |
| NM_003706.1    | PLA2G4C   | -5.406 | Homo sapiens phospholipase A2, group IVC (cytosolic, calcium-independent) (PLA2G4C), mRNA.                                        |
| NM_000517.3    | HBA2      | -5.339 | Homo sapiens hemoglobin, alpha 2 (HBA2), mRNA.                                                                                    |
| NM_004744.3    | LRAT      | -5.336 | Homo sapiens lecithin retinol acyltransferase (phosphatidylcholine--retinol O-acyltransferase) (LRAT), mRNA.                      |
| NM_005634.2    | SOX3      | -5.333 | Homo sapiens SRY (sex determining region Y)-box 3 (SOX3), mRNA.                                                                   |
| NM_002006.3    | FGF2      | -5.286 | Homo sapiens fibroblast growth factor 2 (basic) (FGF2), mRNA.                                                                     |
| NM_005314.2    | GRPR      | -5.269 | Homo sapiens gastrin-releasing peptide receptor (GRPR), mRNA.                                                                     |
| NM_006467.2    | POLR3G    | -5.258 | Homo sapiens polymerase (RNA) III (DNA directed) polypeptide G (32kD) (POLR3G), mRNA.                                             |
| NM_001001995.1 | GPM6B     | -5.256 | Homo sapiens glycoprotein M6B (GPM6B), transcript variant 1, mRNA.                                                                |
| NM_015541.2    | LRIG1     | -5.253 | Homo sapiens leucine-rich repeats and immunoglobulin-like domains 1 (LRIG1), mRNA.                                                |
| XM_498560.3    | LOC440132 | -5.188 | PREDICTED: Homo sapiens hypothetical LOC440132 (LOC440132), mRNA.                                                                 |
| NM_001851.3    | COL9A1    | -5.158 | Homo sapiens collagen, type IX, alpha 1 (COL9A1), transcript variant 1, mRNA.                                                     |
| NM_080390.3    | TCEAL2    | -5.094 | Homo sapiens transcription elongation factor A (SII)-like 2 (TCEAL2), mRNA.                                                       |
| NM_002701.4    | POU5F1    | -5.033 | Homo sapiens POU class 5 homeobox 1 (POU5F1), transcript variant 1, mRNA.                                                         |
| NM_000892.3    | KLKB1     | -5.025 | Homo sapiens kallikrein B, plasma (Fletcher factor) 1 (KLKB1), mRNA.                                                              |
| NM_015184.3    | PLCL2     | -5.023 | Homo sapiens phospholipase C-like 2 (PLCL2), mRNA.                                                                                |
| NM_004522.1    | KIF5C     | -4.980 | Homo sapiens kinesin family member 5C (KIF5C), mRNA.                                                                              |
| NM_032805.1    | ZSCAN10   | -4.950 | Homo sapiens zinc finger and SCAN domain containing 10 (ZSCAN10), mRNA.                                                           |
| NM_172337.1    | OTX2      | -4.855 | Homo sapiens orthodenticle homeobox 2 (OTX2), transcript variant 2, mRNA.                                                         |
| NM_006875.2    | PIM2      | -4.841 | Homo sapiens pim-2 oncogene (PIM2), mRNA.                                                                                         |
| NM_018228.1    | C14orf180 | -4.807 | Homo sapiens chromosome 14 open reading frame 115 (C14orf115), mRNA.                                                              |
| NM_003865.1    | HESX1     | -4.772 | Homo sapiens HESX homeobox 1 (HESX1), mRNA.                                                                                       |
| NR_002304.1    | POU5F1P1  | -4.771 | Homo sapiens POU class 5 homeobox 1 pseudogene 1 (POU5F1P1), non-coding RNA.                                                      |
| NM_012183.1    | FOXD3     | -4.742 | Homo sapiens forkhead box D3 (FOXD3), mRNA.                                                                                       |
| NM_000478.3    | ALPL      | -4.709 | Homo sapiens alkaline phosphatase, liver/bone/kidney (ALPL), transcript variant 1, mRNA.                                          |
| NM_001048164.1 | SLC7A3    | -4.696 | Homo sapiens solute carrier family 7 (cationic amino acid transporter, y+ system), member 3 (SLC7A3), transcript variant 2, mRNA. |
| NM_172109.1    | KCNQ2     | -4.692 | Homo sapiens potassium voltage-gated channel, KQT-like subfamily, member 2 (KCNQ2), transcript variant 5, mRNA.                   |
| NR_024281.1    | LOC157627 | -4.654 | Homo sapiens hypothetical LOC157627 (LOC157627), non-coding RNA.                                                                  |

|                |           |        |                                                                                                                                                            |
|----------------|-----------|--------|------------------------------------------------------------------------------------------------------------------------------------------------------------|
| NM_005407.1    | SALL2     | -4.652 | Homo sapiens sal-like 2 (Drosophila) (SALL2), mRNA.                                                                                                        |
| NM_001010940.1 | C9orf135  | -4.604 | Homo sapiens chromosome 9 open reading frame 135 (C9orf135), mRNA.                                                                                         |
| NM_005314.2    | GRPR      | -4.589 | Homo sapiens gastrin-releasing peptide receptor (GRPR), mRNA.                                                                                              |
| NM_006159.1    | NELL2     | -4.563 | Homo sapiens NEL-like 2 (chicken) (NELL2), mRNA.                                                                                                           |
| NM_024504.2    | PRDM14    | -4.552 | Homo sapiens PR domain containing 14 (PRDM14), mRNA.                                                                                                       |
| NM_001014809.1 | CRMP1     | -4.527 | Homo sapiens collapsin response mediator protein 1 (CRMP1), transcript variant 1, mRNA.                                                                    |
| NR_002304.1    | POU5F1P1  | -4.466 | Homo sapiens POU class 5 homeobox 1 pseudogene 1 (POU5F1P1), non-coding RNA.                                                                               |
| NM_003739.4    | AKR1C3    | -4.434 | Homo sapiens aldo-keto reductase family 1, member C3 (3-alpha hydroxysteroid dehydrogenase, type II) (AKR1C3), mRNA.                                       |
| XR_016333.1    | LOC642559 | -4.408 | PREDICTED: Homo sapiens similar to POU domain, class 5, transcription factor 1 (Octamer-binding transcription factor 3) (Oct-3) (Oct-4) (LOC642559), mRNA. |
| NM_001009568.1 | SMPDL3B   | -4.401 | Homo sapiens sphingomyelin phosphodiesterase, acid-like 3B (SMPDL3B), transcript variant 2, mRNA.                                                          |
| NM_003413.2    | ZIC3      | -4.399 | Homo sapiens Zic family member 3 heterotaxy 1 (odd-paired homolog, Drosophila) (ZIC3), mRNA.                                                               |
| NM_001001995.1 | GPM6B     | -4.383 | Homo sapiens glycoprotein M6B (GPM6B), transcript variant 1, mRNA.                                                                                         |
| NM_004734.2    | DCLK1     | -4.363 | Homo sapiens doublecortin-like kinase 1 (DCLK1), mRNA.                                                                                                     |
| XM_939432.1    | MGC61598  | -4.350 | PREDICTED: Homo sapiens similar to ankyrin-repeat protein Nrarp (MGC61598), mRNA.                                                                          |
| NM_004615.2    | TSPAN7    | -4.327 | Homo sapiens tetraspanin 7 (TSPAN7), mRNA.                                                                                                                 |
| NM_001080430.1 | TOX3      | -4.303 | Homo sapiens TOX high mobility group box family member 3 (TOX3), mRNA.                                                                                     |
| NM_007084.2    | SOX21     | -4.301 | Homo sapiens SRY (sex determining region Y)-box 21 (SOX21), mRNA.                                                                                          |
| NM_013364.4    | PNMA3     | -4.294 | Homo sapiens paraneoplastic antigen MA3 (PNMA3), mRNA.                                                                                                     |
| NM_003541.2    | HIST1H4K  | -4.248 | Homo sapiens histone cluster 1, H4k (HIST1H4K), mRNA.                                                                                                      |
| NM_001018109.1 | PIR       | -4.241 | Homo sapiens pirin (iron-binding nuclear protein) (PIR), transcript variant 2, mRNA.                                                                       |
| NM_014474.2    | SMPDL3B   | -4.157 | Homo sapiens sphingomyelin phosphodiesterase, acid-like 3B (SMPDL3B), transcript variant 1, mRNA.                                                          |
| XM_001134320.1 | FLJ25404  | -4.151 | PREDICTED: Homo sapiens hypothetical protein FLJ25404, transcript variant 2 (FLJ25404), mRNA.                                                              |
| NM_152737.2    | RNF182    | -4.118 | Homo sapiens ring finger protein 182 (RNF182), mRNA.                                                                                                       |
| AL136588       |           | -4.104 | Homo sapiens mRNA; cDNA DKFZp761D112 (from clone DKFZp761D112)                                                                                             |
| NM_203400.1    | RPRML     | -4.096 | Homo sapiens reprimin-like (RPRML), mRNA.                                                                                                                  |
| NM_014692.1    | SEC14L5   | -4.095 | Homo sapiens SEC14-like 5 (S. cerevisiae) (SEC14L5), mRNA.                                                                                                 |
| AK123661       |           | -4.050 | Homo sapiens cDNA FLJ41667 fis, clone FEBRA2028366                                                                                                         |
| NM_012419.4    | RGS17     | -4.037 | Homo sapiens regulator of G-protein signaling 17 (RGS17), mRNA.                                                                                            |
| NM_013243.2    | SCG3      | -4.019 | Homo sapiens secretogranin III (SCG3), mRNA.                                                                                                               |
| NM_001449.3    | FHL1      | -4.004 | Homo sapiens four and a half LIM domains 1 (FHL1), mRNA.                                                                                                   |
| NM_003218.2    | TERF1     | -4.003 | Homo sapiens telomeric repeat binding factor (NIMA-interacting) 1 (TERF1), transcript variant 2, mRNA.                                                     |
| NM_005763.2    | AASS      | -4.003 | Homo sapiens amino adipate-semialdehyde synthase (AASS), nuclear gene encoding mitochondrial protein, mRNA.                                                |
| NM_017522.3    | LRP8      | -4.000 | Homo sapiens low density lipoprotein receptor-related protein 8, apolipoprotein E receptor (LRP8), transcript variant 4, mRNA.                             |
| NM_181676.1    | PPP2R2B   | -3.993 | Homo sapiens protein phosphatase 2 (formerly 2A), regulatory subunit B, beta isoform (PPP2R2B), transcript variant 4, mRNA.                                |
| NM_000216.2    | KAL1      | -3.992 | Homo sapiens Kallmann syndrome 1 sequence (KAL1), mRNA.                                                                                                    |

|                |           |        |                                                                                                                                                                     |
|----------------|-----------|--------|---------------------------------------------------------------------------------------------------------------------------------------------------------------------|
| NM_018476.3    | BEX1      | -3.989 | Homo sapiens brain expressed, X-linked 1 (BEX1), mRNA.                                                                                                              |
| AK091593       |           | -3.982 | Homo sapiens cDNA FLJ34274 fis, clone FEBRA2003327                                                                                                                  |
| NM_001823.3    | CKB       | -3.986 | Homo sapiens creatine kinase, brain (CKB), mRNA.                                                                                                                    |
| NM_020927.1    | VAT1L     | -3.950 | Homo sapiens vesicle amine transport protein 1 homolog (T. californica)-like (VAT1L), mRNA.                                                                         |
| NM_033036.2    | GAL3ST3   | -3.942 | Homo sapiens galactose-3-O-sulfotransferase 3 (GAL3ST3), mRNA.                                                                                                      |
| NM_016307.3    | PRRX2     | -3.916 | Homo sapiens paired related homeobox 2 (PRRX2), mRNA.                                                                                                               |
| NM_138786.1    | TM4SF18   | -3.902 | Homo sapiens transmembrane 4 L six family member 18 (TM4SF18), mRNA.                                                                                                |
| NM_012281.2    | KCND2     | -3.903 | Homo sapiens potassium voltage-gated channel, Shal-related subfamily, member 2 (KCND2), mRNA.                                                                       |
| NM_020659.2    | TTYH1     | -3.860 | Homo sapiens tweety homolog 1 (Drosophila) (TTYH1), transcript variant 1, mRNA.                                                                                     |
| NM_021127.1    | PMAIP1    | -3.839 | Homo sapiens phorbol-12-myristate-13-acetate-induced protein 1 (PMAIP1), mRNA.                                                                                      |
| NM_173462.3    | PAPLN     | -3.824 | Homo sapiens papilin, proteoglycan-like sulfated glycoprotein (PAPLN), mRNA.                                                                                        |
| NM_001038.4    | SCNN1A    | -3.816 | Homo sapiens sodium channel, nonvoltage-gated 1 alpha (SCNN1A), mRNA.                                                                                               |
| NM_174936.2    | PCSK9     | -3.801 | Homo sapiens proprotein convertase subtilisin/kexin type 9 (PCSK9), mRNA.                                                                                           |
| NM_000869.2    | HTR3A     | -3.787 | Homo sapiens 5-hydroxytryptamine (serotonin) receptor 3A (HTR3A), transcript variant 2, mRNA.                                                                       |
| NM_020997.2    | LEFTY1    | -3.784 | Homo sapiens left-right determination factor 1 (LEFTY1), mRNA.                                                                                                      |
| NM_003507.1    | FZD7      | -3.775 | Homo sapiens frizzled homolog 7 (Drosophila) (FZD7), mRNA.                                                                                                          |
| NM_133448.1    | TMEM132D  | -3.770 | Homo sapiens transmembrane protein 132D (TMEM132D), mRNA.                                                                                                           |
| NM_017899.2    | TESC      | -3.764 | Homo sapiens tescalcin (TESC), mRNA.                                                                                                                                |
| NM_000814.4    | GABRB3    | -3.754 | Homo sapiens gamma-aminobutyric acid (GABA) A receptor, beta 3 (GABRB3), transcript variant 1, mRNA.                                                                |
| NM_020211.1    | RGMA      | -3.753 | Homo sapiens RGM domain family, member A (RGMA), mRNA.                                                                                                              |
| NM_181505.1    | PPP1R1B   | -3.746 | Homo sapiens protein phosphatase 1, regulatory (inhibitor) subunit 1B (dopamine and cAMP regulated phosphoprotein, DARPP-32) (PPP1R1B), transcript variant 2, mRNA. |
| NM_031845.2    | MAP2      | -3.735 | Homo sapiens microtubule-associated protein 2 (MAP2), transcript variant 1, mRNA.                                                                                   |
| NM_016518.2    | PIPOX     | -3.726 | Homo sapiens pipecolic acid oxidase (PIPOX), mRNA.                                                                                                                  |
| NM_003524.2    | HIST1H2BH | -3.690 | Homo sapiens histone cluster 1, H2bh (HIST1H2BH), mRNA.                                                                                                             |
| NM_006892.3    | DNMT3B    | -3.688 | Homo sapiens DNA (cytosine-5-)-methyltransferase 3 beta (DNMT3B), transcript variant 1, mRNA.                                                                       |
| NM_052943.2    | FAM46B    | -3.686 | Homo sapiens family with sequence similarity 46, member B (FAM46B), mRNA.                                                                                           |
| XM_001717875.1 | LOC732445 | -3.670 | PREDICTED: Homo sapiens similar to alpha 7 neuronal nicotinic acetylcholine receptor (LOC732445), mRNA.                                                             |
| NM_138786.2    | TM4SF18   | -3.658 | Homo sapiens transmembrane 4 L six family member 18 (TM4SF18), mRNA.                                                                                                |
| NM_032512.2    | PDZD4     | -3.654 | Homo sapiens PDZ domain containing 4 (PDZD4), mRNA.                                                                                                                 |
| NM_005763.2    | AASS      | -3.648 | Homo sapiens amino adipate-semialdehyde synthase (AASS), nuclear gene encoding mitochondrial protein, mRNA.                                                         |
| NM_001080466.1 | BTBD17    | -3.646 | Homo sapiens BTB (POZ) domain containing 17 (BTBD17), mRNA.                                                                                                         |
| XR_015766.1    | LOC730051 | -3.631 | PREDICTED: Homo sapiens similar to Zinc finger protein 418 (LOC730051), mRNA.                                                                                       |
| NM_001275.3    | CHGA      | -3.630 | Homo sapiens chromogranin A (parathyroid secretory protein 1) (CHGA), mRNA.                                                                                         |
| NM_182728.1    | SLC7A8    | -3.621 | Homo sapiens solute carrier family 7 (cationic amino acid transporter, $\gamma$ -system), member 8 (SLC7A8), transcript variant 2, mRNA.                            |
| NM_003026.1    | SH3GL2    | -3.619 | Homo sapiens SH3-domain GRB2-like 2 (SH3GL2), mRNA.                                                                                                                 |

|                |              |        |                                                                                                                                    |
|----------------|--------------|--------|------------------------------------------------------------------------------------------------------------------------------------|
| NM_170678.2    | ITGB1BP3     | -3.619 | Homo sapiens integrin beta 1 binding protein 3 (ITGB1BP3), mRNA.                                                                   |
| NM_019035.2    | PCDH18       | -3.618 | Homo sapiens protocadherin 18 (PCDH18), mRNA.                                                                                      |
| XM_928013.1    | ACBD7        | -3.615 | PREDICTED: Homo sapiens acyl-Coenzyme A binding domain containing 7 (ACBD7), mRNA.                                                 |
| NM_173798.2    | ZCCHC12      | -3.603 | Homo sapiens zinc finger, CCHC domain containing 12 (ZCCHC12), mRNA.                                                               |
| XM_939725.2    | LOC654127    | -3.579 | PREDICTED: Homo sapiens similar to adaptor-related protein complex 1 sigma 2 subunit (LOC654127), mRNA.                            |
| NR_029858.1    | MIR302C      | -3.577 | Homo sapiens microRNA 302c (MIR302C), microRNA.                                                                                    |
| NM_005382.1    | NEFM         | -3.569 | Homo sapiens neurofilament, medium polypeptide 150kDa (NEFM), mRNA.                                                                |
| NM_018602.2    | DNAJA4       | -3.567 | Homo sapiens DnaJ (Hsp40) homolog, subfamily A, member 4 (DNAJA4), mRNA.                                                           |
| NM_002374.3    | MAP2         | -3.549 | Homo sapiens microtubule-associated protein 2 (MAP2), transcript variant 1, mRNA.                                                  |
| NM_019013.1    | FAM64A       | -3.547 | Homo sapiens family with sequence similarity 64, member A (FAM64A), mRNA.                                                          |
| NM_017753.2    | LPPR1        | -3.545 | Homo sapiens lipid phosphate phosphatase-related protein type 1 (LPPR1), transcript variant 2, mRNA.                               |
| NM_024785.2    | FAM124B      | -3.535 | Homo sapiens family with sequence similarity 124B (FAM124B), transcript variant 2, mRNA.                                           |
| NM_003822.3    | NR5A2        | -3.531 | Homo sapiens nuclear receptor subfamily 5, group A, member 2 (NR5A2), transcript variant 2, mRNA.                                  |
| NM_024674.4    | LIN28        | -3.521 | Homo sapiens lin-28 homolog (C. elegans) (LIN28), mRNA.                                                                            |
| NM_002517.2    | NPAS1        | -3.489 | Homo sapiens neuronal PAS domain protein 1 (NPAS1), mRNA.                                                                          |
| NM_001005502.1 | CPM          | -3.482 | Homo sapiens carboxypeptidase M (CPM), transcript variant 3, mRNA.                                                                 |
| NM_032446.1    | MEGF10       | -3.480 | Homo sapiens multiple EGF-like-domains 10 (MEGF10), mRNA.                                                                          |
| NM_014996.1    | PLCH1        | -3.469 | Homo sapiens phospholipase C, eta 1 (PLCH1), mRNA.                                                                                 |
| NM_003822.3    | NR5A2        | -3.456 | Homo sapiens nuclear receptor subfamily 5, group A, member 2 (NR5A2), transcript variant 2, mRNA.                                  |
| NM_002006.4    | FGF2         | -3.448 | Homo sapiens fibroblast growth factor 2 (basic) (FGF2), mRNA.                                                                      |
| NM_013243.2    | SCG3         | -3.442 | Homo sapiens secretogranin III (SCG3), mRNA.                                                                                       |
| NM_030763.1    | NSBP1        | -3.440 | Homo sapiens nucleosomal binding protein 1 (NSBP1), mRNA.                                                                          |
| NM_181676.1    | PPP2R2B      | -3.438 | Homo sapiens protein phosphatase 2 (formerly 2A), regulatory subunit B, beta isoform (PPP2R2B), transcript variant 4, mRNA.        |
| NM_006467.2    | POLR3G       | -3.437 | Homo sapiens polymerase (RNA) III (DNA directed) polypeptide G (32kD) (POLR3G), mRNA.                                              |
| XM_946212.2    | FLJ44379     | -3.434 | PREDICTED: Homo sapiens similar to S-100 protein, alpha chain, transcript variant 3 (FLJ44379), mRNA.                              |
| NR_003083.2    | SLC6A10P     | -3.432 | Homo sapiens solute carrier family 6 (neurotransmitter transporter, creatine), member 10 (pseudogene) (SLC6A10P) on chromosome 16. |
| NM_013244.2    | MGAT4C       | -3.429 | Homo sapiens mannosyl (alpha-1,3-)-glycoprotein beta-1,4-N-acetylglucosaminyltransferase, isozyme C (putative) (MGAT4C), mRNA.     |
| NM_002130.6    | HMGCS1       | -3.410 | Homo sapiens 3-hydroxy-3-methylglutaryl-Coenzyme A synthase 1 (soluble) (HMGCS1), transcript variant 2, mRNA.                      |
| NM_002738.5    | PRKCB1       | -3.405 | Homo sapiens protein kinase C, beta 1 (PRKCB1), transcript variant 2, mRNA.                                                        |
| XM_001724965.1 | LOC100129268 | -3.404 | PREDICTED: Homo sapiens hypothetical protein LOC100129268 (LOC100129268), mRNA.                                                    |
| NM_024749.2    | VASH2        | -3.399 | Homo sapiens vasohibin 2 (VASH2), mRNA.                                                                                            |
| XM_001126803.1 | LOC728185    | -3.391 | PREDICTED: Homo sapiens similar to Gamma-2-syntrophin (G2SYN) (Syntrophin 5) (SYN5) (LOC728185), mRNA.                             |
| NM_021992.2    | TMSB15A      | -3.388 | Homo sapiens thymosin beta 15a (TMSB15A), mRNA.                                                                                    |
| NM_007223.1    | GPR176       | -3.377 | Homo sapiens G protein-coupled receptor 176 (GPR176), mRNA.                                                                        |

|                |              |        |                                                                                                                                |
|----------------|--------------|--------|--------------------------------------------------------------------------------------------------------------------------------|
| XM_001128032.1 | MGC87042     | -3.369 | PREDICTED: Homo sapiens similar to Six transmembrane epithelial antigen of prostate (MGC87042), mRNA.                          |
| NM_000814.4    | GABRB3       | -3.361 | Homo sapiens gamma-aminobutyric acid (GABA) A receptor, beta 3 (GABRB3), transcript variant 1, mRNA.                           |
| NM_198545.3    | C1orf187     | -3.357 | Homo sapiens chromosome 1 open reading frame 187 (C1orf187), mRNA.                                                             |
| NM_018189.3    | DPPA4        | -3.346 | Homo sapiens developmental pluripotency associated 4 (DPPA4), mRNA.                                                            |
| NM_014618.2    | DBC1         | -3.339 | Homo sapiens deleted in bladder cancer 1 (DBC1), mRNA.                                                                         |
| NM_013244.2    | MGAT4C       | -3.334 | Homo sapiens mannosyl (alpha-1,3-)-glycoprotein beta-1,4-N-acetylglucosaminyltransferase, isozyme C (putative) (MGAT4C), mRNA. |
| XR_079546.1    | MGC11082     | -3.337 | PREDICTED: Homo sapiens hypothetical LOC84777 (MGC11082), miscRNA.                                                             |
| NM_006892.3    | DNMT3B       | -3.333 | Homo sapiens DNA (cytosine-5-)-methyltransferase 3 beta (DNMT3B), transcript variant 1, mRNA.                                  |
| NM_005769.1    | CHST4        | -3.329 | Homo sapiens carbohydrate (N-acetylglucosamine 6-O) sulfotransferase 4 (CHST4), mRNA.                                          |
| NM_152280.2    | SYT11        | -3.327 | Homo sapiens synaptotagmin XI (SYT11), mRNA.                                                                                   |
| NM_003121.2    | SPIB         | -3.325 | Homo sapiens Spi-B transcription factor (Spi-1/PU.1 related) (SPIB), mRNA.                                                     |
| NM_032505.1    | KBTBD8       | -3.314 | Homo sapiens kelch repeat and BTB (POZ) domain containing 8 (KBTBD8), mRNA.                                                    |
| NM_205833.1    | IGSF1        | -3.298 | Homo sapiens immunoglobulin superfamily, member 1 (IGSF1), transcript variant 1, mRNA.                                         |
| NM_006000.1    | TUBA4A       | -3.291 | Homo sapiens tubulin, alpha 4a (TUBA4A), mRNA.                                                                                 |
| XR_000901.1    | FLJ33996     | -3.280 | PREDICTED: Homo sapiens hypothetical protein FLJ33996 (FLJ33996), misc RNA.                                                    |
| NM_012247.3    | SEPHS1       | -3.279 | Homo sapiens selenophosphate synthetase 1 (SEPHS1), mRNA.                                                                      |
| NM_020742.2    | NLGN4X       | -3.273 | Homo sapiens neuroligin 4, X-linked (NLGN4X), transcript variant 1, mRNA.                                                      |
| NM_002463.1    | MX2          | -3.264 | Homo sapiens myxovirus (influenza virus) resistance 2 (mouse) (MX2), mRNA.                                                     |
| XM_001726827.1 | LOC100134361 | -3.254 | PREDICTED: Homo sapiens similar to hCG1811002 (LOC100134361), mRNA.                                                            |
| NM_144698.2    | ANKRD35      | -3.245 | Homo sapiens ankyrin repeat domain 35 (ANKRD35), mRNA.                                                                         |
| NM_001039948.2 | SGSM1        | -3.237 | Homo sapiens small G protein signaling modulator 1 (SGSM1), transcript variant 1, mRNA.                                        |
| NM_019035.2    | PCDH18       | -3.234 | Homo sapiens protocadherin 18 (PCDH18), mRNA.                                                                                  |
| NM_017489.1    | TERF1        | -3.232 | Homo sapiens telomeric repeat binding factor (NIMA-interacting) 1 (TERF1), transcript variant 2, mRNA.                         |
| NR_024031.1    | KIAA0114     | -3.225 | Homo sapiens KIAA0114 (KIAA0114), non-coding RNA.                                                                              |
| NM_020692.1    | GALNTL1      | -3.224 | Homo sapiens UDP-N-acetyl-alpha-D-galactosamine:polypeptide N-acetylgalactosaminyltransferase-like 1 (GALNTL1), mRNA.          |
| NM_021808.2    | GALNT9       | -3.214 | Homo sapiens UDP-N-acetyl-alpha-D-galactosamine:polypeptide N-acetylgalactosaminyltransferase 9 (GalNAc-T9) (GALNT9), mRNA.    |
| NM_004336.2    | BUB1         | -3.208 | Homo sapiens BUB1 budding uninhibited by benzimidazoles 1 homolog (yeast) (BUB1), mRNA.                                        |
| NM_000196.3    | HSD11B2      | -3.201 | Homo sapiens hydroxysteroid (11-beta) dehydrogenase 2 (HSD11B2), mRNA.                                                         |
| NM_003112.3    | SP4          | -3.197 | Homo sapiens Sp4 transcription factor (SP4), mRNA.                                                                             |
| XR_038551.1    | LOC389873    | -3.197 | PREDICTED: Homo sapiens misc_RNA (LOC389873), miscRNA.                                                                         |
| NM_015253.1    | WSCD1        | -3.180 | Homo sapiens WSC domain containing 1 (WSCD1), mRNA.                                                                            |
| NM_080872.1    | UNC5D        | -3.170 | Homo sapiens unc-5 homolog D (C. elegans) (UNC5D), mRNA.                                                                       |
| NM_212535.2    | PRKCB        | -3.170 | Homo sapiens protein kinase C, beta 1 (PRKCB1), transcript variant 2, mRNA.                                                    |
| NM_015568.2    | PPP1R16B     | -3.166 | Homo sapiens protein phosphatase 1, regulatory (inhibitor) subunit 16B (PPP1R16B), mRNA.                                       |
| NM_014790.3    | JAKMIP2      | -3.162 | Homo sapiens janus kinase and microtubule interacting protein 2 (JAKMIP2), mRNA.                                               |



|                |          |        |                                                                                                                                                          |
|----------------|----------|--------|----------------------------------------------------------------------------------------------------------------------------------------------------------|
| NM_005193.1    | CDX4     | -3.162 | Homo sapiens caudal type homeobox 4 (CDX4), mRNA.                                                                                                        |
| NM_152359.1    | CPT1C    | -3.160 | Homo sapiens carnitine palmitoyltransferase 1C (CPT1C), transcript variant 2, mRNA.                                                                      |
| NM_006174.2    | NPY5R    | -3.157 | Homo sapiens neuropeptide Y receptor Y5 (NPY5R), mRNA.                                                                                                   |
| NM_001018109.1 | PIR      | -3.150 | Homo sapiens pirin (iron-binding nuclear protein) (PIR), transcript variant 2, mRNA.                                                                     |
| NM_018977.2    | NLGN3    | -3.136 | Homo sapiens neuroligin 3 (NLGN3), mRNA.                                                                                                                 |
| NM_001008273.1 | TAGLN3   | -3.131 | Homo sapiens transgelin 3 (TAGLN3), transcript variant 3, mRNA.                                                                                          |
| NM_002600.3    | PDE4B    | -3.126 | Homo sapiens phosphodiesterase 4B, cAMP-specific (phosphodiesterase E4 dunce homolog, Drosophila) (PDE4B), transcript variant a, mRNA.                   |
| NM_004181.3    | UCHL1    | -3.114 | Homo sapiens ubiquitin carboxyl-terminal esterase L1 (ubiquitin thiolesterase) (UCHL1), mRNA.                                                            |
| NM_174976.2    | ZDHHC22  | -3.110 | Homo sapiens zinc finger, DHHC-type containing 22 (ZDHHC22), mRNA.                                                                                       |
| NM_003360.2    | UGT8     | -3.102 | Homo sapiens UDP glycosyltransferase 8 (UDP-galactose ceramide galactosyltransferase) (UGT8), mRNA.                                                      |
| NM_033222.2    | PSIP1    | -3.098 | Homo sapiens PC4 and SFRS1 interacting protein 1 (PSIP1), transcript variant 2, mRNA.                                                                    |
| NM_001040167.1 | LFNG     | -3.097 | Homo sapiens LFNG O-fucosylpeptide 3-beta-N-acetylglucosaminyltransferase (LFNG), transcript variant 1, mRNA.                                            |
| NM_001555.2    | IGSF1    | -3.086 | Homo sapiens immunoglobulin superfamily, member 1 (IGSF1), transcript variant 1, mRNA.                                                                   |
| NM_005110.1    | GFPT2    | -3.086 | Homo sapiens glutamine-fructose-6-phosphate transaminase 2 (GFPT2), mRNA.                                                                                |
| NM_004946.1    | DOCK2    | -3.084 | Homo sapiens dedicator of cytokinesis 2 (DOCK2), mRNA.                                                                                                   |
| NM_152999.2    | STEAP2   | -3.082 | Homo sapiens six transmembrane epithelial antigen of the prostate 2 (STEAP2), mRNA.                                                                      |
| NM_198336.1    | INSIG1   | -3.076 | Homo sapiens insulin induced gene 1 (INSIG1), transcript variant 2, mRNA.                                                                                |
| NM_021127.1    | PMAIP1   | -3.074 | Homo sapiens phorbol-12-myristate-13-acetate-induced protein 1 (PMAIP1), mRNA.                                                                           |
| NM_005378.4    | MYCN     | -3.074 | Homo sapiens v-myc myelocytomatosis viral related oncogene, neuroblastoma derived (avian) (MYCN), mRNA.                                                  |
| NM_006426.1    | DPYSL4   | -3.073 | Homo sapiens dihydropyrimidinase-like 4 (DPYSL4), mRNA.                                                                                                  |
| NM_152889.1    | CHST13   | -3.067 | Homo sapiens carbohydrate (chondroitin 4) sulfotransferase 13 (CHST13), mRNA.                                                                            |
| NM_005440.3    | RND2     | -3.064 | Homo sapiens Rho family GTPase 2 (RND2), mRNA.                                                                                                           |
| NM_005378.4    | MYCN     | -3.056 | Homo sapiens v-myc myelocytomatosis viral related oncogene, neuroblastoma derived (avian) (MYCN), mRNA.                                                  |
| NM_024629.2    | MLF1IP   | -3.047 | Homo sapiens MLF1 interacting protein (MLF1IP), mRNA.                                                                                                    |
| NM_207406.2    | BEND4    | -3.047 | Homo sapiens BEN domain containing 4 (BEND4), mRNA.                                                                                                      |
| NM_213647.1    | FGFR4    | -3.046 | Homo sapiens fibroblast growth factor receptor 4 (FGFR4), transcript variant 3, mRNA.                                                                    |
| NM_198545.2    | C1orf187 | -3.044 | Homo sapiens chromosome 1 open reading frame 187 (C1orf187), mRNA.                                                                                       |
| NM_030631.2    | SLC25A21 | -3.040 | Homo sapiens solute carrier family 25 (mitochondrial oxodicarboxylate carrier), member 21 (SLC25A21), nuclear gene encoding mitochondrial protein, mRNA. |
| NM_006286.1    | TFDP2    | -3.034 | Homo sapiens transcription factor Dp-2 (E2F dimerization partner 2) (TFDP2), mRNA.                                                                       |
| NM_024865.1    | NANOG    | -3.033 | Homo sapiens Nanog homeobox (NANOG), mRNA.                                                                                                               |
| NM_012449.2    | STEAP1   | -3.015 | Homo sapiens six transmembrane epithelial antigen of the prostate 1 (STEAP1), mRNA.                                                                      |
| NM_001080450.1 | BEND3    | -3.014 | Homo sapiens BEN domain containing 3 (BEND3), mRNA.                                                                                                      |
| NM_182974.2    | GLT6D1   | -3.013 | Homo sapiens glycosyltransferase 6 domain containing 1 (GLT6D1), mRNA.                                                                                   |
| NM_019886.2    | CHST7    | -3.007 | Homo sapiens carbohydrate (N-acetylglucosamine 6-O) sulfotransferase 7                                                                                   |

|                |              |        |                                                                                                                                            |
|----------------|--------------|--------|--------------------------------------------------------------------------------------------------------------------------------------------|
|                |              |        | (CHST7), mRNA.                                                                                                                             |
| NM_002045.2    | GAP43        | -3.001 | Homo sapiens growth associated protein 43 (GAP43), mRNA.                                                                                   |
| NM_182830.2    | MDGA2        | -2.994 | Homo sapiens MAM domain containing glycosylphosphatidylinositol anchor 2 (MDGA2), mRNA.                                                    |
| NM_152322.2    | BTBD11       | -2.992 | Homo sapiens BTB (POZ) domain containing 11 (BTBD11), transcript variant 1, mRNA.                                                          |
| NM_004615.2    | TSPAN7       | -2.986 | Homo sapiens tetraspanin 7 (TSPAN7), mRNA.                                                                                                 |
| NM_033201.1    | C16orf45     | -2.978 | Homo sapiens chromosome 16 open reading frame 45 (C16orf45), mRNA.                                                                         |
| NM_018645.3    | HES6         | -2.977 | Homo sapiens hairy and enhancer of split 6 (Drosophila) (HES6), mRNA.                                                                      |
| NM_015225.1    | KIAA0367     | -2.975 | Homo sapiens KIAA0367 (KIAA0367), mRNA.                                                                                                    |
| NM_017954.9    | CADPS2       | -2.975 | Homo sapiens Ca <sup>++</sup> -dependent secretion activator 2 (CADPS2), transcript variant 1, mRNA.                                       |
| NM_012083.2    | FRAT2        | -2.973 | Homo sapiens frequently rearranged in advanced T-cell lymphomas 2 (FRAT2), mRNA.                                                           |
| NM_014431.1    | KIAA1274     | -2.970 | Homo sapiens KIAA1274 (KIAA1274), mRNA.                                                                                                    |
| NM_032882.2    | PNMA6A       | -2.964 | Homo sapiens paraneoplastic antigen like 6A (PNMA6A), mRNA.                                                                                |
| NM_000745.2    | CHRNA5       | -2.959 | Homo sapiens cholinergic receptor, nicotinic, alpha 5 (CHRNA5), mRNA.                                                                      |
| NM_014932.2    | NLGN1        | -2.943 | Homo sapiens neuroligin 1 (NLGN1), mRNA.                                                                                                   |
| NM_000814.4    | GABRB3       | -2.940 | Homo sapiens gamma-aminobutyric acid (GABA) A receptor, beta 3 (GABRB3), transcript variant 1, mRNA.                                       |
| NM_005329.2    | HAS3         | -2.939 | Homo sapiens hyaluronan synthase 3 (HAS3), transcript variant 1, mRNA.                                                                     |
| XM_001725504.1 | LOC100127971 | -2.938 | PREDICTED: Homo sapiens hypothetical protein LOC100127971 (LOC100127971), mRNA.                                                            |
| XR_039217.1    | LOC100130769 | -2.936 | PREDICTED: Homo sapiens misc_RNA (LOC100130769), miscRNA.                                                                                  |
| NM_001814.2    | CTSC         | -2.935 | Homo sapiens cathepsin C (CTSC), transcript variant 1, mRNA.                                                                               |
| NM_004497.2    | FOXA3        | -2.934 | Homo sapiens forkhead box A3 (FOXA3), mRNA.                                                                                                |
| NM_024534.4    | FLJ12684     | -2.931 | Homo sapiens hypothetical protein FLJ12684 (FLJ12684), mRNA. XR_001254                                                                     |
| NM_199478.1    | PLP1         | -2.928 | Homo sapiens proteolipid protein 1 (PLP1), transcript variant 2, mRNA.                                                                     |
| NM_024645.2    | ZMAT4        | -2.922 | Homo sapiens zinc finger, matrin type 4 (ZMAT4), transcript variant 1, mRNA.                                                               |
| NM_014906.3    | PPM1E        | -2.917 | Homo sapiens protein phosphatase 1E (PP2C domain containing) (PPM1E), mRNA.                                                                |
| NM_024333.1    | FSD1         | -2.913 | Homo sapiens fibronectin type III and SPRY domain containing 1 (FSD1), mRNA.                                                               |
| NM_000903.2    | NQO1         | -2.913 | Homo sapiens NAD(P)H dehydrogenase, quinone 1 (NQO1), transcript variant 1, mRNA.                                                          |
| NM_001039111.1 | TRIM71       | -2.912 | Homo sapiens tripartite motif-containing 71 (TRIM71), mRNA.                                                                                |
| NM_001814.2    | CTSC         | -2.911 | Homo sapiens cathepsin C (CTSC), transcript variant 1, mRNA.                                                                               |
| NM_017711.2    | GDPD2        | -2.906 | Homo sapiens glycerophosphodiester phosphodiesterase domain containing 2 (GDPD2), mRNA.                                                    |
| NM_133474.2    | ZNF721       | -2.903 | Homo sapiens zinc finger protein 721 (ZNF721), mRNA.                                                                                       |
| NM_018659.2    | CYTL1        | -2.901 | Homo sapiens cytokine-like 1 (CYTL1), mRNA.                                                                                                |
| NM_178562.2    | TSPAN33      | -2.891 | Homo sapiens tetraspanin 33 (TSPAN33), mRNA.                                                                                               |
| NM_005891.2    | ACAT2        | -2.890 | Homo sapiens acetyl-Coenzyme A acetyltransferase 2 (ACAT2), mRNA.                                                                          |
| NM_001097635.1 | GCNT1        | -2.887 | Homo sapiens glucosaminyl (N-acetyl) transferase 1, core 2 (beta-1,6-N-acetylglucosaminyltransferase) (GCNT1), transcript variant 4, mRNA. |
| NM_004297.2    | GNA14        | -2.886 | Homo sapiens guanine nucleotide binding protein (G protein), alpha 14 (GNA14), mRNA.                                                       |
| XR_037397.1    | LOC100129267 | -2.881 | PREDICTED: Homo sapiens misc_RNA (LOC100129267), miscRNA.                                                                                  |
| NM_153034.2    | ZNF488       | -2.879 | Homo sapiens zinc finger protein 488 (ZNF488), mRNA.                                                                                       |

|                |           |        |                                                                                                                                                                                                                                                |
|----------------|-----------|--------|------------------------------------------------------------------------------------------------------------------------------------------------------------------------------------------------------------------------------------------------|
| NM_017669.2    | ERCC6L    | -2.871 | Homo sapiens excision repair cross-complementing rodent repair deficiency, complementation group 6-like (ERCC6L), mRNA.                                                                                                                        |
| XM_497029.2    | LOC441408 | -2.871 | PREDICTED: Homo sapiens hypothetical LOC441408, transcript variant 1 (LOC441408), mRNA.                                                                                                                                                        |
| XM_372255.2    | LOC389895 | -2.870 | PREDICTED: Homo sapiens similar to CG4768-PA (LOC389895), mRNA.                                                                                                                                                                                |
| NM_022357.1    | DPEP3     | -2.866 | Homo sapiens dipeptidase 3 (DPEP3), mRNA.                                                                                                                                                                                                      |
| NM_182553.1    | CNIH2     | -2.865 | Homo sapiens cornichon homolog 2 (Drosophila) (CNIH2), mRNA.                                                                                                                                                                                   |
| NM_182970.2    | RIMS4     | -2.861 | Homo sapiens regulating synaptic membrane exocytosis 4 (RIMS4), mRNA.                                                                                                                                                                          |
| NM_173078.2    | SLITRK4   | -2.858 | Homo sapiens SLIT and NTRK-like family, member 4 (SLITRK4), mRNA.                                                                                                                                                                              |
| NM_005760.2    | CEBPZ     | -2.847 | Homo sapiens CCAAT/enhancer binding protein (C/EBP), zeta (CEBPZ), mRNA.                                                                                                                                                                       |
| NM_152999.3    | STEAP2    | -2.846 | Homo sapiens six transmembrane epithelial antigen of the prostate 2 (STEAP2), mRNA.                                                                                                                                                            |
| NM_001018054.1 | LRP8      | -2.842 | Homo sapiens low density lipoprotein receptor-related protein 8, apolipoprotein e receptor (LRP8), transcript variant 4, mRNA.                                                                                                                 |
| NM_018169.2    | C12orf35  | -2.841 | Homo sapiens chromosome 12 open reading frame 35 (C12orf35), mRNA.                                                                                                                                                                             |
| NM_015028.1    | TNIK      | -2.839 | Homo sapiens TRAF2 and NCK interacting kinase (TNIK), mRNA.                                                                                                                                                                                    |
| NM_021615.4    | CHST6     | -2.838 | Homo sapiens carbohydrate (N-acetylglucosamine 6-O) sulfotransferase 6 (CHST6), mRNA.                                                                                                                                                          |
| NM_001078174.1 | SLC29A1   | -2.833 | Homo sapiens solute carrier family 29 (nucleoside transporters), member 1 (SLC29A1), nuclear gene encoding mitochondrial protein, transcript variant 4, mRNA.                                                                                  |
| NM_017745.4    | BCOR      | -2.829 | Homo sapiens BCL6 co-repressor (BCOR), transcript variant 1, mRNA.                                                                                                                                                                             |
| NM_004664.2    | LIN7A     | -2.828 | Homo sapiens lin-7 homolog A (C. elegans) (LIN7A), mRNA.                                                                                                                                                                                       |
| NM_198353.1    | KCTD8     | -2.828 | Homo sapiens potassium channel tetramerisation domain containing 8 (KCTD8), mRNA.                                                                                                                                                              |
| NM_015162.3    | ACSBG1    | -2.826 | Homo sapiens acyl-CoA synthetase bubblegum family member 1 (ACSBG1), mRNA.                                                                                                                                                                     |
| NM_004378.1    | CRABP1    | -2.824 | Homo sapiens cellular retinoic acid binding protein 1 (CRABP1), mRNA.                                                                                                                                                                          |
| NM_005375.2    | MYB       | -2.823 | Homo sapiens v-myb myeloblastosis viral oncogene homolog (avian) (MYB), transcript variant 2, mRNA.                                                                                                                                            |
| NM_016582.1    | SLC15A3   | -2.820 | Homo sapiens solute carrier family 15, member 3 (SLC15A3), mRNA.                                                                                                                                                                               |
| NM_001004196.2 | CD200     | -2.818 | Homo sapiens CD200 molecule (CD200), transcript variant 2, mRNA.                                                                                                                                                                               |
| NM_001031806.1 | ALDH3A2   | -2.817 | Homo sapiens aldehyde dehydrogenase 3 family, member A2 (ALDH3A2), transcript variant 2, mRNA.                                                                                                                                                 |
| NM_006288.2    | THY1      | -2.814 | Homo sapiens Thy-1 cell surface antigen (THY1), mRNA.                                                                                                                                                                                          |
| NM_024595.1    | AKIRIN1   | -2.810 | Homo sapiens akirin 1 (AKIRIN1), mRNA.                                                                                                                                                                                                         |
| NM_170678.2    | ITGB1BP3  | -2.805 | Homo sapiens integrin beta 1 binding protein 3 (ITGB1BP3), mRNA.                                                                                                                                                                               |
| XM_929774.2    | LOC646817 | -2.800 | PREDICTED: Homo sapiens similar to Protein SET (Phosphatase 2A inhibitor I2PP2A) (I-2PP2A) (Template-activating factor I) (TAF-I) (HLA-DR-associated protein II) (PHAPII) (Inhibitor of granzyme A-activated DNase) (IGAAD) (LOC646817), mRNA. |
| NM_014921.3    | LPHN1     | -2.798 | Homo sapiens latrophilin 1 (LPHN1), transcript variant 2, mRNA.                                                                                                                                                                                |
| NM_013264.2    | DDX25     | -2.791 | Homo sapiens DEAD (Asp-Glu-Ala-Asp) box polypeptide 25 (DDX25), mRNA.                                                                                                                                                                          |
| NM_020925.2    | CACHD1    | -2.790 | Homo sapiens cache domain containing 1 (CACHD1), mRNA.                                                                                                                                                                                         |
| NM_003716.2    | CADPS     | -2.790 | Homo sapiens Ca <sup>2+</sup> -dependent secretion activator (CADPS), transcript variant 1, mRNA.                                                                                                                                              |
| NM_000530.3    | MPZ       | -2.781 | Homo sapiens myelin protein zero (Charcot-Marie-Tooth neuropathy 1B) (MPZ), mRNA.                                                                                                                                                              |
| NM_022468.4    | MMP25     | -2.780 | Homo sapiens matrix metalloproteinase 25 (MMP25), mRNA.                                                                                                                                                                                        |
| NM_012247.3    | SEPHS1    | -2.773 | Homo sapiens selenophosphate synthetase 1 (SEPHS1), mRNA.                                                                                                                                                                                      |

|                |              |        |                                                                                                                                                               |
|----------------|--------------|--------|---------------------------------------------------------------------------------------------------------------------------------------------------------------|
| NM_000904.2    | NQO2         | -2.770 | Homo sapiens NAD(P)H dehydrogenase, quinone 2 (NQO2), mRNA.                                                                                                   |
| NM_020742.2    | NLGN4X       | -2.763 | Homo sapiens neuroligin 4, X-linked (NLGN4X), transcript variant 1, mRNA.                                                                                     |
| NM_001017430.1 | RBM3         | -2.762 | Homo sapiens RNA binding motif (RNP1, RRM) protein 3 (RBM3), transcript variant 2, mRNA.                                                                      |
| NM_016089.2    | ZNF589       | -2.762 | Homo sapiens zinc finger protein 589 (ZNF589), mRNA.                                                                                                          |
| NM_001360.1    | DHCR7        | -2.757 | Homo sapiens 7-dehydrocholesterol reductase (DHCR7), mRNA.                                                                                                    |
| NM_000995.2    | RPL34        | -2.753 | Homo sapiens ribosomal protein L34 (RPL34), transcript variant 1, mRNA.                                                                                       |
| NM_001360.2    | DHCR7        | -2.749 | Homo sapiens 7-dehydrocholesterol reductase (DHCR7), mRNA.                                                                                                    |
| NM_006739.3    | MCM5         | -2.746 | Homo sapiens minichromosome maintenance complex component 5 (MCM5), mRNA.                                                                                     |
| XR_041527.1    | ZNF788       | -2.742 | PREDICTED: Homo sapiens misc_RNA (ZNF788), miscRNA.                                                                                                           |
| NM_017549.3    | EPDR1        | -2.740 | Homo sapiens ependymin related protein 1 (zebrafish) (EPDR1), mRNA.                                                                                           |
| NM_021614.2    | KCNN2        | -2.736 | Homo sapiens potassium intermediate/small conductance calcium-activated channel, subfamily N, member 2 (KCNN2), transcript variant 1, mRNA.                   |
| XM_001720872.1 | LOC100127971 | -2.730 | PREDICTED: Homo sapiens hypothetical protein LOC100127971 (LOC100127971), mRNA.                                                                               |
| BC038245       |              | -2.729 | Homo sapiens, clone IMAGE:5241654, mRNA                                                                                                                       |
| NM_145018.2    | C11orf82     | -2.721 | Homo sapiens chromosome 11 open reading frame 82 (C11orf82), mRNA.                                                                                            |
| NM_005678.3    | SNURF        | -2.711 | Homo sapiens SNRPN upstream reading frame (SNURF), transcript variant 1, mRNA.                                                                                |
| NM_058237.1    | PPP4R4       | -2.703 | Homo sapiens protein phosphatase 4, regulatory subunit 4 (PPP4R4), transcript variant 1, mRNA.                                                                |
| XM_001715544.1 | LOC100129673 | -2.700 | PREDICTED: Homo sapiens similar to hCG2042915 (LOC100129673), mRNA.                                                                                           |
| NM_019106.4    | SEPT3        | -2.699 | Homo sapiens septin 3 (SEPT3), transcript variant B, mRNA.                                                                                                    |
| NM_006892.3    | DNMT3B       | -2.699 | Homo sapiens DNA (cytosine-5-)-methyltransferase 3 beta (DNMT3B), transcript variant 1, mRNA.                                                                 |
| NM_152312.3    | GYLTL1B      | -2.697 | Homo sapiens glycosyltransferase-like 1B (GYLTL1B), mRNA.                                                                                                     |
| NM_018644.3    | B3GAT1       | -2.697 | Homo sapiens beta-1,3-glucuronyltransferase 1 (glucuronosyltransferase P) (B3GAT1), transcript variant 1, mRNA.                                               |
| NM_152672.4    | OSTalpha     | -2.694 | Homo sapiens organic solute transporter alpha (OSTalpha), mRNA.                                                                                               |
| NM_012113.1    | CA14         | -2.693 | Homo sapiens carbonic anhydrase XIV (CA14), mRNA.                                                                                                             |
| NM_000382.2    | ALDH3A2      | -2.690 | Homo sapiens aldehyde dehydrogenase 3 family, member A2 (ALDH3A2), transcript variant 2, mRNA.                                                                |
| NM_207406.1    | CCDC4        | -2.690 | Homo sapiens coiled-coil domain containing 4 (CCDC4), mRNA.                                                                                                   |
| NM_153183.1    | NUDT10       | -2.682 | Homo sapiens nudix (nucleoside diphosphate linked moiety X)-type motif 10 (NUDT10), mRNA.                                                                     |
| NM_001048201.1 | UHRF1        | -2.679 | Homo sapiens ubiquitin-like with PHD and ring finger domains 1 (UHRF1), transcript variant 1, mRNA.                                                           |
| NM_030639.1    | BHLHB9       | -2.679 | Homo sapiens basic helix-loop-helix domain containing, class B, 9 (BHLHB9), mRNA.                                                                             |
| NM_001078174.1 | SLC29A1      | -2.676 | Homo sapiens solute carrier family 29 (nucleoside transporters), member 1 (SLC29A1), nuclear gene encoding mitochondrial protein, transcript variant 4, mRNA. |
| NM_153183.2    | NUDT10       | -2.675 | Homo sapiens nudix (nucleoside diphosphate linked moiety X)-type motif 10 (NUDT10), mRNA.                                                                     |
| NM_001015001.1 | CKMT1A       | -2.674 | Homo sapiens creatine kinase, mitochondrial 1A (CKMT1A), nuclear gene encoding mitochondrial protein, mRNA.                                                   |
| NM_022449.1    | RAB17        | -2.674 | Homo sapiens RAB17, member RAS oncogene family (RAB17), mRNA.                                                                                                 |
| NM_018365.1    | MNS1         | -2.674 | Homo sapiens meiosis-specific nuclear structural 1 (MNS1), mRNA.                                                                                              |
| NM_000399.2    | EGR2         | -2.669 | Homo sapiens early growth response 2 (Krox-20 homolog, Drosophila) (EGR2), mRNA.                                                                              |

|                |          |        |                                                                                                                   |
|----------------|----------|--------|-------------------------------------------------------------------------------------------------------------------|
| NM_024719.2    | GRTP1    | -2.669 | Homo sapiens growth hormone regulated TBC protein 1 (GRTP1), mRNA.                                                |
| NM_000170.2    | GLDC     | -2.663 | Homo sapiens glycine dehydrogenase (decarboxylating) (GLDC), mRNA.                                                |
| NM_001441.1    | FAAH     | -2.663 | Homo sapiens fatty acid amide hydrolase (FAAH), mRNA.                                                             |
| NM_024693.2    | ECHDC3   | -2.662 | Homo sapiens enoyl Coenzyme A hydratase domain containing 3 (ECHDC3), mRNA.                                       |
| NM_003385.4    | VSNL1    | -2.662 | Homo sapiens visinin-like 1 (VSNL1), mRNA.                                                                        |
| NM_006286.1    | TFDP2    | -2.661 | Homo sapiens transcription factor Dp-2 (E2F dimerization partner 2) (TFDP2), mRNA.                                |
| NM_004319.1    | ASTN1    | -2.660 | Homo sapiens astrotactin 1 (ASTN1), transcript variant 1, mRNA.                                                   |
| NM_138375.1    | CABLES1  | -2.656 | Homo sapiens Cdk5 and Abl enzyme substrate 1 (CABLES1), transcript variant 1, mRNA.                               |
| NM_001104.1    | ACTN3    | -2.652 | Homo sapiens actinin, alpha 3 (ACTN3), mRNA.                                                                      |
| NM_152649.1    | MLKL     | -2.651 | Homo sapiens mixed lineage kinase domain-like (MLKL), mRNA.                                                       |
| NM_145006.2    | SUSD3    | -2.648 | Homo sapiens sushi domain containing 3 (SUSD3), mRNA.                                                             |
| NM_032488.2    | CNFN     | -2.644 | Homo sapiens cornifelin (CNFN), mRNA.                                                                             |
| NM_138576.2    | BCL11B   | -2.642 | Homo sapiens B-cell CLL/lymphoma 11B (zinc finger protein) (BCL11B), transcript variant 1, mRNA.                  |
| NM_138409.1    | C6orf117 | -2.638 | Homo sapiens chromosome 6 open reading frame 117 (C6orf117), mRNA.                                                |
| NM_198336.1    | INSIG1   | -2.636 | Homo sapiens insulin induced gene 1 (INSIG1), transcript variant 2, mRNA.                                         |
| NM_139354.2    | MATK     | -2.631 | Homo sapiens megakaryocyte-associated tyrosine kinase (MATK), transcript variant 3, mRNA.                         |
| NM_033259.2    | CAMK2N2  | -2.632 | Homo sapiens calcium/calmodulin-dependent protein kinase II inhibitor 2 (CAMK2N2), mRNA.                          |
| NM_000459.2    | TEK      | -2.620 | Homo sapiens TEK tyrosine kinase, endothelial (venous malformations, multiple cutaneous and mucosal) (TEK), mRNA. |
| NM_018644.3    | B3GAT1   | -2.619 | Homo sapiens beta-1,3-glucuronyltransferase 1 (glucuronosyltransferase P) (B3GAT1), transcript variant 1, mRNA.   |
| NM_019079.2    | L1TD1    | -2.616 | Homo sapiens LINE-1 type transposase domain containing 1 (L1TD1), mRNA.                                           |
| NM_024794.1    | ABHD9    | -2.612 | Homo sapiens abhydrolase domain containing 9 (ABHD9), mRNA.                                                       |
| NM_014750.3    | DLGAP5   | -2.609 | Homo sapiens discs, large (Drosophila) homolog-associated protein 5 (DLGAP5), mRNA.                               |
| NM_080878.2    | ITLN2    | -2.607 | Homo sapiens intelectin 2 (ITLN2), mRNA.                                                                          |
| NM_006087.2    | TUBB4    | -2.602 | Homo sapiens tubulin, beta 4 (TUBB4), mRNA.                                                                       |
| NM_005824.1    | LRRC17   | -2.594 | Homo sapiens leucine rich repeat containing 17 (LRRC17), transcript variant 2, mRNA.                              |
| NM_020436.2    | SALL4    | -2.594 | Homo sapiens sal-like 4 (Drosophila) (SALL4), mRNA.                                                               |
| NM_152429.3    | FGFBP3   | -2.593 | Homo sapiens fibroblast growth factor binding protein 3 (FGFBP3), mRNA.                                           |
| NM_022806.2    | SNRPN    | -2.592 | Homo sapiens small nuclear ribonucleoprotein polypeptide N (SNRPN), transcript variant 3, mRNA.                   |
| NM_020836.2    | BEGAIN   | -2.591 | Homo sapiens brain-enriched guanylate kinase-associated homolog (rat) (BEGAIN), mRNA.                             |
| CR738291       |          | -2.586 | CR738291 Homo sapiens library (Ebert L) Homo sapiens cDNA clone IMAgp971D2453 ; IMAGE:811744 5, mRNA sequence     |
| NM_003385.4    | VSNL1    | -2.586 | Homo sapiens visinin-like 1 (VSNL1), mRNA.                                                                        |
| NM_001011645.1 | AR       | -2.585 | Homo sapiens androgen receptor (AR), transcript variant 2, mRNA.                                                  |
| NM_144584.1    | C1orf59  | -2.583 | Homo sapiens chromosome 1 open reading frame 59 (C1orf59), mRNA.                                                  |
| CR603272       |          | -2.578 | full-length cDNA clone CS0DC013Y110 of Neuroblastoma Cot 25-normalized of Homo sapiens (human)                    |
| NM_007115.2    | TNFAIP6  | -2.577 | Homo sapiens tumor necrosis factor, alpha-induced protein 6 (TNFAIP6), mRNA.                                      |

|                |           |        |                                                                                                                              |
|----------------|-----------|--------|------------------------------------------------------------------------------------------------------------------------------|
| NM_015678.3    | NBEA      | -2.575 | Homo sapiens neurobeachin (NBEA), mRNA.                                                                                      |
| NR_015379.2    | UCA1      | -2.575 | Homo sapiens urothelial cancer associated 1 (non-protein coding) (UCA1), non-coding RNA.                                     |
| NM_007280.1    | OIP5      | -2.568 | Homo sapiens Opa interacting protein 5 (OIP5), mRNA.                                                                         |
| NM_012202.1    | GNG3      | -2.567 | Homo sapiens guanine nucleotide binding protein (G protein), gamma 3 (GNG3), mRNA.                                           |
| NM_014696.2    | KIAA0514  | -2.564 | Homo sapiens KIAA0514 (KIAA0514), mRNA.                                                                                      |
| NM_144575.2    | CAPN13    | -2.564 | Homo sapiens calpain 13 (CAPN13), mRNA.                                                                                      |
| NM_000459.1    | TEK       | -2.561 | Homo sapiens TEK tyrosine kinase, endothelial (venous malformations, multiple cutaneous and mucosal) (TEK), mRNA.            |
| NM_005269.1    | GLI1      | -2.551 | Homo sapiens glioma-associated oncogene homolog 1 (zinc finger protein) (GLI1), mRNA.                                        |
| NM_002482.2    | NASP      | -2.550 | Homo sapiens nuclear autoantigenic sperm protein (histone-binding) (NASP), transcript variant 2, mRNA.                       |
| NM_016447.2    | MPP6      | -2.548 | Homo sapiens membrane protein, palmitoylated 6 (MAGUK p55 subfamily member 6) (MPP6), mRNA.                                  |
| XM_209196.5    | LOC284422 | -2.547 | PREDICTED: Homo sapiens similar to HSPC323 (LOC284422), mRNA.                                                                |
| NM_007280.1    | OIP5      | -2.545 | Homo sapiens Opa interacting protein 5 (OIP5), mRNA.                                                                         |
| NM_018361.2    | AGPAT5    | -2.540 | Homo sapiens 1-acylglycerol-3-phosphate O-acyltransferase 5 (lysophosphatidic acid acyltransferase, epsilon) (AGPAT5), mRNA. |
| NM_138967.2    | SCAMP5    | -2.534 | Homo sapiens secretory carrier membrane protein 5 (SCAMP5), mRNA.                                                            |
| NM_022652.2    | DUSP6     | -2.532 | Homo sapiens dual specificity phosphatase 6 (DUSP6), transcript variant 2, mRNA.                                             |
| NM_003543.3    | HIST1H4H  | -2.531 | Homo sapiens histone cluster 1, H4h (HIST1H4H), mRNA.                                                                        |
| NM_001006625.1 | PDPN      | -2.531 | Homo sapiens podoplanin (PDPN), transcript variant 4, mRNA.                                                                  |
| NM_018719.2    | CDCA7L    | -2.530 | Homo sapiens cell division cycle associated 7-like (CDCA7L), mRNA.                                                           |
| NM_017915.2    | C12orf48  | -2.527 | Homo sapiens chromosome 12 open reading frame 48 (C12orf48), mRNA.                                                           |
| NM_057162.1    | KLHL4     | -2.526 | Homo sapiens kelch-like 4 (Drosophila) (KLHL4), transcript variant 2, mRNA.                                                  |
| NM_198445.2    | RINL      | -2.526 | Homo sapiens Ras and Rab interactor-like (RINL), mRNA.                                                                       |
| NM_018369.1    | DEPDC1B   | -2.525 | Homo sapiens DEP domain containing 1B (DEPDC1B), mRNA.                                                                       |
| XR_041972.1    | C10orf75  | -2.523 | PREDICTED: Homo sapiens misc_RNA (C10orf75), miscRNA.                                                                        |
| NM_006759.3    | UGP2      | -2.523 | Homo sapiens UDP-glucose pyrophosphorylase 2 (UGP2), transcript variant 1, mRNA.                                             |
| NM_014762.3    | DHCR24    | -2.522 | Homo sapiens 24-dehydrocholesterol reductase (DHCR24), mRNA.                                                                 |
| NM_001034954.1 | SORBS1    | -2.521 | Homo sapiens sorbin and SH3 domain containing 1 (SORBS1), transcript variant 3, mRNA.                                        |
| NM_016567.2    | BCCIP     | -2.521 | Homo sapiens BRCA2 and CDKN1A interacting protein (BCCIP), transcript variant A, mRNA.                                       |
| NM_133369.2    | UNC5A     | -2.519 | Homo sapiens unc-5 homolog A (C. elegans) (UNC5A), mRNA.                                                                     |
| NM_145061.3    | C13orf3   | -2.518 | Homo sapiens chromosome 13 open reading frame 3 (C13orf3), mRNA.                                                             |
| NM_006950.3    | SYN1      | -2.517 | Homo sapiens synapsin I (SYN1), transcript variant Ia, mRNA.                                                                 |
| NM_006681.1    | NMU       | -2.515 | Homo sapiens neuromedin U (NMU), mRNA.                                                                                       |
| XM_001134195.2 | LOC147646 | -2.515 | PREDICTED: Homo sapiens hypothetical protein LOC147646 (LOC147646), mRNA.                                                    |
| NM_001002919.1 | LOC285016 | -2.498 | Homo sapiens hypothetical protein LOC285016 (LOC285016), mRNA.                                                               |
| NM_001012978.1 | BEX5      | -2.497 | Homo sapiens brain expressed, X-linked 5 (BEX5), mRNA.                                                                       |
| NM_002119.3    | HLA-DOA   | -2.495 | Homo sapiens major histocompatibility complex, class II, DO alpha (HLA-DOA), mRNA.                                           |
| NM_001099645.1 | RPL22L1   | -2.494 | Homo sapiens ribosomal protein L22-like 1 (RPL22L1), mRNA.                                                                   |

|                |              |        |                                                                                                                                                                  |
|----------------|--------------|--------|------------------------------------------------------------------------------------------------------------------------------------------------------------------|
| NM_018369.1    | DEPDC1B      | -2.489 | Homo sapiens DEP domain containing 1B (DEPDC1B), mRNA.                                                                                                           |
| U56251         |              | -2.485 | Human HeLa mRNA isolated as a false positive in a two-hybrid-screen                                                                                              |
| NM_199478.1    | PLP1         | -2.481 | Homo sapiens proteolipid protein 1 (PLP1), transcript variant 2, mRNA.                                                                                           |
| NM_022805.2    | SNRPN        | -2.477 | Homo sapiens small nuclear ribonucleoprotein polypeptide N (SNRPN), transcript variant 3, mRNA.                                                                  |
| NM_001002844.1 | ZNF280D      | -2.469 | Homo sapiens zinc finger protein 280D (ZNF280D), transcript variant 3, mRNA.                                                                                     |
| XM_933918.1    | LOC646769    | -2.469 | PREDICTED: Homo sapiens hypothetical protein LOC646769 (LOC646769), mRNA.                                                                                        |
| NM_153768.1    | CABYR        | -2.458 | Homo sapiens calcium binding tyrosine-(Y)-phosphorylation regulated (CABYR), transcript variant 2, mRNA.                                                         |
| NM_018063.3    | HELLS        | -2.451 | Homo sapiens helicase, lymphoid-specific (HELLS), mRNA.                                                                                                          |
| NM_012484.1    | HMMR         | -2.441 | Homo sapiens hyaluronan-mediated motility receptor (RHAMM) (HMMR), transcript variant 1, mRNA.                                                                   |
| NM_004448.2    | ERBB2        | -2.438 | Homo sapiens v-erb-b2 erythroblastic leukemia viral oncogene homolog 2, neuro/glioblastoma derived oncogene homolog (avian) (ERBB2), transcript variant 1, mRNA. |
| XM_001723748.1 | LOC100133489 | -2.437 | PREDICTED: Homo sapiens similar to hCG1983233 (LOC100133489), mRNA.                                                                                              |
| NM_004526.2    | MCM2         | -2.425 | Homo sapiens minichromosome maintenance complex component 2 (MCM2), mRNA.                                                                                        |
| NM_022806.2    | SNRPN        | -2.418 | Homo sapiens small nuclear ribonucleoprotein polypeptide N (SNRPN), transcript variant 3, mRNA.                                                                  |
| NM_004426.2    | PHC1         | -2.415 | Homo sapiens polyhomeotic homolog 1 (Drosophila) (PHC1), mRNA.                                                                                                   |
| NM_021190.1    | PTBP2        | -2.402 | Homo sapiens polypyrimidine tract binding protein 2 (PTBP2), mRNA.                                                                                               |
| NM_032776.1    | JMJD1C       | -2.398 | Homo sapiens jumonji domain containing 1C (JMJD1C), transcript variant 1, mRNA.                                                                                  |
| NM_022770.2    | GINS3        | -2.397 | Homo sapiens GINS complex subunit 3 (Psf3 homolog) (GINS3), mRNA.                                                                                                |
| NM_004973.2    | JARID2       | -2.383 | Homo sapiens jumonji, AT rich interactive domain 2 (JARID2), mRNA.                                                                                               |
| NM_014750.3    | DLGAP5       | -2.380 | Homo sapiens discs, large (Drosophila) homolog-associated protein 5 (DLGAP5), mRNA.                                                                              |
| NM_002116.5    | HLA-A        | -2.377 | Homo sapiens major histocompatibility complex, class I, A (HLA-A), mRNA.                                                                                         |
| NM_001124.1    | ADM          | -2.369 | Homo sapiens adrenomedullin (ADM), mRNA.                                                                                                                         |
| NM_006729.3    | DIAPH2       | -2.362 | Homo sapiens diaphanous homolog 2 (Drosophila) (DIAPH2), transcript variant 156, mRNA.                                                                           |
| NM_001168.2    | BIRC5        | -2.358 | Homo sapiens baculoviral IAP repeat-containing 5 (BIRC5), transcript variant 1, mRNA.                                                                            |
| XM_939056.2    | LOC649970    | -2.354 | PREDICTED: Homo sapiens similar to creatine kinase, mitochondrial 1B precursor (LOC649970), mRNA.                                                                |
| NM_005189.1    | CBX2         | -2.348 | Homo sapiens chromobox homolog 2 (Pc class homolog, Drosophila) (CBX2), transcript variant 1, mRNA.                                                              |
| NM_003916.3    | AP1S2        | -2.341 | Homo sapiens adaptor-related protein complex 1, sigma 2 subunit (AP1S2), mRNA.                                                                                   |
| NM_012238.3    | SIRT1        | -2.341 | Homo sapiens sirtuin (silent mating type information regulation 2 homolog) 1 ( <i>S. cerevisiae</i> ) (SIRT1), mRNA.                                             |
| NM_030919.2    | FAM83D       | -2.339 | Homo sapiens family with sequence similarity 83, member D (FAM83D), mRNA.                                                                                        |
| NM_003916.3    | AP1S2        | -2.334 | Homo sapiens adaptor-related protein complex 1, sigma 2 subunit (AP1S2), mRNA.                                                                                   |
| NM_001274.3    | CHEK1        | -2.326 | Homo sapiens CHK1 checkpoint homolog ( <i>S. pombe</i> ) (CHEK1), mRNA.                                                                                          |
| NM_030755.4    | TMX1         | -2.325 | Homo sapiens thioredoxin-related transmembrane protein 1 (TMX1), mRNA.                                                                                           |
| NM_000165.3    | GJA1         | -2.325 | Homo sapiens gap junction protein, alpha 1, 43kDa (GJA1), mRNA.                                                                                                  |
| NM_012485.1    | HMMR         | -2.322 | Homo sapiens hyaluronan-mediated motility receptor (RHAMM) (HMMR), transcript variant 2, mRNA.                                                                   |

|                |         |        |                                                                                                                                 |
|----------------|---------|--------|---------------------------------------------------------------------------------------------------------------------------------|
| NM_003318.3    | TTK     | -2.311 | Homo sapiens TTK protein kinase (TTK), mRNA.                                                                                    |
| NM_005915.4    | MCM6    | -2.311 | Homo sapiens minichromosome maintenance complex component 6 (MCM6), mRNA.                                                       |
| NM_005513.1    | GTF2E1  | -2.299 | Homo sapiens general transcription factor IIE, polypeptide 1 (alpha subunit, 56kD) (GTF2E1), mRNA.                              |
| NM_000859.1    | HMGCR   | -2.288 | Homo sapiens 3-hydroxy-3-methylglutaryl-Coenzyme A reductase (HMGCR), mRNA.                                                     |
| NM_174900.3    | ZFP42   | -2.269 | Homo sapiens zinc finger protein 42 homolog (mouse) (ZFP42), mRNA.                                                              |
| NM_005342.2    | HMGB3   | -2.261 | Homo sapiens high-mobility group box 3 (HMGB3), mRNA.                                                                           |
| NM_015570.1    | AUTS2   | -2.257 | Homo sapiens autism susceptibility candidate 2 (AUTS2), mRNA.                                                                   |
| NM_033625.2    | RPL34   | -2.251 | Homo sapiens ribosomal protein L34 (RPL34), transcript variant 2, mRNA.                                                         |
| NM_003032.2    | ST6GAL1 | -2.232 | Homo sapiens ST6 beta-galactosamide alpha-2,6-sialyltransferase 1 (ST6GAL1), transcript variant 2, mRNA.                        |
| NM_001033059.1 | AMD1    | -2.201 | Homo sapiens adenosylmethionine decarboxylase 1 (AMD1), transcript variant 2, mRNA.                                             |
| NM_003362.2    | UNG     | -2.177 | Homo sapiens uracil-DNA glycosylase (UNG), nuclear gene encoding mitochondrial protein, transcript variant 1, mRNA.             |
| NM_004321.4    | KIF1A   | -2.172 | Homo sapiens kinesin family member 1A (KIF1A), mRNA.                                                                            |
| NM_001212.3    | C1QBP   | -2.105 | Homo sapiens complement component 1, q subcomponent binding protein (C1QBP), nuclear gene encoding mitochondrial protein, mRNA. |
| NM_005896.2    | IDH1    | -2.062 | Homo sapiens isocitrate dehydrogenase 1 (NADP+), soluble (IDH1), mRNA.                                                          |
| NM_001448.2    | GPC4    | -2.047 | Homo sapiens glypican 4 (GPC4), mRNA.                                                                                           |



**Supplementary table 3: Genes up regulated in Day 12 as compared to Day 0**

| Refseq_NM      | Gene symbol | D12/D0.fc | DEFINITION                                                                                                                       |
|----------------|-------------|-----------|----------------------------------------------------------------------------------------------------------------------------------|
| NM_014211.1    | GABRP       | 115.164   | Homo sapiens gamma-aminobutyric acid (GABA) A receptor, pi (GABRP), mRNA.                                                        |
| NM_024626.2    | VTCN1       | 110.833   | Homo sapiens V-set domain containing T cell activation inhibitor 1 (VTCN1), mRNA.                                                |
| NM_004821.1    | HAND1       | 109.556   | Homo sapiens heart and neural crest derivatives expressed 1 (HAND1), mRNA.                                                       |
| NM_001430.3    | EPAS1       | 92.690    | Homo sapiens endothelial PAS domain protein 1 (EPAS1), mRNA.                                                                     |
| NM_001042425.1 | TFAP2A      | 80.495    | Homo sapiens transcription factor AP-2 alpha (activating enhancer binding protein 2 alpha) (TFAP2A), transcript variant 3, mRNA. |
| NM_004613.2    | TGM2        | 49.095    | Homo sapiens transglutaminase 2 (C polypeptide, protein-glutamine-gamma-glutamyltransferase) (TGM2), transcript variant 1, mRNA. |
| NM_000358.1    | TGFB1       | 48.979    | Homo sapiens transforming growth factor, beta-induced, 68kDa (TGFB1), mRNA.                                                      |
| NR_002196.1    | H19         | 48.264    | Homo sapiens H19, imprinted maternally expressed transcript (non-protein coding) (H19), non-coding RNA.                          |
| NM_133505.2    | DCN         | 47.699    | Homo sapiens decorin (DCN), transcript variant C, mRNA.                                                                          |
| NM_020130.3    | C8orf4      | 42.822    | Homo sapiens chromosome 8 open reading frame 4 (C8orf4), mRNA.                                                                   |
| NM_000090.3    | COL3A1      | 41.723    | Homo sapiens collagen, type III, alpha 1 (COL3A1), mRNA.                                                                         |
| NM_152321.1    | ERP27       | 41.607    | Homo sapiens endoplasmic reticulum protein 27 kDa (ERP27), mRNA.                                                                 |
| NM_002345.3    | LUM         | 41.260    | Homo sapiens lumican (LUM), mRNA.                                                                                                |
| NM_004994.2    | MMP9        | 40.432    | Homo sapiens matrix metalloproteinase 9 (gelatinase B, 92kDa gelatinase, 92kDa type IV collagenase) (MMP9), mRNA.                |
| NM_021005.2    | NR2F2       | 36.073    | Homo sapiens nuclear receptor subfamily 2, group F, member 2 (NR2F2), mRNA.                                                      |
| NM_184085.1    | TRIM55      | 36.011    | Homo sapiens tripartite motif-containing 55 (TRIM55), transcript variant 1, mRNA.                                                |
| NM_181712.4    | KANK4       | 35.816    | Homo sapiens KN motif and ankyrin repeat domains 4 (KANK4), mRNA.                                                                |
| NM_181712.3    | ANKRD38     | 34.705    | Homo sapiens ankyrin repeat domain 38 (ANKRD38), mRNA.                                                                           |
| NM_000598.4    | IGFBP3      | 34.232    | Homo sapiens insulin-like growth factor binding protein 3 (IGFBP3), transcript variant 2, mRNA.                                  |
| NM_184086.1    | TRIM55      | 34.125    | Homo sapiens tripartite motif-containing 55 (TRIM55), transcript variant 3, mRNA.                                                |
| NM_001013398.1 | IGFBP3      | 33.884    | Homo sapiens insulin-like growth factor binding protein 3 (IGFBP3), transcript variant 1, mRNA.                                  |
| NM_182920.1    | ADAMTS9     | 30.342    | Homo sapiens ADAM metalloproteinase with thrombospondin type 1 motif, 9 (ADAMTS9), mRNA.                                         |
| NM_052947.3    | ALPK2       | 28.891    | Homo sapiens alpha-kinase 2 (ALPK2), mRNA.                                                                                       |
| NM_002160.2    | TNC         | 28.417    | Homo sapiens tenascin C (TNC), mRNA.                                                                                             |
| NM_172315.1    | MEIS2       | 28.177    | Homo sapiens Meis homeobox 2 (MEIS2), transcript variant g, mRNA.                                                                |
| NM_000599.2    | IGFBP5      | 26.499    | Homo sapiens insulin-like growth factor binding protein 5 (IGFBP5), mRNA.                                                        |
| NM_032413.2    | C15orf48    | 25.052    | Homo sapiens chromosome 15 open reading frame 48 (C15orf48), transcript variant 2, mRNA.                                         |
| NM_003068.3    | SNAI2       | 24.724    | Homo sapiens snail homolog 2 (Drosophila) (SNAI2), mRNA.                                                                         |
| NM_001613.1    | ACTA2       | 24.673    | Homo sapiens actin, alpha 2, smooth muscle, aorta (ACTA2), mRNA.                                                                 |
| NM_173054.1    | RELN        | 24.614    | Homo sapiens reelin (RELN), transcript variant 2, mRNA.                                                                          |
| NM_000093.3    | COL5A1      | 24.434    | Homo sapiens collagen, type V, alpha 1 (COL5A1), mRNA.                                                                           |

|                |         |        |                                                                                                                                  |
|----------------|---------|--------|----------------------------------------------------------------------------------------------------------------------------------|
| NM_000599.2    | IGFBP5  | 23.569 | Homo sapiens insulin-like growth factor binding protein 5 (IGFBP5), mRNA.                                                        |
| NM_005630.1    | SLCO2A1 | 23.482 | Homo sapiens solute carrier organic anion transporter family, member 2A1 (SLCO2A1), mRNA.                                        |
| NM_002145.3    | HOXB2   | 23.281 | Homo sapiens homeobox B2 (HOXB2), mRNA.                                                                                          |
| NM_057165.2    | COL6A3  | 22.949 | Homo sapiens collagen, type VI, alpha 3 (COL6A3), transcript variant 3, mRNA.                                                    |
| NM_001032280.2 | TFAP2A  | 22.840 | Homo sapiens transcription factor AP-2 alpha (activating enhancer binding protein 2 alpha) (TFAP2A), transcript variant 2, mRNA. |
| NM_001175.4    | ARHGDI3 | 21.512 | Homo sapiens Rho GDP dissociation inhibitor (GDI) beta (ARHGDI3), mRNA.                                                          |
| NM_001553.1    | IGFBP7  | 20.972 | Homo sapiens insulin-like growth factor binding protein 7 (IGFBP7), mRNA.                                                        |
| NM_133265.2    | AMOT    | 19.936 | Homo sapiens angiomin (AMOT), transcript variant 2, mRNA.                                                                        |
| NM_002653.3    | PITX1   | 19.816 | Homo sapiens paired-like homeodomain transcription factor 1 (PITX1), mRNA.                                                       |
| NM_002353.1    | TACSTD2 | 19.585 | Homo sapiens tumor-associated calcium signal transducer 2 (TACSTD2), mRNA.                                                       |
| NM_133337.1    | FER1L3  | 19.558 | Homo sapiens fer-1-like 3, myoferlin (C. elegans) (FER1L3), transcript variant 2, mRNA.                                          |
| NM_013451.3    | MYOF    | 18.731 | Homo sapiens myoferlin (MYOF), transcript variant 1, mRNA.                                                                       |
| NM_002202.1    | ISL1    | 18.701 | Homo sapiens ISL1 transcription factor, LIM/homeodomain, (islet-1) (ISL1), mRNA.                                                 |
| NM_001884.2    | HAPLN1  | 18.646 | Homo sapiens hyaluronan and proteoglycan link protein 1 (HAPLN1), mRNA.                                                          |
| NM_004369.2    | COL6A3  | 18.540 | Homo sapiens collagen, type VI, alpha 3 (COL6A3), transcript variant 1, mRNA.                                                    |
| NM_033255.2    | EPST11  | 17.474 | Homo sapiens epithelial stromal interaction 1 (breast) (EPST11), transcript variant 2, mRNA.                                     |
| NM_024911.4    | GPR177  | 17.212 | Homo sapiens G protein-coupled receptor 177 (GPR177), transcript variant 1, mRNA.                                                |
| NM_003063.2    | SLN     | 16.983 | Homo sapiens sarcolipin (SLN), mRNA.                                                                                             |
| NM_198552.1    | FAM89A  | 16.478 | Homo sapiens family with sequence similarity 89, member A (FAM89A), mRNA.                                                        |
| NM_014899.3    | RHOBTB3 | 16.443 | Homo sapiens Rho-related BTB domain containing 3 (RHOBTB3), mRNA.                                                                |
| NM_005613.3    | RGS4    | 15.940 | Homo sapiens regulator of G-protein signalling 4 (RGS4), mRNA.                                                                   |
| NM_005161.3    | APLNR   | 15.307 | Homo sapiens apelin receptor (APLNR), mRNA.                                                                                      |
| NM_025140.1    | CCDC92  | 15.136 | Homo sapiens coiled-coil domain containing 92 (CCDC92), mRNA.                                                                    |
| NM_000963.1    | PTGS2   | 14.812 | Homo sapiens prostaglandin-endoperoxide synthase 2 (prostaglandin G/H synthase and cyclooxygenase) (PTGS2), mRNA.                |
| NM_001001936.1 | AFAP1L2 | 14.713 | Homo sapiens actin filament associated protein 1-like 2 (AFAP1L2), transcript variant 1, mRNA.                                   |
| NM_016267.2    | VGLL1   | 14.674 | Homo sapiens vestigial like 1 (Drosophila) (VGLL1), mRNA.                                                                        |
| NM_006727.2    | CDH10   | 14.299 | Homo sapiens cadherin 10, type 2 (T2-cadherin) (CDH10), mRNA.                                                                    |
| NM_002521.2    | NPPB    | 13.860 | Homo sapiens natriuretic peptide precursor B (NPPB), mRNA.                                                                       |
| NM_000862.2    | HSD3B1  | 13.575 | Homo sapiens hydroxy-delta-5-steroid dehydrogenase, 3 beta- and steroid delta-isomerase 1 (HSD3B1), mRNA.                        |
| NM_006472.2    | TXNIP   | 13.544 | Homo sapiens thioredoxin interacting protein (TXNIP), mRNA.                                                                      |
| NM_003062.1    | SLIT3   | 13.255 | Homo sapiens slit homolog 3 (Drosophila) (SLIT3), mRNA.                                                                          |
| NM_153321.1    | PMP22   | 13.191 | Homo sapiens peripheral myelin protein 22 (PMP22), transcript variant 2, mRNA.                                                   |

|                |          |        |                                                                                                                            |
|----------------|----------|--------|----------------------------------------------------------------------------------------------------------------------------|
| NM_007173.4    | PRSS23   | 13.124 | Homo sapiens protease, serine, 23 (PRSS23), mRNA.                                                                          |
| NM_014585.3    | SLC40A1  | 12.967 | Homo sapiens solute carrier family 40 (iron-regulated transporter), member 1 (SLC40A1), mRNA.                              |
| NM_024430.2    | PSTPIP2  | 12.782 | Homo sapiens proline-serine-threonine phosphatase interacting protein 2 (PSTPIP2), mRNA.                                   |
| NM_002448.3    | MSX1     | 12.692 | Homo sapiens msh homeobox 1 (MSX1), mRNA.                                                                                  |
| NM_001002292.1 | GPR177   | 12.622 | Homo sapiens G protein-coupled receptor 177 (GPR177), transcript variant 2, mRNA.                                          |
| NM_002341.1    | LTB      | 12.520 | Homo sapiens lymphotoxin beta (TNF superfamily, member 3) (LTB), transcript variant 1, mRNA.                               |
| NM_004207.2    | SLC16A3  | 12.485 | Homo sapiens solute carrier family 16, member 3 (monocarboxylic acid transporter 4) (SLC16A3), transcript variant 2, mRNA. |
| NM_016613.4    | C4orf18  | 12.481 | Homo sapiens chromosome 4 open reading frame 18 (C4orf18), transcript variant 2, mRNA.                                     |
| NM_016613.5    | C4orf18  | 12.266 | Homo sapiens chromosome 4 open reading frame 18 (C4orf18), transcript variant 2, mRNA.                                     |
| NM_201525.1    | GPR56    | 12.184 | Homo sapiens G protein-coupled receptor 56 (GPR56), transcript variant 3, mRNA.                                            |
| NM_001124758.1 | SPNS2    | 12.150 | Homo sapiens spinster homolog 2 (Drosophila) (SPNS2), mRNA.                                                                |
| NM_001002292.1 | GPR177   | 12.060 | Homo sapiens G protein-coupled receptor 177 (GPR177), transcript variant 2, mRNA.                                          |
| NM_000856.3    | GUCY1A3  | 12.022 | Homo sapiens guanylate cyclase 1, soluble, alpha 3 (GUCY1A3), mRNA.                                                        |
| NM_198552.1    | FAM89A   | 12.002 | Homo sapiens family with sequence similarity 89, member A (FAM89A), mRNA.                                                  |
| NM_206966.2    | C5orf46  | 11.944 | Homo sapiens chromosome 5 open reading frame 46 (C5orf46), mRNA.                                                           |
| NM_013451.2    | FER1L3   | 11.817 | Homo sapiens fer-1-like 3, myoferlin (C. elegans) (FER1L3), transcript variant 1, mRNA.                                    |
| NM_003873.4    | NRP1     | 11.583 | Homo sapiens neuropilin 1 (NRP1), transcript variant 1, mRNA.                                                              |
| NM_000089.3    | COL1A2   | 11.566 | Homo sapiens collagen, type I, alpha 2 (COL1A2), mRNA.                                                                     |
| NM_004428.2    | EFNA1    | 11.539 | Homo sapiens ephrin-A1 (EFNA1), transcript variant 1, mRNA.                                                                |
| NM_000389.2    | CDKN1A   | 11.406 | Homo sapiens cyclin-dependent kinase inhibitor 1A (p21, Cip1) (CDKN1A), transcript variant 1, mRNA.                        |
| NM_000089.3    | COL1A2   | 11.346 | Homo sapiens collagen, type I, alpha 2 (COL1A2), mRNA.                                                                     |
| NM_001323.2    | CST6     | 11.246 | Homo sapiens cystatin E/M (CST6), mRNA.                                                                                    |
| NM_001620.1    | AHNAK    | 11.245 | Homo sapiens AHNAK nucleoprotein (AHNAK), transcript variant 1, mRNA.                                                      |
| NM_001037582.1 | SCD5     | 11.134 | Homo sapiens stearoyl-CoA desaturase 5 (SCD5), transcript variant 1, mRNA.                                                 |
| NM_015419.2    | MXRA5    | 11.052 | Homo sapiens matrix-remodelling associated 5 (MXRA5), mRNA.                                                                |
| NM_153366.2    | SVEP1    | 11.012 | Homo sapiens sushi, von Willebrand factor type A, EGF and pentraxin domain containing 1 (SVEP1), mRNA.                     |
| NM_152611.2    | C20orf75 | 11.004 | Homo sapiens chromosome 20 open reading frame 75 (C20orf75), mRNA.                                                         |
| NM_203411.1    | TMEM88   | 10.850 | Homo sapiens transmembrane protein 88 (TMEM88), mRNA.                                                                      |
| NM_000362.4    | TIMP3    | 10.718 | Homo sapiens TIMP metalloproteinase inhibitor 3 (TIMP3), mRNA.                                                             |
| NM_032550.2    | AFAP1L2  | 10.699 | Homo sapiens actin filament associated protein 1-like 2 (AFAP1L2), transcript variant 2, mRNA.                             |
| NM_002543.3    | OLR1     | 10.599 | Homo sapiens oxidized low density lipoprotein (lectin-like) receptor 1 (OLR1), mRNA.                                       |
| NM_003068.3    | SNAI2    | 10.534 | Homo sapiens snail homolog 2 (Drosophila) (SNAI2), mRNA.                                                                   |

|                |              |        |                                                                                                                                  |
|----------------|--------------|--------|----------------------------------------------------------------------------------------------------------------------------------|
| NM_001453.1    | FOXC1        | 10.430 | Homo sapiens forkhead box C1 (FOXC1), mRNA.                                                                                      |
| NM_198951.1    | TGM2         | 10.110 | Homo sapiens transglutaminase 2 (C polypeptide, protein-glutamine-gamma-glutamyltransferase) (TGM2), transcript variant 2, mRNA. |
| NM_001040708.1 | HEY1         | 10.051 | Homo sapiens hairy/enhancer-of-split related with YRPW motif 1 (HEY1), transcript variant 2, mRNA.                               |
| XM_939093.1    | FAM89A       | 10.020 | PREDICTED: Homo sapiens family with sequence similarity 89, member A (FAM89A), mRNA.                                             |
| AK025332       |              | 9.802  | Homo sapiens cDNA: FLJ21679 fis, clone COL09221                                                                                  |
| NM_000316.2    | PTH1R        | 9.741  | Homo sapiens parathyroid hormone 1 receptor (PTH1R), mRNA.                                                                       |
| NM_001002292.1 | GPR177       | 9.718  | Homo sapiens G protein-coupled receptor 177 (GPR177), transcript variant 2, mRNA.                                                |
| NM_031910.3    | C1QTNF6      | 9.698  | Homo sapiens C1q and tumor necrosis factor related protein 6 (C1QTNF6), transcript variant 1, mRNA.                              |
| NM_201524.1    | GPR56        | 9.697  | Homo sapiens G protein-coupled receptor 56 (GPR56), transcript variant 2, mRNA.                                                  |
| NM_021205.4    | RHOU         | 9.667  | Homo sapiens ras homolog gene family, member U (RHOU), mRNA.                                                                     |
| NM_000700.1    | ANXA1        | 9.633  | Homo sapiens annexin A1 (ANXA1), mRNA.                                                                                           |
| NM_003979.3    | GPRC5A       | 9.539  | Homo sapiens G protein-coupled receptor, family C, group 5, member A (GPRC5A), mRNA.                                             |
| NM_003670.1    | BHLHB2       | 9.463  | Homo sapiens basic helix-loop-helix domain containing, class B, 2 (BHLHB2), mRNA.                                                |
| NM_025202.2    | EFHD1        | 9.442  | Homo sapiens EF-hand domain family, member D1 (EFHD1), mRNA.                                                                     |
| NM_019058.2    | DDIT4        | 9.425  | Homo sapiens DNA-damage-inducible transcript 4 (DDIT4), mRNA.                                                                    |
| NM_001977.3    | ENPEP        | 9.397  | Homo sapiens glutamyl aminopeptidase (aminopeptidase A) (ENPEP), mRNA.                                                           |
| NM_002476.2    | MYL4         | 9.308  | Homo sapiens myosin, light chain 4, alkali; atrial, embryonic (MYL4), transcript variant 2, mRNA.                                |
| NM_133468.3    | BMPER        | 9.227  | Homo sapiens BMP binding endothelial regulator (BMPER), mRNA.                                                                    |
| NM_001421.2    | ELF4         | 9.200  | Homo sapiens E74-like factor 4 (ets domain transcription factor) (ELF4), mRNA.                                                   |
| NM_032873.3    | STS-1        | 9.129  | Homo sapiens Cbl-interacting protein Sts-1 (STS-1), mRNA.                                                                        |
| NM_004120.3    | GBP2         | 9.106  | Homo sapiens guanylate binding protein 2, interferon-inducible (GBP2), mRNA.                                                     |
| NM_001630.1    | ANXA8        | 9.109  | Homo sapiens annexin A8 (ANXA8), mRNA.                                                                                           |
| NM_006751.4    | SSFA2        | 9.062  | Homo sapiens sperm specific antigen 2 (SSFA2), mRNA.                                                                             |
| NM_024519.2    | FAM65A       | 9.026  | Homo sapiens family with sequence similarity 65, member A (FAM65A), mRNA.                                                        |
| XM_926584.1    | LOC653110    | 8.534  | PREDICTED: Homo sapiens similar to annexin A8, transcript variant 1 (LOC653110), mRNA.                                           |
| NM_001884.2    | HAPLN1       | 8.513  | Homo sapiens hyaluronan and proteoglycan link protein 1 (HAPLN1), mRNA.                                                          |
| NM_006255.3    | PRKCH        | 8.506  | Homo sapiens protein kinase C, eta (PRKCH), mRNA.                                                                                |
| NM_005045.2    | RELN         | 8.430  | Homo sapiens reelin (RELN), transcript variant 1, mRNA.                                                                          |
| NM_000905.2    | NPY          | 8.428  | Homo sapiens neuropeptide Y (NPY), mRNA.                                                                                         |
| NM_007088.2    | CALB2        | 8.413  | Homo sapiens calbindin 2 (CALB2), transcript variant CALB2c, mRNA.                                                               |
| NM_001114981.1 | TP63         | 8.407  | Homo sapiens tumor protein p63 (TP63), transcript variant 5, mRNA.                                                               |
| XR_038625.1    | LOC100132535 | 8.402  | PREDICTED: Homo sapiens misc_RNA (LOC100132535), miscRNA.                                                                        |
| NM_001797.2    | CDH11        | 8.369  | Homo sapiens cadherin 11, type 2, OB-cadherin (osteoblast) (CDH11), mRNA.                                                        |
| XM_001126087.1 | LOC728473    | 8.281  | PREDICTED: Homo sapiens hypothetical LOC728473 (LOC728473), mRNA.                                                                |

|                |           |       |                                                                                                                                                                          |
|----------------|-----------|-------|--------------------------------------------------------------------------------------------------------------------------------------------------------------------------|
| NM_001007023.2 | DIO2      | 7.822 | Homo sapiens deiodinase, iodothyronine, type II (DIO2), transcript variant 3, mRNA.                                                                                      |
| XM_001126471.1 | LOC730278 | 7.793 | PREDICTED: Homo sapiens hypothetical LOC730278 (LOC730278), mRNA.                                                                                                        |
| NM_001007097.1 | NTRK2     | 7.692 | Homo sapiens neurotrophic tyrosine kinase, receptor, type 2 (NTRK2), transcript variant b, mRNA.                                                                         |
| NM_001007139.3 | IGF2      | 7.668 | Homo sapiens insulin-like growth factor 2 (somatomedin A) (IGF2), transcript variant 2, mRNA.                                                                            |
| NM_172112.1    | EYA2      | 7.621 | Homo sapiens eyes absent homolog 2 (Drosophila) (EYA2), transcript variant 4, mRNA.                                                                                      |
| NM_013231.4    | FLRT2     | 7.579 | Homo sapiens fibronectin leucine rich transmembrane protein 2 (FLRT2), mRNA.                                                                                             |
| NM_014890.2    | FILIP1L   | 7.575 | Homo sapiens filamin A interacting protein 1-like (FILIP1L), transcript variant 2, mRNA.                                                                                 |
| NM_198391.1    | FLRT3     | 7.526 | Homo sapiens fibronectin leucine rich transmembrane protein 3 (FLRT3), transcript variant 2, mRNA.                                                                       |
| NM_014624.3    | S100A6    | 7.484 | Homo sapiens S100 calcium binding protein A6 (S100A6), mRNA.                                                                                                             |
| NM_002982.3    | CCL2      | 7.412 | Homo sapiens chemokine (C-C motif) ligand 2 (CCL2), mRNA.                                                                                                                |
| NM_002345.3    | LUM       | 7.399 | Homo sapiens lumican (LUM), mRNA.                                                                                                                                        |
| NM_002449.4    | MSX2      | 7.356 | Homo sapiens msh homeobox 2 (MSX2), mRNA.                                                                                                                                |
| NM_002247.2    | KCNMA1    | 7.329 | Homo sapiens potassium large conductance calcium-activated channel, subfamily M, alpha member 1 (KCNMA1), transcript variant 2, mRNA.                                    |
| NM_002160.1    | TNC       | 7.322 | Homo sapiens tenascin C (hexabrachion) (TNC), mRNA.                                                                                                                      |
| NM_199355.2    | ADAMTS18  | 7.315 | Homo sapiens ADAM metalloproteinase with thrombospondin type 1 motif, 18 (ADAMTS18), mRNA.                                                                               |
| NM_018993.2    | RIN2      | 7.298 | Homo sapiens Ras and Rab interactor 2 (RIN2), mRNA.                                                                                                                      |
| NM_003966.2    | SEMA5A    | 7.298 | Homo sapiens sema domain, seven thrombospondin repeats (type 1 and type 1-like), transmembrane domain (TM) and short cytoplasmic domain, (semaphorin) 5A (SEMA5A), mRNA. |
| NM_005620.1    | S100A11   | 7.275 | Homo sapiens S100 calcium binding protein A11 (S100A11), mRNA.                                                                                                           |
| NM_002404.1    | MFAP4     | 7.268 | Homo sapiens microfibrillar-associated protein 4 (MFAP4), mRNA.                                                                                                          |
| NM_006283.1    | TACC1     | 7.247 | Homo sapiens transforming, acidic coiled-coil containing protein 1 (TACC1), mRNA.                                                                                        |
| NM_024911.4    | GPR177    | 7.197 | Homo sapiens G protein-coupled receptor 177 (GPR177), transcript variant 1, mRNA.                                                                                        |
| NM_024574.3    | C4orf31   | 7.172 | Homo sapiens chromosome 4 open reading frame 31 (C4orf31), mRNA.                                                                                                         |
| NM_002203.3    | ITGA2     | 7.176 | Homo sapiens integrin, alpha 2 (CD49B, alpha 2 subunit of VLA-2 receptor) (ITGA2), mRNA.                                                                                 |
| NM_001955.2    | EDN1      | 7.147 | Homo sapiens endothelin 1 (EDN1), mRNA.                                                                                                                                  |
| NM_002658.2    | PLAU      | 7.076 | Homo sapiens plasminogen activator, urokinase (PLAU), mRNA.                                                                                                              |
| NM_006885.3    | ZFH3      | 7.041 | Homo sapiens zinc finger homeobox 3 (ZFH3), transcript variant A, mRNA.                                                                                                  |
| NM_003392.3    | WNT5A     | 6.981 | Homo sapiens wingless-type MMTV integration site family, member 5A (WNT5A), mRNA.                                                                                        |
| NM_018670.2    | MESP1     | 6.962 | Homo sapiens mesoderm posterior 1 homolog (mouse) (MESP1), mRNA.                                                                                                         |
| NM_005195.3    | CEBPD     | 6.945 | Homo sapiens CCAAT/enhancer binding protein (C/EBP), delta (CEBPD), mRNA.                                                                                                |
| NM_002026.2    | FN1       | 6.883 | Homo sapiens fibronectin 1 (FN1), transcript variant 3, mRNA.                                                                                                            |
| NM_003619.2    | PRSS12    | 6.829 | Homo sapiens protease, serine, 12 (neurotrypsin, motopsin) (PRSS12), mRNA.                                                                                               |

|                |           |       |                                                                                                                                      |
|----------------|-----------|-------|--------------------------------------------------------------------------------------------------------------------------------------|
| NM_176796.1    | P2RY6     | 6.777 | Homo sapiens pyrimidinergetic receptor P2Y, G-protein coupled, 6 (P2RY6), transcript variant 3, mRNA.                                |
| NM_152753.2    | SCUBE3    | 6.774 | Homo sapiens signal peptide, CUB domain, EGF-like 3 (SCUBE3), mRNA.                                                                  |
| NM_001017973.1 | P4HA2     | 6.745 | Homo sapiens prolyl 4-hydroxylase, alpha polypeptide II (P4HA2), transcript variant 2, mRNA.                                         |
| NM_001717.2    | BNC1      | 6.741 | Homo sapiens basonuclein 1 (BNC1), mRNA.                                                                                             |
| NM_182801.1    | EGFLAM    | 6.740 | Homo sapiens EGF-like, fibronectin type III and laminin G domains (EGFLAM), transcript variant 4, mRNA.                              |
| NM_139212.2    | HOPX      | 6.730 | Homo sapiens HOP homeobox (HOPX), transcript variant 3, mRNA.                                                                        |
| NM_032772.3    | ZNF503    | 6.718 | Homo sapiens zinc finger protein 503 (ZNF503), mRNA.                                                                                 |
| NM_078487.2    | CDKN2B    | 6.706 | Homo sapiens cyclin-dependent kinase inhibitor 2B (p15, inhibits CDK4) (CDKN2B), transcript variant 2, mRNA.                         |
| NM_021965.3    | PGM5      | 6.651 | Homo sapiens phosphoglucomutase 5 (PGM5), mRNA.                                                                                      |
| NM_000612.2    | IGF2      | 6.641 | Homo sapiens insulin-like growth factor 2 (somatomedin A) (IGF2), mRNA.                                                              |
| NM_022873.2    | IFI6      | 6.635 | Homo sapiens interferon, alpha-inducible protein 6 (IFI6), transcript variant 3, mRNA.                                               |
| NM_020311.2    | CXCR7     | 6.632 | Homo sapiens chemokine (C-X-C motif) receptor 7 (CXCR7), mRNA.                                                                       |
| NM_002960.1    | S100A3    | 6.609 | Homo sapiens S100 calcium binding protein A3 (S100A3), mRNA.                                                                         |
| NM_018584.5    | CAMK2N1   | 6.598 | Homo sapiens calcium/calmodulin-dependent protein kinase II inhibitor 1 (CAMK2N1), mRNA.                                             |
| NM_080645.2    | COL12A1   | 6.585 | Homo sapiens collagen, type XII, alpha 1 (COL12A1), transcript variant short, mRNA.                                                  |
| NM_012342.2    | BAMBI     | 6.437 | Homo sapiens BMP and activin membrane-bound inhibitor homolog ( <i>Xenopus laevis</i> ) (BAMBI), mRNA.                               |
| NM_001257.3    | CDH13     | 6.423 | Homo sapiens cadherin 13, H-cadherin (heart) (CDH13), mRNA.                                                                          |
| NM_004878.3    | PTGES     | 6.375 | Homo sapiens prostaglandin E synthase (PTGES), mRNA.                                                                                 |
| NM_002398.2    | MEIS1     | 6.309 | Homo sapiens Meis homeobox 1 (MEIS1), mRNA.                                                                                          |
| NM_021965.3    | PGM5      | 6.286 | Homo sapiens phosphoglucomutase 5 (PGM5), mRNA.                                                                                      |
| NM_004428.2    | EFNA1     | 6.277 | Homo sapiens ephrin-A1 (EFNA1), transcript variant 1, mRNA.                                                                          |
| NM_000088.3    | COL1A1    | 6.272 | Homo sapiens collagen, type I, alpha 1 (COL1A1), mRNA.                                                                               |
| XR_016703.1    | LOC644743 | 6.269 | PREDICTED: Homo sapiens hypothetical LOC644743 (LOC644743), mRNA.                                                                    |
| NM_001717.2    | BNC1      | 6.268 | Homo sapiens basonuclein 1 (BNC1), mRNA.                                                                                             |
| NM_000735.2    | CGA       | 6.263 | Homo sapiens glycoprotein hormones, alpha polypeptide (CGA), mRNA.                                                                   |
| NM_000735.2    | CGA       | 6.263 | Homo sapiens glycoprotein hormones, alpha polypeptide (CGA), mRNA.                                                                   |
| NM_001024912.1 | CEACAM1   | 6.237 | Homo sapiens carcinoembryonic antigen-related cell adhesion molecule 1 (biliary glycoprotein) (CEACAM1), transcript variant 2, mRNA. |
| NM_031476.2    | CRISPLD2  | 6.232 | Homo sapiens cysteine-rich secretory protein LCCL domain containing 2 (CRISPLD2), mRNA.                                              |
| NM_002317.3    | LOX       | 6.193 | Homo sapiens lysyl oxidase (LOX), mRNA.                                                                                              |
| NM_001012964.1 | KLK6      | 6.191 | Homo sapiens kallikrein-related peptidase 6 (KLK6), transcript variant B, mRNA.                                                      |
| NM_001036.2    | RYR3      | 6.169 | Homo sapiens ryanodine receptor 3 (RYR3), mRNA.                                                                                      |
| NM_015691.2    | WWC3      | 6.162 | Homo sapiens WWC family member 3 (WWC3), mRNA.                                                                                       |
| NM_001423.1    | EMP1      | 6.118 | Homo sapiens epithelial membrane protein 1 (EMP1), mRNA.                                                                             |

|                |           |       |                                                                                                                                 |
|----------------|-----------|-------|---------------------------------------------------------------------------------------------------------------------------------|
| NM_002609.3    | PDGFRB    | 6.116 | Homo sapiens platelet-derived growth factor receptor, beta polypeptide (PDGFRB), mRNA.                                          |
| NM_178565.3    | RSPO2     | 6.015 | Homo sapiens R-spondin 2 homolog (Xenopus laevis) (RSPO2), mRNA.                                                                |
| NM_004093.2    | EFNB2     | 6.013 | Homo sapiens ephrin-B2 (EFNB2), mRNA.                                                                                           |
| NM_005562.1    | LAMC2     | 5.976 | Homo sapiens laminin, gamma 2 (LAMC2), transcript variant 1, mRNA.                                                              |
| XR_018676.1    | LOC647954 | 5.972 | PREDICTED: Homo sapiens misc_RNA (LOC647954), miscRNA.                                                                          |
| NM_000393.3    | COL5A2    | 5.955 | Homo sapiens collagen, type V, alpha 2 (COL5A2), mRNA.                                                                          |
| NM_015036.1    | ENDOD1    | 5.933 | Homo sapiens endonuclease domain containing 1 (ENDOD1), mRNA.                                                                   |
| NM_000494.3    | COL17A1   | 5.916 | Homo sapiens collagen, type XVII, alpha 1 (COL17A1), mRNA.                                                                      |
| NM_022131.1    | CLSTN2    | 5.882 | Homo sapiens calstentenin 2 (CLSTN2), mRNA.                                                                                     |
| NM_000888.3    | ITGB6     | 5.855 | Homo sapiens integrin, beta 6 (ITGB6), mRNA.                                                                                    |
| NM_182487.2    | OLFML2A   | 5.874 | Homo sapiens olfactomedin-like 2A (OLFML2A), mRNA.                                                                              |
| NM_145057.2    | CDC42EP5  | 5.839 | Homo sapiens CDC42 effector protein (Rho GTPase binding) 5 (CDC42EP5), mRNA.                                                    |
| NM_014333.3    | CADM1     | 5.788 | Homo sapiens cell adhesion molecule 1 (CADM1), transcript variant 1, mRNA.                                                      |
| NM_006287.4    | TFPI      | 5.771 | Homo sapiens tissue factor pathway inhibitor (lipoprotein-associated coagulation inhibitor) (TFPI), transcript variant 1, mRNA. |
| NM_005512.1    | LRR32     | 5.746 | Homo sapiens leucine rich repeat containing 32 (LRR32), mRNA.                                                                   |
| NM_016205.1    | PDGFC     | 5.718 | Homo sapiens platelet derived growth factor C (PDGFC), mRNA.                                                                    |
| NM_005996.3    | TBX3      | 5.693 | Homo sapiens T-box 3 (TBX3), transcript variant 1, mRNA.                                                                        |
| NM_002147.3    | HOXB5     | 5.686 | Homo sapiens homeobox B5 (HOXB5), mRNA.                                                                                         |
| NM_207304.1    | MBNL2     | 5.680 | Homo sapiens muscleblind-like 2 (Drosophila) (MBNL2), transcript variant 3, mRNA.                                               |
| NM_003238.1    | TGFB2     | 5.668 | Homo sapiens transforming growth factor, beta 2 (TGFB2), mRNA.                                                                  |
| NM_002048.1    | GAS1      | 5.614 | Homo sapiens growth arrest-specific 1 (GAS1), mRNA.                                                                             |
| NM_006851.2    | GLIPR1    | 5.597 | Homo sapiens GLI pathogenesis-related 1 (GLIPR1), mRNA.                                                                         |
| NM_006142.3    | SFN       | 5.592 | Homo sapiens stratifin (SFN), mRNA.                                                                                             |
| NM_006287.4    | TFPI      | 5.578 | Homo sapiens tissue factor pathway inhibitor (lipoprotein-associated coagulation inhibitor) (TFPI), transcript variant 1, mRNA. |
| NM_001047841.1 | CXCR7     | 5.568 | Homo sapiens chemokine (C-X-C motif) receptor 7 (CXCR7), transcript variant 1, mRNA.                                            |
| NM_000756.1    | CRH       | 5.556 | Homo sapiens corticotropin releasing hormone (CRH), mRNA.                                                                       |
| NM_001630.2    | ANXA8L2   | 5.551 | Homo sapiens annexin A8-like 2 (ANXA8L2), mRNA.                                                                                 |
| NM_001001391.1 | CD44      | 5.528 | Homo sapiens CD44 molecule (Indian blood group) (CD44), transcript variant 4, mRNA.                                             |
| NM_181873.2    | MTMR11    | 5.498 | Homo sapiens myotubularin related protein 11 (MTMR11), mRNA.                                                                    |
| NM_001458.3    | FLNC      | 5.488 | Homo sapiens filamin C, gamma (actin binding protein 280) (FLNC), mRNA.                                                         |
| NM_022164.1    | TINAGL1   | 5.479 | Homo sapiens tubulointerstitial nephritis antigen-like 1 (TINAGL1), mRNA.                                                       |
| NM_006487.2    | FBLN1     | 5.455 | Homo sapiens fibulin 1 (FBLN1), transcript variant A, mRNA.                                                                     |
| NM_002205.2    | ITGA5     | 5.435 | Homo sapiens integrin, alpha 5 (fibronectin receptor, alpha polypeptide) (ITGA5), mRNA.                                         |
| NM_024913.3    | FLJ21986  | 5.432 | Homo sapiens hypothetical protein FLJ21986 (FLJ21986), mRNA.                                                                    |
| NM_031439.2    | SOX7      | 5.426 | Homo sapiens SRY (sex determining region Y)-box 7 (SOX7), mRNA.                                                                 |
| NM_000039.1    | APOA1     | 5.425 | Homo sapiens apolipoprotein A-I (APOA1), mRNA.                                                                                  |

|                |           |       |                                                                                                                                                     |
|----------------|-----------|-------|-----------------------------------------------------------------------------------------------------------------------------------------------------|
| NM_005221.5    | DLX5      | 5.424 | Homo sapiens distal-less homeobox 5 (DLX5), mRNA.                                                                                                   |
| NM_024841.3    | FLJ14213  | 5.424 | Homo sapiens protor-2 (FLJ14213), mRNA.                                                                                                             |
| NM_004154.3    | P2RY6     | 5.394 | Homo sapiens pyrimidineric receptor P2Y, G-protein coupled, 6 (P2RY6), transcript variant 4, mRNA.                                                  |
| NM_005228.3    | EGFR      | 5.382 | Homo sapiens epidermal growth factor receptor (erythroblastic leukemia viral (v-erb-b) oncogene homolog, avian) (EGFR), transcript variant 1, mRNA. |
| NM_002414.3    | CD99      | 5.382 | Homo sapiens CD99 molecule (CD99), transcript variant 1, mRNA.                                                                                      |
| NM_006129.2    | BMP1      | 5.346 | Homo sapiens bone morphogenetic protein 1 (BMP1), transcript variant BMP1-3, mRNA.                                                                  |
| NM_005141.2    | FGB       | 5.340 | Homo sapiens fibrinogen beta chain (FGB), mRNA.                                                                                                     |
| NM_030665.3    | RAI1      | 5.331 | Homo sapiens retinoic acid induced 1 (RAI1), mRNA.                                                                                                  |
| NM_002581.3    | PAPPA     | 5.331 | Homo sapiens pregnancy-associated plasma protein A, pappalysin 1 (PAPPA), mRNA.                                                                     |
| NM_002845.2    | PTPRM     | 5.323 | Homo sapiens protein tyrosine phosphatase, receptor type, M (PTPRM), mRNA.                                                                          |
| NM_018469.3    | TEX2      | 5.318 | Homo sapiens testis expressed 2 (TEX2), mRNA.                                                                                                       |
| NM_006203.3    | PDE4D     | 5.315 | Homo sapiens phosphodiesterase 4D, cAMP-specific (phosphodiesterase E3 dunce homolog, Drosophila) (PDE4D), mRNA.                                    |
| XM_001723978.1 | SPNS2     | 5.308 | PREDICTED: Homo sapiens spinster homolog 2 (Drosophila) (SPNS2), mRNA.                                                                              |
| NM_006290.2    | TNFAIP3   | 5.299 | Homo sapiens tumor necrosis factor, alpha-induced protein 3 (TNFAIP3), mRNA.                                                                        |
| XM_001726959.1 | KRT18P13  | 5.278 | PREDICTED: Homo sapiens keratin 18 pseudogene 13 (KRT18P13), mRNA.                                                                                  |
| NM_001996.2    | FBLN1     | 5.258 | Homo sapiens fibulin 1 (FBLN1), transcript variant C, mRNA.                                                                                         |
| NM_182827.1    | FKBP9L    | 5.248 | Homo sapiens FK506 binding protein 9-like (FKBP9L), mRNA.                                                                                           |
| XM_001716667.1 | LOC731932 | 5.220 | PREDICTED: Homo sapiens hypothetical LOC731932 (LOC731932), mRNA.                                                                                   |
| NM_003722.3    | TP73L     | 5.217 | Homo sapiens tumor protein p73-like (TP73L), mRNA.                                                                                                  |
| NM_003387.3    | WASPIP    | 5.215 | Homo sapiens Wiskott-Aldrich syndrome protein interacting protein (WASPIP), mRNA.                                                                   |
| NM_032041.1    | NCALD     | 5.211 | Homo sapiens neurocalcin delta (NCALD), mRNA.                                                                                                       |
| NM_178507.2    | OAF       | 5.210 | Homo sapiens OAF homolog (Drosophila) (OAF), mRNA.                                                                                                  |
| NM_144729.1    | DUSP10    | 5.183 | Homo sapiens dual specificity phosphatase 10 (DUSP10), transcript variant 3, mRNA.                                                                  |
| NM_080818.3    | OXGR1     | 5.178 | Homo sapiens oxoglutarate (alpha-ketoglutarate) receptor 1 (OXGR1), mRNA.                                                                           |
| NM_005159.4    | ACTC1     | 5.169 | Homo sapiens actin, alpha, cardiac muscle 1 (ACTC1), mRNA.                                                                                          |
| NM_003118.2    | SPARC     | 5.157 | Homo sapiens secreted protein, acidic, cysteine-rich (osteonectin) (SPARC), mRNA.                                                                   |
| NM_014391.2    | ANKRD1    | 5.154 | Homo sapiens ankyrin repeat domain 1 (cardiac muscle) (ANKRD1), mRNA.                                                                               |
| NM_004067.2    | CHN2      | 5.133 | Homo sapiens chimerin (chimaerin) 2 (CHN2), transcript variant 2, mRNA.                                                                             |
| NM_016269.2    | LEF1      | 5.133 | Homo sapiens lymphoid enhancer-binding factor 1 (LEF1), mRNA.                                                                                       |
| NM_006096.2    | NDRG1     | 5.133 | Homo sapiens N-myc downstream regulated gene 1 (NDRG1), mRNA.                                                                                       |
| NM_152330.2    | FRMD6     | 5.130 | Homo sapiens FERM domain containing 6 (FRMD6), mRNA.                                                                                                |
| NM_138455.2    | CTHRC1    | 5.119 | Homo sapiens collagen triple helix repeat containing 1 (CTHRC1), mRNA.                                                                              |
| NM_018712.2    | ELMOD1    | 5.114 | Homo sapiens ELMO/CED-12 domain containing 1 (ELMOD1), mRNA.                                                                                        |



|                |           |       |                                                                                                                                   |
|----------------|-----------|-------|-----------------------------------------------------------------------------------------------------------------------------------|
| NM_000891.2    | KCNJ2     | 5.113 | Homo sapiens potassium inwardly-rectifying channel, subfamily J, member 2 (KCNJ2), mRNA.                                          |
| NM_174911.3    | FAM84B    | 5.105 | Homo sapiens family with sequence similarity 84, member B (FAM84B), mRNA.                                                         |
| NM_173624.1    | FLJ40504  | 5.102 | Homo sapiens hypothetical protein FLJ40504 (FLJ40504), mRNA.                                                                      |
| NM_147780.2    | CTSB      | 5.084 | Homo sapiens cathepsin B (CTSB), transcript variant 2, mRNA.                                                                      |
| NM_207361.4    | FREM2     | 5.082 | Homo sapiens FRAS1 related extracellular matrix protein 2 (FREM2), mRNA.                                                          |
| NM_007361.3    | NID2      | 5.074 | Homo sapiens nidogen 2 (osteonidogen) (NID2), mRNA.                                                                               |
| NM_001684.3    | ATP2B4    | 5.073 | Homo sapiens ATPase, Ca <sup>++</sup> transporting, plasma membrane 4 (ATP2B4), transcript variant 2, mRNA.                       |
| NM_004864.1    | GDF15     | 5.069 | Homo sapiens growth differentiation factor 15 (GDF15), mRNA.                                                                      |
| NM_018110.2    | DOK4      | 5.058 | Homo sapiens docking protein 4 (DOK4), mRNA.                                                                                      |
| NM_004936.3    | CDKN2B    | 5.048 | Homo sapiens cyclin-dependent kinase inhibitor 2B (p15, inhibits CDK4) (CDKN2B), transcript variant 1, mRNA.                      |
| NM_001003396.1 | TPD52L1   | 5.045 | Homo sapiens tumor protein D52-like 1 (TPD52L1), transcript variant 3, mRNA.                                                      |
| NM_016269.2    | LEF1      | 5.042 | Homo sapiens lymphoid enhancer-binding factor 1 (LEF1), mRNA.                                                                     |
| NM_005097.1    | LGI1      | 5.037 | Homo sapiens leucine-rich, glioma inactivated 1 (LGI1), mRNA.                                                                     |
| XR_017100.2    | LOC149501 | 5.036 | PREDICTED: Homo sapiens misc_RNA (LOC149501), miscRNA.                                                                            |
| XR_017543.1    | LOC400578 | 5.035 | PREDICTED: Homo sapiens similar to Keratin, type I cytoskeletal 14 (Cytokeratin-14) (CK-14) (Keratin-14) (K14) (LOC400578), mRNA. |
| NM_130851.1    | BMP4      | 5.034 | Homo sapiens bone morphogenetic protein 4 (BMP4), transcript variant 3, mRNA.                                                     |
| NM_001032394.1 | GPR126    | 5.030 | Homo sapiens G protein-coupled receptor 126 (GPR126), transcript variant a2, mRNA.                                                |
| NM_004530.2    | MMP2      | 5.025 | Homo sapiens matrix metalloproteinase 2 (gelatinase A, 72kDa gelatinase, 72kDa type IV collagenase) (MMP2), mRNA.                 |
| NM_003633.1    | ENC1      | 5.016 | Homo sapiens ectodermal-neural cortex (with BTB-like domain) (ENC1), mRNA.                                                        |
| NM_014365.2    | HSPB8     | 5.005 | Homo sapiens heat shock 22kDa protein 8 (HSPB8), mRNA.                                                                            |
| NM_019605.2    | SERTAD4   | 4.996 | Homo sapiens SERTA domain containing 4 (SERTAD4), mRNA.                                                                           |
| NM_032777.6    | GPR124    | 4.989 | Homo sapiens G protein-coupled receptor 124 (GPR124), mRNA.                                                                       |
| NM_007112.3    | THBS3     | 4.987 | Homo sapiens thrombospondin 3 (THBS3), mRNA.                                                                                      |
| NM_033274.2    | ADAM19    | 4.982 | Homo sapiens ADAM metalloproteinase domain 19 (meltrin beta) (ADAM19), mRNA.                                                      |
| NM_001017974.1 | P4HA2     | 4.974 | Homo sapiens prolyl 4-hydroxylase, alpha polypeptide II (P4HA2), transcript variant 3, mRNA.                                      |
| NM_001001396.1 | ATP2B4    | 4.967 | Homo sapiens ATPase, Ca <sup>++</sup> transporting, plasma membrane 4 (ATP2B4), transcript variant 1, mRNA.                       |
| NM_000104.2    | CYP1B1    | 4.965 | Homo sapiens cytochrome P450, family 1, subfamily B, polypeptide 1 (CYP1B1), mRNA.                                                |
| NM_014322.2    | OPN3      | 4.925 | Homo sapiens opsin 3 (OPN3), mRNA.                                                                                                |
| NM_001629.2    | ALOX5AP   | 4.918 | Homo sapiens arachidonate 5-lipoxygenase-activating protein (ALOX5AP), mRNA.                                                      |
| NM_005605.3    | PPP3CC    | 4.901 | Homo sapiens protein phosphatase 3 (formerly 2B), catalytic subunit, gamma isoform (PPP3CC), mRNA.                                |
| NM_000422.1    | KRT17     | 4.895 | Homo sapiens keratin 17 (KRT17), mRNA.                                                                                            |
| NM_014900.3    | COBLL1    | 4.884 | Homo sapiens COBL-like 1 (COBLL1), mRNA.                                                                                          |
| NM_000602.1    | SERPINE1  | 4.881 | Homo sapiens serpin peptidase inhibitor, clade E (nexin, plasminogen activator inhibitor type 1), member 1 (SERPINE1), mRNA.      |

|                |              |       |                                                                                                                                              |
|----------------|--------------|-------|----------------------------------------------------------------------------------------------------------------------------------------------|
| XR_017689.1    | KRT18P28     | 4.881 | PREDICTED: Homo sapiens misc_RNA (KRT18P28), miscRNA.                                                                                        |
| NM_021170.2    | HES4         | 4.856 | Homo sapiens hairy and enhancer of split 4 (Drosophila) (HES4), mRNA.                                                                        |
| NM_033504.2    | TMEM54       | 4.853 | Homo sapiens transmembrane protein 54 (TMEM54), mRNA.                                                                                        |
| NM_020877.2    | DNAH2        | 4.836 | Homo sapiens dynein, axonemal, heavy chain 2 (DNAH2), mRNA.                                                                                  |
| NM_031439.2    | SOX7         | 4.835 | Homo sapiens SRY (sex determining region Y)-box 7 (SOX7), mRNA.                                                                              |
| NM_018012.2    | KIF26B       | 4.833 | Homo sapiens kinesin family member 26B (KIF26B), mRNA.                                                                                       |
| NM_017633.2    | FAM46A       | 4.813 | Homo sapiens family with sequence similarity 46, member A (FAM46A), mRNA.                                                                    |
| NM_019885.2    | CYP26B1      | 4.804 | Homo sapiens cytochrome P450, family 26, subfamily B, polypeptide 1 (CYP26B1), mRNA.                                                         |
| NM_024767.2    | DLC1         | 4.764 | Homo sapiens deleted in liver cancer 1 (DLC1), transcript variant 3, mRNA.                                                                   |
| NM_018890.2    | RAC1         | 4.757 | Homo sapiens ras-related C3 botulinum toxin substrate 1 (rho family, small GTP binding protein Rac1) (RAC1), transcript variant Rac1b, mRNA. |
| NM_001873.1    | CPE          | 4.737 | Homo sapiens carboxypeptidase E (CPE), mRNA.                                                                                                 |
| BC062365       |              | 4.734 | Homo sapiens cDNA clone IMAGE:5922621, partial cds                                                                                           |
| NM_002780.3    | PSG4         | 4.720 | Homo sapiens pregnancy specific beta-1-glycoprotein 4 (PSG4), transcript variant 1, mRNA.                                                    |
| NM_004525.2    | LRP2         | 4.719 | Homo sapiens low density lipoprotein-related protein 2 (LRP2), mRNA.                                                                         |
| NM_005491.2    | MAMLD1       | 4.714 | Homo sapiens mastermind-like domain containing 1 (MAMLD1), mRNA.                                                                             |
| NM_003480.2    | MFAP5        | 4.704 | Homo sapiens microfibrillar associated protein 5 (MFAP5), mRNA.                                                                              |
| NM_005139.2    | ANXA3        | 4.669 | Homo sapiens annexin A3 (ANXA3), mRNA.                                                                                                       |
| XR_017241.1    | LOC646723    | 4.698 | PREDICTED: Homo sapiens similar to Keratin, type I cytoskeletal 18 (Cytokeratin-18) (CK-18) (Keratin-18) (K18) (LOC646723), mRNA.            |
| NM_138444.3    | KCTD12       | 4.687 | Homo sapiens potassium channel tetramerisation domain containing 12 (KCTD12), mRNA.                                                          |
| NM_001098816.2 | ODZ4         | 4.681 | Homo sapiens odz, odd Oz/ten-m homolog 4 (Drosophila) (ODZ4), mRNA.                                                                          |
| NM_153427.1    | PITX2        | 4.679 | Homo sapiens paired-like homeodomain 2 (PITX2), transcript variant 1, mRNA.                                                                  |
| NM_015130.2    | TBC1D9       | 4.654 | Homo sapiens TBC1 domain family, member 9 (with GRAM domain) (TBC1D9), mRNA.                                                                 |
| NM_015245.2    | ANKS1A       | 4.625 | Homo sapiens ankyrin repeat and sterile alpha motif domain containing 1A (ANKS1A), mRNA.                                                     |
| NM_021073.2    | BMP5         | 4.614 | Homo sapiens bone morphogenetic protein 5 (BMP5), mRNA.                                                                                      |
| XR_015970.1    | MGC102966    | 4.610 | PREDICTED: Homo sapiens similar to Keratin, type I cytoskeletal 16 (Cytokeratin-16) (CK-16) (Keratin-16) (K16) (MGC102966), misc RNA.        |
| NM_004173.2    | SLC7A4       | 4.602 | Homo sapiens solute carrier family 7 (cationic amino acid transporter, y+ system), member 4 (SLC7A4), mRNA.                                  |
| NM_012307.2    | EPB41L3      | 4.601 | Homo sapiens erythrocyte membrane protein band 4.1-like 3 (EPB41L3), mRNA.                                                                   |
| NM_024702.2    | ZNF750       | 4.579 | Homo sapiens zinc finger protein 750 (ZNF750), mRNA.                                                                                         |
| NM_005211.2    | CSF1R        | 4.570 | Homo sapiens colony stimulating factor 1 receptor, formerly McDonough feline sarcoma viral (v-fms) oncogene homolog (CSF1R), mRNA.           |
| XM_001724386.1 | LOC100134265 | 4.564 | PREDICTED: Homo sapiens similar to calbindin 2 full length protein (LOC100134265), mRNA.                                                     |
| NM_032181.1    | TMEM166      | 4.559 | Homo sapiens transmembrane protein 166 (TMEM166), mRNA.                                                                                      |

|                |          |       |                                                                                                                          |
|----------------|----------|-------|--------------------------------------------------------------------------------------------------------------------------|
| XR_017231.2    | KRT8P9   | 4.554 | PREDICTED: Homo sapiens misc_RNA (KRT8P9), miscRNA.                                                                      |
| NM_006403.2    | NEDD9    | 4.552 | Homo sapiens neural precursor cell expressed, developmentally down-regulated 9 (NEDD9), transcript variant 1, mRNA.      |
| NM_177964.3    | LYPD6B   | 4.546 | Homo sapiens LY6/PLAUR domain containing 6B (LYPD6B), mRNA.                                                              |
| NM_152611.3    | LRRN4    | 4.540 | Homo sapiens leucine rich repeat neuronal 4 (LRRN4), mRNA.                                                               |
| NM_001099287.1 | NIPAL4   | 4.530 | Homo sapiens NIPA-like domain containing 4 (NIPAL4), mRNA.                                                               |
| NM_003380.2    | VIM      | 4.529 | Homo sapiens vimentin (VIM), mRNA.                                                                                       |
| NR_001562.1    | ANXA2P1  | 4.524 | Homo sapiens annexin A2 pseudogene 1 (ANXA2P1) on chromosome 4.                                                          |
| NM_006270.3    | RRAS     | 4.518 | Homo sapiens related RAS viral (r-ras) oncogene homolog (RRAS), mRNA.                                                    |
| NM_000474.3    | TWIST1   | 4.510 | Homo sapiens twist homolog 1 (Drosophila) (TWIST1), mRNA.                                                                |
| NM_001040619.1 | ATF3     | 4.506 | Homo sapiens activating transcription factor 3 (ATF3), transcript variant 4, mRNA.                                       |
| NM_002781.2    | PSG5     | 4.493 | Homo sapiens pregnancy specific beta-1-glycoprotein 5 (PSG5), mRNA.                                                      |
| NM_001748.3    | CAPN2    | 4.492 | Homo sapiens calpain 2, (m/II) large subunit (CAPN2), mRNA.                                                              |
| NM_207336.1    | ZNF467   | 4.488 | Homo sapiens zinc finger protein 467 (ZNF467), mRNA.                                                                     |
| NM_002966.1    | S100A10  | 4.478 | Homo sapiens S100 calcium binding protein A10 (annexin II ligand, calpactin I, light polypeptide (p11)) (S100A10), mRNA. |
| NM_022059.1    | CXCL16   | 4.474 | Homo sapiens chemokine (C-X-C motif) ligand 16 (CXCL16), mRNA.                                                           |
| NM_020387.2    | RAB25    | 4.457 | Homo sapiens RAB25, member RAS oncogene family (RAB25), mRNA.                                                            |
| NM_002051.2    | GATA3    | 4.440 | Homo sapiens GATA binding protein 3 (GATA3), transcript variant 2, mRNA.                                                 |
| NM_212474.1    | FN1      | 4.435 | Homo sapiens fibronectin 1 (FN1), transcript variant 6, mRNA.                                                            |
| NM_197941.2    | ADAMTS6  | 4.420 | Homo sapiens ADAM metalloproteinase with thrombospondin type 1 motif, 6 (ADAMTS6), mRNA.                                 |
| XM_001128419.1 | MGC16121 | 4.414 | PREDICTED: Homo sapiens hypothetical protein MGC16121 (MGC16121), mRNA.                                                  |
| NM_032199.1    | ARID5B   | 4.407 | Homo sapiens AT rich interactive domain 5B (MRF1-like) (ARID5B), mRNA.                                                   |
| NM_001908.3    | CTSB     | 4.406 | Homo sapiens cathepsin B (CTSB), transcript variant 1, mRNA.                                                             |
| NM_002048.1    | GAS1     | 4.400 | Homo sapiens growth arrest-specific 1 (GAS1), mRNA.                                                                      |
| NM_000679.3    | ADRA1B   | 4.398 | Homo sapiens adrenergic, alpha-1B-, receptor (ADRA1B), mRNA.                                                             |
| NM_001265.2    | CDX2     | 4.384 | Homo sapiens caudal type homeobox 2 (CDX2), mRNA.                                                                        |
| NM_001008490.1 | KLF6     | 4.384 | Homo sapiens Kruppel-like factor 6 (KLF6), transcript variant 1, mRNA.                                                   |
| NM_001999.3    | FBN2     | 4.382 | Homo sapiens fibrillin 2 (FBN2), mRNA.                                                                                   |
| NM_001233.3    | CAV2     | 4.370 | Homo sapiens caveolin 2 (CAV2), transcript variant 1, mRNA.                                                              |
| NM_152330.3    | FRMD6    | 4.368 | Homo sapiens FERM domain containing 6 (FRMD6), transcript variant 2, mRNA.                                               |
| NM_018689.1    | KIAA1199 | 4.367 | Homo sapiens KIAA1199 (KIAA1199), mRNA.                                                                                  |
| NM_001034841.2 | ITPRIPL2 | 4.360 | Homo sapiens inositol 1,4,5-triphosphate receptor interacting protein-like 2 (ITPRIPL2), mRNA.                           |
| XR_037953.1    | KRT18P17 | 4.326 | PREDICTED: Homo sapiens misc_RNA (KRT18P17), miscRNA.                                                                    |
| NM_003174.3    | SVIL     | 4.320 | Homo sapiens supervillin (SVIL), transcript variant 1, mRNA.                                                             |
| NM_000963.1    | PTGS2    | 4.317 | Homo sapiens prostaglandin-endoperoxide synthase 2 (prostaglandin G/H synthase and cyclooxygenase) (PTGS2), mRNA.        |
| NM_152680.1    | TMEM154  | 4.314 | Homo sapiens transmembrane protein 154 (TMEM154), mRNA.                                                                  |

|                |              |       |                                                                                                            |
|----------------|--------------|-------|------------------------------------------------------------------------------------------------------------|
| NM_005556.3    | KRT7         | 4.304 | Homo sapiens keratin 7 (KRT7), mRNA.                                                                       |
| NM_006528.2    | TFPI2        | 4.291 | Homo sapiens tissue factor pathway inhibitor 2 (TFPI2), mRNA.                                              |
| NM_182909.2    | FILIP1L      | 4.288 | Homo sapiens filamin A interacting protein 1-like (FILIP1L), transcript variant 1, mRNA.                   |
| NM_001008844.1 | DSP          | 4.283 | Homo sapiens desmoplakin (DSP), transcript variant 2, mRNA.                                                |
| NM_000099.2    | CST3         | 4.278 | Homo sapiens cystatin C (CST3), mRNA.                                                                      |
| NM_177964.3    | LYPD6B       | 4.262 | Homo sapiens LY6/PLAUR domain containing 6B (LYPD6B), mRNA.                                                |
| NM_005328.1    | HAS2         | 4.253 | Homo sapiens hyaluronan synthase 2 (HAS2), mRNA.                                                           |
| NM_080388.1    | S100A16      | 4.240 | Homo sapiens S100 calcium binding protein A16 (S100A16), mRNA.                                             |
| NM_144729.1    | DUSP10       | 4.232 | Homo sapiens dual specificity phosphatase 10 (DUSP10), transcript variant 3, mRNA.                         |
| NM_032784.3    | RSPO3        | 4.210 | Homo sapiens R-spondin 3 homolog (Xenopus laevis) (RSPO3), mRNA.                                           |
| AB074162       |              | 4.192 | Homo sapiens primary neuroblastoma cDNA, clone:Nbla10527, full insert sequence                             |
| NM_001099743.1 | GOLSYN       | 4.189 | Homo sapiens Golgi-localized protein (GOLSYN), transcript variant 7, mRNA.                                 |
| NM_022051.1    | EGLN1        | 4.184 | Homo sapiens egl nine homolog 1 (C. elegans) (EGLN1), mRNA.                                                |
| NM_005585.3    | SMAD6        | 4.181 | Homo sapiens SMAD family member 6 (SMAD6), transcript variant 1, mRNA.                                     |
| NM_004172.3    | SLC1A3       | 4.177 | Homo sapiens solute carrier family 1 (glial high affinity glutamate transporter), member 3 (SLC1A3), mRNA. |
| NM_001024074.1 | HNMT         | 4.166 | Homo sapiens histamine N-methyltransferase (HNMT), transcript variant 2, mRNA.                             |
| NM_032873.4    | UBASH3B      | 4.162 | Homo sapiens ubiquitin associated and SH3 domain containing, B (UBASH3B), mRNA.                            |
| NM_148957.2    | TNFRSF19     | 4.156 | Homo sapiens tumor necrosis factor receptor superfamily, member 19 (TNFRSF19), transcript variant 2, mRNA. |
| NM_015869.4    | PPARG        | 4.155 | Homo sapiens peroxisome proliferator-activated receptor gamma (PPARG), transcript variant 2, mRNA.         |
| NM_005318.2    | H1FO         | 4.154 | Homo sapiens H1 histone family, member 0 (H1FO), mRNA.                                                     |
| NM_005461.3    | MAFB         | 4.149 | Homo sapiens v-maf musculoaponeurotic fibrosarcoma oncogene homolog B (avian) (MAFB), mRNA.                |
| NM_001040058.1 | SPP1         | 4.148 | Homo sapiens secreted phosphoprotein 1 (SPP1), transcript variant 1, mRNA.                                 |
| NM_004787.1    | SLIT2        | 4.146 | Homo sapiens slit homolog 2 (Drosophila) (SLIT2), mRNA.                                                    |
| NM_004364.2    | CEBPA        | 4.145 | Homo sapiens CCAAT/enhancer binding protein (C/EBP), alpha (CEBPA), mRNA.                                  |
| NM_001542.2    | IGSF3        | 4.138 | Homo sapiens immunoglobulin superfamily, member 3 (IGSF3), transcript variant 1, mRNA.                     |
| NM_001002858.1 | ANXA2        | 4.128 | Homo sapiens annexin A2 (ANXA2), transcript variant 1, mRNA.                                               |
| XM_001722168.1 | LOC100128893 | 4.126 | PREDICTED: Homo sapiens hypothetical protein LOC100128893 (LOC100128893), mRNA.                            |
| NM_030952.1    | NUAK2        | 4.127 | Homo sapiens NUAK family, SNF1-like kinase, 2 (NUAK2), mRNA.                                               |
| NM_004884.3    | IGDCC3       | 4.108 | Homo sapiens immunoglobulin superfamily, DCC subclass, member 3 (IGDCC3), mRNA.                            |
| NM_000943.4    | PPIC         | 4.102 | Homo sapiens peptidylprolyl isomerase C (cyclophilin C) (PPIC), mRNA.                                      |
| NM_021245.2    | MYOZ1        | 4.099 | Homo sapiens myozenin 1 (MYOZ1), mRNA.                                                                     |
| NM_005797.2    | MPZL2        | 4.097 | Homo sapiens myelin protein zero-like 2 (MPZL2), transcript variant 1, mRNA.                               |
| NM_024935.2    | KIAA1772     | 4.092 | Homo sapiens KIAA1772 (KIAA1772), mRNA.                                                                    |

|             |           |       |                                                                  |
|-------------|-----------|-------|------------------------------------------------------------------|
| NR_029622.1 | MIR205    | 4.054 | Homo sapiens microRNA 205 (MIR205), microRNA.                    |
| NM_178497.2 | C4orf26   | 4.052 | Homo sapiens chromosome 4 open reading frame 26 (C4orf26), mRNA. |
| NM_003380.2 | VIM       | 4.048 | Homo sapiens vimentin (VIM), mRNA.                               |
| NM_025179.3 | PLXNA2    | 4.043 | Homo sapiens plexin A2 (PLXNA2), mRNA.                           |
| NR_024430.1 | LOC399959 | 4.032 | Homo sapiens hypothetical LOC399959 (LOC399959), non-coding RNA. |

**Supplementary table 4: Genes up regulated in Day 0 as compared to Day 20**

| Refseq_NM      | GeneSymbol | D20/D12.fc | DEFINITION                                                                                                                     |
|----------------|------------|------------|--------------------------------------------------------------------------------------------------------------------------------|
| NM_002522.2    | NPTX1      | -23.785456 | Homo sapiens neuronal pentraxin I (NPTX1), mRNA.                                                                               |
| NM_000840.2    | GRM3       | -12.592607 | Homo sapiens glutamate receptor, metabotropic 3 (GRM3), mRNA.                                                                  |
| NM_002164.3    | INDO       | -9.18744   | Homo sapiens indoleamine-pyrrole 2,3 dioxygenase (INDO), mRNA.                                                                 |
| NM_002164.4    | IDO1       | -8.705727  | Homo sapiens indoleamine 2,3-dioxygenase 1 (IDO1), mRNA.                                                                       |
| NM_022034.4    | CUZD1      | -8.256749  | Homo sapiens CUB and zona pellucida-like domains 1 (CUZD1), mRNA.                                                              |
| AL833138       |            | -8.009543  | Homo sapiens mRNA; cDNA DKFZp313A1040 (from clone DKFZp313A1040)                                                               |
| NM_003706.1    | PLA2G4C    | -7.624982  | Homo sapiens phospholipase A2, group IVC (cytosolic, calcium-independent) (PLA2G4C), mRNA.                                     |
| NM_014279.4    | OLFM1      | -7.000224  | Homo sapiens olfactomedin 1 (OLFM1), transcript variant 1, mRNA.                                                               |
| NM_152779.2    | GLIPR1L1   | -6.795108  | Homo sapiens GLI pathogenesis-related 1 like 1 (GLIPR1L1), mRNA.                                                               |
| NM_022144.1    | TNMD       | -6.461491  | Homo sapiens tenomodulin (TNMD), mRNA.                                                                                         |
| AL049310       |            | -6.364673  | Homo sapiens mRNA; cDNA DKFZp564B206 (from clone DKFZp564B206)                                                                 |
| NM_198139.1    | SEMG1      | -6.140634  | Homo sapiens semenogelin I (SEMG1), transcript variant 2, mRNA.                                                                |
| NM_005296.1    | LPAR4      | -6.126293  | Homo sapiens lysophosphatidic acid receptor 4 (LPAR4), mRNA.                                                                   |
| NM_007015.2    | LECT1      | -5.996149  | Homo sapiens leukocyte cell derived chemotaxin 1 (LECT1), transcript variant 1, mRNA.                                          |
| NM_138328.2    | RHBDL3     | -5.585974  | Homo sapiens rhomboid, veinlet-like 3 (Drosophila) (RHBDL3), mRNA.                                                             |
| NM_005756.2    | GPR64      | -5.390976  | Homo sapiens G protein-coupled receptor 64 (GPR64), transcript variant 4, mRNA.                                                |
| NM_007015.2    | LECT1      | -5.387534  | Homo sapiens leukocyte cell derived chemotaxin 1 (LECT1), transcript variant 1, mRNA.                                          |
| NM_004744.3    | LRAT       | -5.037117  | Homo sapiens lecithin retinol acyltransferase (phosphatidylcholine--retinol O-acyltransferase) (LRAT), mRNA.                   |
| NM_003459.4    | SLC30A3    | -4.943123  | Homo sapiens solute carrier family 30 (zinc transporter), member 3 (SLC30A3), mRNA.                                            |
| NM_002993.2    | CXCL6      | -4.874339  | Homo sapiens chemokine (C-X-C motif) ligand 6 (granulocyte chemotactic protein 2) (CXCL6), mRNA.                               |
| NM_015715.3    | PLA2G3     | -4.846862  | Homo sapiens phospholipase A2, group III (PLA2G3), mRNA.                                                                       |
| NM_006334.3    | OLFM1      | -4.819602  | Homo sapiens olfactomedin 1 (OLFM1), transcript variant 2, mRNA.                                                               |
| NM_001964.2    | EGR1       | -4.687462  | Homo sapiens early growth response 1 (EGR1), mRNA.                                                                             |
| NM_015184.3    | PLCL2      | -4.648604  | Homo sapiens phospholipase C-like 2 (PLCL2), mRNA.                                                                             |
| NM_013244.2    | MGAT4C     | -4.449936  | Homo sapiens mannosyl (alpha-1,3-)-glycoprotein beta-1,4-N-acetylglucosaminyltransferase, isozyme C (putative) (MGAT4C), mRNA. |
| NM_002006.3    | FGF2       | -4.440724  | Homo sapiens fibroblast growth factor 2 (basic) (FGF2), mRNA.                                                                  |
| NM_172337.1    | OTX2       | -4.430574  | Homo sapiens orthodenticle homeobox 2 (OTX2), transcript variant 2, mRNA.                                                      |
| NM_001217.3    | CA11       | -4.404762  | Homo sapiens carbonic anhydrase XI (CA11), mRNA.                                                                               |
| XR_039453.1    | LOC646316  | -4.401608  | PREDICTED: Homo sapiens misc_RNA (LOC646316), miscRNA.                                                                         |
| NM_003541.2    | HIST1H4K   | -4.399901  | Homo sapiens histone cluster 1, H4k (HIST1H4K), mRNA.                                                                          |
| NM_003524.2    | HIST1H2BH  | -4.354731  | Homo sapiens histone cluster 1, H2bh (HIST1H2BH), mRNA.                                                                        |
| NM_013243.2    | SCG3       | -4.341447  | Homo sapiens secretogranin III (SCG3), mRNA.                                                                                   |
| NM_018228.1    | C14orf115  | -4.299288  | Homo sapiens chromosome 14 open reading frame 115 (C14orf115), mRNA.                                                           |
| NM_032446.1    | MEGF10     | -4.280219  | Homo sapiens multiple EGF-like-domains 10 (MEGF10), mRNA.                                                                      |
| NM_001079859.1 | GPR64      | -4.252518  | Homo sapiens G protein-coupled receptor 64 (GPR64), transcript variant 2, mRNA.                                                |
| NM_003106.2    | SOX2       | -4.239885  | Homo sapiens SRY (sex determining region Y)-box 2 (SOX2), mRNA.                                                                |
| NM_013243.2    | SCG3       | -4.183976  | Homo sapiens secretogranin III (SCG3), mRNA.                                                                                   |
| NM_000399.2    | EGR2       | -4.146733  | Homo sapiens early growth response 2 (Krox-20 homolog, Drosophila) (EGR2), mRNA.                                               |
| NM_181876.2    | PPP2R2C    | -4.127478  | Homo sapiens protein phosphatase 2 (formerly 2A), regulatory subunit B, gamma isoform (PPP2R2C), transcript variant 2, mRNA.   |
| NM_005634.2    | SOX3       | -4.107444  | Homo sapiens SRY (sex determining region Y)-box 3 (SOX3), mRNA.                                                                |

|                |           |           |                                                                                                                                   |
|----------------|-----------|-----------|-----------------------------------------------------------------------------------------------------------------------------------|
| NM_004734.2    | DCLK1     | -4.094267 | Homo sapiens doublecortin-like kinase 1 (DCLK1), mRNA.                                                                            |
| NM_001042403.1 | USP44     | -4.083442 | Homo sapiens ubiquitin specific peptidase 44 (USP44), transcript variant 2, mRNA.                                                 |
| XM_939725.2    | LOC654127 | -4.04052  | PREDICTED: Homo sapiens similar to adaptor-related protein complex 1 sigma 2 subunit (LOC654127), mRNA.                           |
| NM_004538.3    | NAP1L3    | -4.008645 | Homo sapiens nucleosome assembly protein 1-like 3 (NAP1L3), mRNA.                                                                 |
| AF038185       |           | -3.935115 | Homo sapiens clone 23700 mRNA sequence                                                                                            |
| NM_080390.3    | TCEAL2    | -3.925044 | Homo sapiens transcription elongation factor A (SII)-like 2 (TCEAL2), mRNA.                                                       |
| NM_032884.2    | C1orf94   | -3.893483 | Homo sapiens chromosome 1 open reading frame 94 (C1orf94), mRNA.                                                                  |
| NM_000216.2    | KAL1      | -3.884991 | Homo sapiens Kallmann syndrome 1 sequence (KAL1), mRNA.                                                                           |
| NM_012419.4    | RGS17     | -3.861182 | Homo sapiens regulator of G-protein signaling 17 (RGS17), mRNA.                                                                   |
| NM_000903.2    | NQO1      | -3.856425 | Homo sapiens NAD(P)H dehydrogenase, quinone 1 (NQO1), transcript variant 1, mRNA.                                                 |
| NM_002851.2    | PTPRZ1    | -3.852374 | Homo sapiens protein tyrosine phosphatase, receptor-type, Z polypeptide 1 (PTPRZ1), mRNA.                                         |
| NM_014474.2    | SMPDL3B   | -3.841301 | Homo sapiens sphingomyelin phosphodiesterase, acid-like 3B (SMPDL3B), transcript variant 1, mRNA.                                 |
| NM_001042403.1 | USP44     | -3.830662 | Homo sapiens ubiquitin specific peptidase 44 (USP44), transcript variant 2, mRNA.                                                 |
| NM_001080430.1 | TOX3      | -3.816378 | Homo sapiens TOX high mobility group box family member 3 (TOX3), mRNA.                                                            |
| NM_004734.2    | DCLK1     | -3.778323 | Homo sapiens doublecortin-like kinase 1 (DCLK1), mRNA.                                                                            |
| NM_153034.2    | ZNF488    | -3.778085 | Homo sapiens zinc finger protein 488 (ZNF488), mRNA.                                                                              |
| NM_004430.2    | EGR3      | -3.770779 | Homo sapiens early growth response 3 (EGR3), mRNA.                                                                                |
| NM_002523.1    | NPTX2     | -3.768543 | Homo sapiens neuronal pentraxin II (NPTX2), mRNA.                                                                                 |
| NM_003106.2    | SOX2      | -3.749071 | Homo sapiens SRY (sex determining region Y)-box 2 (SOX2), mRNA.                                                                   |
| NM_172337.1    | OTX2      | -3.719339 | Homo sapiens orthodenticle homeobox 2 (OTX2), transcript variant 2, mRNA.                                                         |
| NM_152737.2    | RNF182    | -3.639525 | Homo sapiens ring finger protein 182 (RNF182), mRNA.                                                                              |
| NM_021127.1    | PMAIP1    | -3.618855 | Homo sapiens phorbol-12-myristate-13-acetate-induced protein 1 (PMAIP1), mRNA.                                                    |
| NM_024629.2    | MLF1IP    | -3.608929 | Homo sapiens MLF1 interacting protein (MLF1IP), mRNA.                                                                             |
| NM_020742.2    | NLGN4X    | -3.574269 | Homo sapiens neuroligin 4, X-linked (NLGN4X), transcript variant 1, mRNA.                                                         |
| NM_032803.4    | SLC7A3    | -3.559078 | Homo sapiens solute carrier family 7 (cationic amino acid transporter, y+ system), member 3 (SLC7A3), transcript variant 1, mRNA. |
| NM_020211.1    | RGMA      | -3.537839 | Homo sapiens RGM domain family, member A (RGMA), mRNA.                                                                            |
| XM_001126803.1 | LOC728185 | -3.513769 | PREDICTED: Homo sapiens similar to Gamma-2-syntrophin (G2SYN) (Syntrophin 5) (SYN5) (LOC728185), mRNA.                            |
| NM_002463.1    | MX2       | -3.508532 | Homo sapiens myxovirus (influenza virus) resistance 2 (mouse) (MX2), mRNA.                                                        |
| NM_013244.2    | MGAT4C    | -3.505007 | Homo sapiens mannosyl (alpha-1,3-)-glycoprotein beta-1,4-N-acetylglucosaminyltransferase, isozyme C (putative) (MGAT4C), mRNA.    |
| NM_003865.1    | HESX1     | -3.503672 | Homo sapiens HESX homeobox 1 (HESX1), mRNA.                                                                                       |
| NM_017522.3    | LRP8      | -3.496848 | Homo sapiens low density lipoprotein receptor-related protein 8, apolipoprotein e receptor (LRP8), transcript variant 3, mRNA.    |
| NM_138786.1    | TM4SF18   | -3.481067 | Homo sapiens transmembrane 4 L six family member 18 (TM4SF18), mRNA.                                                              |
| NM_012183.1    | FOXD3     | -3.47938  | Homo sapiens forkhead box D3 (FOXD3), mRNA.                                                                                       |
| NM_012281.2    | KCND2     | -3.47339  | Homo sapiens potassium voltage-gated channel, Shal-related subfamily, member 2 (KCND2), mRNA.                                     |
| NM_007223.1    | GPR176    | -3.473057 | Homo sapiens G protein-coupled receptor 176 (GPR176), mRNA.                                                                       |
| NM_018602.2    | DNAJA4    | -3.46794  | Homo sapiens DnaJ (Hsp40) homolog, subfamily A, member 4 (DNAJA4), mRNA.                                                          |
| NM_032505.1    | KBTBD8    | -3.456858 | Homo sapiens kelch repeat and BTB (POZ) domain containing 8 (KBTBD8), mRNA.                                                       |

|                |           |           |                                                                                                                                           |
|----------------|-----------|-----------|-------------------------------------------------------------------------------------------------------------------------------------------|
| XM_001717875.1 | LOC732445 | -3.436154 | PREDICTED: Homo sapiens similar to alpha 7 neuronal nicotinic acetylcholine receptor (LOC732445), mRNA.                                   |
| NR_003491.1    | MIAT      | -3.429034 | Homo sapiens myocardial infarction associated transcript (non-protein coding) (MIAT), non-coding RNA.                                     |
| NM_005314.2    | GRPR      | -3.415805 | Homo sapiens gastrin-releasing peptide receptor (GRPR), mRNA.                                                                             |
| NM_014692.1    | SEC14L5   | -3.413889 | Homo sapiens SEC14-like 5 ( <i>S. cerevisiae</i> ) (SEC14L5), mRNA.                                                                       |
| NM_004522.1    | KIF5C     | -3.403553 | Homo sapiens kinesin family member 5C (KIF5C), mRNA.                                                                                      |
| NM_001014809.1 | CRMP1     | -3.402081 | Homo sapiens collapsin response mediator protein 1 (CRMP1), transcript variant 1, mRNA.                                                   |
| NM_000517.3    | HBA2      | -3.370179 | Homo sapiens hemoglobin, alpha 2 (HBA2), mRNA.                                                                                            |
| NM_138786.2    | TM4SF18   | -3.345729 | Homo sapiens transmembrane 4 L six family member 18 (TM4SF18), mRNA.                                                                      |
| NM_031845.2    | MAP2      | -3.345285 | Homo sapiens microtubule-associated protein 2 (MAP2), transcript variant 2, mRNA.                                                         |
| NM_182974.2    | GLT6D1    | -3.336456 | Homo sapiens glycosyltransferase 6 domain containing 1 (GLT6D1), mRNA.                                                                    |
| NM_021127.1    | PMAIP1    | -3.33604  | Homo sapiens phorbol-12-myristate-13-acetate-induced protein 1 (PMAIP1), mRNA.                                                            |
| NM_005314.2    | GRPR      | -3.332223 | Homo sapiens gastrin-releasing peptide receptor (GRPR), mRNA.                                                                             |
| NM_032446.1    | MEGF10    | -3.317238 | Homo sapiens multiple EGF-like-domains 10 (MEGF10), mRNA.                                                                                 |
| NM_005407.1    | SALL2     | -3.307194 | Homo sapiens sal-like 2 ( <i>Drosophila</i> ) (SALL2), mRNA.                                                                              |
| NM_178232.2    | HAPLN3    | -3.266422 | Homo sapiens hyaluronan and proteoglycan link protein 3 (HAPLN3), mRNA.                                                                   |
| NM_022652.2    | DUSP6     | -3.265109 | Homo sapiens dual specificity phosphatase 6 (DUSP6), transcript variant 2, mRNA.                                                          |
| NM_145018.2    | C11orf82  | -3.263836 | Homo sapiens chromosome 11 open reading frame 82 (C11orf82), mRNA.                                                                        |
| NM_001048201.1 | UHRF1     | -3.259137 | Homo sapiens ubiquitin-like with PHD and ring finger domains 1 (UHRF1), transcript variant 1, mRNA.                                       |
| NM_015894.2    | STMN3     | -3.258696 | Homo sapiens stathmin-like 3 (STMN3), mRNA.                                                                                               |
| NM_007129.2    | ZIC2      | -3.258283 | Homo sapiens Zic family member 2 (odd-paired homolog, <i>Drosophila</i> ) (ZIC2), mRNA.                                                   |
| NM_001005502.1 | CPM       | -3.255894 | Homo sapiens carboxypeptidase M (CPM), transcript variant 3, mRNA.                                                                        |
| NM_015225.1    | KIAA0367  | -3.252589 | Homo sapiens KIAA0367 (KIAA0367), mRNA.                                                                                                   |
| NM_003218.2    | TERF1     | -3.250534 | Homo sapiens telomeric repeat binding factor (NIMA-interacting) 1 (TERF1), transcript variant 2, mRNA.                                    |
| NM_013364.4    | PNMA3     | -3.247463 | Homo sapiens paraneoplastic antigen MA3 (PNMA3), mRNA.                                                                                    |
| NM_003112.3    | SP4       | -3.232507 | Homo sapiens Sp4 transcription factor (SP4), mRNA.                                                                                        |
| NM_000517.3    | HBA2      | -3.2217   | Homo sapiens hemoglobin, alpha 2 (HBA2), mRNA.                                                                                            |
| XM_001128032.1 | MGC87042  | -3.221503 | PREDICTED: Homo sapiens similar to Six transmembrane epithelial antigen of prostate (MGC87042), mRNA.                                     |
| XM_498560.3    | LOC440132 | -3.192497 | PREDICTED: Homo sapiens hypothetical LOC440132 (LOC440132), mRNA.                                                                         |
| NM_006467.2    | POLR3G    | -3.185516 | Homo sapiens polymerase (RNA) III (DNA directed) polypeptide G (32kD) (POLR3G), mRNA.                                                     |
| NM_181558.2    | RFC3      | -3.184396 | Homo sapiens replication factor C (activator 1) 3, 38kDa (RFC3), transcript variant 2, mRNA.                                              |
| NM_020997.2    | LEFTY1    | -3.183314 | Homo sapiens left-right determination factor 1 (LEFTY1), mRNA.                                                                            |
| NM_001048164.1 | SLC7A3    | -3.180488 | Homo sapiens solute carrier family 7 (cationic amino acid transporter, $\gamma$ + system), member 3 (SLC7A3), transcript variant 2, mRNA. |
| NR_029858.1    | MIR302C   | -3.17265  | Homo sapiens microRNA 302c (MIR302C), microRNA.                                                                                           |
| NM_030763.1    | NSBP1     | -3.172224 | Homo sapiens nucleosomal binding protein 1 (NSBP1), mRNA.                                                                                 |
| NM_017669.2    | ERCC6L    | -3.152213 | Homo sapiens excision repair cross-complementing rodent repair deficiency, complementation group 6-like (ERCC6L), mRNA.                   |
| NM_014474.2    | SMPDL3B   | -3.152068 | Homo sapiens sphingomyelin phosphodiesterase, acid-like 3B (SMPDL3B), transcript variant 1, mRNA.                                         |
| NM_000892.3    | KLKB1     | -3.14934  | Homo sapiens kallikrein B, plasma (Fletcher factor) 1 (KLKB1), mRNA.                                                                      |



|                |           |           |                                                                                                                                                                                                                                                |
|----------------|-----------|-----------|------------------------------------------------------------------------------------------------------------------------------------------------------------------------------------------------------------------------------------------------|
| NM_002374.3    | MAP2      | -3.147445 | Homo sapiens microtubule-associated protein 2 (MAP2), transcript variant 1, mRNA.                                                                                                                                                              |
| NM_181332.1    | NLGN4X    | -3.145263 | Homo sapiens neuroligin 4, X-linked (NLGN4X), transcript variant 2, mRNA.                                                                                                                                                                      |
| NM_002006.4    | FGF2      | -3.123623 | Homo sapiens fibroblast growth factor 2 (basic) (FGF2), mRNA.                                                                                                                                                                                  |
| NM_000869.2    | HTR3A     | -3.115791 | Homo sapiens 5-hydroxytryptamine (serotonin) receptor 3A (HTR3A), transcript variant 2, mRNA.                                                                                                                                                  |
| NR_022008.1    | PAR5      | -3.106862 | Homo sapiens Prader-Willi/Angelman syndrome-5 (PAR5), non-coding RNA.                                                                                                                                                                          |
| NM_001851.3    | COL9A1    | -3.105283 | Homo sapiens collagen, type IX, alpha 1 (COL9A1), transcript variant 1, mRNA.                                                                                                                                                                  |
| XM_939432.1    | MGC61598  | -3.085481 | PREDICTED: Homo sapiens similar to ankyrin-repeat protein Nrarp (MGC61598), mRNA.                                                                                                                                                              |
| NM_017753.2    | LPPR1     | -3.080231 | Homo sapiens lipid phosphate phosphatase-related protein type 1 (LPPR1), transcript variant 2, mRNA.                                                                                                                                           |
| NM_173462.3    | PAPLN     | -3.077175 | Homo sapiens papilin, proteoglycan-like sulfated glycoprotein (PAPLN), mRNA.                                                                                                                                                                   |
| NM_001040167.1 | LFNG      | -3.076158 | Homo sapiens LFNG O-fucosylpeptide 3-beta-N-acetylglucosaminyltransferase (LFNG), transcript variant 1, mRNA.                                                                                                                                  |
| NM_004336.2    | BUB1      | -3.066579 | Homo sapiens BUB1 budding uninhibited by benzimidazoles 1 homolog (yeast) (BUB1), mRNA.                                                                                                                                                        |
| NM_174900.3    | ZFP42     | -3.054767 | Homo sapiens zinc finger protein 42 homolog (mouse) (ZFP42), mRNA.                                                                                                                                                                             |
| NM_203400.1    | RPRML     | -3.043571 | Homo sapiens reprimin-like (RPRML), mRNA.                                                                                                                                                                                                      |
| NM_003507.1    | FZD7      | -3.031127 | Homo sapiens frizzled homolog 7 (Drosophila) (FZD7), mRNA.                                                                                                                                                                                     |
| NR_003083.2    | SLC6A10P  | -3.009961 | Homo sapiens solute carrier family 6 (neurotransmitter transporter, creatine), member 10 (pseudogene) (SLC6A10P) on chromosome 16.                                                                                                             |
| NM_133474.2    | ZNF721    | -3.007608 | Homo sapiens zinc finger protein 721 (ZNF721), mRNA.                                                                                                                                                                                           |
| NM_002738.5    | PRKCB1    | -3.00235  | Homo sapiens protein kinase C, beta 1 (PRKCB1), transcript variant 2, mRNA.                                                                                                                                                                    |
| NM_133448.1    | TMEM132D  | -2.991104 | Homo sapiens transmembrane protein 132D (TMEM132D), mRNA.                                                                                                                                                                                      |
| NM_006174.2    | NPY5R     | -2.988126 | Homo sapiens neuropeptide Y receptor Y5 (NPY5R), mRNA.                                                                                                                                                                                         |
| NM_002130.6    | HMGCS1    | -2.982733 | Homo sapiens 3-hydroxy-3-methylglutaryl-Coenzyme A synthase 1 (soluble) (HMGCS1), transcript variant 2, mRNA.                                                                                                                                  |
| XM_929774.2    | LOC646817 | -2.978326 | PREDICTED: Homo sapiens similar to Protein SET (Phosphatase 2A inhibitor I2PP2A) (I-2PP2A) (Template-activating factor I) (TAF-I) (HLA-DR-associated protein II) (PHAPII) (Inhibitor of granzyme A-activated DNase) (IGAAD) (LOC646817), mRNA. |
| NM_003739.4    | AKR1C3    | -2.976459 | Homo sapiens aldo-keto reductase family 1, member C3 (3-alpha hydroxysteroid dehydrogenase, type II) (AKR1C3), mRNA.                                                                                                                           |
| NM_024333.1    | FSD1      | -2.975923 | Homo sapiens fibronectin type III and SPRY domain containing 1 (FSD1), mRNA.                                                                                                                                                                   |
| NM_006286.1    | TFDP2     | -2.971537 | Homo sapiens transcription factor Dp-2 (E2F dimerization partner 2) (TFDP2), mRNA.                                                                                                                                                             |
| XR_000901.1    | FLJ33996  | -2.970323 | PREDICTED: Homo sapiens hypothetical protein FLJ33996 (FLJ33996), misc RNA.                                                                                                                                                                    |
| NM_003360.2    | UGT8      | -2.966884 | Homo sapiens UDP glycosyltransferase 8 (UDP-galactose ceramide galactosyltransferase) (UGT8), mRNA.                                                                                                                                            |
| NM_014750.3    | DLGAP5    | -2.961052 | Homo sapiens discs, large (Drosophila) homolog-associated protein 5 (DLGAP5), mRNA.                                                                                                                                                            |
| NM_019013.1    | FAM64A    | -2.960819 | Homo sapiens family with sequence similarity 64, member A (FAM64A), mRNA.                                                                                                                                                                      |
| NM_015541.2    | LRIG1     | -2.95741  | Homo sapiens leucine-rich repeats and immunoglobulin-like domains 1 (LRIG1), mRNA.                                                                                                                                                             |
| AL136588       |           | -2.94806  | Homo sapiens mRNA; cDNA DKFZp761D112 (from clone DKFZp761D112)                                                                                                                                                                                 |
| NM_018151.3    | RIF1      | -2.937565 | Homo sapiens RAP1 interacting factor homolog (yeast) (RIF1), mRNA.                                                                                                                                                                             |
| NM_004946.1    | DOCK2     | -2.937295 | Homo sapiens dedicator of cytokinesis 2 (DOCK2), mRNA.                                                                                                                                                                                         |

|                |              |           |                                                                                                                                |
|----------------|--------------|-----------|--------------------------------------------------------------------------------------------------------------------------------|
| NM_052943.2    | FAM46B       | -2.928099 | Homo sapiens family with sequence similarity 46, member B (FAM46B), mRNA.                                                      |
| XR_037397.1    | LOC100129267 | -2.919392 | PREDICTED: Homo sapiens misc_RNA (LOC100129267), miscRNA.                                                                      |
| XM_001724965.1 | LOC100129268 | -2.917975 | PREDICTED: Homo sapiens hypothetical protein LOC100129268 (LOC100129268), mRNA.                                                |
| NM_001814.2    | CTSC         | -2.914963 | Homo sapiens cathepsin C (CTSC), transcript variant 1, mRNA.                                                                   |
| NM_172109.1    | KCNQ2        | -2.900905 | Homo sapiens potassium voltage-gated channel, KQT-like subfamily, member 2 (KCNQ2), transcript variant 5, mRNA.                |
| NM_014618.2    | DBC1         | -2.896471 | Homo sapiens deleted in bladder cancer 1 (DBC1), mRNA.                                                                         |
| NM_054023.3    | SCGB3A2      | -2.896249 | Homo sapiens secretoglobin, family 3A, member 2 (SCGB3A2), mRNA.                                                               |
| NM_024785.2    | FAM124B      | -2.881163 | Homo sapiens family with sequence similarity 124B (FAM124B), transcript variant 2, mRNA.                                       |
| NM_005763.2    | AASS         | -2.872855 | Homo sapiens amino adipate-semialdehyde synthase (AASS), nuclear gene encoding mitochondrial protein, mRNA.                    |
| NM_001002844.1 | ZNF280D      | -2.863286 | Homo sapiens zinc finger protein 280D (ZNF280D), transcript variant 3, mRNA.                                                   |
| NM_001042550.1 | SMC2         | -2.855026 | Homo sapiens structural maintenance of chromosomes 2 (SMC2), transcript variant 1, mRNA.                                       |
| NM_033036.2    | GAL3ST3      | -2.851807 | Homo sapiens galactose-3-O-sulfotransferase 3 (GAL3ST3), mRNA.                                                                 |
| NM_017899.2    | TESC         | -2.851763 | Homo sapiens tescalcin (TESC), mRNA.                                                                                           |
| NM_024534.4    | FLJ12684     | -2.842479 | Homo sapiens hypothetical protein FLJ12684 (FLJ12684), mRNA.<br>XR_001254                                                      |
| NM_017669.2    | ERCC6L       | -2.832413 | Homo sapiens excision repair cross-complementing rodent repair deficiency, complementation group 6-like (ERCC6L), mRNA.        |
| XR_038551.1    | LOC389873    | -2.82133  | PREDICTED: Homo sapiens misc_RNA (LOC389873), miscRNA.                                                                         |
| NR_024031.1    | KIAA0114     | -2.820958 | Homo sapiens KIAA0114 (KIAA0114), non-coding RNA.                                                                              |
| NM_001124.1    | ADM          | -2.818169 | Homo sapiens adrenomedullin (ADM), mRNA.                                                                                       |
| XR_079546.1    | MGC11082     | -2.817518 | PREDICTED: Homo sapiens hypothetical LOC84777 (MGC11082), miscRNA.                                                             |
| AK129542       |              | -2.816713 | Homo sapiens cDNA FLJ26031 fis, clone PNC08078                                                                                 |
| NM_000814.4    | GABRB3       | -2.816658 | Homo sapiens gamma-aminobutyric acid (GABA) A receptor, beta 3 (GABRB3), transcript variant 1, mRNA.                           |
| NM_152999.3    | STEAP2       | -2.809754 | Homo sapiens six transmembrane epithelial antigen of the prostate 2 (STEAP2), transcript variant 1, mRNA.                      |
| NM_144584.1    | C1orf59      | -2.806164 | Homo sapiens chromosome 1 open reading frame 59 (C1orf59), mRNA.                                                               |
| NM_006440.3    | TXNRD2       | -2.802364 | Homo sapiens thioredoxin reductase 2 (TXNRD2), nuclear gene encoding mitochondrial protein, mRNA.                              |
| NM_152999.2    | STEAP2       | -2.801054 | Homo sapiens six transmembrane epithelial antigen of the prostate 2 (STEAP2), mRNA.                                            |
| NM_005763.2    | AASS         | -2.798996 | Homo sapiens amino adipate-semialdehyde synthase (AASS), nuclear gene encoding mitochondrial protein, mRNA.                    |
| XM_928013.1    | ACBD7        | -2.797921 | PREDICTED: Homo sapiens acyl-Coenzyme A binding domain containing 7 (ACBD7), mRNA.                                             |
| NM_001018054.1 | LRP8         | -2.79367  | Homo sapiens low density lipoprotein receptor-related protein 8, apolipoprotein e receptor (LRP8), transcript variant 4, mRNA. |
| NM_018063.3    | HELLS        | -2.793664 | Homo sapiens helicase, lymphoid-specific (HELLS), mRNA.                                                                        |
| NM_018169.2    | C12orf35     | -2.792011 | Homo sapiens chromosome 12 open reading frame 35 (C12orf35), mRNA.                                                             |
| NM_012485.1    | HMMR         | -2.787879 | Homo sapiens hyaluronan-mediated motility receptor (RHAMM) (HMMR), transcript variant 2, mRNA.                                 |
| NM_006739.3    | MCM5         | -2.782203 | Homo sapiens minichromosome maintenance complex component 5 (MCM5), mRNA.                                                      |
| XM_001725504.1 | LOC100127971 | -2.780612 | PREDICTED: Homo sapiens hypothetical protein LOC100127971 (LOC100127971), mRNA.                                                |
| NM_001039590.1 | USP9X        | -2.778021 | Homo sapiens ubiquitin specific peptidase 9, X-linked (USP9X), transcript variant 3, mRNA.                                     |
| NM_182830.2    | MDGA2        | -2.777948 | Homo sapiens MAM domain containing glycosylphosphatidylinositol                                                                |

|                |              |           |                                                                                                                             |
|----------------|--------------|-----------|-----------------------------------------------------------------------------------------------------------------------------|
|                |              |           | anchor 2 (MDGA2), mRNA.                                                                                                     |
| NM_144684.1    | ZNF480       | -2.777488 | Homo sapiens zinc finger protein 480 (ZNF480), mRNA.                                                                        |
| NM_024504.2    | PRDM14       | -2.773309 | Homo sapiens PR domain containing 14 (PRDM14), mRNA.                                                                        |
| XM_001134320.1 | FLJ25404     | -2.767252 | PREDICTED: Homo sapiens hypothetical protein FLJ25404, transcript variant 2 (FLJ25404), mRNA.                               |
| NM_001039948.2 | SGSM1        | -2.762705 | Homo sapiens small G protein signaling modulator 1 (SGSM1), transcript variant 1, mRNA.                                     |
| CR738291       |              | -2.759997 | CR738291 Homo sapiens library (Ebert L) Homo sapiens cDNA clone IMAGEp971D2453 ; IMAGE:811744 5, mRNA sequence              |
| NM_004297.2    | GNA14        | -2.756497 | Homo sapiens guanine nucleotide binding protein (G protein), alpha 14 (GNA14), mRNA.                                        |
| NM_004297.2    | GNA14        | -2.756497 | Homo sapiens guanine nucleotide binding protein (G protein), alpha 14 (GNA14), mRNA.                                        |
| NM_001813.2    | CENPE        | -2.756429 | Homo sapiens centromere protein E, 312kDa (CENPE), mRNA.                                                                    |
| NM_005025.3    | SERPINI1     | -2.756039 | Homo sapiens serpin peptidase inhibitor, clade I (neuroserpin), member 1 (SERPINI1), mRNA.                                  |
| NM_001009568.1 | SMPDL3B      | -2.753406 | Homo sapiens sphingomyelin phosphodiesterase, acid-like 3B (SMPDL3B), transcript variant 2, mRNA.                           |
| NM_024090.1    | ELOVL6       | -2.745541 | Homo sapiens ELOVL family member 6, elongation of long chain fatty acids (FEN1/Elo2, SUR4/Elo3-like, yeast) (ELOVL6), mRNA. |
| NM_015568.2    | PPP1R16B     | -2.742289 | Homo sapiens protein phosphatase 1, regulatory (inhibitor) subunit 16B (PPP1R16B), mRNA.                                    |
| NM_006759.3    | UGP2         | -2.731096 | Homo sapiens UDP-glucose pyrophosphorylase 2 (UGP2), transcript variant 1, mRNA.                                            |
| NM_014690.2    | KIAA0773     | -2.728364 | Homo sapiens KIAA0773 gene product (KIAA0773), mRNA.                                                                        |
| NM_198353.1    | KCTD8        | -2.721982 | Homo sapiens potassium channel tetramerisation domain containing 8 (KCTD8), mRNA.                                           |
| NM_032336.1    | GINS4        | -2.721524 | Homo sapiens GINS complex subunit 4 (Sld5 homolog) (GINS4), mRNA.                                                           |
| NM_001011645.1 | AR           | -2.720785 | Homo sapiens androgen receptor (AR), transcript variant 2, mRNA.                                                            |
| NM_014906.3    | PPM1E        | -2.719761 | Homo sapiens protein phosphatase 1E (PP2C domain containing) (PPM1E), mRNA.                                                 |
| NM_019079.2    | L1TD1        | -2.714913 | Homo sapiens LINE-1 type transposase domain containing 1 (L1TD1), mRNA.                                                     |
| NM_005760.2    | CEBPZ        | -2.700685 | Homo sapiens CCAAT/enhancer binding protein (C/EBP), zeta (CEBPZ), mRNA.                                                    |
| XM_001720872.1 | LOC100127971 | -2.697535 | PREDICTED: Homo sapiens hypothetical protein LOC100127971 (LOC100127971), mRNA.                                             |
| NM_001814.2    | CTSC         | -2.697054 | Homo sapiens cathepsin C (CTSC), transcript variant 1, mRNA.                                                                |
| NM_000745.2    | CHRNA5       | -2.691499 | Homo sapiens cholinergic receptor, nicotinic, alpha 5 (CHRNA5), mRNA.                                                       |
| NM_024046.3    | CAMKV        | -2.689437 | Homo sapiens CaM kinase-like vesicle-associated (CAMKV), mRNA.                                                              |
| NM_024504.2    | PRDM14       | -2.687915 | Homo sapiens PR domain containing 14 (PRDM14), mRNA.                                                                        |
| NM_001275.3    | CHGA         | -2.685702 | Homo sapiens chromogranin A (parathyroid secretory protein 1) (CHGA), mRNA.                                                 |
| NM_001441.1    | FAAH         | -2.683675 | Homo sapiens fatty acid amide hydrolase (FAAH), mRNA.                                                                       |
| NM_004664.2    | LIN7A        | -2.680706 | Homo sapiens lin-7 homolog A (C. elegans) (LIN7A), mRNA.                                                                    |
| NM_182970.2    | RIMS4        | -2.68021  | Homo sapiens regulating synaptic membrane exocytosis 4 (RIMS4), mRNA.                                                       |
| XM_001715544.1 | LOC100129673 | -2.677989 | PREDICTED: Homo sapiens similar to hCG2042915 (LOC100129673), mRNA.                                                         |
| XM_928583.1    | LOC645566    | -2.676089 | PREDICTED: Homo sapiens hypothetical protein LOC645566 (LOC645566), mRNA.                                                   |
| NM_018977.2    | NLGN3        | -2.672227 | Homo sapiens neuroligin 3 (NLGN3), mRNA.                                                                                    |
| NM_212535.2    | PRKCB        | -2.672178 | Homo sapiens protein kinase C, beta (PRKCB), transcript variant 1, mRNA.                                                    |
| NM_014750.3    | DLGAP5       | -2.670621 | Homo sapiens discs, large (Drosophila) homolog-associated protein 5 (DLGAP5), mRNA.                                         |
| NM_152359.1    | CPT1C        | -2.668714 | Homo sapiens carnitine palmitoyltransferase 1C (CPT1C), transcript                                                          |

|                |           |           |                                                                                                                                                          |
|----------------|-----------|-----------|----------------------------------------------------------------------------------------------------------------------------------------------------------|
|                |           |           | variant 2, mRNA.                                                                                                                                         |
| NM_057162.1    | KLHL4     | -2.666505 | Homo sapiens kelch-like 4 (Drosophila) (KLHL4), transcript variant 2, mRNA.                                                                              |
| NM_020659.2    | TTYH1     | -2.663693 | Homo sapiens tweety homolog 1 (Drosophila) (TTYH1), transcript variant 1, mRNA.                                                                          |
| NM_030631.2    | SLC25A21  | -2.662698 | Homo sapiens solute carrier family 25 (mitochondrial oxodicarboxylate carrier), member 21 (SLC25A21), nuclear gene encoding mitochondrial protein, mRNA. |
| NM_001033059.1 | AMD1      | -2.660666 | Homo sapiens adenosylmethionine decarboxylase 1 (AMD1), transcript variant 2, mRNA.                                                                      |
| CR603272       |           | -2.658834 | full-length cDNA clone CS0DC013YI10 of Neuroblastoma Cot 25-normalized of Homo sapiens (human)                                                           |
| NM_001042610.1 | DBNDD1    | -2.653589 | Homo sapiens dysbindin (dystrobrevin binding protein 1) domain containing 1 (DBNDD1), transcript variant 1, mRNA.                                        |
| NM_000904.2    | NQO2      | -2.645815 | Homo sapiens NAD(P)H dehydrogenase, quinone 2 (NQO2), mRNA.                                                                                              |
| NM_198336.1    | INSIG1    | -2.642398 | Homo sapiens insulin induced gene 1 (INSIG1), transcript variant 2, mRNA.                                                                                |
| NM_153018.2    | ZFP3      | -2.642004 | Homo sapiens zinc finger protein 3 homolog (mouse) (ZFP3), mRNA.                                                                                         |
| NM_001274.3    | CHEK1     | -2.631944 | Homo sapiens CHK1 checkpoint homolog (S. pombe) (CHEK1), mRNA.                                                                                           |
| NM_017816.1    | LYAR      | -2.630623 | Homo sapiens Ly1 antibody reactive homolog (mouse) (LYAR), mRNA.                                                                                         |
| NM_030755.4    | TMX1      | -2.629364 | Homo sapiens thioredoxin-related transmembrane protein 1 (TMX1), mRNA.                                                                                   |
| NM_003487.2    | TAF15     | -2.627898 | Homo sapiens TAF15 RNA polymerase II, TATA box binding protein (TBP)-associated factor, 68kDa (TAF15), transcript variant 2, mRNA.                       |
| NM_032882.2    | PNMA6A    | -2.622746 | Homo sapiens paraneoplastic antigen like 6A (PNMA6A), mRNA.                                                                                              |
| NM_021808.2    | GALNT9    | -2.619482 | Homo sapiens UDP-N-acetyl-alpha-D-galactosamine:polypeptide N-acetylgalactosaminyltransferase 9 (GalNAc-T9) (GALNT9), mRNA.                              |
| NM_016510.3    | SCLY      | -2.618228 | Homo sapiens selenocysteine lyase (SCLY), mRNA.                                                                                                          |
| NM_001080450.1 | BEND3     | -2.617563 | Homo sapiens BEN domain containing 3 (BEND3), mRNA.                                                                                                      |
| NM_012449.2    | STEAP1    | -2.617346 | Homo sapiens SIX transmembrane epithelial antigen of the prostate 1 (STEAP1), mRNA.                                                                      |
| NM_173078.2    | SLITRK4   | -2.616889 | Homo sapiens SLIT and NTRK-like family, member 4 (SLITRK4), mRNA.                                                                                        |
| NM_015162.3    | ACSBG1    | -2.616684 | Homo sapiens acyl-CoA synthetase bubblegum family member 1 (ACSBG1), mRNA.                                                                               |
| NM_004615.2    | TSPAN7    | -2.616513 | Homo sapiens tetraspanin 7 (TSPAN7), mRNA.                                                                                                               |
| NM_003318.3    | TTK       | -2.615362 | Homo sapiens TTK protein kinase (TTK), mRNA.                                                                                                             |
| NM_006467.2    | POLR3G    | -2.612066 | Homo sapiens polymerase (RNA) III (DNA directed) polypeptide G (32kD) (POLR3G), mRNA.                                                                    |
| NM_198545.2    | C1orf187  | -2.611821 | Homo sapiens chromosome 1 open reading frame 187 (C1orf187), mRNA.                                                                                       |
| BC035081       |           | -2.609576 | Homo sapiens cDNA clone IMAGE:5260685                                                                                                                    |
| NM_005891.2    | ACAT2     | -2.604513 | Homo sapiens acetyl-Coenzyme A acetyltransferase 2 (ACAT2), mRNA.                                                                                        |
| NM_005375.2    | MYB       | -2.601354 | Homo sapiens v-myb myeloblastosis viral oncogene homolog (avian) (MYB), transcript variant 2, mRNA.                                                      |
| NM_006000.1    | TUBA4A    | -2.598541 | Homo sapiens tubulin, alpha 4a (TUBA4A), mRNA.                                                                                                           |
| NM_012484.1    | HMMR      | -2.596416 | Homo sapiens hyaluronan-mediated motility receptor (RHAMM) (HMMR), transcript variant 1, mRNA.                                                           |
| NM_207406.1    | CCDC4     | -2.595317 | Homo sapiens coiled-coil domain containing 4 (CCDC4), mRNA.                                                                                              |
| XM_001134053.1 | LOC199800 | -2.591395 | PREDICTED: Homo sapiens hypothetical protein LOC199800 (LOC199800), mRNA.                                                                                |
| NM_030639.1    | BHLHB9    | -2.590855 | Homo sapiens basic helix-loop-helix domain containing, class B, 9 (BHLHB9), mRNA.                                                                        |
| NM_020742.2    | NLGN4X    | -2.581618 | Homo sapiens neuroligin 4, X-linked (NLGN4X), transcript variant 1, mRNA.                                                                                |
| NM_015560.1    | OPA1      | -2.581115 | Homo sapiens optic atrophy 1 (autosomal dominant) (OPA1), nuclear gene encoding mitochondrial protein, transcript variant 1, mRNA.                       |

|                |              |           |                                                                                                                                            |
|----------------|--------------|-----------|--------------------------------------------------------------------------------------------------------------------------------------------|
| NM_174936.2    | PCSK9        | -2.575492 | Homo sapiens proprotein convertase subtilisin/kexin type 9 (PCSK9), mRNA.                                                                  |
| NM_018063.3    | HELLS        | -2.574972 | Homo sapiens helicase, lymphoid-specific (HELLS), mRNA.                                                                                    |
| NM_152562.2    | CDCA2        | -2.569002 | Homo sapiens cell division cycle associated 2 (CDCA2), mRNA.                                                                               |
| NM_000814.4    | GABRB3       | -2.567669 | Homo sapiens gamma-aminobutyric acid (GABA) A receptor, beta 3 (GABRB3), transcript variant 1, mRNA.                                       |
| NM_198545.3    | C1orf187     | -2.567603 | Homo sapiens chromosome 1 open reading frame 187 (C1orf187), mRNA.                                                                         |
| NM_001018109.1 | PIR          | -2.566798 | Homo sapiens pirin (iron-binding nuclear protein) (PIR), transcript variant 2, mRNA.                                                       |
| NM_181864.2    | ACOT7        | -2.56301  | Homo sapiens acyl-CoA thioesterase 7 (ACOT7), transcript variant hBACHb, mRNA.                                                             |
| NM_153768.1    | CABYR        | -2.56226  | Homo sapiens calcium binding tyrosine-(Y)-phosphorylation regulated (CABYR), transcript variant 2, mRNA.                                   |
| NM_022770.2    | GINS3        | -2.561967 | Homo sapiens GINS complex subunit 3 (Psf3 homolog) (GINS3), mRNA.                                                                          |
| NM_173798.2    | ZCCHC12      | -2.559364 | Homo sapiens zinc finger, CCHC domain containing 12 (ZCCHC12), mRNA.                                                                       |
| XR_015766.1    | LOC730051    | -2.558471 | PREDICTED: Homo sapiens similar to Zinc finger protein 418 (LOC730051), mRNA.                                                              |
| NM_019035.2    | PCDH18       | -2.558286 | Homo sapiens protocadherin 18 (PCDH18), mRNA.                                                                                              |
| NM_138375.1    | CABLES1      | -2.557892 | Homo sapiens Cdk5 and Abl enzyme substrate 1 (CABLES1), transcript variant 1, mRNA.                                                        |
| NM_032512.2    | PDZD4        | -2.557818 | Homo sapiens PDZ domain containing 4 (PDZD4), mRNA.                                                                                        |
| NM_016567.2    | BCCIP        | -2.557776 | Homo sapiens BRCA2 and CDKN1A interacting protein (BCCIP), transcript variant A, mRNA.                                                     |
| NM_003112.3    | SP4          | -2.557231 | Homo sapiens Sp4 transcription factor (SP4), mRNA.                                                                                         |
| XR_041527.1    | ZNF788       | -2.553638 | PREDICTED: Homo sapiens misc_RNA (ZNF788), miscRNA.                                                                                        |
| NM_144978.1    | CCDC138      | -2.553385 | Homo sapiens coiled-coil domain containing 138 (CCDC138), mRNA.                                                                            |
| NM_004624.2    | VIPR1        | -2.551401 | Homo sapiens vasoactive intestinal peptide receptor 1 (VIPR1), mRNA.                                                                       |
| NM_018361.2    | AGPAT5       | -2.549224 | Homo sapiens 1-acylglycerol-3-phosphate O-acyltransferase 5 (lysophosphatidic acid acyltransferase, epsilon) (AGPAT5), mRNA.               |
| NM_005513.1    | GTF2E1       | -2.549152 | Homo sapiens general transcription factor IIE, polypeptide 1 (alpha subunit, 56kD) (GTF2E1), mRNA.                                         |
| NM_001038.4    | SCNN1A       | -2.547818 | Homo sapiens sodium channel, nonvoltage-gated 1 alpha (SCNN1A), mRNA.                                                                      |
| NM_001097635.1 | GCNT1        | -2.547293 | Homo sapiens glucosaminyl (N-acetyl) transferase 1, core 2 (beta-1,6-N-acetylglucosaminyltransferase) (GCNT1), transcript variant 4, mRNA. |
| XR_037892.1    | LOC100130550 | -2.544705 | PREDICTED: Homo sapiens misc_RNA (LOC100130550), miscRNA.                                                                                  |
| NM_001002919.2 | FAM150B      | -2.537784 | Homo sapiens family with sequence similarity 150, member B (FAM150B), mRNA.                                                                |
| NM_017745.4    | BCOR         | -2.537144 | Homo sapiens BCL6 co-repressor (BCOR), transcript variant 1, mRNA.                                                                         |
| NM_033222.2    | PSIP1        | -2.535331 | Homo sapiens PC4 and SFRS1 interacting protein 1 (PSIP1), transcript variant 2, mRNA.                                                      |
| NM_003980.3    | MAP7         | -2.532212 | Homo sapiens microtubule-associated protein 7 (MAP7), mRNA.                                                                                |
| NM_018644.3    | B3GAT1       | -2.52683  | Homo sapiens beta-1,3-glucuronyltransferase 1 (glucuronosyltransferase P) (B3GAT1), transcript variant 1, mRNA.                            |
| NM_021968.3    | HIST1H4J     | -2.521186 | Homo sapiens histone cluster 1, H4j (HIST1H4J), mRNA.                                                                                      |
| NM_020300.3    | MGST1        | -2.520732 | Homo sapiens microsomal glutathione S-transferase 1 (MGST1), transcript variant 1b, mRNA.                                                  |
| NM_001316.2    | CSE1L        | -2.519681 | Homo sapiens CSE1 chromosome segregation 1-like (yeast) (CSE1L), mRNA.                                                                     |
| NM_001001995.1 | GPM6B        | -2.519282 | Homo sapiens glycoprotein M6B (GPM6B), transcript variant 1, mRNA.                                                                         |
| NM_018151.3    | RIF1         | -2.515646 | Homo sapiens RAP1 interacting factor homolog (yeast) (RIF1), mRNA.                                                                         |
| NM_020926.2    | BCOR         | -2.514079 | Homo sapiens BCL6 co-repressor (BCOR), transcript variant 2, mRNA.                                                                         |
| NM_182728.1    | SLC7A8       | -2.513152 | Homo sapiens solute carrier family 7 (cationic amino acid transporter, y+ system), member 8 (SLC7A8), transcript variant 2, mRNA.          |
| NM_024094.1    | DSCC1        | -2.508388 | Homo sapiens defective in sister chromatid cohesion 1 homolog (S.                                                                          |

|                |           |           |                                                                                                                                                      |
|----------------|-----------|-----------|------------------------------------------------------------------------------------------------------------------------------------------------------|
|                |           |           | cerevisiae) (DSCC1), mRNA.                                                                                                                           |
| NM_001039876.1 | C19orf46  | -2.508177 | Homo sapiens chromosome 19 open reading frame 46 (C19orf46), mRNA.                                                                                   |
| NM_005382.1    | NEFM      | -2.50674  | Homo sapiens neurofilament, medium polypeptide 150kDa (NEFM), mRNA.                                                                                  |
| NM_030666.2    | SERPINB1  | -2.506226 | Homo sapiens serpin peptidase inhibitor, clade B (ovalbumin), member 1 (SERPINB1), mRNA.                                                             |
| NM_020675.3    | SPC25     | -2.503434 | Homo sapiens SPC25, NDC80 kinetochore complex component, homolog ( <i>S. cerevisiae</i> ) (SPC25), mRNA.                                             |
| NM_080872.1    | UNC5D     | -2.502088 | Homo sapiens unc-5 homolog D ( <i>C. elegans</i> ) (UNC5D), mRNA.                                                                                    |
| CR603183       |           | -2.501954 | full-length cDNA clone CSODM012YE14 of Fetal liver of Homo sapiens (human)                                                                           |
| NM_000057.2    | BLM       | -2.500414 | Homo sapiens Bloom syndrome, RecQ helicase-like (BLM), mRNA.                                                                                         |
| NM_002461.1    | MVD       | -2.497685 | Homo sapiens mevalonate (diphospho) decarboxylase (MVD), mRNA.                                                                                       |
| NM_178562.2    | TSPAN33   | -2.495402 | Homo sapiens tetraspanin 33 (TSPAN33), mRNA.                                                                                                         |
| AK123319       |           | -2.494066 | Homo sapiens cDNA FLJ41325 fis, clone BRAMY2046871                                                                                                   |
| NM_005915.4    | MCM6      | -2.493921 | Homo sapiens minichromosome maintenance complex component 6 (MCM6), mRNA.                                                                            |
| NM_014996.1    | PLCH1     | -2.490897 | Homo sapiens phospholipase C, eta 1 (PLCH1), mRNA.                                                                                                   |
| NM_017816.1    | LYAR      | -2.488899 | Homo sapiens Ly1 antibody reactive homolog (mouse) (LYAR), mRNA.                                                                                     |
| NM_033201.1    | C16orf45  | -2.488588 | Homo sapiens chromosome 16 open reading frame 45 (C16orf45), mRNA.                                                                                   |
| NM_138374.1    | ZNF845    | -2.485464 | Homo sapiens zinc finger protein 845 (ZNF845), mRNA. XM_039908                                                                                       |
| NR_002940.1    | LRRC37A4  | -2.485131 | Homo sapiens leucine rich repeat containing 37, member A4 (pseudogene) (LRRC37A4), non-coding RNA. XM_934274 XM_941652 XM_945358 XM_945361 XM_945364 |
| NM_001100.3    | ACTA1     | -2.483246 | Homo sapiens actin, alpha 1, skeletal muscle (ACTA1), mRNA.                                                                                          |
| NM_014736.4    | KIAA0101  | -2.480605 | Homo sapiens KIAA0101 (KIAA0101), transcript variant 1, mRNA.                                                                                        |
| NM_017915.2    | C12orf48  | -2.479953 | Homo sapiens chromosome 12 open reading frame 48 (C12orf48), mRNA.                                                                                   |
| NM_001002919.1 | LOC285016 | -2.479288 | Homo sapiens hypothetical protein LOC285016 (LOC285016), mRNA.                                                                                       |
| NM_001197.3    | BIK       | -2.478377 | Homo sapiens BCL2-interacting killer (apoptosis-inducing) (BIK), mRNA.                                                                               |
| NM_004523.2    | KIF11     | -2.478367 | Homo sapiens kinesin family member 11 (KIF11), mRNA.                                                                                                 |
| NM_017711.2    | GDPD2     | -2.478335 | Homo sapiens glycerophosphodiester phosphodiesterase domain containing 2 (GDPD2), mRNA.                                                              |
| NR_024281.1    | LOC157627 | -2.478044 | Homo sapiens hypothetical LOC157627 (LOC157627), non-coding RNA.                                                                                     |
| NM_019030.2    | DHX29     | -2.477001 | Homo sapiens DEAH (Asp-Glu-Ala-His) box polypeptide 29 (DHX29), mRNA.                                                                                |
| NM_014790.3    | JAKMIP2   | -2.473336 | Homo sapiens janus kinase and microtubule interacting protein 2 (JAKMIP2), mRNA.                                                                     |
| NM_015541.2    | LRIG1     | -2.470183 | Homo sapiens leucine-rich repeats and immunoglobulin-like domains 1 (LRIG1), mRNA.                                                                   |
| NM_033625.2    | RPL34     | -2.467607 | Homo sapiens ribosomal protein L34 (RPL34), transcript variant 2, mRNA.                                                                              |
| NM_024565.5    | CCNJL     | -2.466302 | Homo sapiens cyclin J-like (CCNJL), mRNA.                                                                                                            |
| NM_014762.3    | DHCR24    | -2.458714 | Homo sapiens 24-dehydrocholesterol reductase (DHCR24), mRNA.                                                                                         |
| NM_182746.1    | MCM4      | -2.454214 | Homo sapiens minichromosome maintenance complex component 4 (MCM4), transcript variant 2, mRNA.                                                      |
| NM_005445.3    | SMC3      | -2.453964 | Homo sapiens structural maintenance of chromosomes 3 (SMC3), mRNA.                                                                                   |
| NM_018360.1    | CXorf15   | -2.452717 | Homo sapiens chromosome X open reading frame 15 (CXorf15), mRNA.                                                                                     |
| NM_018369.1    | DEPDC1B   | -2.45203  | Homo sapiens DEP domain containing 1B (DEPDC1B), mRNA.                                                                                               |
| NM_152312.3    | GYLTL1B   | -2.450864 | Homo sapiens glycosyltransferase-like 1B (GYLTL1B), mRNA.                                                                                            |
| NM_014264.3    | PLK4      | -2.450081 | Homo sapiens polo-like kinase 4 ( <i>Drosophila</i> ) (PLK4), mRNA.                                                                                  |
| NM_021963.2    | NAP1L2    | -2.449983 | Homo sapiens nucleosome assembly protein 1-like 2 (NAP1L2), mRNA.                                                                                    |
| NM_174976.2    | ZDHHC22   | -2.448561 | Homo sapiens zinc finger, DHHC-type containing 22 (ZDHHC22), mRNA.                                                                                   |
| NM_016195.2    | KIF20B    | -2.447154 | Homo sapiens kinesin family member 20B (KIF20B), mRNA.                                                                                               |

|                |           |           |                                                                                                                             |
|----------------|-----------|-----------|-----------------------------------------------------------------------------------------------------------------------------|
| NM_012247.3    | SEPHS1    | -2.447047 | Homo sapiens selenophosphate synthetase 1 (SEPHS1), mRNA.                                                                   |
| NM_006286.1    | TFDP2     | -2.446586 | Homo sapiens transcription factor Dp-2 (E2F dimerization partner 2) (TFDP2), mRNA.                                          |
| NM_004490.2    | GRB14     | -2.443434 | Homo sapiens growth factor receptor-bound protein 14 (GRB14), mRNA.                                                         |
| NM_182679.1    | GPATCH4   | -2.442508 | Homo sapiens G patch domain containing 4 (GPATCH4), transcript variant 2, mRNA.                                             |
| NM_001013437.1 | SEH1L     | -2.441029 | Homo sapiens SEH1-like ( <i>S. cerevisiae</i> ) (SEH1L), transcript variant 1, mRNA.                                        |
| NM_015678.3    | NBEA      | -2.437975 | Homo sapiens neurobeachin (NBEA), mRNA.                                                                                     |
| NM_001316.2    | CSE1L     | -2.436721 | Homo sapiens CSE1 chromosome segregation 1-like (yeast) (CSE1L), mRNA.                                                      |
| NM_024595.1    | AKIRIN1   | -2.436027 | Homo sapiens akirin 1 (AKIRIN1), mRNA.                                                                                      |
| XR_016129.1    | LOC653108 | -2.435504 | PREDICTED: Homo sapiens similar to coxsackie virus and adenovirus receptor precursor (LOC653108), mRNA.                     |
| NM_030928.2    | CDT1      | -2.433737 | Homo sapiens chromatin licensing and DNA replication factor 1 (CDT1), mRNA.                                                 |
| NM_015028.1    | TNIK      | -2.432942 | Homo sapiens TRAF2 and NCK interacting kinase (TNIK), mRNA.                                                                 |
| NM_018365.1    | MNS1      | -2.432063 | Homo sapiens meiosis-specific nuclear structural 1 (MNS1), mRNA.                                                            |
| NM_152524.3    | SGOL2     | -2.417783 | Homo sapiens shugoshin-like 2 ( <i>S. pombe</i> ) (SGOL2), mRNA.                                                            |
| NM_024945.2    | RMI1      | -2.415608 | Homo sapiens RMI1, RecQ mediated genome instability 1, homolog ( <i>S. cerevisiae</i> ) (RMI1), mRNA.                       |
| NM_018087.3    | TMEM48    | -2.415343 | Homo sapiens transmembrane protein 48 (TMEM48), mRNA.                                                                       |
| NM_017934.4    | PHIP      | -2.413013 | Homo sapiens pleckstrin homology domain interacting protein (PHIP), mRNA.                                                   |
| NM_017954.9    | CADPS2    | -2.412455 | Homo sapiens Ca <sup>++</sup> -dependent secretion activator 2 (CADPS2), transcript variant 1, mRNA.                        |
| NM_024860.1    | SETD6     | -2.411448 | Homo sapiens SET domain containing 6 (SETD6), mRNA.                                                                         |
| NM_033267.3    | IRX2      | -2.410852 | Homo sapiens iroquois homeobox 2 (IRX2), mRNA.                                                                              |
| NM_005440.3    | RND2      | -2.406724 | Homo sapiens Rho family GTPase 2 (RND2), mRNA.                                                                              |
| NM_020927.1    | VAT1L     | -2.405415 | Homo sapiens vesicle amine transport protein 1 homolog ( <i>T. californica</i> )-like (VAT1L), mRNA.                        |
| NM_017906.2    | PAK1IP1   | -2.404698 | Homo sapiens PAK1 interacting protein 1 (PAK1IP1), mRNA.                                                                    |
| NM_198175.1    | NME1      | -2.403625 | Homo sapiens non-metastatic cells 1, protein (NM23A) expressed in (NME1), transcript variant 1, mRNA.                       |
| NM_020819.2    | FAM135A   | -2.402734 | Homo sapiens family with sequence similarity 135, member A (FAM135A), mRNA.                                                 |
| NM_004432.2    | ELAVL2    | -2.402218 | Homo sapiens ELAV (embryonic lethal, abnormal vision, <i>Drosophila</i> )-like 2 (Hu antigen B) (ELAVL2), mRNA.             |
| NM_001813.2    | CENPE     | -2.400644 | Homo sapiens centromere protein E, 312kDa (CENPE), mRNA.                                                                    |
| NM_152649.1    | MLKL      | -2.400346 | Homo sapiens mixed lineage kinase domain-like (MLKL), mRNA.                                                                 |
| NM_024749.2    | VASH2     | -2.398513 | Homo sapiens vasohibin 2 (VASH2), mRNA.                                                                                     |
| NM_152672.4    | OSTalpha  | -2.397985 | Homo sapiens organic solute transporter alpha (OSTalpha), mRNA.                                                             |
| NM_207406.2    | BEND4     | -2.39769  | Homo sapiens BEN domain containing 4 (BEND4), mRNA.                                                                         |
| NM_032776.1    | JMJD1C    | -2.396438 | Homo sapiens jumonji domain containing 1C (JMJD1C), transcript variant 1, mRNA.                                             |
| NM_017975.3    | ZWILCH    | -2.394908 | Homo sapiens Zwilch, kinetochore associated, homolog ( <i>Drosophila</i> ) (ZWILCH), transcript variant 1, mRNA.            |
| NM_014109.2    | ATAD2     | -2.394525 | Homo sapiens ATPase family, AAA domain containing 2 (ATAD2), mRNA.                                                          |
| NM_024090.1    | ELOVL6    | -2.391472 | Homo sapiens ELOVL family member 6, elongation of long chain fatty acids (FEN1/Elo2, SUR4/Elo3-like, yeast) (ELOVL6), mRNA. |
| NM_001448.2    | GPC4      | -2.389164 | Homo sapiens glypican 4 (GPC4), mRNA.                                                                                       |
| XM_373461.3    | LOC387683 | -2.388867 | PREDICTED: Homo sapiens hypothetical LOC387683 (LOC387683), mRNA.                                                           |
| NM_005193.1    | CDX4      | -2.388466 | Homo sapiens caudal type homeobox 4 (CDX4), mRNA.                                                                           |
| NM_145061.3    | C13orf3   | -2.388271 | Homo sapiens chromosome 13 open reading frame 3 (C13orf3), mRNA.                                                            |
| NM_005656.2    | TMPRSS2   | -2.387695 | Homo sapiens transmembrane protease, serine 2 (TMPRSS2), mRNA.                                                              |

|                |              |           |                                                                                                                             |
|----------------|--------------|-----------|-----------------------------------------------------------------------------------------------------------------------------|
| NM_016391.4    | NOP16        | -2.386996 | Homo sapiens NOP16 nucleolar protein homolog (yeast) (NOP16), mRNA.                                                         |
| XM_946212.2    | FLJ44379     | -2.385273 | PREDICTED: Homo sapiens similar to S-100 protein, alpha chain, transcript variant 3 (FLJ44379), mRNA.                       |
| NM_021128.3    | POLR2L       | -2.385158 | Homo sapiens polymerase (RNA) II (DNA directed) polypeptide L, 7.6kDa (POLR2L), mRNA.                                       |
| NM_013230.2    | CD24         | -2.384854 | Homo sapiens CD24 molecule (CD24), mRNA.                                                                                    |
| NM_021992.2    | TMSB15A      | -2.384516 | Homo sapiens thymosin beta 15a (TMSB15A), mRNA.                                                                             |
| NM_030622.6    | CYP2S1       | -2.38216  | Homo sapiens cytochrome P450, family 2, subfamily S, polypeptide 1 (CYP2S1), mRNA.                                          |
| NM_018644.3    | B3GAT1       | -2.381834 | Homo sapiens beta-1,3-glucuronyltransferase 1 (glucuronosyltransferase P) (B3GAT1), transcript variant 1, mRNA.             |
| NM_001338.3    | CXADR        | -2.378511 | Homo sapiens coxsackie virus and adenovirus receptor (CXADR), mRNA.                                                         |
| NM_006759.3    | UGP2         | -2.378334 | Homo sapiens UDP-glucose pyrophosphorylase 2 (UGP2), transcript variant 1, mRNA.                                            |
| NM_005483.2    | CHAF1A       | -2.375863 | Homo sapiens chromatin assembly factor 1, subunit A (p150) (CHAF1A), mRNA.                                                  |
| NM_014317.3    | PDSS1        | -2.37556  | Homo sapiens prenyl (decaprenyl) diphosphate synthase, subunit 1 (PDSS1), mRNA.                                             |
| NM_181676.1    | PPP2R2B      | -2.375048 | Homo sapiens protein phosphatase 2 (formerly 2A), regulatory subunit B, beta isoform (PPP2R2B), transcript variant 4, mRNA. |
| NM_000530.3    | MPZ          | -2.374266 | Homo sapiens myelin protein zero (Charcot-Marie-Tooth neuropathy 1B) (MPZ), mRNA.                                           |
| NM_203394.2    | E2F7         | -2.371138 | Homo sapiens E2F transcription factor 7 (E2F7), mRNA.                                                                       |
| NM_012250.3    | RRAS2        | -2.369973 | Homo sapiens related RAS viral (r-ras) oncogene homolog 2 (RRAS2), mRNA.                                                    |
| NM_001025249.1 | DUT          | -2.369185 | Homo sapiens deoxyuridine triphosphatase (DUT), nuclear gene encoding mitochondrial protein, transcript variant 3, mRNA.    |
| NM_145014.1    | HYLS1        | -2.368543 | Homo sapiens hydrolethalus syndrome 1 (HYLS1), mRNA.                                                                        |
| XM_001715311.1 | LOC100128485 | -2.367755 | PREDICTED: Homo sapiens similar to conserved hypothetical protein (LOC100128485), mRNA.                                     |
| NR_002789.1    | LOC168474    | -2.365809 | Homo sapiens selenophosphate synthetase pseudogene (LOC168474), non-coding RNA.                                             |
| XR_037327.1    | LOC100128007 | -2.36182  | PREDICTED: Homo sapiens misc_RNA (LOC100128007), miscRNA.                                                                   |
| NM_020890.1    | KIAA1524     | -2.361463 | Homo sapiens KIAA1524 (KIAA1524), mRNA.                                                                                     |
| AK123661       |              | -2.361028 | Homo sapiens cDNA FLJ41667 fis, clone FEBRA2028366                                                                          |
| NM_033213.2    | ZNF670       | -2.36087  | Homo sapiens zinc finger protein 670 (ZNF670), mRNA.                                                                        |
| NM_052899.2    | GPRIN1       | -2.360495 | Homo sapiens G protein regulated inducer of neurite outgrowth 1 (GPRIN1), mRNA.                                             |
| NM_006101.1    | NDC80        | -2.359413 | Homo sapiens NDC80 homolog, kinetochore complex component (S. cerevisiae) (NDC80), mRNA.                                    |
| NM_006159.1    | NELL2        | -2.353069 | Homo sapiens NEL-like 2 (chicken) (NELL2), mRNA.                                                                            |
| NM_152280.2    | SYT11        | -2.352348 | Homo sapiens synaptotagmin XI (SYT11), mRNA.                                                                                |
| NM_016391.3    | HSPC111      | -2.352144 | Homo sapiens hypothetical protein HSPC111 (HSPC111), mRNA.                                                                  |
| NM_016518.2    | PIPOX        | -2.351986 | Homo sapiens pipecolic acid oxidase (PIPOX), mRNA.                                                                          |
| NM_021190.1    | PTBP2        | -2.350104 | Homo sapiens polypyrimidine tract binding protein 2 (PTBP2), mRNA.                                                          |
| NM_005445.3    | SMC3         | -2.349912 | Homo sapiens structural maintenance of chromosomes 3 (SMC3), mRNA.                                                          |
| NM_001024662.1 | RPL6         | -2.349645 | Homo sapiens ribosomal protein L6 (RPL6), transcript variant 1, mRNA.                                                       |
| NM_006690.3    | MMP24        | -2.347497 | Homo sapiens matrix metalloproteinase 24 (membrane-inserted) (MMP24), mRNA.                                                 |
| NM_014363.3    | SACS         | -2.347022 | Homo sapiens spastic ataxia of Charlevoix-Saguenay (sacsin) (SACS), mRNA.                                                   |
| NM_000814.4    | GABRB3       | -2.343051 | Homo sapiens gamma-aminobutyric acid (GABA) A receptor, beta 3 (GABRB3), transcript variant 1, mRNA.                        |
| NM_014739.2    | BCLAF1       | -2.342602 | Homo sapiens BCL2-associated transcription factor 1 (BCLAF1), transcript variant 1, mRNA.                                   |



|                |              |           |                                                                                                                                                                  |
|----------------|--------------|-----------|------------------------------------------------------------------------------------------------------------------------------------------------------------------|
| NM_002735.1    | PRKAR1B      | -2.342474 | Homo sapiens protein kinase, cAMP-dependent, regulatory, type I, beta (PRKAR1B), mRNA.                                                                           |
| NM_015462.3    | NOL11        | -2.34159  | Homo sapiens nucleolar protein 11 (NOL11), mRNA.                                                                                                                 |
| NM_020819.2    | FAM135A      | -2.337071 | Homo sapiens family with sequence similarity 135, member A (FAM135A), mRNA.                                                                                      |
| NM_000322.3    | PRPH2        | -2.336572 | Homo sapiens peripherin 2 (retinal degeneration, slow) (PRPH2), mRNA.                                                                                            |
| NM_004181.3    | UCHL1        | -2.334514 | Homo sapiens ubiquitin carboxyl-terminal esterase L1 (ubiquitin thiolesterase) (UCHL1), mRNA.                                                                    |
| XM_209104.2    | LOC284293    | -2.333931 | PREDICTED: Homo sapiens similar to Placental thrombin inhibitor (Cytoplasmic antiproteinase) (CAP) (Protease inhibitor 6) (PI-6) (Serpin B6) (LOC284293), mRNA.  |
| XM_001134002.1 | C17orf41     | -2.332753 | PREDICTED: Homo sapiens chromosome 17 open reading frame 41 (C17orf41), mRNA.                                                                                    |
| NM_000478.3    | ALPL         | -2.331149 | Homo sapiens alkaline phosphatase, liver/bone/kidney (ALPL), transcript variant 1, mRNA.                                                                         |
| NM_018518.3    | MCM10        | -2.33057  | Homo sapiens minichromosome maintenance complex component 10 (MCM10), transcript variant 2, mRNA.                                                                |
| NM_000170.2    | GLDC         | -2.330469 | Homo sapiens glycine dehydrogenase (decarboxylating) (GLDC), mRNA.                                                                                               |
| NM_020242.1    | KIF15        | -2.328548 | Homo sapiens kinesin family member 15 (KIF15), mRNA.                                                                                                             |
| NM_182553.1    | CNIH2        | -2.326781 | Homo sapiens cornichon homolog 2 (Drosophila) (CNIH2), mRNA.                                                                                                     |
| NM_020692.1    | GALNTL1      | -2.325452 | Homo sapiens UDP-N-acetyl-alpha-D-galactosamine:polypeptide N-acetylgalactosaminyltransferase-like 1 (GALNTL1), mRNA.                                            |
| NM_001039111.1 | TRIM71       | -2.324831 | Homo sapiens tripartite motif-containing 71 (TRIM71), mRNA.                                                                                                      |
| NM_014875.1    | KIF14        | -2.32423  | Homo sapiens kinesin family member 14 (KIF14), mRNA.                                                                                                             |
| NM_003026.1    | SH3GL2       | -2.323926 | Homo sapiens SH3-domain GRB2-like 2 (SH3GL2), mRNA.                                                                                                              |
| NM_180991.4    | SLCO4C1      | -2.323851 | Homo sapiens solute carrier organic anion transporter family, member 4C1 (SLCO4C1), mRNA.                                                                        |
| NM_004728.2    | DDX21        | -2.323712 | Homo sapiens DEAD (Asp-Glu-Ala-Asp) box polypeptide 21 (DDX21), mRNA.                                                                                            |
| NM_004448.2    | ERBB2        | -2.32327  | Homo sapiens v-erb-b2 erythroblastic leukemia viral oncogene homolog 2, neuro/glioblastoma derived oncogene homolog (avian) (ERBB2), transcript variant 1, mRNA. |
| NM_080599.1    | UPF2         | -2.320852 | Homo sapiens UPF2 regulator of nonsense transcripts homolog (yeast) (UPF2), transcript variant 1, mRNA.                                                          |
| XM_001723077.1 | LOC100132934 | -2.320723 | PREDICTED: Homo sapiens similar to hCG1644233 (LOC100132934), mRNA.                                                                                              |
| NM_021615.4    | CHST6        | -2.320083 | Homo sapiens carbohydrate (N-acetylglucosamine 6-O) sulfotransferase 6 (CHST6), mRNA.                                                                            |
| NM_001449.3    | FHL1         | -2.318175 | Homo sapiens four and a half LIM domains 1 (FHL1), mRNA.                                                                                                         |
| NM_014932.2    | NLGN1        | -2.315733 | Homo sapiens neuroligin 1 (NLGN1), mRNA.                                                                                                                         |
| NM_001039591.2 | USP9X        | -2.313567 | Homo sapiens ubiquitin specific peptidase 9, X-linked (USP9X), transcript variant 4, mRNA.                                                                       |
| NM_007274.3    | ACOT7        | -2.312653 | Homo sapiens acyl-CoA thioesterase 7 (ACOT7), transcript variant hBACHa, mRNA.                                                                                   |
| NM_024755.2    | SLTM         | -2.310426 | Homo sapiens SAFB-like, transcription modulator (SLTM), transcript variant 1, mRNA.                                                                              |
| NM_015414.2    | RPL36        | -2.310257 | Homo sapiens ribosomal protein L36 (RPL36), transcript variant 2, mRNA.                                                                                          |
| NM_024674.4    | LIN28        | -2.309441 | Homo sapiens lin-28 homolog (C. elegans) (LIN28), mRNA.                                                                                                          |
| NM_003716.2    | CADPS        | -2.309055 | Homo sapiens Ca <sup>2+</sup> -dependent secretion activator (CADPS), transcript variant 1, mRNA.                                                                |
| NM_005639.1    | SYT1         | -2.308776 | Homo sapiens synaptotagmin I (SYT1), mRNA.                                                                                                                       |
| NM_024645.2    | ZMAT4        | -2.306506 | Homo sapiens zinc finger, matrin type 4 (ZMAT4), transcript variant 1, mRNA.                                                                                     |
| NM_016014.2    | FAM108B1     | -2.305399 | Homo sapiens family with sequence similarity 108, member B1 (FAM108B1), transcript variant 1, mRNA.                                                              |
| NM_007280.1    | OIP5         | -2.304904 | Homo sapiens Opa interacting protein 5 (OIP5), mRNA.                                                                                                             |

|                |              |           |                                                                                                                                 |
|----------------|--------------|-----------|---------------------------------------------------------------------------------------------------------------------------------|
| U56251         |              | -2.304339 | Human HeLa mRNA isolated as a false positive in a two-hybrid-screen                                                             |
| NM_001002019.1 | PUS1         | -2.300626 | Homo sapiens pseudouridylate synthase 1 (PUS1), transcript variant 2, mRNA.                                                     |
| NM_024333.1    | FSD1         | -2.297574 | Homo sapiens fibronectin type III and SPRY domain containing 1 (FSD1), mRNA.                                                    |
| NM_003121.2    | SPIB         | -2.296659 | Homo sapiens Spi-B transcription factor (Spi-1/PU.1 related) (SPIB), mRNA.                                                      |
| NM_145176.2    | SLC2A12      | -2.29604  | Homo sapiens solute carrier family 2 (facilitated glucose transporter), member 12 (SLC2A12), mRNA.                              |
| NM_001360.2    | DHCR7        | -2.295874 | Homo sapiens 7-dehydrocholesterol reductase (DHCR7), transcript variant 1, mRNA.                                                |
| XM_931068.1    | C13orf25     | -2.293515 | PREDICTED: Homo sapiens chromosome 13 open reading frame 25 (C13orf25), mRNA.                                                   |
| NM_004523.2    | KIF11        | -2.29307  | Homo sapiens kinesin family member 11 (KIF11), mRNA.                                                                            |
| NM_006372.3    | SYNCRIP      | -2.292412 | Homo sapiens synaptotagmin binding, cytoplasmic RNA interacting protein (SYNCRIP), mRNA.                                        |
| NM_005378.4    | MYCN         | -2.291062 | Homo sapiens v-myc myelocytomatosis viral related oncogene, neuroblastoma derived (avian) (MYCN), mRNA.                         |
| NM_004615.2    | TSPAN7       | -2.290982 | Homo sapiens tetraspanin 7 (TSPAN7), mRNA.                                                                                      |
| NM_021190.1    | PTBP2        | -2.290735 | Homo sapiens polypyrimidine tract binding protein 2 (PTBP2), mRNA.                                                              |
| NM_001360.1    | DHCR7        | -2.2903   | Homo sapiens 7-dehydrocholesterol reductase (DHCR7), mRNA.                                                                      |
| NM_000995.2    | RPL34        | -2.28994  | Homo sapiens ribosomal protein L34 (RPL34), transcript variant 1, mRNA.                                                         |
| NM_005689.1    | ABCB6        | -2.289676 | Homo sapiens ATP-binding cassette, sub-family B (MDR/TAP), member 6 (ABCB6), nuclear gene encoding mitochondrial protein, mRNA. |
| XR_039217.1    | LOC100130769 | -2.289634 | PREDICTED: Homo sapiens misc_RNA (LOC100130769), miscRNA.                                                                       |
| NM_005025.2    | SERPINI1     | -2.288278 | Homo sapiens serpin peptidase inhibitor, clade I (neuroserpin), member 1 (SERPINI1), mRNA.                                      |
| NM_001789.2    | CDC25A       | -2.287323 | Homo sapiens cell division cycle 25 homolog A (S. pombe) (CDC25A), transcript variant 1, mRNA.                                  |
| NM_020836.2    | BEGAIN       | -2.286561 | Homo sapiens brain-enriched guanylate kinase-associated homolog (rat) (BEGAIN), mRNA.                                           |
| NM_018476.3    | BEX1         | -2.284646 | Homo sapiens brain expressed, X-linked 1 (BEX1), mRNA.                                                                          |
| NM_021723.2    | ADAM22       | -2.284512 | Homo sapiens ADAM metallopeptidase domain 22 (ADAM22), transcript variant 1, mRNA.                                              |
| NM_005391.2    | PKD3         | -2.284511 | Homo sapiens pyruvate dehydrogenase kinase, isozyme 3 (PKD3), mRNA.                                                             |
| NM_001001995.1 | GPM6B        | -2.284144 | Homo sapiens glycoprotein M6B (GPM6B), transcript variant 1, mRNA.                                                              |
| NM_001008708.1 | CHAC2        | -2.282615 | Homo sapiens ChaC, cation transport regulator homolog 2 (E. coli) (CHAC2), mRNA.                                                |
| NM_003822.3    | NR5A2        | -2.282109 | Homo sapiens nuclear receptor subfamily 5, group A, member 2 (NR5A2), transcript variant 2, mRNA.                               |
| NM_000251.1    | MSH2         | -2.281796 | Homo sapiens mutS homolog 2, colon cancer, nonpolyposis type 1 (E. coli) (MSH2), mRNA.                                          |
| AK000776       |              | -2.278745 | Homo sapiens cDNA FLJ20769 fis, clone COL06674                                                                                  |
| NM_001007157.1 | PHF14        | -2.278036 | Homo sapiens PHD finger protein 14 (PHF14), transcript variant 1, mRNA.                                                         |
| NM_004526.2    | MCM2         | -2.276597 | Homo sapiens minichromosome maintenance complex component 2 (MCM2), mRNA.                                                       |
| NM_030622.6    | CYP2S1       | -2.276331 | Homo sapiens cytochrome P450, family 2, subfamily S, polypeptide 1 (CYP2S1), mRNA.                                              |
| NM_052896.3    | CSMD2        | -2.274462 | Homo sapiens CUB and Sushi multiple domains 2 (CSMD2), mRNA.                                                                    |
| NM_015596.1    | KLK13        | -2.27434  | Homo sapiens kallikrein-related peptidase 13 (KLK13), mRNA.                                                                     |
| NM_032415.2    | CARD11       | -2.270161 | Homo sapiens caspase recruitment domain family, member 11 (CARD11), mRNA.                                                       |
| NM_014480.1    | ZNF544       | -2.269865 | Homo sapiens zinc finger protein 544 (ZNF544), mRNA.                                                                            |
| NM_006426.1    | DPYSL4       | -2.268969 | Homo sapiens dihydropyrimidinase-like 4 (DPYSL4), mRNA.                                                                         |

|                |          |           |                                                                                                                             |
|----------------|----------|-----------|-----------------------------------------------------------------------------------------------------------------------------|
| NR_001292.1    | SNORD108 | -2.267843 | Homo sapiens small nucleolar RNA, C/D box 108 (SNORD108), small nucleolar RNA.                                              |
| NM_003885.2    | CDK5R1   | -2.263895 | Homo sapiens cyclin-dependent kinase 5, regulatory subunit 1 (p35) (CDK5R1), mRNA.                                          |
| NM_013250.1    | ZNF215   | -2.262814 | Homo sapiens zinc finger protein 215 (ZNF215), mRNA.                                                                        |
| NM_014862.3    | ARNT2    | -2.262698 | Homo sapiens aryl-hydrocarbon receptor nuclear translocator 2 (ARNT2), mRNA.                                                |
| NM_024554.2    | PGBD5    | -2.262277 | Homo sapiens piggyBac transposable element derived 5 (PGBD5), mRNA.                                                         |
| NM_152329.3    | PPIL5    | -2.262052 | Homo sapiens peptidylprolyl isomerase (cyclophilin)-like 5 (PPIL5), transcript variant 1, mRNA.                             |
| NM_018369.1    | DEPDC1B  | -2.261629 | Homo sapiens DEP domain containing 1B (DEPDC1B), mRNA.                                                                      |
| NM_018136.3    | ASPM     | -2.259969 | Homo sapiens asp (abnormal spindle) homolog, microcephaly associated (Drosophila) (ASPM), mRNA.                             |
| NM_012202.1    | GNG3     | -2.25968  | Homo sapiens guanine nucleotide binding protein (G protein), gamma 3 (GNG3), mRNA.                                          |
| NM_198336.1    | INSIG1   | -2.256387 | Homo sapiens insulin induced gene 1 (INSIG1), transcript variant 2, mRNA.                                                   |
| NM_198445.2    | RINL     | -2.256382 | Homo sapiens Ras and Rab interactor-like (RINL), mRNA.                                                                      |
| NM_018518.3    | MCM10    | -2.255763 | Homo sapiens minichromosome maintenance complex component 10 (MCM10), transcript variant 2, mRNA.                           |
| NM_024719.2    | GRTP1    | -2.251642 | Homo sapiens growth hormone regulated TBC protein 1 (GRTP1), mRNA.                                                          |
| NM_005802.2    | TOPORS   | -2.25009  | Homo sapiens topoisomerase I binding, arginine/serine-rich (TOPORS), mRNA.                                                  |
| NM_019035.2    | PCDH18   | -2.246307 | Homo sapiens protocadherin 18 (PCDH18), mRNA.                                                                               |
| NM_016937.2    | POLA1    | -2.245145 | Homo sapiens polymerase (DNA directed), alpha 1, catalytic subunit (POLA1), mRNA.                                           |
| NM_020436.2    | SALL4    | -2.244758 | Homo sapiens sal-like 4 (Drosophila) (SALL4), mRNA.                                                                         |
| NM_138467.1    | TYW3     | -2.242608 | Homo sapiens tRNA-yW synthesizing protein 3 homolog (S. cerevisiae) (TYW3), mRNA.                                           |
| NM_016122.2    | CCDC41   | -2.238745 | Homo sapiens coiled-coil domain containing 41 (CCDC41), transcript variant 1, mRNA.                                         |
| NM_001080449.1 | DNA2     | -2.23597  | Homo sapiens DNA replication helicase 2 homolog (yeast) (DNA2), mRNA.                                                       |
| NM_153267.3    | MAMDC2   | -2.235629 | Homo sapiens MAM domain containing 2 (MAMDC2), mRNA.                                                                        |
| NM_144949.2    | SOCS5    | -2.235346 | Homo sapiens suppressor of cytokine signaling 5 (SOCS5), transcript variant 2, mRNA.                                        |
| NM_173582.3    | PGM2L1   | -2.232593 | Homo sapiens phosphoglucomutase 2-like 1 (PGM2L1), mRNA.                                                                    |
| NM_178558.3    | ZNF680   | -2.229517 | Homo sapiens zinc finger protein 680 (ZNF680), mRNA.                                                                        |
| NM_181676.1    | PPP2R2B  | -2.22856  | Homo sapiens protein phosphatase 2 (formerly 2A), regulatory subunit B, beta isoform (PPP2R2B), transcript variant 4, mRNA. |
| NM_032805.1    | ZSCAN10  | -2.228432 | Homo sapiens zinc finger and SCAN domain containing 10 (ZSCAN10), mRNA.                                                     |
| NM_057175.3    | NARG1    | -2.227658 | Homo sapiens NMDA receptor regulated 1 (NARG1), mRNA.                                                                       |
| NM_054016.1    | SFRS13A  | -2.226336 | Homo sapiens splicing factor, arginine/serine-rich 13A (SFRS13A), transcript variant 2, mRNA.                               |
| NM_004153.2    | ORC1L    | -2.224933 | Homo sapiens origin recognition complex, subunit 1-like (yeast) (ORC1L), mRNA.                                              |
| NM_001034194.1 | EXOSC9   | -2.224314 | Homo sapiens exosome component 9 (EXOSC9), transcript variant 1, mRNA.                                                      |
| NM_019886.2    | CHST7    | -2.222375 | Homo sapiens carbohydrate (N-acetylglucosamine 6-O) sulfotransferase 7 (CHST7), mRNA.                                       |
| NM_058246.3    | DNAJB6   | -2.219849 | Homo sapiens DnaJ (Hsp40) homolog, subfamily B, member 6 (DNAJB6), transcript variant 1, mRNA.                              |
| NM_018645.3    | HES6     | -2.217329 | Homo sapiens hairy and enhancer of split 6 (Drosophila) (HES6), mRNA.                                                       |
| NM_024037.1    | C1orf135 | -2.216984 | Homo sapiens chromosome 1 open reading frame 135 (C1orf135),                                                                |

|                |           |           |                                                                                                                           |
|----------------|-----------|-----------|---------------------------------------------------------------------------------------------------------------------------|
|                |           |           | mRNA.                                                                                                                     |
| NM_005189.1    | CBX2      | -2.210596 | Homo sapiens chromobox homolog 2 (Pc class homolog, Drosophila) (CBX2), transcript variant 1, mRNA.                       |
| NM_000859.1    | HMGCR     | -2.209555 | Homo sapiens 3-hydroxy-3-methylglutaryl-Coenzyme A reductase (HMGCR), mRNA.                                               |
| NM_007152.2    | ZNF195    | -2.209382 | Homo sapiens zinc finger protein 195 (ZNF195), mRNA.                                                                      |
| NM_007280.1    | OIP5      | -2.207592 | Homo sapiens Opa interacting protein 5 (OIP5), mRNA.                                                                      |
| NM_004856.4    | KIF23     | -2.206272 | Homo sapiens kinesin family member 23 (KIF23), transcript variant 2, mRNA.                                                |
| NM_001018160.1 | NAE1      | -2.205923 | Homo sapiens NEDD8 activating enzyme E1 subunit 1 (NAE1), transcript variant 3, mRNA.                                     |
| NM_019042.3    | PUS7      | -2.204779 | Homo sapiens pseudouridylate synthase 7 homolog (S. cerevisiae) (PUS7), mRNA.                                             |
| NM_006892.3    | DNMT3B    | -2.20451  | Homo sapiens DNA (cytosine-5-)-methyltransferase 3 beta (DNMT3B), transcript variant 1, mRNA.                             |
| NM_138285.3    | NUP35     | -2.200961 | Homo sapiens nucleoporin 35kDa (NUP35), mRNA.                                                                             |
| NM_001007157.1 | PHF14     | -2.198621 | Homo sapiens PHD finger protein 14 (PHF14), transcript variant 1, mRNA.                                                   |
| NM_006950.3    | SYN1      | -2.198428 | Homo sapiens synapsin I (SYN1), transcript variant la, mRNA.                                                              |
| NM_019106.4    | SEPT3     | -2.197992 | Homo sapiens septin 3 (SEPT3), transcript variant B, mRNA.                                                                |
| XR_040993.1    | LOC729082 | -2.197198 | PREDICTED: Homo sapiens misc_RNA (LOC729082), miscRNA.                                                                    |
| NR_003105.1    | ZWILCH    | -2.196975 | Homo sapiens Zwilch, kinetochore associated, homolog (Drosophila) (ZWILCH), transcript variant 2, transcribed RNA.        |
| NM_024098.1    | CCDC86    | -2.195915 | Homo sapiens coiled-coil domain containing 86 (CCDC86), mRNA.                                                             |
| NM_003012.3    | SFRP1     | -2.193358 | Homo sapiens secreted frizzled-related protein 1 (SFRP1), mRNA.                                                           |
| NM_138792.2    | LEO1      | -2.189913 | Homo sapiens Leo1, Paf1/RNA polymerase II complex component, homolog (S. cerevisiae) (LEO1), mRNA.                        |
| NM_001098525.1 | CKAP2     | -2.189321 | Homo sapiens cytoskeleton associated protein 2 (CKAP2), transcript variant 2, mRNA.                                       |
| NM_016299.2    | HSPA14    | -2.188773 | Homo sapiens heat shock 70kDa protein 14 (HSPA14), transcript variant 1, mRNA.                                            |
| NM_001168.2    | BIRC5     | -2.186204 | Homo sapiens baculoviral IAP repeat-containing 5 (BIRC5), transcript variant 1, mRNA.                                     |
| NM_014317.3    | PDSS1     | -2.185678 | Homo sapiens prenyl (decaprenyl) diphosphate synthase, subunit 1 (PDSS1), mRNA.                                           |
| NM_014431.1    | KIAA1274  | -2.185141 | Homo sapiens KIAA1274 (KIAA1274), mRNA.                                                                                   |
| NM_018728.2    | MYO5C     | -2.184255 | Homo sapiens myosin VC (MYO5C), mRNA.                                                                                     |
| NM_012083.2    | FRAT2     | -2.183249 | Homo sapiens frequently rearranged in advanced T-cell lymphomas 2 (FRAT2), mRNA.                                          |
| NM_002263.2    | KIFC1     | -2.182326 | Homo sapiens kinesin family member C1 (KIFC1), mRNA.                                                                      |
| XM_001125680.1 | LOC730432 | -2.182074 | PREDICTED: Homo sapiens similar to serine/threonine/tyrosine interacting protein, transcript variant 1 (LOC730432), mRNA. |
| NM_020726.3    | NLN       | -2.18138  | Homo sapiens neurolysin (metallopeptidase M3 family) (NLN), mRNA.                                                         |
| NM_015570.1    | AUTS2     | -2.180329 | Homo sapiens autism susceptibility candidate 2 (AUTS2), mRNA.                                                             |
| NM_018353.3    | C14orf106 | -2.179813 | Homo sapiens chromosome 14 open reading frame 106 (C14orf106), mRNA.                                                      |
| NM_015895.3    | GMNN      | -2.178742 | Homo sapiens geminin, DNA replication inhibitor (GMNN), mRNA.                                                             |
| NM_012247.3    | SEPHS1    | -2.174957 | Homo sapiens selenophosphate synthetase 1 (SEPHS1), mRNA.                                                                 |
| NM_032776.1    | JMJD1C    | -2.173318 | Homo sapiens jumonji domain containing 1C (JMJD1C), transcript variant 1, mRNA.                                           |
| NM_012124.1    | CHORDC1   | -2.173167 | Homo sapiens cysteine and histidine-rich domain (CHORD)-containing 1 (CHORDC1), mRNA.                                     |
| NM_199420.3    | POLQ      | -2.17245  | Homo sapiens polymerase (DNA directed), theta (POLQ), mRNA.                                                               |
| NM_017489.1    | TERF1     | -2.172419 | Homo sapiens telomeric repeat binding factor (NIMA-interacting) 1 (TERF1), transcript variant 1, mRNA.                    |
| NM_006875.2    | PIM2      | -2.172344 | Homo sapiens pim-2 oncogene (PIM2), mRNA.                                                                                 |

|                |          |           |                                                                                                                          |
|----------------|----------|-----------|--------------------------------------------------------------------------------------------------------------------------|
| NM_012482.3    | ZNF281   | -2.172209 | Homo sapiens zinc finger protein 281 (ZNF281), mRNA.                                                                     |
| NM_001002019.1 | PUS1     | -2.171728 | Homo sapiens pseudouridylate synthase 1 (PUS1), transcript variant 2, mRNA.                                              |
| NM_001025248.1 | DUT      | -2.171241 | Homo sapiens deoxyuridine triphosphatase (DUT), nuclear gene encoding mitochondrial protein, transcript variant 1, mRNA. |
| NM_019030.2    | DHX29    | -2.169254 | Homo sapiens DEAH (Asp-Glu-Ala-His) box polypeptide 29 (DHX29), mRNA.                                                    |
| NM_001040876.1 | ABCE1    | -2.154975 | Homo sapiens ATP-binding cassette, sub-family E (OABP), member 1 (ABCE1), transcript variant 2, mRNA.                    |
| NM_030919.2    | FAM83D   | -2.151738 | Homo sapiens family with sequence similarity 83, member D (FAM83D), mRNA.                                                |
| NM_001010940.1 | C9orf135 | -2.151406 | Homo sapiens chromosome 9 open reading frame 135 (C9orf135), mRNA.                                                       |
| NM_003390.2    | WEE1     | -2.149893 | Homo sapiens WEE1 homolog ( <i>S. pombe</i> ) (WEE1), mRNA.                                                              |
| BC037864       |          | -2.149693 | Homo sapiens cDNA clone IMAGE:5272804                                                                                    |
| NM_016052.3    | RRP15    | -2.149159 | Homo sapiens ribosomal RNA processing 15 homolog ( <i>S. cerevisiae</i> ) (RRP15), mRNA.                                 |
| NM_003916.3    | AP1S2    | -2.148544 | Homo sapiens adaptor-related protein complex 1, sigma 2 subunit (AP1S2), mRNA.                                           |
| NM_003916.3    | AP1S2    | -2.147476 | Homo sapiens adaptor-related protein complex 1, sigma 2 subunit (AP1S2), mRNA.                                           |
| NM_032171.1    | CEP78    | -2.147266 | Homo sapiens centrosomal protein 78kDa (CEP78), transcript variant 2, mRNA.                                              |
| NM_003503.2    | CDC7     | -2.14692  | Homo sapiens cell division cycle 7 homolog ( <i>S. cerevisiae</i> ) (CDC7), mRNA.                                        |
| NR_002912.1    | SNORA67  | -2.146051 | Homo sapiens small nucleolar RNA, H/ACA box 67 (SNORA67), small nucleolar RNA.                                           |
| NM_001010879.2 | ZIK1     | -2.144061 | Homo sapiens zinc finger protein interacting with K protein 1 homolog (mouse) (ZIK1), mRNA.                              |
| NM_021021.2    | SNTB1    | -2.141368 | Homo sapiens syntrophin, beta 1 (dystrophin-associated protein A1, 59kDa, basic component 1) (SNTB1), mRNA.              |
| NM_017412.2    | FZD3     | -2.138846 | Homo sapiens frizzled homolog 3 ( <i>Drosophila</i> ) (FZD3), mRNA.                                                      |
| NM_004508.2    | IDI1     | -2.138552 | Homo sapiens isopentenyl-diphosphate delta isomerase 1 (IDI1), mRNA.                                                     |
| BX537762       |          | -2.13836  | Homo sapiens mRNA; cDNA DKFZp779F0411 (from clone DKFZp779F0411)                                                         |
| NM_032860.3    | LTV1     | -2.137515 | Homo sapiens LTV1 homolog ( <i>S. cerevisiae</i> ) (LTV1), mRNA.                                                         |
| NM_006617.1    | NES      | -2.134659 | Homo sapiens nestin (NES), mRNA.                                                                                         |
| NM_001034194.1 | EXOSC9   | -2.134024 | Homo sapiens exosome component 9 (EXOSC9), transcript variant 1, mRNA.                                                   |
| NM_001077440.1 | BCLAF1   | -2.132395 | Homo sapiens BCL2-associated transcription factor 1 (BCLAF1), transcript variant 2, mRNA.                                |
| NM_001042610.1 | DBNDD1   | -2.130069 | Homo sapiens dysbindin (dystrobrevin binding protein 1) domain containing 1 (DBNDD1), transcript variant 1, mRNA.        |
| NM_002830.2    | PTPN4    | -2.12995  | Homo sapiens protein tyrosine phosphatase, non-receptor type 4 (megakaryocyte) (PTPN4), mRNA.                            |
| NM_145792.1    | MGST1    | -2.127705 | Homo sapiens microsomal glutathione S-transferase 1 (MGST1), transcript variant 1a, mRNA.                                |
| NM_006197.2    | PCM1     | -2.123255 | Homo sapiens pericentriolar material 1 (PCM1), mRNA.                                                                     |
| NM_032471.4    | PKIB     | -2.123032 | Homo sapiens protein kinase (cAMP-dependent, catalytic) inhibitor beta (PKIB), transcript variant 3, mRNA.               |
| NM_006479.3    | RAD51AP1 | -2.122621 | Homo sapiens RAD51 associated protein 1 (RAD51AP1), mRNA.                                                                |
| NM_001002259.1 | CAPRIN2  | -2.120813 | Homo sapiens caprin family member 2 (CAPRIN2), transcript variant 1, mRNA.                                               |
| NM_006745.3    | SC4MOL   | -2.120452 | Homo sapiens sterol-C4-methyl oxidase-like (SC4MOL), transcript variant 1, mRNA.                                         |
| NM_020685.3    | C3orf14  | -2.12009  | Homo sapiens chromosome 3 open reading frame 14 (C3orf14), mRNA.                                                         |

|                |              |           |                                                                                                             |
|----------------|--------------|-----------|-------------------------------------------------------------------------------------------------------------|
| NM_012250.3    | RRAS2        | -2.118279 | Homo sapiens related RAS viral (r-ras) oncogene homolog 2 (RRAS2), mRNA.                                    |
| NM_018846.2    | KLHL7        | -2.116314 | Homo sapiens kelch-like 7 (Drosophila) (KLHL7), transcript variant 2, mRNA.                                 |
| NM_002703.3    | PPAT         | -2.116258 | Homo sapiens phosphoribosyl pyrophosphate amidotransferase (PPAT), mRNA.                                    |
| NM_003276.1    | TMPO         | -2.113373 | Homo sapiens thymopoietin (TMPO), transcript variant 1, mRNA.                                               |
| NM_024595.1    | AKIRIN1      | -2.11228  | Homo sapiens akirin 1 (AKIRIN1), mRNA.                                                                      |
| NM_004321.4    | KIF1A        | -2.111551 | Homo sapiens kinesin family member 1A (KIF1A), mRNA.                                                        |
| NM_006802.2    | SF3A3        | -2.109976 | Homo sapiens splicing factor 3a, subunit 3, 60kDa (SF3A3), mRNA.                                            |
| NM_004792.2    | PPIG         | -2.106757 | Homo sapiens peptidylprolyl isomerase G (cyclophilin G) (PPIG), mRNA.                                       |
| NM_001099666.1 | PTAR1        | -2.104933 | Homo sapiens protein prenyltransferase alpha subunit repeat containing 1 (PTAR1), mRNA.                     |
| NM_023925.3    | CAPRIN2      | -2.101634 | Homo sapiens caprin family member 2 (CAPRIN2), transcript variant 2, mRNA.                                  |
| NM_017760.5    | NCAPG2       | -2.100361 | Homo sapiens non-SMC condensin II complex, subunit G2 (NCAPG2), mRNA.                                       |
| NM_032168.1    | WDR75        | -2.097438 | Homo sapiens WD repeat domain 75 (WDR75), mRNA.                                                             |
| NM_001025780.1 | FAM108B1     | -2.097015 | Homo sapiens family with sequence similarity 108, member B1 (FAM108B1), transcript variant 2, mRNA.         |
| XR_015176.2    | TYW1B        | -2.096112 | PREDICTED: Homo sapiens misc_RNA (TYW1B), miscRNA.                                                          |
| NM_198686.1    | RAB15        | -2.095562 | Homo sapiens RAB15, member RAS oncogene family (RAB15), mRNA.                                               |
| NM_004671.2    | PIAS2        | -2.093755 | Homo sapiens protein inhibitor of activated STAT, 2 (PIAS2), transcript variant beta, mRNA.                 |
| NM_018387.2    | STRBP        | -2.093214 | Homo sapiens spermatid perinuclear RNA binding protein (STRBP), mRNA.                                       |
| NM_018079.3    | SRBD1        | -2.090884 | Homo sapiens S1 RNA binding domain 1 (SRBD1), mRNA.                                                         |
| NM_005342.2    | HMGB3        | -2.089198 | Homo sapiens high-mobility group box 3 (HMGB3), mRNA.                                                       |
| NM_024755.2    | SLTM         | -2.08784  | Homo sapiens SAFB-like, transcription modulator (SLTM), transcript variant 1, mRNA.                         |
| NM_005381.2    | NCL          | -2.084943 | Homo sapiens nucleolin (NCL), mRNA.                                                                         |
| NM_000946.2    | PRIM1        | -2.08198  | Homo sapiens primase, DNA, polypeptide 1 (49kDa) (PRIM1), mRNA.                                             |
| XM_001723047.1 | LOC100132901 | -2.081865 | PREDICTED: Homo sapiens similar to KIAA1874 protein (LOC100132901), mRNA.                                   |
| NM_004280.3    | EEF1E1       | -2.080595 | Homo sapiens eukaryotic translation elongation factor 1 epsilon 1 (EEF1E1), mRNA.                           |
| NM_015187.3    | SEL1L3       | -2.076223 | Homo sapiens sel-1 suppressor of lin-12-like 3 (C. elegans) (SEL1L3), mRNA.                                 |
| NM_022346.3    | NCAPG        | -2.075397 | Homo sapiens non-SMC condensin I complex, subunit G (NCAPG), mRNA.                                          |
| NM_018169.2    | C12orf35     | -2.075071 | Homo sapiens chromosome 12 open reading frame 35 (C12orf35), mRNA.                                          |
| NM_003333.3    | UBA52        | -2.071065 | Homo sapiens ubiquitin A-52 residue ribosomal protein fusion product 1 (UBA52), transcript variant 2, mRNA. |
| NM_024945.1    | RMI1         | -2.068026 | Homo sapiens RMI1, RecQ mediated genome instability 1, homolog (S. cerevisiae) (RMI1), mRNA.                |
| NM_022805.2    | SNRPN        | -2.065371 | Homo sapiens small nuclear ribonucleoprotein polypeptide N (SNRPN), transcript variant 2, mRNA.             |
| NR_001561.1    | CYCSL1       | -2.065085 | Homo sapiens cytochrome c, somatic-like 1 (CYCSL1) on chromosome 6.                                         |
| NM_022074.2    | FAM111A      | -2.062076 | Homo sapiens family with sequence similarity 111, member A (FAM111A), transcript variant 1, mRNA.           |
| XR_017449.2    | LOC647150    | -2.059644 | PREDICTED: Homo sapiens misc_RNA (LOC647150), miscRNA.                                                      |
| NM_005914.2    | MCM4         | -2.053223 | Homo sapiens minichromosome maintenance complex component 4 (MCM4), transcript variant 1, mRNA.             |
| NM_138421.2    | SAAL1        | -2.049945 | Homo sapiens serum amyloid A-like 1 (SAAL1), mRNA.                                                          |
| NM_006729.3    | DIAPH2       | -2.048642 | Homo sapiens diaphanous homolog 2 (Drosophila) (DIAPH2), transcript                                         |

|                |              |           |                                                                                                                                     |
|----------------|--------------|-----------|-------------------------------------------------------------------------------------------------------------------------------------|
|                |              |           | variant 156, mRNA.                                                                                                                  |
| NM_002692.2    | POLE2        | -2.047799 | Homo sapiens polymerase (DNA directed), epsilon 2 (p59 subunit) (POLE2), mRNA.                                                      |
| NM_020401.2    | NUP107       | -2.043124 | Homo sapiens nucleoporin 107kDa (NUP107), mRNA.                                                                                     |
| NM_001384.4    | DPH2         | -2.042606 | Homo sapiens DPH2 homolog ( <i>S. cerevisiae</i> ) (DPH2), transcript variant 1, mRNA.                                              |
| NM_024032.2    | C17orf53     | -2.042441 | Homo sapiens chromosome 17 open reading frame 53 (C17orf53), mRNA.                                                                  |
| NM_017736.3    | THUMPD1      | -2.042321 | Homo sapiens THUMP domain containing 1 (THUMPD1), mRNA.                                                                             |
| NM_020236.2    | MRPL1        | -2.04232  | Homo sapiens mitochondrial ribosomal protein L1 (MRPL1), nuclear gene encoding mitochondrial protein, mRNA.                         |
| NM_000553.3    | WRN          | -2.041627 | Homo sapiens Werner syndrome (WRN), mRNA.                                                                                           |
| NM_001018160.1 | NAE1         | -2.040359 | Homo sapiens NEDD8 activating enzyme E1 subunit 1 (NAE1), transcript variant 3, mRNA.                                               |
| NM_017892.3    | PRPF40A      | -2.039571 | Homo sapiens PRP40 pre-mRNA processing factor 40 homolog A ( <i>S. cerevisiae</i> ) (PRPF40A), mRNA.                                |
| NM_032991.2    | CASP3        | -2.037361 | Homo sapiens caspase 3, apoptosis-related cysteine peptidase (CASP3), transcript variant beta, mRNA.                                |
| NM_001040876.1 | ABCE1        | -2.035343 | Homo sapiens ATP-binding cassette, sub-family E (OABP), member 1 (ABCE1), transcript variant 2, mRNA.                               |
| NM_080820.4    | DTD1         | -2.034862 | Homo sapiens D-tyrosyl-tRNA deacylase 1 homolog ( <i>S. cerevisiae</i> ) (DTD1), nuclear gene encoding mitochondrial protein, mRNA. |
| NM_005378.4    | MYCN         | -2.03264  | Homo sapiens v-myc myelocytomatosis viral related oncogene, neuroblastoma derived (avian) (MYCN), mRNA.                             |
| NM_003129.3    | SQLE         | -2.030881 | Homo sapiens squalene epoxidase (SQLE), mRNA.                                                                                       |
| NM_016447.2    | MPP6         | -2.030018 | Homo sapiens membrane protein, palmitoylated 6 (MAGUK p55 subfamily member 6) (MPP6), mRNA.                                         |
| NM_148174.2    | AZIN1        | -2.01757  | Homo sapiens antizyme inhibitor 1 (AZIN1), transcript variant 2, mRNA.                                                              |
| NM_014412.2    | CACYBP       | -2.014085 | Homo sapiens calcyclin binding protein (CACYBP), transcript variant 1, mRNA.                                                        |
| XR_037888.1    | LOC100128266 | -2.013594 | PREDICTED: Homo sapiens misc_RNA (LOC100128266), miscRNA.                                                                           |
| NM_001823.3    | CKB          | -2.012195 | Homo sapiens creatine kinase, brain (CKB), mRNA.                                                                                    |
| NM_006892.3    | DNMT3B       | -2.00701  | Homo sapiens DNA (cytosine-5-)-methyltransferase 3 beta (DNMT3B), transcript variant 1, mRNA.                                       |
| NM_004111.4    | FEN1         | -2.006428 | Homo sapiens flap structure-specific endonuclease 1 (FEN1), mRNA.                                                                   |

**Supplementary table 5: Genes up regulated in Day 20 as compared to Day 0**

| Refseq_NM      | Gene Symbol | D20/D12.fc | DEFINITION                                                                                                                       |
|----------------|-------------|------------|----------------------------------------------------------------------------------------------------------------------------------|
| NM_133505.2    | DCN         | 162.804    | Homo sapiens decorin (DCN), transcript variant C, mRNA.                                                                          |
| NM_004821.1    | HAND1       | 139.821    | Homo sapiens heart and neural crest derivatives expressed 1 (HAND1), mRNA.                                                       |
| NM_000090.3    | COL3A1      | 87.871     | Homo sapiens collagen, type III, alpha 1 (COL3A1), mRNA.                                                                         |
| NR_002196.1    | H19         | 85.521     | Homo sapiens H19, imprinted maternally expressed transcript (non-protein coding) (H19), non-coding RNA.                          |
| NM_024626.2    | VTCN1       | 82.579     | Homo sapiens V-set domain containing T cell activation inhibitor 1 (VTCN1), mRNA.                                                |
| NM_014211.1    | GABRP       | 81.411     | Homo sapiens gamma-aminobutyric acid (GABA) A receptor, pi (GABRP), mRNA.                                                        |
| NM_001430.3    | EPAS1       | 70.053     | Homo sapiens endothelial PAS domain protein 1 (EPAS1), mRNA.                                                                     |
| NM_057165.2    | COL6A3      | 66.164     | Homo sapiens collagen, type VI, alpha 3 (COL6A3), transcript variant 3, mRNA.                                                    |
| NM_004369.2    | COL6A3      | 63.564     | Homo sapiens collagen, type VI, alpha 3 (COL6A3), transcript variant 1, mRNA.                                                    |
| NM_002345.3    | LUM         | 59.950     | Homo sapiens lumican (LUM), mRNA.                                                                                                |
| NM_173054.1    | RELN        | 47.025     | Homo sapiens reelin (RELN), transcript variant 2, mRNA.                                                                          |
| NM_003063.2    | SLN         | 46.604     | Homo sapiens sarcolipin (SLN), mRNA.                                                                                             |
| NM_001042425.1 | TFAP2A      | 43.285     | Homo sapiens transcription factor AP-2 alpha (activating enhancer binding protein 2 alpha) (TFAP2A), transcript variant 3, mRNA. |
| NM_005613.3    | RGS4        | 42.137     | Homo sapiens regulator of G-protein signalling 4 (RGS4), mRNA.                                                                   |
| NM_000093.3    | COL5A1      | 40.979     | Homo sapiens collagen, type V, alpha 1 (COL5A1), mRNA.                                                                           |
| NM_000598.4    | IGFBP3      | 40.190     | Homo sapiens insulin-like growth factor binding protein 3 (IGFBP3), transcript variant 2, mRNA.                                  |
| NM_052947.3    | ALPK2       | 39.904     | Homo sapiens alpha-kinase 2 (ALPK2), mRNA.                                                                                       |
| NM_001013398.1 | IGFBP3      | 38.739     | Homo sapiens insulin-like growth factor binding protein 3 (IGFBP3), transcript variant 1, mRNA.                                  |
| NM_004613.2    | TGM2        | 36.125     | Homo sapiens transglutaminase 2 (C polypeptide, protein-glutamine-gamma-glutamyltransferase) (TGM2), transcript variant 1, mRNA. |
| NM_003068.3    | SNAI2       | 35.599     | Homo sapiens snail homolog 2 (Drosophila) (SNAI2), mRNA.                                                                         |
| NM_002404.1    | MFAP4       | 33.801     | Homo sapiens microfibrillar-associated protein 4 (MFAP4), mRNA.                                                                  |
| NM_002145.3    | HOXB2       | 33.640     | Homo sapiens homeobox B2 (HOXB2), mRNA.                                                                                          |
| NM_014585.3    | SLC40A1     | 32.469     | Homo sapiens solute carrier family 40 (iron-regulated transporter), member 1 (SLC40A1), mRNA.                                    |
| NM_001855.3    | COL15A1     | 31.048     | Homo sapiens collagen, type XV, alpha 1 (COL15A1), mRNA.                                                                         |
| NM_003836.4    | DLK1        | 30.983     | Homo sapiens delta-like 1 homolog (Drosophila) (DLK1), mRNA.                                                                     |
| NM_182920.1    | ADAMTS9     | 30.766     | Homo sapiens ADAM metalloproteinase with thrombospondin type 1 motif, 9 (ADAMTS9), mRNA.                                         |
| NM_000856.3    | GUCY1A3     | 30.608     | Homo sapiens guanylate cyclase 1, soluble, alpha 3 (GUCY1A3), mRNA.                                                              |
| NM_002160.2    | TNC         | 29.931     | Homo sapiens tenascin C (TNC), mRNA.                                                                                             |
| NM_172315.1    | MEIS2       | 29.870     | Homo sapiens Meis homeobox 2 (MEIS2), transcript variant g, mRNA.                                                                |
| NM_001007139.3 | IGF2        | 29.801     | Homo sapiens insulin-like growth factor 2 (somatomedin A) (IGF2), transcript variant 2, mRNA.                                    |
| NM_000599.2    | IGFBP5      | 29.482     | Homo sapiens insulin-like growth factor binding protein 5 (IGFBP5), mRNA.                                                        |
| NM_178565.3    | RSPO2       | 29.278     | Homo sapiens R-spondin 2 homolog (Xenopus laevis) (RSPO2), mRNA.                                                                 |
| NM_015507.2    | EGFL6       | 26.999     | Homo sapiens EGF-like-domain, multiple 6 (EGFL6), mRNA.                                                                          |
| NM_000599.2    | IGFBP5      | 26.800     | Homo sapiens insulin-like growth factor binding protein 5 (IGFBP5), mRNA.                                                        |
| NM_003062.1    | SLIT3       | 26.070     | Homo sapiens slit homolog 3 (Drosophila) (SLIT3), mRNA.                                                                          |



|                |           |        |                                                                                                                   |
|----------------|-----------|--------|-------------------------------------------------------------------------------------------------------------------|
| NM_000900.2    | MGP       | 23.730 | Homo sapiens matrix Gla protein (MGP), mRNA.                                                                      |
| NM_021005.2    | NR2F2     | 23.443 | Homo sapiens nuclear receptor subfamily 2, group F, member 2 (NR2F2), mRNA.                                       |
| NM_153321.1    | PMP22     | 23.305 | Homo sapiens peripheral myelin protein 22 (PMP22), transcript variant 2, mRNA.                                    |
| NM_000612.2    | IGF2      | 22.730 | Homo sapiens insulin-like growth factor 2 (somatomedin A) (IGF2), mRNA.                                           |
| NM_002448.3    | MSX1      | 22.710 | Homo sapiens msh homeobox 1 (MSX1), mRNA.                                                                         |
| NM_203411.1    | TMEM88    | 21.612 | Homo sapiens transmembrane protein 88 (TMEM88), mRNA.                                                             |
| NM_004994.2    | MMP9      | 21.467 | Homo sapiens matrix metalloproteinase 9 (gelatinase B, 92kDa gelatinase, 92kDa type IV collagenase) (MMP9), mRNA. |
| NM_000039.1    | APOA1     | 20.968 | Homo sapiens apolipoprotein A-I (APOA1), mRNA.                                                                    |
| XM_001130278.1 | MAB21L2   | 20.859 | PREDICTED: Homo sapiens mab-21-like 2 (C. elegans) (MAB21L2), mRNA.                                               |
| NM_003873.4    | NRP1      | 20.568 | Homo sapiens neuropilin 1 (NRP1), transcript variant 1, mRNA.                                                     |
| NM_015419.2    | MXRA5     | 20.373 | Homo sapiens matrix-remodelling associated 5 (MXRA5), mRNA.                                                       |
| NM_184085.1    | TRIM55    | 20.218 | Homo sapiens tripartite motif-containing 55 (TRIM55), transcript variant 1, mRNA.                                 |
| NM_024911.4    | GPR177    | 20.020 | Homo sapiens G protein-coupled receptor 177 (GPR177), transcript variant 1, mRNA.                                 |
| NM_184086.1    | TRIM55    | 19.834 | Homo sapiens tripartite motif-containing 55 (TRIM55), transcript variant 3, mRNA.                                 |
| NM_000089.3    | COL1A2    | 19.678 | Homo sapiens collagen, type I, alpha 2 (COL1A2), mRNA.                                                            |
| NM_000089.3    | COL1A2    | 19.404 | Homo sapiens collagen, type I, alpha 2 (COL1A2), mRNA.                                                            |
| XM_378360      |           | 19.389 | PREDICTED: Homo sapiens hypothetical LOC400043 (LOC400043), mRNA                                                  |
| NM_005161.3    | APLNR     | 19.317 | Homo sapiens apelin receptor (APLNR), mRNA.                                                                       |
| NM_031476.2    | CRISPLD2  | 19.231 | Homo sapiens cysteine-rich secretory protein LCCL domain containing 2 (CRISPLD2), mRNA.                           |
| NM_133265.2    | AMOT      | 17.903 | Homo sapiens angiominin (AMOT), transcript variant 2, mRNA.                                                       |
| NM_153366.2    | SVEP1     | 17.403 | Homo sapiens sushi, von Willebrand factor type A, EGF and pentraxin domain containing 1 (SVEP1), mRNA.            |
| NM_015507.2    | EGFL6     | 17.205 | Homo sapiens EGF-like-domain, multiple 6 (EGFL6), mRNA.                                                           |
| NM_198552.1    | FAM89A    | 17.132 | Homo sapiens family with sequence similarity 89, member A (FAM89A), mRNA.                                         |
| NM_001553.1    | IGFBP7    | 16.959 | Homo sapiens insulin-like growth factor binding protein 7 (IGFBP7), mRNA.                                         |
| NM_021965.3    | PGM5      | 16.935 | Homo sapiens phosphoglucomutase 5 (PGM5), mRNA.                                                                   |
| NM_005630.1    | SLCO2A1   | 16.422 | Homo sapiens solute carrier organic anion transporter family, member 2A1 (SLCO2A1), mRNA.                         |
| NM_181712.3    | ANKRD38   | 16.165 | Homo sapiens ankyrin repeat domain 38 (ANKRD38), mRNA.                                                            |
| XM_001126087.1 | LOC728473 | 16.127 | PREDICTED: Homo sapiens hypothetical LOC728473 (LOC728473), mRNA.                                                 |
| NM_001001936.1 | AFAP1L2   | 16.125 | Homo sapiens actin filament associated protein 1-like 2 (AFAP1L2), transcript variant 1, mRNA.                    |
| NM_181712.4    | KANK4     | 16.064 | Homo sapiens KN motif and ankyrin repeat domains 4 (KANK4), mRNA.                                                 |
| NM_001037582.1 | SCD5      | 15.892 | Homo sapiens stearyl-CoA desaturase 5 (SCD5), transcript variant 1, mRNA.                                         |
| NM_005045.2    | RELN      | 15.779 | Homo sapiens reelin (RELN), transcript variant 1, mRNA.                                                           |
| NM_130386.1    | COLEC12   | 15.631 | Homo sapiens collectin sub-family member 12 (COLEC12), mRNA.                                                      |
| NM_032777.6    | GPR124    | 15.619 | Homo sapiens G protein-coupled receptor 124 (GPR124), mRNA.                                                       |
| NM_001048.3    | SST       | 15.576 | Homo sapiens somatostatin (SST), mRNA.                                                                            |
| NM_021965.3    | PGM5      | 15.564 | Homo sapiens phosphoglucomutase 5 (PGM5), mRNA.                                                                   |
| NM_139212.2    | HOPX      | 15.380 | Homo sapiens HOP homeobox (HOPX), transcript variant 3, mRNA.                                                     |
| NM_002202.1    | ISL1      | 15.240 | Homo sapiens ISL1 transcription factor, LIM/homeodomain, (islet-                                                  |

|                |              |        |                                                                                                                                  |
|----------------|--------------|--------|----------------------------------------------------------------------------------------------------------------------------------|
|                |              |        | 1) (ISL1), mRNA.                                                                                                                 |
| NM_004887.3    | CXCL14       | 15.145 | Homo sapiens chemokine (C-X-C motif) ligand 14 (CXCL14), mRNA.                                                                   |
| NM_025140.1    | CCDC92       | 15.031 | Homo sapiens coiled-coil domain containing 92 (CCDC92), mRNA.                                                                    |
| NM_002476.2    | MYL4         | 15.022 | Homo sapiens myosin, light chain 4, alkali; atrial, embryonic (MYL4), transcript variant 2, mRNA.                                |
| NM_133337.1    | FER1L3       | 14.677 | Homo sapiens fer-1-like 3, myoferlin (C. elegans) (FER1L3), transcript variant 2, mRNA.                                          |
| NM_001012964.1 | KLK6         | 14.360 | Homo sapiens kallikrein-related peptidase 6 (KLK6), transcript variant B, mRNA.                                                  |
| NM_002345.3    | LUM          | 14.100 | Homo sapiens lumican (LUM), mRNA.                                                                                                |
| NM_013451.3    | MYOF         | 13.938 | Homo sapiens myoferlin (MYOF), transcript variant 1, mRNA.                                                                       |
| NM_013231.4    | FLRT2        | 13.735 | Homo sapiens fibronectin leucine rich transmembrane protein 2 (FLRT2), mRNA.                                                     |
| NM_004120.3    | GBP2         | 13.548 | Homo sapiens guanylate binding protein 2, interferon-inducible (GBP2), mRNA.                                                     |
| XR_038625.1    | LOC100132535 | 13.311 | PREDICTED: Homo sapiens misc_RNA (LOC100132535), miscRNA.                                                                        |
| NM_153427.1    | PITX2        | 13.280 | Homo sapiens paired-like homeodomain 2 (PITX2), transcript variant 1, mRNA.                                                      |
| NM_001643.1    | APOA2        | 13.242 | Homo sapiens apolipoprotein A-II (APOA2), mRNA.                                                                                  |
| NM_001002292.1 | GPR177       | 13.145 | Homo sapiens G protein-coupled receptor 177 (GPR177), transcript variant 2, mRNA.                                                |
| NM_001017973.1 | P4HA2        | 12.969 | Homo sapiens prolyl 4-hydroxylase, alpha polypeptide II (P4HA2), transcript variant 2, mRNA.                                     |
| NM_000389.2    | CDKN1A       | 12.900 | Homo sapiens cyclin-dependent kinase inhibitor 1A (p21, Cip1) (CDKN1A), transcript variant 1, mRNA.                              |
| NM_032413.2    | C15orf48     | 12.897 | Homo sapiens chromosome 15 open reading frame 48 (C15orf48), transcript variant 2, mRNA.                                         |
| NM_001032280.2 | TFAP2A       | 12.842 | Homo sapiens transcription factor AP-2 alpha (activating enhancer binding protein 2 alpha) (TFAP2A), transcript variant 2, mRNA. |
| NM_006727.2    | CDH10        | 12.682 | Homo sapiens cadherin 10, type 2 (T2-cadherin) (CDH10), mRNA.                                                                    |
| NM_033255.2    | EPSTI1       | 12.558 | Homo sapiens epithelial stromal interaction 1 (breast) (EPSTI1), transcript variant 2, mRNA.                                     |
| NM_014899.3    | RHOBTB3      | 12.533 | Homo sapiens Rho-related BTB domain containing 3 (RHOBTB3), mRNA.                                                                |
| NM_024574.3    | C4orf31      | 12.202 | Homo sapiens chromosome 4 open reading frame 31 (C4orf31), mRNA.                                                                 |
| NM_000362.4    | TIMP3        | 12.094 | Homo sapiens TIMP metallopeptidase inhibitor 3 (TIMP3), mRNA.                                                                    |
| NM_001630.1    | ANXA8        | 12.061 | Homo sapiens annexin A8 (ANXA8), mRNA.                                                                                           |
| NM_000088.3    | COL1A1       | 11.801 | Homo sapiens collagen, type I, alpha 1 (COL1A1), mRNA.                                                                           |
| NM_031910.3    | C1QTNF6      | 11.786 | Homo sapiens C1q and tumor necrosis factor related protein 6 (C1QTNF6), transcript variant 1, mRNA.                              |
| NM_007361.3    | NID2         | 11.751 | Homo sapiens nidogen 2 (osteonidogen) (NID2), mRNA.                                                                              |
| NM_004207.2    | SLC16A3      | 11.642 | Homo sapiens solute carrier family 16, member 3 (monocarboxylic acid transporter 4) (SLC16A3), transcript variant 2, mRNA.       |
| NM_000963.1    | PTGS2        | 11.568 | Homo sapiens prostaglandin-endoperoxide synthase 2 (prostaglandin G/H synthase and cyclooxygenase) (PTGS2), mRNA.                |
| NM_152611.2    | C20orf75     | 11.505 | Homo sapiens chromosome 20 open reading frame 75 (C20orf75), mRNA.                                                               |
| NM_032550.2    | AFAP1L2      | 11.431 | Homo sapiens actin filament associated protein 1-like 2 (AFAP1L2), transcript variant 2, mRNA.                                   |
| NM_206966.2    | C5orf46      | 11.356 | Homo sapiens chromosome 5 open reading frame 46 (C5orf46), mRNA.                                                                 |
| NM_018689.1    | KIAA1199     | 11.215 | Homo sapiens KIAA1199 (KIAA1199), mRNA.                                                                                          |

|                |         |        |                                                                                                                                                                          |
|----------------|---------|--------|--------------------------------------------------------------------------------------------------------------------------------------------------------------------------|
| NM_002353.1    | TACSTD2 | 11.057 | Homo sapiens tumor-associated calcium signal transducer 2 (TACSTD2), mRNA.                                                                                               |
| AB074172       |         | 10.923 | Homo sapiens primary neuroblastoma cDNA, clone:Nbla10111, full insert sequence                                                                                           |
| NM_201525.1    | GPR56   | 10.861 | Homo sapiens G protein-coupled receptor 56 (GPR56), transcript variant 3, mRNA.                                                                                          |
| NM_005512.1    | LRRC32  | 10.792 | Homo sapiens leucine rich repeat containing 32 (LRRC32), mRNA.                                                                                                           |
| XM_939093.1    | FAM89A  | 10.578 | PREDICTED: Homo sapiens family with sequence similarity 89, member A (FAM89A), mRNA.                                                                                     |
| NM_006472.2    | TXNIP   | 10.531 | Homo sapiens thioredoxin interacting protein (TXNIP), mRNA.                                                                                                              |
| NM_000316.2    | PTH1R   | 10.520 | Homo sapiens parathyroid hormone 1 receptor (PTH1R), mRNA.                                                                                                               |
| NM_021205.4    | RHOA    | 10.370 | Homo sapiens ras homolog gene family, member U (RHOA), mRNA.                                                                                                             |
| NM_001032278.1 | MMP28   | 10.274 | Homo sapiens matrix metalloproteinase 28 (MMP28), transcript variant 3, mRNA.                                                                                            |
| NM_133468.3    | BMPER   | 10.273 | Homo sapiens BMP binding endothelial regulator (BMPER), mRNA.                                                                                                            |
| NM_002317.3    | LOX     | 10.257 | Homo sapiens lysyl oxidase (LOX), mRNA.                                                                                                                                  |
| NM_003966.2    | SEMA5A  | 10.006 | Homo sapiens sema domain, seven thrombospondin repeats (type 1 and type 1-like), transmembrane domain (TM) and short cytoplasmic domain, (semaphorin) 5A (SEMA5A), mRNA. |
| NM_032784.3    | RSPO3   | 9.974  | Homo sapiens R-spondin 3 homolog (Xenopus laevis) (RSPO3), mRNA.                                                                                                         |
| NM_022873.2    | IFI6    | 9.844  | Homo sapiens interferon, alpha-inducible protein 6 (IFI6), transcript variant 3, mRNA.                                                                                   |
| NM_000371.1    | TTR     | 9.805  | Homo sapiens transthyretin (prealbumin, amyloidosis type I) (TTR), mRNA.                                                                                                 |
| NM_001453.1    | FOXC1   | 9.793  | Homo sapiens forkhead box C1 (FOXC1), mRNA.                                                                                                                              |
| NM_003118.2    | SPARC   | 9.732  | Homo sapiens secreted protein, acidic, cysteine-rich (osteonectin) (SPARC), mRNA.                                                                                        |
| NM_005195.3    | CEBPD   | 9.726  | Homo sapiens CCAAT/enhancer binding protein (C/EBP), delta (CEBPD), mRNA.                                                                                                |
| NM_016613.5    | C4orf18 | 9.701  | Homo sapiens chromosome 4 open reading frame 18 (C4orf18), transcript variant 2, mRNA.                                                                                   |
| NM_001040708.1 | HEY1    | 9.659  | Homo sapiens hairy/enhancer-of-split related with YRPW motif 1 (HEY1), transcript variant 2, mRNA.                                                                       |
| NM_007173.4    | PRSS23  | 9.601  | Homo sapiens protease, serine, 23 (PRSS23), mRNA.                                                                                                                        |
| NM_014890.2    | FILIP1L | 9.581  | Homo sapiens filamin A interacting protein 1-like (FILIP1L), transcript variant 2, mRNA.                                                                                 |
| NM_182799.1    | EGFLAM  | 9.558  | Homo sapiens EGF-like, fibronectin type III and laminin G domains (EGFLAM), transcript variant 3, mRNA.                                                                  |
| NM_000053.2    | ATP7B   | 9.507  | Homo sapiens ATPase, Cu <sup>++</sup> transporting, beta polypeptide (ATP7B), transcript variant 1, mRNA.                                                                |
| NM_000393.3    | COL5A2  | 9.429  | Homo sapiens collagen, type V, alpha 2 (COL5A2), mRNA.                                                                                                                   |
| NM_002581.3    | PAPPA   | 9.425  | Homo sapiens pregnancy-associated plasma protein A, pappalysin 1 (PAPPA), mRNA.                                                                                          |
| NM_000638.3    | VTN     | 9.295  | Homo sapiens vitronectin (VTN), mRNA.                                                                                                                                    |
| NM_002609.3    | PDGFRB  | 9.294  | Homo sapiens platelet-derived growth factor receptor, beta polypeptide (PDGFRB), mRNA.                                                                                   |
| NM_014579.1    | SLC39A2 | 9.286  | Homo sapiens solute carrier family 39 (zinc transporter), member 2 (SLC39A2), mRNA.                                                                                      |
| NM_001098816.2 | ODZ4    | 9.208  | Homo sapiens odz, odd Oz/ten-m homolog 4 (Drosophila) (ODZ4), mRNA.                                                                                                      |
| NM_004503.3    | HOXC6   | 9.095  | Homo sapiens homeobox C6 (HOXC6), transcript variant 1, mRNA.                                                                                                            |
| NM_001920.3    | DCN     | 9.022  | Homo sapiens decorin (DCN), transcript variant A1, mRNA.                                                                                                                 |
| NM_013451.2    | FER1L3  | 9.014  | Homo sapiens fer-1-like 3, myoferlin (C. elegans) (FER1L3), transcript variant 1, mRNA.                                                                                  |

|                |          |       |                                                                                                                                                    |
|----------------|----------|-------|----------------------------------------------------------------------------------------------------------------------------------------------------|
| NM_018993.2    | RIN2     | 8.961 | Homo sapiens Ras and Rab interactor 2 (RIN2), mRNA.                                                                                                |
| NM_020547.1    | AMHR2    | 8.919 | Homo sapiens anti-Mullerian hormone receptor, type II (AMHR2), mRNA.                                                                               |
| NM_032772.3    | ZNF503   | 8.919 | Homo sapiens zinc finger protein 503 (ZNF503), mRNA.                                                                                               |
| NM_145057.2    | CDC42EP5 | 8.903 | Homo sapiens CDC42 effector protein (Rho GTPase binding) 5 (CDC42EP5), mRNA.                                                                       |
| NM_001017974.1 | P4HA2    | 8.903 | Homo sapiens prolyl 4-hydroxylase, alpha polypeptide II (P4HA2), transcript variant 3, mRNA.                                                       |
| NM_138444.3    | KCTD12   | 8.850 | Homo sapiens potassium channel tetramerisation domain containing 12 (KCTD12), mRNA.                                                                |
| NM_001323.2    | CST6     | 8.792 | Homo sapiens cystatin E/M (CST6), mRNA.                                                                                                            |
| NM_018670.2    | MESP1    | 8.779 | Homo sapiens mesoderm posterior 1 homolog (mouse) (MESP1), mRNA.                                                                                   |
| NM_144966.4    | FREM1    | 8.776 | Homo sapiens FRAS1 related extracellular matrix 1 (FREM1), mRNA.                                                                                   |
| NM_145260.2    | OSR1     | 8.743 | Homo sapiens odd-skipped related 1 (Drosophila) (OSR1), mRNA.                                                                                      |
| NM_001620.1    | AHNAK    | 8.739 | Homo sapiens AHNAK nucleoprotein (AHNAK), transcript variant 1, mRNA.                                                                              |
| NM_019885.2    | CYP26B1  | 8.721 | Homo sapiens cytochrome P450, family 26, subfamily B, polypeptide 1 (CYP26B1), mRNA.                                                               |
| NM_078487.2    | CDKN2B   | 8.429 | Homo sapiens cyclin-dependent kinase inhibitor 2B (p15, inhibits CDK4) (CDKN2B), transcript variant 2, mRNA.                                       |
| NM_001884.2    | HAPLN1   | 8.395 | Homo sapiens hyaluronan and proteoglycan link protein 1 (HAPLN1), mRNA.                                                                            |
| NM_022658.3    | HOXC8    | 8.394 | Homo sapiens homeobox C8 (HOXC8), mRNA.                                                                                                            |
| NM_020311.2    | CXCR7    | 8.386 | Homo sapiens chemokine (C-X-C motif) receptor 7 (CXCR7), mRNA.                                                                                     |
| NM_022131.1    | CLSTN2   | 8.371 | Homo sapiens calyntenin 2 (CLSTN2), mRNA.                                                                                                          |
| NM_012342.2    | BAMBI    | 8.368 | Homo sapiens BMP and activin membrane-bound inhibitor homolog (Xenopus laevis) (BAMBI), mRNA.                                                      |
| NM_201524.1    | GPR56    | 8.311 | Homo sapiens G protein-coupled receptor 56 (GPR56), transcript variant 2, mRNA.                                                                    |
| NM_006475.1    | POSTN    | 8.272 | Homo sapiens periostin, osteoblast specific factor (POSTN), mRNA.                                                                                  |
| NM_001898.2    | CST1     | 8.056 | Homo sapiens cystatin SN (CST1), mRNA.                                                                                                             |
| NM_006108.2    | SPON1    | 8.056 | Homo sapiens spondin 1, extracellular matrix protein (SPON1), mRNA.                                                                                |
| NM_002449.4    | MSX2     | 8.000 | Homo sapiens msh homeobox 2 (MSX2), mRNA.                                                                                                          |
| NM_016269.2    | LEF1     | 7.923 | Homo sapiens lymphoid enhancer-binding factor 1 (LEF1), mRNA.                                                                                      |
| BC062365       |          | 7.882 | Homo sapiens cDNA clone IMAGE:5922621, partial cds                                                                                                 |
| NM_080645.2    | COL12A1  | 7.855 | Homo sapiens collagen, type XII, alpha 1 (COL12A1), transcript variant short, mRNA.                                                                |
| NM_003392.3    | WNT5A    | 7.773 | Homo sapiens wingless-type MMTV integration site family, member 5A (WNT5A), mRNA.                                                                  |
| NM_024911.4    | GPR177   | 7.729 | Homo sapiens G protein-coupled receptor 177 (GPR177), transcript variant 1, mRNA.                                                                  |
| NM_002026.2    | FN1      | 7.659 | Homo sapiens fibronectin 1 (FN1), transcript variant 3, mRNA.                                                                                      |
| NM_001711.3    | BGN      | 7.617 | Homo sapiens biglycan (BGN), mRNA.                                                                                                                 |
| NM_207336.1    | ZNF467   | 7.574 | Homo sapiens zinc finger protein 467 (ZNF467), mRNA.                                                                                               |
| NM_015036.1    | ENDOD1   | 7.567 | Homo sapiens endonuclease domain containing 1 (ENDOD1), mRNA.                                                                                      |
| NM_000700.1    | ANXA1    | 7.559 | Homo sapiens annexin A1 (ANXA1), mRNA.                                                                                                             |
| NM_003250.4    | THRA     | 7.482 | Homo sapiens thyroid hormone receptor, alpha (erythroblastic leukemia viral (v-erb-a) oncogene homolog, avian) (THRA), transcript variant 2, mRNA. |
| NM_024519.2    | FAM65A   | 7.473 | Homo sapiens family with sequence similarity 65, member A (FAM65A), mRNA.                                                                          |

|                |              |       |                                                                                                                                 |
|----------------|--------------|-------|---------------------------------------------------------------------------------------------------------------------------------|
| NM_003979.3    | GPRC5A       | 7.302 | Homo sapiens G protein-coupled receptor, family C, group 5, member A (GPRC5A), mRNA.                                            |
| NM_198391.1    | FLRT3        | 7.263 | Homo sapiens fibronectin leucine rich transmembrane protein 3 (FLRT3), transcript variant 2, mRNA.                              |
| NM_004787.1    | SLIT2        | 7.252 | Homo sapiens slit homolog 2 (Drosophila) (SLIT2), mRNA.                                                                         |
| NM_021965.3    | PGM5         | 7.171 | Homo sapiens phosphoglucomutase 5 (PGM5), mRNA.                                                                                 |
| NM_000856.2    | GUCY1A3      | 7.152 | Homo sapiens guanylate cyclase 1, soluble, alpha 3 (GUCY1A3), mRNA.                                                             |
| NM_003206.2    | TCF21        | 7.119 | Homo sapiens transcription factor 21 (TCF21), transcript variant 2, mRNA.                                                       |
| NM_002048.1    | GAS1         | 7.109 | Homo sapiens growth arrest-specific 1 (GAS1), mRNA.                                                                             |
| NM_032181.1    | TMEM166      | 7.059 | Homo sapiens transmembrane protein 166 (TMEM166), mRNA.                                                                         |
| NM_000905.2    | NPY          | 7.058 | Homo sapiens neuropeptide Y (NPY), mRNA.                                                                                        |
| NM_005585.3    | SMAD6        | 7.045 | Homo sapiens SMAD family member 6 (SMAD6), transcript variant 1, mRNA.                                                          |
| NM_020877.2    | DNAH2        | 7.035 | Homo sapiens dynein, axonemal, heavy chain 2 (DNAH2), mRNA.                                                                     |
| NM_001124758.1 | SPNS2        | 7.033 | Homo sapiens spinster homolog 2 (Drosophila) (SPNS2), mRNA.                                                                     |
| NM_130851.1    | BMP4         | 6.955 | Homo sapiens bone morphogenetic protein 4 (BMP4), transcript variant 3, mRNA.                                                   |
| XM_001722168.1 | LOC100128893 | 6.936 | PREDICTED: Homo sapiens hypothetical protein LOC100128893 (LOC100128893), mRNA.                                                 |
| NM_006206.3    | PDGFRA       | 6.913 | Homo sapiens platelet-derived growth factor receptor, alpha polypeptide (PDGFRA), mRNA.                                         |
| NR_024430.1    | LOC399959    | 6.901 | Homo sapiens hypothetical LOC399959 (LOC399959), non-coding RNA.                                                                |
| NM_006287.4    | TFPI         | 6.893 | Homo sapiens tissue factor pathway inhibitor (lipoprotein-associated coagulation inhibitor) (TFPI), transcript variant 1, mRNA. |
| NM_002398.2    | MEIS1        | 6.856 | Homo sapiens Meis homeobox 1 (MEIS1), mRNA.                                                                                     |
| NM_001007097.1 | NTRK2        | 6.853 | Homo sapiens neurotrophic tyrosine kinase, receptor, type 2 (NTRK2), transcript variant b, mRNA.                                |
| XM_001129442.1 | CST6         | 6.849 | PREDICTED: Homo sapiens cystatin E/M (CST6), mRNA.                                                                              |
| NM_001042377.1 | INS-IGF2     | 6.821 | Homo sapiens insulin- insulin-like growth factor 2 (INS-IGF2), transcript variant 1, mRNA.                                      |
| NM_207304.1    | MBNL2        | 6.814 | Homo sapiens muscleblind-like 2 (Drosophila) (MBNL2), transcript variant 3, mRNA.                                               |
| NM_018110.2    | DOK4         | 6.723 | Homo sapiens docking protein 4 (DOK4), mRNA.                                                                                    |
| NM_003243.2    | TGFBR3       | 6.705 | Homo sapiens transforming growth factor, beta receptor III (TGFBR3), mRNA.                                                      |
| NM_002023.3    | FMOD         | 6.644 | Homo sapiens fibromodulin (FMOD), mRNA.                                                                                         |
| NM_001001391.1 | CD44         | 6.624 | Homo sapiens CD44 molecule (Indian blood group) (CD44), transcript variant 4, mRNA.                                             |
| NM_016352.2    | CPA4         | 6.545 | Homo sapiens carboxypeptidase A4 (CPA4), mRNA.                                                                                  |
| NM_005328.1    | HAS2         | 6.490 | Homo sapiens hyaluronan synthase 2 (HAS2), mRNA.                                                                                |
| NM_012242.2    | DKK1         | 6.475 | Homo sapiens dickkopf homolog 1 (Xenopus laevis) (DKK1), mRNA.                                                                  |
| NM_006885.3    | ZFHX3        | 6.456 | Homo sapiens zinc finger homeobox 3 (ZFHX3), transcript variant A, mRNA.                                                        |
| NM_024423.1    | DSC3         | 6.451 | Homo sapiens desmocollin 3 (DSC3), transcript variant Dsc3b, mRNA.                                                              |
| NM_003670.1    | BHLHB2       | 6.448 | Homo sapiens basic helix-loop-helix domain containing, class B, 2 (BHLHB2), mRNA.                                               |
| NM_002160.1    | TNC          | 6.437 | Homo sapiens tenascin C (hexabrachion) (TNC), mRNA.                                                                             |
| NM_006206.3    | PDGFRA       | 6.400 | Homo sapiens platelet-derived growth factor receptor, alpha polypeptide (PDGFRA), mRNA.                                         |
| NM_000509.4    | FGG          | 6.399 | Homo sapiens fibrinogen gamma chain (FGG), transcript variant gamma-A, mRNA.                                                    |

|                |           |       |                                                                                                              |
|----------------|-----------|-------|--------------------------------------------------------------------------------------------------------------|
| AK025332       |           | 6.390 | Homo sapiens cDNA: FLJ21679 fis, clone COL09221                                                              |
| NM_001078.2    | VCAM1     | 6.363 | Homo sapiens vascular cell adhesion molecule 1 (VCAM1), transcript variant 1, mRNA.                          |
| NM_016267.2    | VGLL1     | 6.343 | Homo sapiens vestigial like 1 (Drosophila) (VGLL1), mRNA.                                                    |
| NM_017633.2    | FAM46A    | 6.316 | Homo sapiens family with sequence similarity 46, member A (FAM46A), mRNA.                                    |
| NM_020962.1    | IGDCC4    | 6.303 | Homo sapiens immunoglobulin superfamily, DCC subclass, member 4 (IGDCC4), mRNA.                              |
| NM_001047841.1 | CXCR7     | 6.300 | Homo sapiens chemokine (C-X-C motif) receptor 7 (CXCR7), transcript variant 1, mRNA.                         |
| NM_001080951.1 | PLAGL1    | 6.292 | Homo sapiens pleiomorphic adenoma gene-like 1 (PLAGL1), transcript variant 3, mRNA.                          |
| NM_032041.1    | NCALD     | 6.266 | Homo sapiens neurocalcin delta (NCALD), mRNA.                                                                |
| NM_004428.2    | EFNA1     | 6.231 | Homo sapiens ephrin-A1 (EFNA1), transcript variant 1, mRNA.                                                  |
| NM_025202.2    | EFHD1     | 6.223 | Homo sapiens EF-hand domain family, member D1 (EFHD1), mRNA.                                                 |
| XM_001126471.1 | LOC730278 | 6.220 | PREDICTED: Homo sapiens hypothetical LOC730278 (LOC730278), mRNA.                                            |
| NM_006182.2    | DDR2      | 6.197 | Homo sapiens discoidin domain receptor tyrosine kinase 2 (DDR2), transcript variant 2, mRNA.                 |
| NM_005797.2    | MPZL2     | 6.140 | Homo sapiens myelin protein zero-like 2 (MPZL2), transcript variant 1, mRNA.                                 |
| NM_005221.5    | DLX5      | 6.112 | Homo sapiens distal-less homeobox 5 (DLX5), mRNA.                                                            |
| NM_018584.5    | CAMK2N1   | 6.109 | Homo sapiens calcium/calmodulin-dependent protein kinase II inhibitor 1 (CAMK2N1), mRNA.                     |
| NM_016509.3    | CLEC1B    | 6.024 | Homo sapiens C-type lectin domain family 1, member B (CLEC1B), transcript variant 1, mRNA.                   |
| NM_006096.2    | NDRG1     | 5.992 | Homo sapiens N-myc downstream regulated gene 1 (NDRG1), mRNA.                                                |
| NM_002982.3    | CCL2      | 5.970 | Homo sapiens chemokine (C-C motif) ligand 2 (CCL2), mRNA.                                                    |
| NM_006283.1    | TACC1     | 5.970 | Homo sapiens transforming, acidic coiled-coil containing protein 1 (TACC1), mRNA.                            |
| NM_004878.3    | PTGES     | 5.943 | Homo sapiens prostaglandin E synthase (PTGES), mRNA.                                                         |
| NM_001717.2    | BNC1      | 5.916 | Homo sapiens basonuclein 1 (BNC1), mRNA.                                                                     |
| NM_000099.2    | CST3      | 5.901 | Homo sapiens cystatin C (CST3), mRNA.                                                                        |
| NM_014585.4    | SLC40A1   | 5.890 | Homo sapiens solute carrier family 40 (iron-regulated transporter), member 1 (SLC40A1), mRNA.                |
| NM_002048.1    | GAS1      | 5.888 | Homo sapiens growth arrest-specific 1 (GAS1), mRNA.                                                          |
| NM_182827.1    | FKBP9L    | 5.880 | Homo sapiens FK506 binding protein 9-like (FKBP9L), mRNA.                                                    |
| NM_014624.3    | S100A6    | 5.870 | Homo sapiens S100 calcium binding protein A6 (S100A6), mRNA.                                                 |
| NM_000943.4    | PPIC      | 5.820 | Homo sapiens peptidylprolyl isomerase C (cyclophilin C) (PPIC), mRNA.                                        |
| NM_021005.2    | NR2F2     | 5.807 | Homo sapiens nuclear receptor subfamily 2, group F, member 2 (NR2F2), mRNA.                                  |
| NM_001451.2    | FOXF1     | 5.807 | Homo sapiens forkhead box F1 (FOXF1), mRNA.                                                                  |
| NM_145056.1    | DACT3     | 5.793 | Homo sapiens dapper, antagonist of beta-catenin, homolog 3 (Xenopus laevis) (DACT3), mRNA.                   |
| NM_006487.2    | FBLN1     | 5.791 | Homo sapiens fibulin 1 (FBLN1), transcript variant A, mRNA.                                                  |
| NM_002414.3    | CD99      | 5.773 | Homo sapiens CD99 molecule (CD99), transcript variant 1, mRNA.                                               |
| NM_002380.3    | MATN2     | 5.716 | Homo sapiens matrilin 2 (MATN2), transcript variant 1, mRNA.                                                 |
| NM_004936.3    | CDKN2B    | 5.677 | Homo sapiens cyclin-dependent kinase inhibitor 2B (p15, inhibits CDK4) (CDKN2B), transcript variant 1, mRNA. |
| NM_001854.3    | COL11A1   | 5.661 | Homo sapiens collagen, type XI, alpha 1 (COL11A1), transcript variant A, mRNA.                               |
| NM_000325.5    | PITX2     | 5.660 | Homo sapiens paired-like homeodomain 2 (PITX2), transcript variant 3, mRNA.                                  |
| NM_001629.2    | ALOX5AP   | 5.660 | Homo sapiens arachidonate 5-lipoxygenase-activating protein                                                  |

|                |          |       |                                                                                                                                       |
|----------------|----------|-------|---------------------------------------------------------------------------------------------------------------------------------------|
|                |          |       | (ALOX5AP), mRNA.                                                                                                                      |
| NM_018012.2    | KIF26B   | 5.645 | Homo sapiens kinesin family member 26B (KIF26B), mRNA.                                                                                |
| NM_002191.2    | INHHA    | 5.613 | Homo sapiens inhibin, alpha (INHHA), mRNA.                                                                                            |
| NM_199355.2    | ADAMTS18 | 5.604 | Homo sapiens ADAM metalloproteinase with thrombospondin type 1 motif, 18 (ADAMTS18), mRNA.                                            |
| NM_006751.4    | SSFA2    | 5.598 | Homo sapiens sperm specific antigen 2 (SSFA2), mRNA.                                                                                  |
| NM_032199.1    | ARID5B   | 5.588 | Homo sapiens AT rich interactive domain 5B (MRF1-like) (ARID5B), mRNA.                                                                |
| NM_001134.1    | AFP      | 5.576 | Homo sapiens alpha-fetoprotein (AFP), mRNA.                                                                                           |
| NM_001717.2    | BNC1     | 5.575 | Homo sapiens basonuclin 1 (BNC1), mRNA.                                                                                               |
| NM_018712.2    | ELMOD1   | 5.572 | Homo sapiens ELMO/CED-12 domain containing 1 (ELMOD1), mRNA.                                                                          |
| NM_000888.3    | ITGB6    | 5.556 | Homo sapiens integrin, beta 6 (ITGB6), mRNA.                                                                                          |
| NM_006255.3    | PRKCH    | 5.495 | Homo sapiens protein kinase C, eta (PRKCH), mRNA.                                                                                     |
| NM_014900.3    | COBLL1   | 5.469 | Homo sapiens COBL-like 1 (COBLL1), mRNA.                                                                                              |
| NM_006307.3    | SRPX     | 5.463 | Homo sapiens sushi-repeat-containing protein, X-linked (SRPX), mRNA.                                                                  |
| NM_014795.2    | ZEB2     | 5.462 | Homo sapiens zinc finger E-box binding homeobox 2 (ZEB2), mRNA.                                                                       |
| NM_019555.1    | ARHGEF3  | 5.459 | Homo sapiens Rho guanine nucleotide exchange factor (GEF) 3 (ARHGEF3), mRNA.                                                          |
| NM_005620.1    | S100A11  | 5.451 | Homo sapiens S100 calcium binding protein A11 (S100A11), mRNA.                                                                        |
| NM_147780.2    | CTSB     | 5.428 | Homo sapiens cathepsin B (CTSB), transcript variant 2, mRNA.                                                                          |
| NM_000477.3    | ALB      | 5.425 | Homo sapiens albumin (ALB), mRNA.                                                                                                     |
| NM_001024912.1 | CEACAM1  | 5.415 | Homo sapiens carcinoembryonic antigen-related cell adhesion molecule 1 (biliary glycoprotein) (CEACAM1), transcript variant 2, mRNA.  |
| NM_015130.2    | TBC1D9   | 5.391 | Homo sapiens TBC1 domain family, member 9 (with GRAM domain) (TBC1D9), mRNA.                                                          |
| NM_001684.3    | ATP2B4   | 5.365 | Homo sapiens ATPase, Ca <sup>++</sup> transporting, plasma membrane 4 (ATP2B4), transcript variant 2, mRNA.                           |
| NM_005429.2    | VEGFC    | 5.364 | Homo sapiens vascular endothelial growth factor C (VEGFC), mRNA.                                                                      |
| NM_212474.1    | FN1      | 5.348 | Homo sapiens fibronectin 1 (FN1), transcript variant 6, mRNA.                                                                         |
| NM_016657.1    | KDEL3    | 5.338 | Homo sapiens KDEL (Lys-Asp-Glu-Leu) endoplasmic reticulum protein retention receptor 3 (KDEL3), transcript variant 2, mRNA.           |
| NM_002247.2    | KCNMA1   | 5.330 | Homo sapiens potassium large conductance calcium-activated channel, subfamily M, alpha member 1 (KCNMA1), transcript variant 2, mRNA. |
| NM_016174.3    | CERCAM   | 5.310 | Homo sapiens cerebral endothelial cell adhesion molecule (CERCAM), mRNA.                                                              |
| NM_030665.3    | RAI1     | 5.307 | Homo sapiens retinoic acid induced 1 (RAI1), mRNA.                                                                                    |
| NM_006855.2    | KDEL3    | 5.262 | Homo sapiens KDEL (Lys-Asp-Glu-Leu) endoplasmic reticulum protein retention receptor 3 (KDEL3), transcript variant 1, mRNA.           |
| NM_006902.3    | PRRX1    | 5.260 | Homo sapiens paired related homeobox 1 (PRRX1), transcript variant pmx-1a, mRNA.                                                      |
| NM_014391.2    | ANKRD1   | 5.241 | Homo sapiens ankyrin repeat domain 1 (cardiac muscle) (ANKRD1), mRNA.                                                                 |
| NM_003613.2    | CILP     | 5.231 | Homo sapiens cartilage intermediate layer protein, nucleotide pyrophosphohydrolase (CILP), mRNA.                                      |
| NM_005996.3    | TBX3     | 5.220 | Homo sapiens T-box 3 (TBX3), transcript variant 1, mRNA.                                                                              |
| NM_022872.2    | IFI6     | 5.207 | Homo sapiens interferon, alpha-inducible protein 6 (IFI6), transcript variant 2, mRNA.                                                |
| NM_001033047.1 | NPNT     | 5.184 | Homo sapiens nephronectin (NPNT), mRNA.                                                                                               |

|                |           |       |                                                                                                                                   |
|----------------|-----------|-------|-----------------------------------------------------------------------------------------------------------------------------------|
| NM_005786.4    | TSHZ1     | 5.179 | Homo sapiens teashirt zinc finger homeobox 1 (TSHZ1), mRNA.                                                                       |
| NM_001001396.1 | ATP2B4    | 5.177 | Homo sapiens ATPase, Ca++ transporting, plasma membrane 4 (ATP2B4), transcript variant 1, mRNA.                                   |
| NM_003714.2    | STC2      | 5.175 | Homo sapiens stanniocalcin 2 (STC2), mRNA.                                                                                        |
| NM_014459.2    | PCDH17    | 5.144 | Homo sapiens protocadherin 17 (PCDH17), mRNA.                                                                                     |
| NM_024336.1    | IRX3      | 5.142 | Homo sapiens iroquois homeobox 3 (IRX3), mRNA.                                                                                    |
| NM_002276.3    | KRT19     | 5.138 | Homo sapiens keratin 19 (KRT19), mRNA.                                                                                            |
| NM_001996.2    | FBLN1     | 5.130 | Homo sapiens fibulin 1 (FBLN1), transcript variant C, mRNA.                                                                       |
| NM_001842.3    | CNTFR     | 5.124 | Homo sapiens ciliary neurotrophic factor receptor (CNTFR), transcript variant 2, mRNA.                                            |
| NM_080473.3    | GATA5     | 5.121 | Homo sapiens GATA binding protein 5 (GATA5), mRNA.                                                                                |
| NM_002521.2    | NPPB      | 5.113 | Homo sapiens natriuretic peptide precursor B (NPPB), mRNA.                                                                        |
| NM_003380.2    | VIM       | 5.084 | Homo sapiens vimentin (VIM), mRNA.                                                                                                |
| NM_002845.2    | PTPRM     | 5.073 | Homo sapiens protein tyrosine phosphatase, receptor type, M (PTPRM), mRNA.                                                        |
| NM_004864.1    | GDF15     | 5.070 | Homo sapiens growth differentiation factor 15 (GDF15), mRNA.                                                                      |
| NM_001032281.2 | TFPI      | 5.070 | Homo sapiens tissue factor pathway inhibitor (lipoprotein-associated coagulation inhibitor) (TFPI), transcript variant 2, mRNA.   |
| NM_024430.2    | PSTPIP2   | 5.067 | Homo sapiens proline-serine-threonine phosphatase interacting protein 2 (PSTPIP2), mRNA.                                          |
| NM_001001431.1 | TNNT2     | 5.064 | Homo sapiens troponin T type 2 (cardiac) (TNNT2), transcript variant 3, mRNA.                                                     |
| NM_197941.2    | ADAMTS6   | 5.064 | Homo sapiens ADAM metalloproteinase with thrombospondin type 1 motif, 6 (ADAMTS6), mRNA.                                          |
| NM_182909.2    | FILIP1L   | 5.058 | Homo sapiens filamin A interacting protein 1-like (FILIP1L), transcript variant 1, mRNA.                                          |
| NM_004093.2    | EFNB2     | 5.056 | Homo sapiens ephrin-B2 (EFNB2), mRNA.                                                                                             |
| XM_001133042.1 | PDZRN3    | 5.055 | PREDICTED: Homo sapiens PDZ domain containing RING finger 3 (PDZRN3), mRNA.                                                       |
| NM_134268.3    | CYGB      | 5.015 | Homo sapiens cytoglobin (CYGB), mRNA.                                                                                             |
| NM_031479.3    | INHBE     | 5.007 | Homo sapiens inhibin, beta E (INHBE), mRNA.                                                                                       |
| XR_017543.1    | LOC400578 | 4.999 | PREDICTED: Homo sapiens similar to Keratin, type I cytoskeletal 14 (Cytokeratin-14) (CK-14) (Keratin-14) (K14) (LOC400578), mRNA. |
| NM_144766.1    | RGS13     | 4.974 | Homo sapiens regulator of G-protein signaling 13 (RGS13), transcript variant 2, mRNA.                                             |
| NM_000735.2    | CGA       | 4.965 | Homo sapiens glycoprotein hormones, alpha polypeptide (CGA), mRNA.                                                                |
| NM_153362.1    | PRSS35    | 4.959 | Homo sapiens protease, serine, 35 (PRSS35), mRNA.                                                                                 |
| NM_000104.2    | CYP1B1    | 4.952 | Homo sapiens cytochrome P450, family 1, subfamily B, polypeptide 1 (CYP1B1), mRNA.                                                |
| AK095831       |           | 4.952 | Homo sapiens cDNA FLJ38512 fis, clone HCHON2000503                                                                                |
| NM_002205.2    | ITGA5     | 4.935 | Homo sapiens integrin, alpha 5 (fibronectin receptor, alpha polypeptide) (ITGA5), mRNA.                                           |
| NM_014365.2    | HSPB8     | 4.925 | Homo sapiens heat shock 22kDa protein 8 (HSPB8), mRNA.                                                                            |
| NM_006403.2    | NEDD9     | 4.918 | Homo sapiens neural precursor cell expressed, developmentally down-regulated 9 (NEDD9), transcript variant 1, mRNA.               |
| NM_006983.1    | MMP23B    | 4.912 | Homo sapiens matrix metalloproteinase 23B (MMP23B), mRNA.                                                                         |
| NM_018469.3    | TEX2      | 4.902 | Homo sapiens testis expressed 2 (TEX2), mRNA.                                                                                     |
| NM_020962.1    | IGDCC4    | 4.865 | Homo sapiens immunoglobulin superfamily, DCC subclass, member 4 (IGDCC4), mRNA.                                                   |
| NM_006129.2    | BMP1      | 4.862 | Homo sapiens bone morphogenetic protein 1 (BMP1), transcript variant BMP1-3, mRNA.                                                |
| NM_172112.1    | EYA2      | 4.857 | Homo sapiens eyes absent homolog 2 (Drosophila) (EYA2), transcript variant 4, mRNA.                                               |
| NM_001042459.1 | FILIP1L   | 4.846 | Homo sapiens filamin A interacting protein 1-like (FILIP1L),                                                                      |



|                |          |       |                                                                                                                                          |
|----------------|----------|-------|------------------------------------------------------------------------------------------------------------------------------------------|
|                |          |       | transcript variant 3, mRNA.                                                                                                              |
| NM_201433.1    | GAS7     | 4.831 | Homo sapiens growth arrest-specific 7 (GAS7), transcript variant c, mRNA.                                                                |
| NM_005114.2    | HS3ST1   | 4.816 | Homo sapiens heparan sulfate (glucosamine) 3-O-sulfotransferase 1 (HS3ST1), mRNA.                                                        |
| NM_004530.2    | MMP2     | 4.800 | Homo sapiens matrix metalloproteinase 2 (gelatinase A, 72kDa gelatinase, 72kDa type IV collagenase) (MMP2), mRNA.                        |
| NM_001998.2    | FBLN2    | 4.783 | Homo sapiens fibulin 2 (FBLN2), transcript variant 2, mRNA.                                                                              |
| NM_152611.3    | LRRN4    | 4.781 | Homo sapiens leucine rich repeat neuronal 4 (LRRN4), mRNA.                                                                               |
| NM_182487.2    | OLFML2A  | 4.760 | Homo sapiens olfactomedin-like 2A (OLFML2A), mRNA.                                                                                       |
| NM_003469.3    | SCG2     | 4.748 | Homo sapiens secretogranin II (chromogranin C) (SCG2), mRNA.                                                                             |
| NM_001006666.1 | APOBEC3F | 4.745 | Homo sapiens apolipoprotein B mRNA editing enzyme, catalytic polypeptide-like 3F (APOBEC3F), transcript variant 2, mRNA.                 |
| NM_005576.2    | LOXL1    | 4.732 | Homo sapiens lysyl oxidase-like 1 (LOXL1), mRNA.                                                                                         |
| NM_004411.3    | DYNC1I1  | 4.720 | Homo sapiens dynein, cytoplasmic 1, intermediate chain 1 (DYNC1I1), mRNA.                                                                |
| NM_006203.3    | PDE4D    | 4.720 | Homo sapiens phosphodiesterase 4D, cAMP-specific (phosphodiesterase E3 dunce homolog, Drosophila) (PDE4D), mRNA.                         |
| NM_003380.2    | VIM      | 4.710 | Homo sapiens vimentin (VIM), mRNA.                                                                                                       |
| NM_025179.3    | PLXNA2   | 4.693 | Homo sapiens plexin A2 (PLXNA2), mRNA.                                                                                                   |
| NM_003982.2    | SLC7A7   | 4.690 | Homo sapiens solute carrier family 7 (cationic amino acid transporter, y+ system), member 7 (SLC7A7), mRNA.                              |
| NM_007112.3    | THBS3    | 4.654 | Homo sapiens thrombospondin 3 (THBS3), mRNA.                                                                                             |
| NM_002543.3    | OLR1     | 4.647 | Homo sapiens oxidized low density lipoprotein (lectin-like) receptor 1 (OLR1), mRNA.                                                     |
| NR_001562.1    | ANXA2P1  | 4.638 | Homo sapiens annexin A2 pseudogene 1 (ANXA2P1) on chromosome 4.                                                                          |
| NM_003033.2    | ST3GAL1  | 4.637 | Homo sapiens ST3 beta-galactoside alpha-2,3-sialyltransferase 1 (ST3GAL1), transcript variant 1, mRNA.                                   |
| NM_020808.3    | SIPA1L2  | 4.635 | Homo sapiens signal-induced proliferation-associated 1 like 2 (SIPA1L2), mRNA.                                                           |
| NM_001846.2    | COL4A2   | 4.628 | Homo sapiens collagen, type IV, alpha 2 (COL4A2), mRNA.                                                                                  |
| NM_000878.2    | IL2RB    | 4.613 | Homo sapiens interleukin 2 receptor, beta (IL2RB), mRNA.                                                                                 |
| NM_003882.2    | WISP1    | 4.609 | Homo sapiens WNT1 inducible signaling pathway protein 1 (WISP1), transcript variant 1, mRNA.                                             |
| NM_004884.3    | IGDCC3   | 4.605 | Homo sapiens immunoglobulin superfamily, DCC subclass, member 3 (IGDCC3), mRNA.                                                          |
| NM_006270.3    | RRAS     | 4.598 | Homo sapiens related RAS viral (r-ras) oncogene homolog (RRAS), mRNA.                                                                    |
| NM_004154.3    | P2RY6    | 4.591 | Homo sapiens pyrimidinergic receptor P2Y, G-protein coupled, 6 (P2RY6), transcript variant 4, mRNA.                                      |
| NM_003238.1    | TGFB2    | 4.573 | Homo sapiens transforming growth factor, beta 2 (TGFB2), mRNA.                                                                           |
| NM_207361.4    | FREM2    | 4.572 | Homo sapiens FRAS1 related extracellular matrix protein 2 (FREM2), mRNA.                                                                 |
| NM_032918.1    | RERG     | 4.550 | Homo sapiens RAS-like, estrogen-regulated, growth inhibitor (RERG), mRNA.                                                                |
| NM_002966.1    | S100A10  | 4.540 | Homo sapiens S100 calcium binding protein A10 (annexin II ligand, calpactin I, light polypeptide (p11)) (S100A10), mRNA.                 |
| NM_001458.3    | FLNC     | 4.523 | Homo sapiens filamin C, gamma (actin binding protein 280) (FLNC), mRNA.                                                                  |
| NM_001002236.1 | SERPINA1 | 4.523 | Homo sapiens serpin peptidase inhibitor, clade A (alpha-1 antiproteinase, antitrypsin), member 1 (SERPINA1), transcript variant 2, mRNA. |
| NM_002380.3    | MATN2    | 4.513 | Homo sapiens matrilin 2 (MATN2), transcript variant 1, mRNA.                                                                             |
| NM_001040619.1 | ATF3     | 4.506 | Homo sapiens activating transcription factor 3 (ATF3), transcript                                                                        |

|                |          |       |                                                                                                                                   |
|----------------|----------|-------|-----------------------------------------------------------------------------------------------------------------------------------|
|                |          |       | variant 4, mRNA.                                                                                                                  |
| NM_198252.2    | GSN      | 4.495 | Homo sapiens gelsolin (amyloidosis, Finnish type) (GSN), transcript variant 2, mRNA.                                              |
| NM_052966.2    | FAM129A  | 4.466 | Homo sapiens family with sequence similarity 129, member A (FAM129A), transcript variant 2, mRNA.                                 |
| NM_022369.2    | STRA6    | 4.454 | Homo sapiens stimulated by retinoic acid gene 6 homolog (mouse) (STRA6), mRNA.                                                    |
| NM_015529.2    | MOXD1    | 4.450 | Homo sapiens monooxygenase, DBH-like 1 (MOXD1), transcript variant 2, mRNA.                                                       |
| NM_175873.4    | ANKRD43  | 4.445 | Homo sapiens ankyrin repeat domain 43 (ANKRD43), mRNA.                                                                            |
| NM_030672.2    | ARHGAP28 | 4.432 | Homo sapiens Rho GTPase activating protein 28 (ARHGAP28), transcript variant 2, mRNA.                                             |
| NM_015691.2    | WWC3     | 4.408 | Homo sapiens WWC family member 3 (WWC3), mRNA.                                                                                    |
| NM_013279.1    | C11orf9  | 4.399 | Homo sapiens chromosome 11 open reading frame 9 (C11orf9), transcript variant 1, mRNA.                                            |
| NM_005907.2    | MAN1A1   | 4.398 | Homo sapiens mannosidase, alpha, class 1A, member 1 (MAN1A1), mRNA.                                                               |
| NM_133367.3    | PAQR8    | 4.394 | Homo sapiens progesterin and adipoQ receptor family member VIII (PAQR8), mRNA.                                                    |
| NM_144729.1    | DUSP10   | 4.393 | Homo sapiens dual specificity phosphatase 10 (DUSP10), transcript variant 3, mRNA.                                                |
| NM_006290.2    | TNFAIP3  | 4.387 | Homo sapiens tumor necrosis factor, alpha-induced protein 3 (TNFAIP3), mRNA.                                                      |
| NM_000784.2    | CYP27A1  | 4.386 | Homo sapiens cytochrome P450, family 27, subfamily A, polypeptide 1 (CYP27A1), nuclear gene encoding mitochondrial protein, mRNA. |
| NM_016205.1    | PDGFC    | 4.378 | Homo sapiens platelet derived growth factor C (PDGFC), mRNA.                                                                      |
| NM_006851.2    | GLIPR1   | 4.377 | Homo sapiens GLI pathogenesis-related 1 (GLIPR1), mRNA.                                                                           |
| NM_001423.1    | EMP1     | 4.374 | Homo sapiens epithelial membrane protein 1 (EMP1), mRNA.                                                                          |
| NM_005318.2    | H1FO     | 4.370 | Homo sapiens H1 histone family, member 0 (H1FO), mRNA.                                                                            |
| NM_177964.3    | LYPD6B   | 4.362 | Homo sapiens LY6/PLAUR domain containing 6B (LYPD6B), mRNA.                                                                       |
| BX537506       |          | 4.360 | Homo sapiens mRNA; cDNA DKFZp779K2051 (from clone DKFZp779K2051)                                                                  |
| NM_002966.2    | S100A10  | 4.346 | Homo sapiens S100 calcium binding protein A10 (S100A10), mRNA.                                                                    |
| NM_015170.1    | SULF1    | 4.338 | Homo sapiens sulfatase 1 (SULF1), mRNA.                                                                                           |
| NM_005562.1    | LAMC2    | 4.328 | Homo sapiens laminin, gamma 2 (LAMC2), transcript variant 1, mRNA.                                                                |
| NM_001463.2    | FRZB     | 4.327 | Homo sapiens frizzled-related protein (FRZB), mRNA.                                                                               |
| NM_001548.3    | IFIT1    | 4.321 | Homo sapiens interferon-induced protein with tetratricopeptide repeats 1 (IFIT1), transcript variant 2, mRNA.                     |
| NM_014583.2    | LMCD1    | 4.312 | Homo sapiens LIM and cysteine-rich domains 1 (LMCD1), mRNA.                                                                       |
| NM_198392.1    | TCF21    | 4.307 | Homo sapiens transcription factor 21 (TCF21), transcript variant 1, mRNA.                                                         |
| NM_014333.3    | CADM1    | 4.299 | Homo sapiens cell adhesion molecule 1 (CADM1), transcript variant 1, mRNA.                                                        |
| NM_001998.2    | FBLN2    | 4.293 | Homo sapiens fibulin 2 (FBLN2), transcript variant 2, mRNA.                                                                       |
| NM_015206.1    | KIAA1024 | 4.288 | Homo sapiens KIAA1024 (KIAA1024), mRNA.                                                                                           |
| NM_173848.5    | RALYL    | 4.276 | Homo sapiens RALY RNA binding protein-like (RALYL), transcript variant 3, mRNA.                                                   |
| NM_178565.3    | RSPO2    | 4.271 | Homo sapiens R-spondin 2 homolog (Xenopus laevis) (RSPO2), mRNA.                                                                  |
| NM_001040626.1 | NCALD    | 4.265 | Homo sapiens neurocalcin delta (NCALD), transcript variant 3, mRNA.                                                               |
| NM_006475.1    | POSTN    | 4.260 | Homo sapiens periostin, osteoblast specific factor (POSTN), mRNA.                                                                 |
| NM_000689.3    | ALDH1A1  | 4.259 | Homo sapiens aldehyde dehydrogenase 1 family, member A1                                                                           |

|                |           |       |                                                                                                                                                     |
|----------------|-----------|-------|-----------------------------------------------------------------------------------------------------------------------------------------------------|
|                |           |       | (ALDH1A1), mRNA.                                                                                                                                    |
| NM_014935.2    | PLEKHA6   | 4.259 | Homo sapiens pleckstrin homology domain containing, family A member 6 (PLEKHA6), mRNA.                                                              |
| NM_003181.2    | T         | 4.255 | Homo sapiens T, brachyury homolog (mouse) (T), mRNA.                                                                                                |
| NM_003275.2    | TMOD1     | 4.246 | Homo sapiens tropomodulin 1 (TMOD1), mRNA.                                                                                                          |
| NM_000163.2    | GHR       | 4.242 | Homo sapiens growth hormone receptor (GHR), mRNA.                                                                                                   |
| NM_021223.2    | MYL7      | 4.220 | Homo sapiens myosin, light chain 7, regulatory (MYL7), mRNA.                                                                                        |
| XR_015970.1    | MGC102966 | 4.214 | PREDICTED: Homo sapiens similar to Keratin, type I cytoskeletal 16 (Cytokeratin-16) (CK-16) (Keratin-16) (K16) (MGC102966), misc RNA.               |
| NM_080805.2    | COL13A1   | 4.213 | Homo sapiens collagen, type XIII, alpha 1 (COL13A1), transcript variant 9, mRNA.                                                                    |
| NM_005228.3    | EGFR      | 4.208 | Homo sapiens epidermal growth factor receptor (erythroblastic leukemia viral (v-erb-b) oncogene homolog, avian) (EGFR), transcript variant 1, mRNA. |
| NM_003633.1    | ENC1      | 4.208 | Homo sapiens ectodermal-neural cortex (with BTB-like domain) (ENC1), mRNA.                                                                          |
| NM_000300.2    | PLA2G2A   | 4.201 | Homo sapiens phospholipase A2, group IIA (platelets, synovial fluid) (PLA2G2A), mRNA.                                                               |
| NM_022055.1    | KCNK12    | 4.187 | Homo sapiens potassium channel, subfamily K, member 12 (KCNK12), mRNA.                                                                              |
| NM_172313.1    | CSF3R     | 4.184 | Homo sapiens colony stimulating factor 3 receptor (granulocyte) (CSF3R), transcript variant 4, mRNA.                                                |
| NM_007088.2    | CALB2     | 4.167 | Homo sapiens calbindin 2 (CALB2), transcript variant CALB2c, mRNA.                                                                                  |
| NM_080826.1    | ISM1      | 4.141 | Homo sapiens isthmin 1 homolog (zebrafish) (ISM1), mRNA.                                                                                            |
| NM_001005340.1 | GPNMB     | 4.139 | Homo sapiens glycoprotein (transmembrane) nmb (GPNMB), transcript variant 1, mRNA.                                                                  |
| XM_931359.2    | LOC338758 | 4.137 | PREDICTED: Homo sapiens hypothetical protein LOC338758 (LOC338758), mRNA.                                                                           |
| NM_024928.3    | OBFC1     | 4.127 | Homo sapiens oligonucleotide/oligosaccharide-binding fold containing 1 (OBFC1), mRNA.                                                               |
| NM_004364.2    | CEBPA     | 4.124 | Homo sapiens CCAAT/enhancer binding protein (C/EBP), alpha (CEBPA), mRNA.                                                                           |
| NM_003937.2    | KYNU      | 4.115 | Homo sapiens kynureninase (L-kynurenine hydrolase) (KYNU), transcript variant 1, mRNA.                                                              |
| NM_005654.4    | NR2F1     | 4.094 | Homo sapiens nuclear receptor subfamily 2, group F, member 1 (NR2F1), mRNA.                                                                         |
| NM_181873.2    | MTMR11    | 4.080 | Homo sapiens myotubularin related protein 11 (MTMR11), mRNA.                                                                                        |
| NM_006528.2    | TFPI2     | 4.079 | Homo sapiens tissue factor pathway inhibitor 2 (TFPI2), mRNA.                                                                                       |
| NM_005605.3    | PPP3CC    | 4.078 | Homo sapiens protein phosphatase 3 (formerly 2B), catalytic subunit, gamma isoform (PPP3CC), mRNA.                                                  |
| NM_021973.2    | HAND2     | 4.066 | Homo sapiens heart and neural crest derivatives expressed 2 (HAND2), mRNA.                                                                          |
| NM_198098.1    | AQP1      | 4.053 | Homo sapiens aquaporin 1 (Colton blood group) (AQP1), mRNA.                                                                                         |
| NM_001630.2    | ANXA8L2   | 4.041 | Homo sapiens annexin A8-like 2 (ANXA8L2), mRNA.                                                                                                     |
| NM_052941.3    | GBP4      | 4.038 | Homo sapiens guanylate binding protein 4 (GBP4), mRNA.                                                                                              |
| NM_033504.2    | TMEM54    | 4.037 | Homo sapiens transmembrane protein 54 (TMEM54), mRNA.                                                                                               |
| NM_000404.1    | GLB1      | 4.036 | Homo sapiens galactosidase, beta 1 (GLB1), transcript variant 179423, mRNA.                                                                         |
| NM_014631.2    | SH3PXD2A  | 4.003 | Homo sapiens SH3 and PX domains 2A (SH3PXD2A), mRNA.                                                                                                |
| NM_002402.2    | MEST      | 3.985 | Homo sapiens mesoderm specific transcript homolog (mouse) (MEST), transcript variant 1, mRNA.                                                       |
| NM_003335.2    | UBA7      | 3.984 | Homo sapiens ubiquitin-like modifier activating enzyme 7 (UBA7), mRNA.                                                                              |
| NM_203370.1    | C3orf54   | 3.983 | Homo sapiens chromosome 3 open reading frame 54 (C3orf54),                                                                                          |

|                |          |       |                                                                                                                  |
|----------------|----------|-------|------------------------------------------------------------------------------------------------------------------|
|                |          |       | mRNA.                                                                                                            |
| NM_001036.2    | RYR3     | 3.982 | Homo sapiens ryanodine receptor 3 (RYR3), mRNA.                                                                  |
| NM_033380.1    | COL4A5   | 3.976 | Homo sapiens collagen, type IV, alpha 5 (COL4A5), transcript variant 2, mRNA.                                    |
| NM_004525.2    | LRP2     | 3.957 | Homo sapiens low density lipoprotein-related protein 2 (LRP2), mRNA.                                             |
| NM_006834.2    | RAB32    | 3.953 | Homo sapiens RAB32, member RAS oncogene family (RAB32), mRNA.                                                    |
| NM_033119.3    | NKD1     | 3.943 | Homo sapiens naked cuticle homolog 1 (Drosophila) (NKD1), mRNA.                                                  |
| NM_004884.3    | IGDCC3   | 3.939 | Homo sapiens immunoglobulin superfamily, DCC subclass, member 3 (IGDCC3), mRNA.                                  |
| NM_139314.1    | ANGPTL4  | 3.935 | Homo sapiens angiopoietin-like 4 (ANGPTL4), transcript variant 1, mRNA.                                          |
| NM_014322.2    | OPN3     | 3.935 | Homo sapiens opsin 3 (OPN3), mRNA.                                                                               |
| NM_000494.3    | COL17A1  | 3.929 | Homo sapiens collagen, type XVII, alpha 1 (COL17A1), mRNA.                                                       |
| NM_002273.2    | KRT8     | 3.925 | Homo sapiens keratin 8 (KRT8), mRNA.                                                                             |
| NM_001002858.1 | ANXA2    | 3.920 | Homo sapiens annexin A2 (ANXA2), transcript variant 1, mRNA.                                                     |
| NM_022059.1    | CXCL16   | 3.909 | Homo sapiens chemokine (C-X-C motif) ligand 16 (CXCL16), mRNA.                                                   |
| NM_024690.2    | MUC16    | 3.905 | Homo sapiens mucin 16, cell surface associated (MUC16), mRNA.                                                    |
| AF131784       |          | 3.899 | Homo sapiens clone 25194 mRNA sequence                                                                           |
| NM_001908.3    | CTSB     | 3.882 | Homo sapiens cathepsin B (CTSB), transcript variant 1, mRNA.                                                     |
| NM_005908.3    | MANBA    | 3.877 | Homo sapiens mannosidase, beta A, lysosomal (MANBA), mRNA.                                                       |
| NM_080629.2    | COL11A1  | 3.876 | Homo sapiens collagen, type XI, alpha 1 (COL11A1), transcript variant B, mRNA.                                   |
| NM_152680.1    | TMEM154  | 3.853 | Homo sapiens transmembrane protein 154 (TMEM154), mRNA.                                                          |
| NM_001849.3    | COL6A2   | 3.848 | Homo sapiens collagen, type VI, alpha 2 (COL6A2), transcript variant 2C2, mRNA.                                  |
| NM_022138.1    | SMOC2    | 3.847 | Homo sapiens SPARC related modular calcium binding 2 (SMOC2), mRNA.                                              |
| NM_005097.1    | LGI1     | 3.839 | Homo sapiens leucine-rich, glioma inactivated 1 (LGI1), mRNA.                                                    |
| NM_002306.1    | LGALS3   | 3.837 | Homo sapiens lectin, galactoside-binding, soluble, 3 (galectin 3) (LGALS3), mRNA.                                |
| NM_080388.1    | S100A16  | 3.830 | Homo sapiens S100 calcium binding protein A16 (S100A16), mRNA.                                                   |
| NM_004789.3    | LHX2     | 3.829 | Homo sapiens LIM homeobox 2 (LHX2), mRNA.                                                                        |
| NM_001425.1    | EMP3     | 3.825 | Homo sapiens epithelial membrane protein 3 (EMP3), mRNA.                                                         |
| NM_002291.1    | LAMB1    | 3.825 | Homo sapiens laminin, beta 1 (LAMB1), mRNA.                                                                      |
| NM_001147.1    | ANGPT2   | 3.810 | Homo sapiens angiopoietin 2 (ANGPT2), mRNA.                                                                      |
| NM_024841.3    | FLJ14213 | 3.799 | Homo sapiens protor-2 (FLJ14213), mRNA.                                                                          |
| NM_030665.3    | RAI1     | 3.779 | Homo sapiens retinoic acid induced 1 (RAI1), mRNA.                                                               |
| NM_005460.2    | SNCAIP   | 3.771 | Homo sapiens synuclein, alpha interacting protein (SNCAIP), mRNA.                                                |
| NM_000891.2    | KCNJ2    | 3.770 | Homo sapiens potassium inwardly-rectifying channel, subfamily J, member 2 (KCNJ2), mRNA.                         |
| NM_001006932.1 | RPS6KA2  | 3.769 | Homo sapiens ribosomal protein S6 kinase, 90kDa, polypeptide 2 (RPS6KA2), transcript variant 2, mRNA.            |
| NM_001079811.1 | GLB1     | 3.762 | Homo sapiens galactosidase, beta 1 (GLB1), transcript variant 2, mRNA.                                           |
| NM_001233.3    | CAV2     | 3.760 | Homo sapiens caveolin 2 (CAV2), transcript variant 1, mRNA.                                                      |
| NM_138389.1    | FAM114A1 | 3.756 | Homo sapiens family with sequence similarity 114, member A1 (FAM114A1), mRNA.                                    |
| NM_016651.5    | DACT1    | 3.754 | Homo sapiens dapper, antagonist of beta-catenin, homolog 1 (Xenopus laevis) (DACT1), transcript variant 1, mRNA. |
| NM_022062.2    | PKNOX2   | 3.751 | Homo sapiens PBX/knotted 1 homeobox 2 (PKNOX2), mRNA.                                                            |
| NM_032873.4    | UBASH3B  | 3.731 | Homo sapiens ubiquitin associated and SH3 domain containing, B                                                   |

|                |           |       |                                                                                                                                    |
|----------------|-----------|-------|------------------------------------------------------------------------------------------------------------------------------------|
|                |           |       | (UBASH3B), mRNA.                                                                                                                   |
| NM_001014447.1 | CPZ       | 3.730 | Homo sapiens carboxypeptidase Z (CPZ), transcript variant 1, mRNA.                                                                 |
| NM_001766.3    | CD1D      | 3.727 | Homo sapiens CD1d molecule (CD1D), mRNA.                                                                                           |
| XR_017100.2    | LOC149501 | 3.724 | PREDICTED: Homo sapiens misc_RNA (LOC149501), miscRNA.                                                                             |
| NM_001878.2    | CRABP2    | 3.724 | Homo sapiens cellular retinoic acid binding protein 2 (CRABP2), mRNA.                                                              |
| NM_177964.3    | LYPD6B    | 3.716 | Homo sapiens LY6/PLAUR domain containing 6B (LYPD6B), mRNA.                                                                        |
| NM_001343.2    | DAB2      | 3.710 | Homo sapiens disabled homolog 2, mitogen-responsive phosphoprotein ( <i>Drosophila</i> ) (DAB2), mRNA.                             |
| NM_000877.2    | IL1R1     | 3.709 | Homo sapiens interleukin 1 receptor, type I (IL1R1), mRNA.                                                                         |
| NM_005461.3    | MAFB      | 3.700 | Homo sapiens v-maf musculoaponeurotic fibrosarcoma oncogene homolog B (avian) (MAFB), mRNA.                                        |
| NM_006714.2    | SMPDL3A   | 3.700 | Homo sapiens sphingomyelin phosphodiesterase, acid-like 3A (SMPDL3A), mRNA.                                                        |
| NM_012071.2    | COMMD3    | 3.698 | Homo sapiens COMM domain containing 3 (COMMD3), mRNA.                                                                              |
| NM_178839.4    | LRRTM1    | 3.686 | Homo sapiens leucine rich repeat transmembrane neuronal 1 (LRRTM1), mRNA.                                                          |
| NM_005531.1    | IFI16     | 3.685 | Homo sapiens interferon, gamma-inducible protein 16 (IFI16), mRNA.                                                                 |
| NM_000862.2    | HSD3B1    | 3.680 | Homo sapiens hydroxy-delta-5-steroid dehydrogenase, 3 beta- and steroid delta-isomerase 1 (HSD3B1), mRNA.                          |
| NM_001873.1    | CPE       | 3.677 | Homo sapiens carboxypeptidase E (CPE), mRNA.                                                                                       |
| NM_033274.2    | ADAM19    | 3.674 | Homo sapiens ADAM metallopeptidase domain 19 (meltrin beta) (ADAM19), mRNA.                                                        |
| NM_005211.2    | CSF1R     | 3.673 | Homo sapiens colony stimulating factor 1 receptor, formerly McDonough feline sarcoma viral (v-fms) oncogene homolog (CSF1R), mRNA. |
| NM_012211.3    | ITGA11    | 3.670 | Homo sapiens integrin, alpha 11 (ITGA11), transcript variant 2, mRNA.                                                              |
| NM_006169.2    | NNMT      | 3.665 | Homo sapiens nicotinamide N-methyltransferase (NNMT), mRNA.                                                                        |
| NM_005226.2    | S1PR3     | 3.663 | Homo sapiens sphingosine-1-phosphate receptor 3 (S1PR3), mRNA.                                                                     |
| NM_000693.1    | ALDH1A3   | 3.661 | Homo sapiens aldehyde dehydrogenase 1 family, member A3 (ALDH1A3), mRNA.                                                           |
| NM_016815.2    | GYPC      | 3.658 | Homo sapiens glycophorin C (Gerbich blood group) (GYPC), transcript variant 2, mRNA.                                               |
| NM_198057.2    | TSC22D3   | 3.657 | Homo sapiens TSC22 domain family, member 3 (TSC22D3), transcript variant 1, mRNA.                                                  |
| NM_172037.2    | RDH10     | 3.655 | Homo sapiens retinol dehydrogenase 10 (all-trans) (RDH10), mRNA.                                                                   |
| NM_016081.3    | PALLD     | 3.651 | Homo sapiens palladin, cytoskeletal associated protein (PALLD), transcript variant 2, mRNA.                                        |
| NM_014988.1    | LIMCH1    | 3.647 | Homo sapiens LIM and calponin homology domains 1 (LIMCH1), mRNA.                                                                   |
| NM_001077269.1 | WIPF1     | 3.638 | Homo sapiens WAS/WASL interacting protein family, member 1 (WIPF1), transcript variant 2, mRNA.                                    |
| NM_182908.3    | DHRS2     | 3.630 | Homo sapiens dehydrogenase/reductase (SDR family) member 2 (DHRS2), transcript variant 1, mRNA.                                    |
| XM_927536.1    | ALDH1L2   | 3.621 | PREDICTED: Homo sapiens aldehyde dehydrogenase 1 family, member L2 (ALDH1L2), mRNA.                                                |
| NM_018440.3    | PAG1      | 3.620 | Homo sapiens phosphoprotein associated with glycosphingolipid microdomains 1 (PAG1), mRNA.                                         |
| NM_198501.1    | SMTNL2    | 3.619 | Homo sapiens smoothelin-like 2 (SMTNL2), mRNA.                                                                                     |
| NM_016446.2    | C9orf127  | 3.612 | Homo sapiens chromosome 9 open reading frame 127 (C9orf127), mRNA.                                                                 |
| NM_001034841.2 | ITPRIPL2  | 3.610 | Homo sapiens inositol 1,4,5-triphosphate receptor interacting                                                                      |

|                |           |       |                                                                                                                                                    |
|----------------|-----------|-------|----------------------------------------------------------------------------------------------------------------------------------------------------|
|                |           |       | protein-like 2 (ITPRIPL2), mRNA.                                                                                                                   |
| NM_014344.2    | FJX1      | 3.607 | Homo sapiens four jointed box 1 (Drosophila) (FJX1), mRNA.                                                                                         |
| NM_002781.2    | PSG5      | 3.605 | Homo sapiens pregnancy specific beta-1-glycoprotein 5 (PSG5), mRNA.                                                                                |
| NM_001848.2    | COL6A1    | 3.602 | Homo sapiens collagen, type VI, alpha 1 (COL6A1), mRNA.                                                                                            |
| NM_002780.3    | PSG4      | 3.602 | Homo sapiens pregnancy specific beta-1-glycoprotein 4 (PSG4), transcript variant 1, mRNA.                                                          |
| NM_000917.2    | P4HA1     | 3.600 | Homo sapiens procollagen-proline, 2-oxoglutarate 4-dioxygenase (proline 4-hydroxylase), alpha polypeptide I (P4HA1), transcript variant 1, mRNA.   |
| NM_173624.1    | FLJ40504  | 3.597 | Homo sapiens hypothetical protein FLJ40504 (FLJ40504), mRNA.                                                                                       |
| NM_001010990.1 | HERPUD1   | 3.594 | Homo sapiens homocysteine-inducible, endoplasmic reticulum stress-inducible, ubiquitin-like domain member 1 (HERPUD1), transcript variant 3, mRNA. |
| NM_006329.2    | FBLN5     | 3.589 | Homo sapiens fibulin 5 (FBLN5), mRNA.                                                                                                              |
| NM_002430.2    | MN1       | 3.560 | Homo sapiens meningioma (disrupted in balanced translocation) 1 (MN1), mRNA.                                                                       |
| NM_014786.2    | ARHGEF17  | 3.558 | Homo sapiens Rho guanine nucleotide exchange factor (GEF) 17 (ARHGEF17), mRNA.                                                                     |
| NM_015869.4    | PPARG     | 3.557 | Homo sapiens peroxisome proliferator-activated receptor gamma (PPARG), transcript variant 2, mRNA.                                                 |
| XM_001133042.1 | PDZRN3    | 3.557 | PREDICTED: Homo sapiens PDZ domain containing RING finger 3 (PDZRN3), mRNA.                                                                        |
| NM_153713.1    | LIX1L     | 3.546 | Homo sapiens Lix1 homolog (mouse)-like (LIX1L), mRNA.                                                                                              |
| NM_003196.1    | TCEA3     | 3.541 | Homo sapiens transcription elongation factor A (SII), 3 (TCEA3), mRNA.                                                                             |
| NM_001008528.1 | MXRA7     | 3.538 | Homo sapiens matrix-remodelling associated 7 (MXRA7), transcript variant 1, mRNA.                                                                  |
| NM_183376.1    | ARRDC4    | 3.536 | Homo sapiens arrestin domain containing 4 (ARRDC4), mRNA.                                                                                          |
| NM_002102.3    | GYPE      | 3.532 | Homo sapiens glycoporphin E (GYPE), transcript variant 1, mRNA.                                                                                    |
| NM_001073.1    | UGT2B11   | 3.530 | Homo sapiens UDP glucuronosyltransferase 2 family, polypeptide B11 (UGT2B11), mRNA.                                                                |
| NM_018653.3    | GPRC5C    | 3.525 | Homo sapiens G protein-coupled receptor, family C, group 5, member C (GPRC5C), transcript variant 2, mRNA.                                         |
| NM_022051.1    | EGLN1     | 3.524 | Homo sapiens egl nine homolog 1 (C. elegans) (EGLN1), mRNA.                                                                                        |
| NM_004048.2    | B2M       | 3.520 | Homo sapiens beta-2-microglobulin (B2M), mRNA.                                                                                                     |
| XR_018676.1    | LOC647954 | 3.515 | PREDICTED: Homo sapiens misc_RNA (LOC647954), miscRNA.                                                                                             |
| NM_025008.3    | ADAMTSL4  | 3.513 | Homo sapiens ADAMTS-like 4 (ADAMTSL4), transcript variant 2, mRNA.                                                                                 |
| AK092751       |           | 3.512 | Homo sapiens cDNA FLJ35432 fis, clone SMINT2002311                                                                                                 |
| NM_001542.2    | IGSF3     | 3.512 | Homo sapiens immunoglobulin superfamily, member 3 (IGSF3), transcript variant 1, mRNA.                                                             |
| XR_017241.1    | LOC646723 | 3.505 | PREDICTED: Homo sapiens similar to Keratin, type I cytoskeletal 18 (Cytokeratin-18) (CK-18) (Keratin-18) (K18) (LOC646723), mRNA.                  |
| NM_001003396.1 | TPD52L1   | 3.487 | Homo sapiens tumor protein D52-like 1 (TPD52L1), transcript variant 3, mRNA.                                                                       |
| NM_001542.2    | IGSF3     | 3.482 | Homo sapiens immunoglobulin superfamily, member 3 (IGSF3), transcript variant 1, mRNA.                                                             |
| NM_001018008.1 | TPM1      | 3.477 | Homo sapiens tropomyosin 1 (alpha) (TPM1), transcript variant 6, mRNA.                                                                             |
| XM_940375.2    | KLHL29    | 3.475 | PREDICTED: Homo sapiens kelch-like 29 (Drosophila) (KLHL29), mRNA.                                                                                 |
| NM_004659.1    | MMP23A    | 3.473 | Homo sapiens matrix metalloproteinase 23A (MMP23A), mRNA.                                                                                          |
| NM_002615.4    | SERPINF1  | 3.465 | Homo sapiens serpin peptidase inhibitor, clade F (alpha-2 antiplasmin, pigment epithelium derived factor), member 1 (SERPINF1), mRNA.              |

|                |              |       |                                                                                                                                                      |
|----------------|--------------|-------|------------------------------------------------------------------------------------------------------------------------------------------------------|
| NM_194431.1    | RNASE4       | 3.463 | Homo sapiens ribonuclease, RNase A family, 4 (RNASE4), transcript variant 3, mRNA.                                                                   |
| NM_000508.3    | FGA          | 3.458 | Homo sapiens fibrinogen alpha chain (FGA), transcript variant alpha-E, mRNA.                                                                         |
| NM_021158.3    | TRIB3        | 3.457 | Homo sapiens tribbles homolog 3 (Drosophila) (TRIB3), mRNA.                                                                                          |
| NM_022164.1    | TINAGL1      | 3.453 | Homo sapiens tubulointerstitial nephritis antigen-like 1 (TINAGL1), mRNA.                                                                            |
| XM_001726959.1 | KRT18P13     | 3.442 | PREDICTED: Homo sapiens keratin 18 pseudogene 13 (KRT18P13), mRNA.                                                                                   |
| NM_018557.2    | LRP1B        | 3.440 | Homo sapiens low density lipoprotein-related protein 1B (deleted in tumors) (LRP1B), mRNA.                                                           |
| NM_182571.2    | FLJ35258     | 3.438 | Homo sapiens hypothetical protein 284297 (FLJ35258), mRNA.                                                                                           |
| NM_001042445.1 | CAST         | 3.437 | Homo sapiens calpastatin (CAST), transcript variant 11, mRNA.                                                                                        |
| NM_153225.2    | RPESP        | 3.436 | Homo sapiens RPE-spondin (RPESP), mRNA.                                                                                                              |
| NM_004089.3    | TSC22D3      | 3.432 | Homo sapiens TSC22 domain family, member 3 (TSC22D3), transcript variant 2, mRNA.                                                                    |
| NM_001257.3    | CDH13        | 3.416 | Homo sapiens cadherin 13, H-cadherin (heart) (CDH13), mRNA.                                                                                          |
| NM_000495.3    | COL4A5       | 3.411 | Homo sapiens collagen, type IV, alpha 5 (COL4A5), transcript variant 1, mRNA.                                                                        |
| NM_015245.2    | ANKS1A       | 3.410 | Homo sapiens ankyrin repeat and sterile alpha motif domain containing 1A (ANKS1A), mRNA.                                                             |
| NM_002960.1    | S100A3       | 3.405 | Homo sapiens S100 calcium binding protein A3 (S100A3), mRNA.                                                                                         |
| NM_016113.3    | TRPV2        | 3.399 | Homo sapiens transient receptor potential cation channel, subfamily V, member 2 (TRPV2), mRNA.                                                       |
| NM_017540.3    | GALNT10      | 3.399 | Homo sapiens UDP-N-acetyl-alpha-D-galactosamine:polypeptide N-acetylgalactosaminyltransferase 10 (GalNAc-T10) (GALNT10), transcript variant 2, mRNA. |
| NM_015009.1    | PDZRN3       | 3.398 | Homo sapiens PDZ domain containing ring finger 3 (PDZRN3), mRNA.                                                                                     |
| NM_130783.3    | TSPAN18      | 3.396 | Homo sapiens tetraspanin 18 (TSPAN18), transcript variant 2, mRNA.                                                                                   |
| NM_001135032.1 | FAM176A      | 3.393 | Homo sapiens family with sequence similarity 176, member A (FAM176A), transcript variant 1, mRNA.                                                    |
| NM_001005376.1 | PLAUR        | 3.392 | Homo sapiens plasminogen activator, urokinase receptor (PLAUR), transcript variant 2, mRNA.                                                          |
| NM_001856.3    | COL16A1      | 3.389 | Homo sapiens collagen, type XVI, alpha 1 (COL16A1), mRNA.                                                                                            |
| NM_021958.2    | HLX          | 3.388 | Homo sapiens H2.0-like homeobox (HLX), mRNA.                                                                                                         |
| XR_038464.1    | LOC100132535 | 3.385 | PREDICTED: Homo sapiens misc_RNA (LOC100132535), miscRNA.                                                                                            |
| NM_003239.1    | TGFB3        | 3.384 | Homo sapiens transforming growth factor, beta 3 (TGFB3), mRNA.                                                                                       |
| NM_004568.4    | SERPINB6     | 3.378 | Homo sapiens serpin peptidase inhibitor, clade B (ovalbumin), member 6 (SERPINB6), mRNA.                                                             |
| NM_001042437.1 | ST3GAL5      | 3.373 | Homo sapiens ST3 beta-galactoside alpha-2,3-sialyltransferase 5 (ST3GAL5), transcript variant 2, mRNA.                                               |
| NM_003377.3    | VEGFB        | 3.371 | Homo sapiens vascular endothelial growth factor B (VEGFB), mRNA.                                                                                     |
| NM_006982.1    | CART1        | 3.362 | Homo sapiens cartilage paired-class homeoprotein 1 (CART1), mRNA.                                                                                    |
| NM_001849.3    | COL6A2       | 3.360 | Homo sapiens collagen, type VI, alpha 2 (COL6A2), transcript variant 2C2, mRNA.                                                                      |
| NM_002168.2    | IDH2         | 3.356 | Homo sapiens isocitrate dehydrogenase 2 (NADP+), mitochondrial (IDH2), nuclear gene encoding mitochondrial protein, mRNA.                            |
| NM_024702.2    | ZNF750       | 3.351 | Homo sapiens zinc finger protein 750 (ZNF750), mRNA.                                                                                                 |
| NM_006266.2    | RALGDS       | 3.349 | Homo sapiens ral guanine nucleotide dissociation stimulator (RALGDS), transcript variant 1, mRNA.                                                    |
| NM_148957.2    | TNFRSF19     | 3.349 | Homo sapiens tumor necrosis factor receptor superfamily,                                                                                             |

|                |          |       |                                                                                                                     |
|----------------|----------|-------|---------------------------------------------------------------------------------------------------------------------|
|                |          |       | member 19 (TNFRSF19), transcript variant 2, mRNA.                                                                   |
| NM_005556.3    | KRT7     | 3.341 | Homo sapiens keratin 7 (KRT7), mRNA.                                                                                |
| NR_001562.1    | ANXA2P1  | 3.341 | Homo sapiens annexin A2 pseudogene 1 (ANXA2P1) on chromosome 4.                                                     |
| NM_001080121.1 | PRNP     | 3.341 | Homo sapiens prion protein (PRNP), transcript variant 3, mRNA.                                                      |
| NM_133486.1    | MBNL3    | 3.337 | Homo sapiens muscleblind-like 3 (Drosophila) (MBNL3), transcript variant R, mRNA.                                   |
| NM_005202.1    | COL8A2   | 3.317 | Homo sapiens collagen, type VIII, alpha 2 (COL8A2), mRNA.                                                           |
| NM_001008490.1 | KLF6     | 3.313 | Homo sapiens Kruppel-like factor 6 (KLF6), transcript variant 1, mRNA.                                              |
| NM_001135032.1 | FAM176A  | 3.304 | Homo sapiens family with sequence similarity 176, member A (FAM176A), transcript variant 1, mRNA.                   |
| NM_004428.2    | EFNA1    | 3.304 | Homo sapiens ephrin-A1 (EFNA1), transcript variant 1, mRNA.                                                         |
| NM_003060.2    | SLC22A5  | 3.303 | Homo sapiens solute carrier family 22 (organic cation transporter), member 5 (SLC22A5), mRNA.                       |
| NM_152320.1    | ZNF641   | 3.295 | Homo sapiens zinc finger protein 641 (ZNF641), mRNA.                                                                |
| NM_058172.3    | ANTXR2   | 3.295 | Homo sapiens anthrax toxin receptor 2 (ANTXR2), mRNA.                                                               |
| NM_001010000.1 | ARHGAP28 | 3.291 | Homo sapiens Rho GTPase activating protein 28 (ARHGAP28), transcript variant 1, mRNA.                               |
| NM_020404.2    | CD248    | 3.288 | Homo sapiens CD248 molecule, endosialin (CD248), mRNA.                                                              |
| NM_144650.2    | ADHFE1   | 3.287 | Homo sapiens alcohol dehydrogenase, iron containing, 1 (ADHFE1), nuclear gene encoding mitochondrial protein, mRNA. |
| NM_032642.2    | WNT5B    | 3.285 | Homo sapiens wntless-type MMTV integration site family, member 5B (WNT5B), transcript variant 1, mRNA.              |
| NM_153321.1    | PMP22    | 3.281 | Homo sapiens peripheral myelin protein 22 (PMP22), transcript variant 2, mRNA.                                      |
| NM_198793.2    | CD47     | 3.272 | Homo sapiens CD47 molecule (CD47), transcript variant 2, mRNA.                                                      |
| NM_001018008.1 | TPM1     | 3.272 | Homo sapiens tropomyosin 1 (alpha) (TPM1), transcript variant 6, mRNA.                                              |
| NM_016651.4    | DACT1    | 3.269 | Homo sapiens dapper, antagonist of beta-catenin, homolog 1 (Xenopus laevis) (DACT1), mRNA.                          |
| NM_012168.4    | FBXO2    | 3.267 | Homo sapiens F-box protein 2 (FBXO2), mRNA.                                                                         |
| NM_002253.1    | KDR      | 3.265 | Homo sapiens kinase insert domain receptor (a type III receptor tyrosine kinase) (KDR), mRNA.                       |
| NM_147175.3    | HS6ST2   | 3.262 | Homo sapiens heparan sulfate 6-O-sulfotransferase 2 (HS6ST2), transcript variant S, mRNA.                           |
| NM_018837.2    | SULF2    | 3.259 | Homo sapiens sulfatase 2 (SULF2), transcript variant 1, mRNA.                                                       |
| NM_015314.2    | KIAA0895 | 3.258 | Homo sapiens KIAA0895 (KIAA0895), transcript variant 2, mRNA.                                                       |
| NM_014398.2    | LAMP3    | 3.257 | Homo sapiens lysosomal-associated membrane protein 3 (LAMP3), mRNA.                                                 |
| NM_001007023.2 | DIO2     | 3.256 | Homo sapiens deiodinase, iodothyronine, type II (DIO2), transcript variant 3, mRNA.                                 |
| NM_138455.2    | CTHRC1   | 3.251 | Homo sapiens collagen triple helix repeat containing 1 (CTHRC1), mRNA.                                              |
| NM_000689.3    | ALDH1A1  | 3.250 | Homo sapiens aldehyde dehydrogenase 1 family, member A1 (ALDH1A1), mRNA.                                            |
| NM_004048.2    | B2M      | 3.247 | Homo sapiens beta-2-microglobulin (B2M), mRNA.                                                                      |
| NM_183079.2    | PRNP     | 3.247 | Homo sapiens prion protein (PRNP), transcript variant 2, mRNA.                                                      |
| NM_004252.2    | SLC9A3R1 | 3.246 | Homo sapiens solute carrier family 9 (sodium/hydrogen exchanger), member 3 regulator 1 (SLC9A3R1), mRNA.            |
| NM_001040708.1 | HEY1     | 3.244 | Homo sapiens hairy/enhancer-of-split related with YRPW motif 1 (HEY1), transcript variant 2, mRNA.                  |
| NM_014970.2    | KIFAP3   | 3.244 | Homo sapiens kinesin-associated protein 3 (KIFAP3), mRNA.                                                           |
| NM_001012334.1 | MDK      | 3.242 | Homo sapiens midkine (neurite growth-promoting factor 2) (MDK), transcript variant 1, mRNA.                         |
| NM_144729.1    | DUSP10   | 3.240 | Homo sapiens dual specificity phosphatase 10 (DUSP10), transcript variant 3, mRNA.                                  |



|                |              |       |                                                                                                                                                    |
|----------------|--------------|-------|----------------------------------------------------------------------------------------------------------------------------------------------------|
| NM_001620.1    | AHNAK        | 3.229 | Homo sapiens AHNAK nucleoprotein (AHNAK), transcript variant 1, mRNA.                                                                              |
| NM_024692.3    | CLIP4        | 3.228 | Homo sapiens CAP-GLY domain containing linker protein family, member 4 (CLIP4), mRNA.                                                              |
| NM_003316.3    | TTC3         | 3.220 | Homo sapiens tetratricopeptide repeat domain 3 (TTC3), transcript variant 1, mRNA.                                                                 |
| NM_001099743.1 | GOLSYN       | 3.218 | Homo sapiens Golgi-localized protein (GOLSYN), transcript variant 7, mRNA.                                                                         |
| NM_000935.2    | PLOD2        | 3.196 | Homo sapiens procollagen-lysine, 2-oxoglutarate 5-dioxygenase 2 (PLOD2), transcript variant 2, mRNA.                                               |
| NM_194071.2    | CREB3L2      | 3.188 | Homo sapiens cAMP responsive element binding protein 3-like 2 (CREB3L2), mRNA.                                                                     |
| NM_016341.3    | PLCE1        | 3.184 | Homo sapiens phospholipase C, epsilon 1 (PLCE1), transcript variant 1, mRNA.                                                                       |
| NM_001343.1    | DAB2         | 3.183 | Homo sapiens disabled homolog 2, mitogen-responsive phosphoprotein ( <i>Drosophila</i> ) (DAB2), mRNA.                                             |
| XM_001723978.1 | SPNS2        | 3.180 | PREDICTED: Homo sapiens spinster homolog 2 ( <i>Drosophila</i> ) (SPNS2), mRNA.                                                                    |
| NM_001400.4    | S1PR1        | 3.174 | Homo sapiens sphingosine-1-phosphate receptor 1 (S1PR1), mRNA.                                                                                     |
| NM_145753.1    | PHLDB2       | 3.168 | Homo sapiens pleckstrin homology-like domain, family B, member 2 (PHLDB2), mRNA.                                                                   |
| NM_018640.3    | LMO3         | 3.164 | Homo sapiens LIM domain only 3 (rhombotin-like 2) (LMO3), transcript variant 1, mRNA.                                                              |
| NM_152261.1    | C12orf23     | 3.152 | Homo sapiens chromosome 12 open reading frame 23 (C12orf23), mRNA.                                                                                 |
| NM_138284.1    | IL17D        | 3.148 | Homo sapiens interleukin 17D (IL17D), mRNA.                                                                                                        |
| NM_003884.4    | KAT2B        | 3.145 | Homo sapiens K(lysine) acetyltransferase 2B (KAT2B), mRNA.                                                                                         |
| NM_001300.4    | KLF6         | 3.144 | Homo sapiens Kruppel-like factor 6 (KLF6), transcript variant 2, mRNA.                                                                             |
| XM_001726834.1 | LOC100129681 | 3.143 | PREDICTED: Homo sapiens similar to NPC-A-7 (LOC100129681), mRNA.                                                                                   |
| NM_018222.3    | PARVA        | 3.131 | Homo sapiens parvin, alpha (PARVA), mRNA.                                                                                                          |
| NM_003567.2    | BCAR3        | 3.130 | Homo sapiens breast cancer anti-estrogen resistance 3 (BCAR3), mRNA.                                                                               |
| NM_182943.2    | PLOD2        | 3.130 | Homo sapiens procollagen-lysine, 2-oxoglutarate 5-dioxygenase 2 (PLOD2), transcript variant 1, mRNA.                                               |
| NM_004067.2    | CHN2         | 3.130 | Homo sapiens chimerin (chimaerin) 2 (CHN2), transcript variant 2, mRNA.                                                                            |
| NM_006053.2    | TCIRG1       | 3.128 | Homo sapiens T-cell, immune regulator 1, ATPase, H <sup>+</sup> transporting, lysosomal V0 subunit A3 (TCIRG1), transcript variant 2, mRNA.        |
| NM_019554.2    | S100A4       | 3.127 | Homo sapiens S100 calcium binding protein A4 (S100A4), transcript variant 2, mRNA.                                                                 |
| NM_001669.2    | ARSD         | 3.127 | Homo sapiens arylsulfatase D (ARSD), transcript variant 1, mRNA.                                                                                   |
| NM_001114981.1 | TP63         | 3.124 | Homo sapiens tumor protein p63 (TP63), transcript variant 5, mRNA.                                                                                 |
| NM_006142.3    | SFN          | 3.122 | Homo sapiens stratifin (SFN), mRNA.                                                                                                                |
| NM_014674.1    | EDEM1        | 3.119 | Homo sapiens ER degradation enhancer, mannosidase alpha-like 1 (EDEM1), mRNA.                                                                      |
| NM_175907.3    | ZADH2        | 3.111 | Homo sapiens zinc binding alcohol dehydrogenase domain containing 2 (ZADH2), mRNA.                                                                 |
| NM_001010990.1 | HERPUD1      | 3.110 | Homo sapiens homocysteine-inducible, endoplasmic reticulum stress-inducible, ubiquitin-like domain member 1 (HERPUD1), transcript variant 3, mRNA. |
| NM_175856.4    | CHSY3        | 3.104 | Homo sapiens chondroitin sulfate synthase 3 (CHSY3), mRNA.                                                                                         |
| NM_000305.2    | PON2         | 3.103 | Homo sapiens paraoxonase 2 (PON2), transcript variant 1, mRNA.                                                                                     |

|                |            |       |                                                                                                                              |
|----------------|------------|-------|------------------------------------------------------------------------------------------------------------------------------|
| NM_032048.2    | EMILIN2    | 3.096 | Homo sapiens elastin microfibril interfacier 2 (EMILIN2), mRNA.                                                              |
| NM_175744.4    | RHOC       | 3.095 | Homo sapiens ras homolog gene family, member C (RHOC), transcript variant 1, mRNA.                                           |
| NM_000865.1    | HTR1E      | 3.083 | Homo sapiens 5-hydroxytryptamine (serotonin) receptor 1E (HTR1E), mRNA.                                                      |
| NM_002166.4    | ID2        | 3.081 | Homo sapiens inhibitor of DNA binding 2, dominant negative helix-loop-helix protein (ID2), mRNA.                             |
| NM_001153.2    | ANXA4      | 3.080 | Homo sapiens annexin A4 (ANXA4), mRNA.                                                                                       |
| NM_001010000.1 | ARHGAP28   | 3.076 | Homo sapiens Rho GTPase activating protein 28 (ARHGAP28), transcript variant 1, mRNA.                                        |
| NM_000602.1    | SERPINE1   | 3.076 | Homo sapiens serpin peptidase inhibitor, clade E (nexin, plasminogen activator inhibitor type 1), member 1 (SERPINE1), mRNA. |
| NM_001031615.1 | ALDH3B2    | 3.073 | Homo sapiens aldehyde dehydrogenase 3 family, member B2 (ALDH3B2), transcript variant 2, mRNA.                               |
| NM_001719.1    | BMP7       | 3.072 | Homo sapiens bone morphogenetic protein 7 (osteogenic protein 1) (BMP7), mRNA.                                               |
| XM_001716667.1 | LOC731932  | 3.061 | PREDICTED: Homo sapiens hypothetical LOC731932 (LOC731932), mRNA.                                                            |
| NR_024330.1    | NCRNA00085 | 3.056 | Homo sapiens non-protein coding RNA 85 (NCRNA00085), non-coding RNA.                                                         |
| NM_002662.2    | PLD1       | 3.054 | Homo sapiens phospholipase D1, phosphatidylcholine-specific (PLD1), mRNA.                                                    |
| NM_032508.1    | TMEM185A   | 3.051 | Homo sapiens transmembrane protein 185A (TMEM185A), mRNA.                                                                    |
| NM_000846.4    | GSTA2      | 3.050 | Homo sapiens glutathione S-transferase alpha 2 (GSTA2), mRNA.                                                                |
| NM_019605.2    | SERTAD4    | 3.050 | Homo sapiens SERTA domain containing 4 (SERTAD4), mRNA.                                                                      |
| NM_001497.2    | B4GALT1    | 3.050 | Homo sapiens UDP-Gal:betaGlcNAc beta 1,4-galactosyltransferase, polypeptide 1 (B4GALT1), mRNA.                               |
| NM_198285.1    | WDR86      | 3.048 | Homo sapiens WD repeat domain 86 (WDR86), mRNA.                                                                              |
| NM_005950.1    | MT1G       | 3.045 | Homo sapiens metallothionein 1G (MT1G), mRNA.                                                                                |
| NM_001748.3    | CAPN2      | 3.038 | Homo sapiens calpain 2, (m/II) large subunit (CAPN2), mRNA.                                                                  |
| NM_001018056.1 | VLDLR      | 3.036 | Homo sapiens very low density lipoprotein receptor (VLDLR), transcript variant 2, mRNA.                                      |
| NM_203434.2    | IER5L      | 3.035 | Homo sapiens immediate early response 5-like (IER5L), mRNA.                                                                  |
| NM_001012513.1 | GRP        | 3.033 | Homo sapiens gastrin-releasing peptide (GRP), transcript variant 3, mRNA.                                                    |
| NM_001024455.2 | RGAG4      | 3.030 | Homo sapiens retrotransposon gag domain containing 4 (RGAG4), mRNA.                                                          |
| NM_003221.3    | TFAP2B     | 3.030 | Homo sapiens transcription factor AP-2 beta (activating enhancer binding protein 2 beta) (TFAP2B), mRNA.                     |
| NM_000428.2    | LTBP2      | 3.027 | Homo sapiens latent transforming growth factor beta binding protein 2 (LTBP2), mRNA.                                         |
| NM_005302.2    | GPR37      | 3.027 | Homo sapiens G protein-coupled receptor 37 (endothelin receptor type B-like) (GPR37), mRNA.                                  |
| NM_000693.2    | ALDH1A3    | 3.021 | Homo sapiens aldehyde dehydrogenase 1 family, member A3 (ALDH1A3), mRNA.                                                     |
| NM_012098.2    | ANGPTL2    | 3.016 | Homo sapiens angiopoietin-like 2 (ANGPTL2), mRNA.                                                                            |
| XR_015662.2    | LOC731954  | 3.015 | PREDICTED: Homo sapiens similar to supervillin (LOC731954), mRNA.                                                            |
| NM_020197.1    | SMYD2      | 3.014 | Homo sapiens SET and MYND domain containing 2 (SMYD2), mRNA.                                                                 |
| NM_015059.1    | TLN2       | 3.012 | Homo sapiens talin 2 (TLN2), mRNA.                                                                                           |
| NM_014220.2    | TM4SF1     | 3.006 | Homo sapiens transmembrane 4 L six family member 1 (TM4SF1), mRNA.                                                           |
| NM_133486.1    | MBNL3      | 2.995 | Homo sapiens muscleblind-like 3 (Drosophila) (MBNL3), transcript variant R, mRNA.                                            |

|                |           |       |                                                                                                                        |
|----------------|-----------|-------|------------------------------------------------------------------------------------------------------------------------|
| NM_002575.1    | SERPINB2  | 2.993 | Homo sapiens serpin peptidase inhibitor, clade B (ovalbumin), member 2 (SERPINB2), mRNA.                               |
| NM_001098500.1 | KIAA1217  | 2.993 | Homo sapiens KIAA1217 (KIAA1217), transcript variant 2, mRNA.                                                          |
| NM_002051.2    | GATA3     | 2.992 | Homo sapiens GATA binding protein 3 (GATA3), transcript variant 2, mRNA.                                               |
| NM_199138.1    | FAM123A   | 2.989 | Homo sapiens family with sequence similarity 123A (FAM123A), transcript variant 2, mRNA.                               |
| NM_001204.5    | BMPR2     | 2.988 | Homo sapiens bone morphogenetic protein receptor, type II (serine/threonine kinase) (BMPR2), mRNA.                     |
| NM_005328.1    | HAS2      | 2.983 | Homo sapiens hyaluronan synthase 2 (HAS2), mRNA.                                                                       |
| NM_144629.1    | RFTN2     | 2.981 | Homo sapiens raftlin family member 2 (RFTN2), mRNA.                                                                    |
| NM_003632.1    | CNTNAP1   | 2.981 | Homo sapiens contactin associated protein 1 (CNTNAP1), mRNA.                                                           |
| NM_018194.2    | HHAT      | 2.980 | Homo sapiens hedgehog acyltransferase (HHAT), mRNA.                                                                    |
| XM_001717454.1 | KLHL29    | 2.973 | PREDICTED: Homo sapiens kelch-like 29 (Drosophila) (KLHL29), mRNA.                                                     |
| NM_020440.2    | PTGFRN    | 2.968 | Homo sapiens prostaglandin F2 receptor negative regulator (PTGFRN), mRNA.                                              |
| BQ717127       |           | 2.968 | AGENCOURT_8109349 Lupski_sympathetic_trunk Homo sapiens cDNA clone IMAGE:6189406 5, mRNA sequence                      |
| NM_016619.1    | PLAC8     | 2.967 | Homo sapiens placenta-specific 8 (PLAC8), mRNA.                                                                        |
| NM_005559.2    | LAMA1     | 2.964 | Homo sapiens laminin, alpha 1 (LAMA1), mRNA.                                                                           |
| NM_001003397.1 | TPD52L1   | 2.957 | Homo sapiens tumor protein D52-like 1 (TPD52L1), transcript variant 4, mRNA.                                           |
| NM_018271.2    | FLJ10916  | 2.949 | Homo sapiens hypothetical protein FLJ10916 (FLJ10916), mRNA.                                                           |
| NM_005194.2    | CEBPB     | 2.948 | Homo sapiens CCAAT/enhancer binding protein (C/EBP), beta (CEBPB), mRNA.                                               |
| NM_005860.2    | FSTL3     | 2.945 | Homo sapiens follistatin-like 3 (secreted glycoprotein) (FSTL3), mRNA.                                                 |
| NM_016644.1    | PRR16     | 2.943 | Homo sapiens proline rich 16 (PRR16), mRNA.                                                                            |
| NM_152447.2    | LRFN5     | 2.943 | Homo sapiens leucine rich repeat and fibronectin type III domain containing 5 (LRFN5), mRNA.                           |
| NM_012307.2    | EPB41L3   | 2.943 | Homo sapiens erythrocyte membrane protein band 4.1-like 3 (EPB41L3), mRNA.                                             |
| NM_002204.1    | ITGA3     | 2.943 | Homo sapiens integrin, alpha 3 (antigen CD49C, alpha 3 subunit of VLA-3 receptor) (ITGA3), transcript variant a, mRNA. |
| BC036485       |           | 2.933 | Homo sapiens cDNA clone IMAGE:5261213                                                                                  |
| NM_175738.3    | RAB37     | 2.932 | Homo sapiens RAB37, member RAS oncogene family (RAB37), transcript variant 3, mRNA.                                    |
| XR_017231.2    | KRT8P9    | 2.926 | PREDICTED: Homo sapiens misc_RNA (KRT8P9), miscRNA.                                                                    |
| NM_015529.2    | MOXD1     | 2.921 | Homo sapiens monooxygenase, DBH-like 1 (MOXD1), transcript variant 2, mRNA.                                            |
| CR627122       |           | 2.921 | Homo sapiens mRNA; cDNA DKFZp779M2422 (from clone DKFZp779M2422)                                                       |
| NM_001080471.1 | PEAR1     | 2.919 | Homo sapiens platelet endothelial aggregation receptor 1 (PEAR1), mRNA.                                                |
| NM_001024074.1 | HNMT      | 2.918 | Homo sapiens histamine N-methyltransferase (HNMT), transcript variant 2, mRNA.                                         |
| NM_021945.4    | C6orf85   | 2.914 | Homo sapiens chromosome 6 open reading frame 85 (C6orf85), mRNA.                                                       |
| NM_000350.2    | ABCA4     | 2.912 | Homo sapiens ATP-binding cassette, sub-family A (ABC1), member 4 (ABCA4), mRNA.                                        |
| NM_003246.2    | THBS1     | 2.911 | Homo sapiens thrombospondin 1 (THBS1), mRNA.                                                                           |
| NM_004388.1    | CTBS      | 2.907 | Homo sapiens chitinase, di-N-acetyl- (CTBS), mRNA.                                                                     |
| XR_040503.1    | LOC729680 | 2.906 | PREDICTED: Homo sapiens misc_RNA (LOC729680), miscRNA.                                                                 |
| NM_020440.2    | PTGFRN    | 2.903 | Homo sapiens prostaglandin F2 receptor negative regulator (PTGFRN), mRNA.                                              |
| NM_005902.3    | SMAD3     | 2.901 | Homo sapiens SMAD family member 3 (SMAD3), transcript                                                                  |

|                |          |       |                                                                                                                                            |
|----------------|----------|-------|--------------------------------------------------------------------------------------------------------------------------------------------|
|                |          |       | variant 1, mRNA.                                                                                                                           |
| NM_021101.3    | CLDN1    | 2.899 | Homo sapiens claudin 1 (CLDN1), mRNA.                                                                                                      |
| NM_015927.3    | TGFB111  | 2.899 | Homo sapiens transforming growth factor beta 1 induced transcript 1 (TGFB111), transcript variant 2, mRNA.                                 |
| NM_001008539.2 | SLC7A2   | 2.898 | Homo sapiens solute carrier family 7 (cationic amino acid transporter, y+ system), member 2 (SLC7A2), transcript variant 2, mRNA.          |
| NM_005518.2    | HMGCS2   | 2.898 | Homo sapiens 3-hydroxy-3-methylglutaryl-Coenzyme A synthase 2 (mitochondrial) (HMGCS2), nuclear gene encoding mitochondrial protein, mRNA. |
| NM_172060.1    | EYA1     | 2.897 | Homo sapiens eyes absent homolog 1 (Drosophila) (EYA1), transcript variant 1, mRNA.                                                        |
| NM_020251.2    | ARRB1    | 2.896 | Homo sapiens arrestin, beta 1 (ARRB1), transcript variant 2, mRNA.                                                                         |
| NM_001221.2    | CAMK2D   | 2.895 | Homo sapiens calcium/calmodulin-dependent protein kinase (CaM kinase) II delta (CAMK2D), transcript variant 3, mRNA.                       |
| NM_014057.3    | OGN      | 2.890 | Homo sapiens osteoglycin (OGN), transcript variant 3, mRNA.                                                                                |
| NM_033394.1    | TANC1    | 2.887 | Homo sapiens tetratricopeptide repeat, ankyrin repeat and coiled-coil containing 1 (TANC1), mRNA.                                          |
| NM_013379.2    | DPP7     | 2.887 | Homo sapiens dipeptidyl-peptidase 7 (DPP7), mRNA.                                                                                          |
| NM_138991.1    | BACE2    | 2.885 | Homo sapiens beta-site APP-cleaving enzyme 2 (BACE2), transcript variant c, mRNA.                                                          |
| NM_002184.2    | IL6ST    | 2.883 | Homo sapiens interleukin 6 signal transducer (gp130, oncostatin M receptor) (IL6ST), transcript variant 1, mRNA.                           |
| NM_015917.1    | GSTK1    | 2.882 | Homo sapiens glutathione S-transferase kappa 1 (GSTK1), mRNA.                                                                              |
| NM_001616.3    | ACVR2A   | 2.877 | Homo sapiens activin A receptor, type IIA (ACVR2A), mRNA.                                                                                  |
| NM_018438.4    | FBXO6    | 2.877 | Homo sapiens F-box protein 6 (FBXO6), mRNA.                                                                                                |
| NM_001993.2    | F3       | 2.876 | Homo sapiens coagulation factor III (thromboplastin, tissue factor) (F3), mRNA.                                                            |
| NM_015374.1    | UNC84B   | 2.868 | Homo sapiens unc-84 homolog B (C. elegans) (UNC84B), mRNA.                                                                                 |
| NM_001042442.1 | CAST     | 2.868 | Homo sapiens calpastatin (CAST), transcript variant 8, mRNA.                                                                               |
| NM_006982.2    | ALX1     | 2.864 | Homo sapiens ALX homeobox 1 (ALX1), mRNA.                                                                                                  |
| NM_000203.3    | IDUA     | 2.863 | Homo sapiens iduronidase, alpha-L- (IDUA), mRNA.                                                                                           |
| NM_007310.1    | COMT     | 2.862 | Homo sapiens catechol-O-methyltransferase (COMT), transcript variant S-COMT, mRNA.                                                         |
| NM_178497.2    | C4orf26  | 2.861 | Homo sapiens chromosome 4 open reading frame 26 (C4orf26), mRNA.                                                                           |
| NM_001007236.1 | ERVK6    | 2.859 | Homo sapiens endogenous retroviral sequence K, 6 (ERVK6), mRNA.                                                                            |
| NM_018327.2    | SPTLC3   | 2.858 | Homo sapiens serine palmitoyltransferase, long chain base subunit 3 (SPTLC3), mRNA.                                                        |
| NM_021070.2    | LTBP3    | 2.857 | Homo sapiens latent transforming growth factor beta binding protein 3 (LTBP3), mRNA.                                                       |
| NM_001995.2    | ACSL1    | 2.854 | Homo sapiens acyl-CoA synthetase long-chain family member 1 (ACSL1), mRNA.                                                                 |
| NM_004335.2    | BST2     | 2.850 | Homo sapiens bone marrow stromal cell antigen 2 (BST2), mRNA.                                                                              |
| NM_001924.2    | GADD45A  | 2.849 | Homo sapiens growth arrest and DNA-damage-inducible, alpha (GADD45A), mRNA.                                                                |
| NM_005046.2    | KLK7     | 2.844 | Homo sapiens kallikrein-related peptidase 7 (KLK7), transcript variant 1, mRNA.                                                            |
| NM_178314.2    | RILPL1   | 2.840 | Homo sapiens Rab interacting lysosomal protein-like 1 (RILPL1), mRNA.                                                                      |
| NM_201554.1    | DGKA     | 2.840 | Homo sapiens diacylglycerol kinase, alpha 80kDa (DGKA), transcript variant 4, mRNA.                                                        |
| NM_030672.2    | ARHGAP28 | 2.839 | Homo sapiens Rho GTPase activating protein 28 (ARHGAP28), transcript variant 2, mRNA.                                                      |
| NM_182676.1    | PLTP     | 2.836 | Homo sapiens phospholipid transfer protein (PLTP), transcript                                                                              |

|                |           |       |                                                                                                                                                       |
|----------------|-----------|-------|-------------------------------------------------------------------------------------------------------------------------------------------------------|
|                |           |       | variant 2, mRNA.                                                                                                                                      |
| NM_006760.2    | UPK2      | 2.835 | Homo sapiens uroplakin 2 (UPK2), mRNA.                                                                                                                |
| NM_003078.3    | SMARCD3   | 2.830 | Homo sapiens SWI/SNF related, matrix associated, actin dependent regulator of chromatin, subfamily d, member 3 (SMARCD3), transcript variant 2, mRNA. |
| NM_001040058.1 | SPP1      | 2.830 | Homo sapiens secreted phosphoprotein 1 (SPP1), transcript variant 1, mRNA.                                                                            |
| NM_152509.1    | FLJ31568  | 2.827 | Homo sapiens FLJ31568 protein (FLJ31568), mRNA.                                                                                                       |
| NM_015881.5    | DKK3      | 2.823 | Homo sapiens dickkopf homolog 3 (Xenopus laevis) (DKK3), transcript variant 1, mRNA.                                                                  |
| NM_004173.2    | SLC7A4    | 2.818 | Homo sapiens solute carrier family 7 (cationic amino acid transporter, y+ system), member 4 (SLC7A4), mRNA.                                           |
| NM_022168.2    | IFIH1     | 2.817 | Homo sapiens interferon induced with helicase C domain 1 (IFIH1), mRNA.                                                                               |
| NM_001009934.1 | DNASE1L1  | 2.811 | Homo sapiens deoxyribonuclease I-like 1 (DNASE1L1), transcript variant 4, mRNA.                                                                       |
| AL833463       |           | 2.810 | Homo sapiens mRNA; cDNA DKFZp686P07116 (from clone DKFZp686P07116)                                                                                    |
| NM_134264.2    | WSB1      | 2.808 | Homo sapiens WD repeat and SOCS box-containing 1 (WSB1), transcript variant 3, mRNA.                                                                  |
| NM_005951.2    | MT1H      | 2.806 | Homo sapiens metallothionein 1H (MT1H), mRNA.                                                                                                         |
| NM_001754.3    | RUNX1     | 2.803 | Homo sapiens runt-related transcription factor 1 (acute myeloid leukemia 1; aml1 oncogene) (RUNX1), transcript variant 1, mRNA.                       |
| NM_002430.2    | MN1       | 2.801 | Homo sapiens meningioma (disrupted in balanced translocation) 1 (MN1), mRNA.                                                                          |
| NM_145753.1    | PHLDB2    | 2.800 | Homo sapiens pleckstrin homology-like domain, family B, member 2 (PHLDB2), mRNA.                                                                      |
| XM_939337.2    | RBM20     | 2.797 | PREDICTED: Homo sapiens RNA binding motif protein 20 (RBM20), mRNA.                                                                                   |
| NM_001114734.1 | PABPC4L   | 2.795 | Homo sapiens poly(A) binding protein, cytoplasmic 4-like (PABPC4L), mRNA.                                                                             |
| NM_052880.3    | PIK3IP1   | 2.793 | Homo sapiens phosphoinositide-3-kinase interacting protein 1 (PIK3IP1), mRNA.                                                                         |
| NM_000676.2    | ADORA2B   | 2.791 | Homo sapiens adenosine A2b receptor (ADORA2B), mRNA.                                                                                                  |
| NM_001024912.1 | CEACAM1   | 2.791 | Homo sapiens carcinoembryonic antigen-related cell adhesion molecule 1 (biliary glycoprotein) (CEACAM1), transcript variant 2, mRNA.                  |
| NM_024060.2    | AHNAK     | 2.790 | Homo sapiens AHNAK nucleoprotein (AHNAK), transcript variant 2, mRNA.                                                                                 |
| NM_001560.2    | IL13RA1   | 2.789 | Homo sapiens interleukin 13 receptor, alpha 1 (IL13RA1), mRNA.                                                                                        |
| NM_020387.2    | RAB25     | 2.789 | Homo sapiens RAB25, member RAS oncogene family (RAB25), mRNA.                                                                                         |
| NM_020387.2    | RAB25     | 2.789 | Homo sapiens RAB25, member RAS oncogene family (RAB25), mRNA.                                                                                         |
| NM_003759.2    | SLC4A4    | 2.784 | Homo sapiens solute carrier family 4, sodium bicarbonate cotransporter, member 4 (SLC4A4), transcript variant 2, mRNA.                                |
| NM_004052.2    | BNIP3     | 2.784 | Homo sapiens BCL2/adenovirus E1B 19kDa interacting protein 3 (BNIP3), nuclear gene encoding mitochondrial protein, mRNA.                              |
| NM_024866.4    | ADM2      | 2.782 | Homo sapiens adrenomedullin 2 (ADM2), mRNA.                                                                                                           |
| NM_004560.2    | ROR2      | 2.778 | Homo sapiens receptor tyrosine kinase-like orphan receptor 2 (ROR2), mRNA.                                                                            |
| NM_001018065.1 | NTRK2     | 2.777 | Homo sapiens neurotrophic tyrosine kinase, receptor, type 2 (NTRK2), transcript variant d, mRNA.                                                      |
| NM_000717.2    | CA4       | 2.774 | Homo sapiens carbonic anhydrase IV (CA4), mRNA.                                                                                                       |
| NM_004172.3    | SLC1A3    | 2.774 | Homo sapiens solute carrier family 1 (glial high affinity glutamate transporter), member 3 (SLC1A3), mRNA.                                            |
| XM_001129441.2 | LOC645166 | 2.773 | PREDICTED: Homo sapiens similar to lymphocyte-specific protein                                                                                        |

|                |           |       |                                                                                                                                                                        |
|----------------|-----------|-------|------------------------------------------------------------------------------------------------------------------------------------------------------------------------|
|                |           |       | 1 (LOC645166), mRNA.                                                                                                                                                   |
| NM_199069.1    | NDUFAF3   | 2.773 | Homo sapiens NADH dehydrogenase (ubiquinone) 1 alpha subcomplex, assembly factor 3 (NDUFAF3), nuclear gene encoding mitochondrial protein, transcript variant 1, mRNA. |
| NM_178156.1    | FUT8      | 2.772 | Homo sapiens fucosyltransferase 8 (alpha (1,6) fucosyltransferase) (FUT8), transcript variant 3, mRNA.                                                                 |
| NM_182760.2    | SUMF1     | 2.769 | Homo sapiens sulfatase modifying factor 1 (SUMF1), mRNA.                                                                                                               |
| NM_024935.2    | KIAA1772  | 2.769 | Homo sapiens KIAA1772 (KIAA1772), mRNA.                                                                                                                                |
| NM_004443.3    | EPHB3     | 2.763 | Homo sapiens EPH receptor B3 (EPHB3), mRNA.                                                                                                                            |
| AB074162       |           | 2.762 | Homo sapiens primary neuroblastoma cDNA, clone:Nbla10527, full insert sequence                                                                                         |
| NM_001042443.1 | CAST      | 2.762 | Homo sapiens calpastatin (CAST), transcript variant 9, mRNA.                                                                                                           |
| NM_006042.1    | HS3ST3A1  | 2.761 | Homo sapiens heparan sulfate (glucosamine) 3-O-sulfotransferase 3A1 (HS3ST3A1), mRNA.                                                                                  |
| NM_006522.3    | WNT6      | 2.760 | Homo sapiens wntless-type MMTV integration site family, member 6 (WNT6), mRNA.                                                                                         |
| NM_001137601.1 | ZBTB42    | 2.759 | Homo sapiens zinc finger and BTB domain containing 42 (ZBTB42), mRNA.                                                                                                  |
| NM_001924.2    | GADD45A   | 2.759 | Homo sapiens growth arrest and DNA-damage-inducible, alpha (GADD45A), mRNA.                                                                                            |
| NM_080815.2    | COL13A1   | 2.755 | Homo sapiens collagen, type XIII, alpha 1 (COL13A1), transcript variant 19, mRNA.                                                                                      |
| NM_017983.4    | WIPI1     | 2.754 | Homo sapiens WD repeat domain, phosphoinositide interacting 1 (WIPI1), mRNA.                                                                                           |
| NM_080829.2    | FAM65C    | 2.752 | Homo sapiens family with sequence similarity 65, member C (FAM65C), mRNA.                                                                                              |
| NM_001615.3    | ACTG2     | 2.751 | Homo sapiens actin, gamma 2, smooth muscle, enteric (ACTG2), mRNA.                                                                                                     |
| NM_152423.2    | MUM1L1    | 2.750 | Homo sapiens melanoma associated antigen (mutated) 1-like 1 (MUM1L1), mRNA.                                                                                            |
| NM_031439.2    | SOX7      | 2.750 | Homo sapiens SRY (sex determining region Y)-box 7 (SOX7), mRNA.                                                                                                        |
| NM_005491.2    | MAMLD1    | 2.750 | Homo sapiens mastermind-like domain containing 1 (MAMLD1), mRNA.                                                                                                       |
| NM_025106.2    | SPSB1     | 2.748 | Homo sapiens splA/ryanodine receptor domain and SOCS box containing 1 (SPSB1), mRNA.                                                                                   |
| NM_181533.3    | ABHD12B   | 2.745 | Homo sapiens abhydrolase domain containing 12B (ABHD12B), transcript variant 2, mRNA.                                                                                  |
| NM_001077188.1 | HS6ST2    | 2.744 | Homo sapiens heparan sulfate 6-O-sulfotransferase 2 (HS6ST2), transcript variant L, mRNA.                                                                              |
| NM_006645.2    | STARD10   | 2.743 | Homo sapiens StAR-related lipid transfer (START) domain containing 10 (STARD10), mRNA.                                                                                 |
| NM_001804.2    | CDX1      | 2.741 | Homo sapiens caudal type homeobox 1 (CDX1), mRNA.                                                                                                                      |
| AL157484       |           | 2.740 | Homo sapiens mRNA; cDNA DKFZp762M127 (from clone DKFZp762M127)                                                                                                         |
| NM_006854.3    | KDEL2     | 2.736 | Homo sapiens KDEL (Lys-Asp-Glu-Leu) endoplasmic reticulum protein retention receptor 2 (KDEL2), transcript variant 1, mRNA.                                            |
| NM_000305.2    | PON2      | 2.733 | Homo sapiens paraoxonase 2 (PON2), transcript variant 1, mRNA.                                                                                                         |
| NM_012343.3    | NNT       | 2.727 | Homo sapiens nicotinamide nucleotide transhydrogenase (NNT), nuclear gene encoding mitochondrial protein, transcript variant 1, mRNA.                                  |
| XM_944321.1    | LOC402560 | 2.726 | PREDICTED: Homo sapiens hypothetical LOC402560 (LOC402560), mRNA.                                                                                                      |
| NM_002633.2    | PGM1      | 2.725 | Homo sapiens phosphoglucomutase 1 (PGM1), mRNA.                                                                                                                        |
| NM_013271.2    | PCSK1N    | 2.724 | Homo sapiens proprotein convertase subtilisin/kexin type 1 inhibitor (PCSK1N), mRNA.                                                                                   |

|                |              |       |                                                                                                                                  |
|----------------|--------------|-------|----------------------------------------------------------------------------------------------------------------------------------|
| NM_173354.3    | SIK1         | 2.719 | Homo sapiens salt-inducible kinase 1 (SIK1), mRNA.                                                                               |
| XM_001724386.1 | LOC100134265 | 2.716 | PREDICTED: Homo sapiens similar to calbindin 2 full length protein (LOC100134265), mRNA.                                         |
| NM_005559.2    | LAMA1        | 2.713 | Homo sapiens laminin, alpha 1 (LAMA1), mRNA.                                                                                     |
| NM_004126.3    | GNG11        | 2.710 | Homo sapiens guanine nucleotide binding protein (G protein), gamma 11 (GNG11), mRNA.                                             |
| NM_001005242.1 | PKP2         | 2.708 | Homo sapiens plakophilin 2 (PKP2), transcript variant 2a, mRNA.                                                                  |
| NM_004598.3    | SPOCK1       | 2.707 | Homo sapiens sparc/osteonectin, cwcv and kazal-like domains proteoglycan (testican) 1 (SPOCK1), mRNA.                            |
| NM_015274.1    | MAN2B2       | 2.706 | Homo sapiens mannosidase, alpha, class 2B, member 2 (MAN2B2), mRNA.                                                              |
| NM_021972.2    | SPHK1        | 2.704 | Homo sapiens sphingosine kinase 1 (SPHK1), transcript variant 1, mRNA.                                                           |
| NM_002614.3    | PDZK1        | 2.704 | Homo sapiens PDZ domain containing 1 (PDZK1), mRNA.                                                                              |
| NM_024605.3    | ARHGAP10     | 2.703 | Homo sapiens Rho GTPase activating protein 10 (ARHGAP10), mRNA.                                                                  |
| NM_198392.1    | TCF21        | 2.702 | Homo sapiens transcription factor 21 (TCF21), transcript variant 1, mRNA.                                                        |
| NM_198951.1    | TGM2         | 2.701 | Homo sapiens transglutaminase 2 (C polypeptide, protein-glutamine-gamma-glutamyltransferase) (TGM2), transcript variant 2, mRNA. |
| NM_001037633.1 | SIL1         | 2.700 | Homo sapiens SIL1 homolog, endoplasmic reticulum chaperone ( <i>S. cerevisiae</i> ) (SIL1), transcript variant 1, mRNA.          |
| NM_181501.1    | ITGA1        | 2.698 | Homo sapiens integrin, alpha 1 (ITGA1), mRNA.                                                                                    |
| NM_000935.2    | PLOD2        | 2.695 | Homo sapiens procollagen-lysine, 2-oxoglutarate 5-dioxygenase 2 (PLOD2), transcript variant 2, mRNA.                             |
| NM_199181.2    | C20orf117    | 2.692 | Homo sapiens chromosome 20 open reading frame 117 (C20orf117), transcript variant 2, mRNA.                                       |
| NM_152629.3    | GLIS3        | 2.690 | Homo sapiens GLIS family zinc finger 3 (GLIS3), transcript variant 2, mRNA.                                                      |
| AK123807       |              | 2.688 | Homo sapiens cDNA FLJ41813 fis, clone NT2RI2011450                                                                               |
| NM_032305.1    | POLR3GL      | 2.687 | Homo sapiens polymerase (RNA) III (DNA directed) polypeptide G (32kD)-like (POLR3GL), mRNA.                                      |
| NM_152387.2    | KCTD18       | 2.682 | Homo sapiens potassium channel tetramerisation domain containing 18 (KCTD18), mRNA.                                              |
| NM_133436.1    | ASNS         | 2.675 | Homo sapiens asparagine synthetase (ASNS), transcript variant 1, mRNA.                                                           |
| NM_005141.2    | FGB          | 2.674 | Homo sapiens fibrinogen beta chain (FGB), mRNA.                                                                                  |
| NM_014745.1    | FAM38A       | 2.666 | Homo sapiens family with sequence similarity 38, member A (FAM38A), mRNA.                                                        |
| NM_021034.2    | IFITM3       | 2.666 | Homo sapiens interferon induced transmembrane protein 3 (1-8U) (IFITM3), mRNA.                                                   |
| XR_017689.1    | KRT18P28     | 2.664 | PREDICTED: Homo sapiens misc_RNA (KRT18P28), miscRNA.                                                                            |
| NM_053032.2    | MYLK         | 2.662 | Homo sapiens myosin light chain kinase (MYLK), transcript variant 8, mRNA.                                                       |
| NM_175617.3    | MT1E         | 2.661 | Homo sapiens metallothionein 1E (MT1E), mRNA.                                                                                    |
| NM_004099.4    | STOM         | 2.661 | Homo sapiens stomatin (STOM), transcript variant 1, mRNA.                                                                        |
| NM_001024630.2 | RUNX2        | 2.661 | Homo sapiens runt-related transcription factor 2 (RUNX2), transcript variant 1, mRNA.                                            |
| NM_130435.2    | PTPRE        | 2.659 | Homo sapiens protein tyrosine phosphatase, receptor type, E (PTPRE), transcript variant 2, mRNA.                                 |
| NM_001012334.1 | MDK          | 2.657 | Homo sapiens midkine (neurite growth-promoting factor 2) (MDK), transcript variant 1, mRNA.                                      |
| NM_007029.2    | STMN2        | 2.657 | Homo sapiens stathmin-like 2 (STMN2), mRNA.                                                                                      |
| NM_001604.3    | PAX6         | 2.656 | Homo sapiens paired box 6 (PAX6), transcript variant 2, mRNA.                                                                    |
| NM_003480.2    | MFAP5        | 2.653 | Homo sapiens microfibrillar associated protein 5 (MFAP5), mRNA.                                                                  |
| NM_013995.1    | LAMP2        | 2.653 | Homo sapiens lysosomal-associated membrane protein 2                                                                             |

|                |              |       |                                                                                                                             |
|----------------|--------------|-------|-----------------------------------------------------------------------------------------------------------------------------|
|                |              |       | (LAMP2), transcript variant LAMP2B, mRNA.                                                                                   |
| NM_020433.4    | JPH2         | 2.653 | Homo sapiens junctophilin 2 (JPH2), transcript variant 1, mRNA.                                                             |
| NM_014476.1    | PDLIM3       | 2.653 | Homo sapiens PDZ and LIM domain 3 (PDLIM3), mRNA.                                                                           |
| NM_001032394.1 | GPR126       | 2.651 | Homo sapiens G protein-coupled receptor 126 (GPR126), transcript variant a2, mRNA.                                          |
| NM_198291.1    | SRC          | 2.649 | Homo sapiens v-src sarcoma (Schmidt-Ruppin A-2) viral oncogene homolog (avian) (SRC), transcript variant 2, mRNA.           |
| NM_139289.1    | AKAP4        | 2.647 | Homo sapiens A kinase (PRKA) anchor protein 4 (AKAP4), transcript variant 2, mRNA.                                          |
| NM_001001870.1 | C17orf91     | 2.646 | Homo sapiens chromosome 17 open reading frame 91 (C17orf91), transcript variant 2, mRNA.                                    |
| NM_178006.1    | STARD13      | 2.645 | Homo sapiens START domain containing 13 (STARD13), transcript variant alpha, mRNA.                                          |
| NM_016243.2    | CYB5R1       | 2.644 | Homo sapiens cytochrome b5 reductase 1 (CYB5R1), mRNA.                                                                      |
| NM_199168.2    | CXCL12       | 2.642 | Homo sapiens chemokine (C-X-C motif) ligand 12 (stromal cell-derived factor 1) (CXCL12), transcript variant 1, mRNA.        |
| NM_000714.4    | TSPO         | 2.641 | Homo sapiens translocator protein (18kDa) (TSPO), transcript variant PBR, mRNA.                                             |
| NM_000930.2    | PLAT         | 2.641 | Homo sapiens plasminogen activator, tissue (PLAT), transcript variant 1, mRNA.                                              |
| NM_001129.3    | AEBP1        | 2.641 | Homo sapiens AE binding protein 1 (AEBP1), mRNA.                                                                            |
| NM_020992.2    | PDLIM1       | 2.641 | Homo sapiens PDZ and LIM domain 1 (PDLIM1), mRNA.                                                                           |
| NM_001001787.1 | ATP1B1       | 2.639 | Homo sapiens ATPase, Na <sup>+</sup> /K <sup>+</sup> transporting, beta 1 polypeptide (ATP1B1), transcript variant 2, mRNA. |
| NM_006407.3    | ARL6IP5      | 2.636 | Homo sapiens ADP-ribosylation-like factor 6 interacting protein 5 (ARL6IP5), mRNA.                                          |
| NM_002506.2    | NGF          | 2.636 | Homo sapiens nerve growth factor (beta polypeptide) (NGF), mRNA.                                                            |
| NM_005946.2    | MT1A         | 2.635 | Homo sapiens metallothionein 1A (MT1A), mRNA.                                                                               |
| NM_005257.3    | GATA6        | 2.633 | Homo sapiens GATA binding protein 6 (GATA6), mRNA.                                                                          |
| NR_024618.1    | LOC100129550 | 2.627 | Homo sapiens hypothetical LOC100129550 (LOC100129550), non-coding RNA.                                                      |
| NM_003122.2    | SPINK1       | 2.623 | Homo sapiens serine peptidase inhibitor, Kazal type 1 (SPINK1), mRNA.                                                       |
| NM_001077593.1 | ADHFE1       | 2.623 | Homo sapiens alcohol dehydrogenase, iron containing, 1 (ADHFE1), transcript variant 1, mRNA.                                |
| NM_002166.4    | ID2          | 2.619 | Homo sapiens inhibitor of DNA binding 2, dominant negative helix-loop-helix protein (ID2), mRNA.                            |
| NM_003377.3    | VEGFB        | 2.613 | Homo sapiens vascular endothelial growth factor B (VEGFB), mRNA.                                                            |
| NM_006825.2    | CKAP4        | 2.612 | Homo sapiens cytoskeleton-associated protein 4 (CKAP4), mRNA.                                                               |
| NM_003816.2    | ADAM9        | 2.610 | Homo sapiens ADAM metallopeptidase domain 9 (meltrin gamma) (ADAM9), transcript variant 1, mRNA.                            |
| NM_000391.3    | TPP1         | 2.603 | Homo sapiens tripeptidyl peptidase I (TPP1), mRNA.                                                                          |
| NR_029622.1    | MIR205       | 2.600 | Homo sapiens microRNA 205 (MIR205), microRNA.                                                                               |
| NM_022486.3    | SUSD1        | 2.599 | Homo sapiens sushi domain containing 1 (SUSD1), mRNA.                                                                       |
| NM_014764.2    | DAZAP2       | 2.599 | Homo sapiens DAZ associated protein 2 (DAZAP2), mRNA.                                                                       |
| NM_013253.4    | DKK3         | 2.599 | Homo sapiens dickkopf homolog 3 (Xenopus laevis) (DKK3), transcript variant 2, mRNA.                                        |
| NM_005241.1    | EVI1         | 2.594 | Homo sapiens ecotropic viral integration site 1 (EVI1), mRNA.                                                               |
| NM_000302.2    | PLOD1        | 2.586 | Homo sapiens procollagen-lysine 1, 2-oxoglutarate 5-dioxygenase 1 (PLOD1), mRNA.                                            |
| NM_080760.3    | DACH1        | 2.585 | Homo sapiens dachshund homolog 1 (Drosophila) (DACH1), transcript variant 2, mRNA.                                          |
| NM_152680.1    | TMEM154      | 2.584 | Homo sapiens transmembrane protein 154 (TMEM154), mRNA.                                                                     |
| NM_002033.2    | FUT4         | 2.582 | Homo sapiens fucosyltransferase 4 (alpha (1,3) fucosyltransferase, myeloid-specific) (FUT4), mRNA.                          |



|                |          |       |                                                                                                                       |
|----------------|----------|-------|-----------------------------------------------------------------------------------------------------------------------|
| NM_032508.1    | TMEM185A | 2.579 | Homo sapiens transmembrane protein 185A (TMEM185A), mRNA.                                                             |
| NM_025185.3    | TANC2    | 2.576 | Homo sapiens tetratricopeptide repeat, ankyrin repeat and coiled-coil containing 2 (TANC2), mRNA.                     |
| NM_020998.2    | MST1     | 2.576 | Homo sapiens macrophage stimulating 1 (hepatocyte growth factor-like) (MST1), mRNA.                                   |
| NM_005067.5    | SIAH2    | 2.575 | Homo sapiens seven in absentia homolog 2 (Drosophila) (SIAH2), mRNA.                                                  |
| NM_024767.2    | DLC1     | 2.575 | Homo sapiens deleted in liver cancer 1 (DLC1), transcript variant 3, mRNA.                                            |
| NM_031305.2    | ARHGAP24 | 2.575 | Homo sapiens Rho GTPase activating protein 24 (ARHGAP24), transcript variant 2, mRNA.                                 |
| NM_018416.2    | FOXJ2    | 2.571 | Homo sapiens forkhead box J2 (FOXJ2), mRNA.                                                                           |
| NM_002555.3    | SLC22A18 | 2.567 | Homo sapiens solute carrier family 22 (organic cation transporter), member 18 (SLC22A18), transcript variant 1, mRNA. |
| NM_005980.2    | S100P    | 2.563 | Homo sapiens S100 calcium binding protein P (S100P), mRNA.                                                            |
| NM_000846.3    | GSTA2    | 2.563 | Homo sapiens glutathione S-transferase A2 (GSTA2), mRNA.                                                              |
| NM_001007593.1 | SMPD1    | 2.562 | Homo sapiens sphingomyelin phosphodiesterase 1, acid lysosomal (SMPD1), transcript variant ASM-2, mRNA.               |
| NM_024302.3    | MMP28    | 2.560 | Homo sapiens matrix metalloproteinase 28 (MMP28), transcript variant 1, mRNA.                                         |
| NM_004099.4    | STOM     | 2.555 | Homo sapiens stomatin (STOM), transcript variant 1, mRNA.                                                             |
| NM_014622.4    | VWA5A    | 2.546 | Homo sapiens von Willebrand factor A domain containing 5A (VWA5A), transcript variant 1, mRNA.                        |
| NM_182507.2    | KRT80    | 2.546 | Homo sapiens keratin 80 (KRT80), transcript variant 1, mRNA.                                                          |
| NM_001003845.1 | SP5      | 2.545 | Homo sapiens Sp5 transcription factor (SP5), mRNA.                                                                    |
| NM_015286.5    | SYNM     | 2.544 | Homo sapiens synemin, intermediate filament protein (SYNM), transcript variant B, mRNA.                               |
| NM_177925.2    | H2AFJ    | 2.542 | Homo sapiens H2A histone family, member J (H2AFJ), transcript variant 1, mRNA.                                        |
| NM_005308.2    | GRK5     | 2.540 | Homo sapiens G protein-coupled receptor kinase 5 (GRK5), mRNA.                                                        |
| NM_002659.2    | PLAUR    | 2.539 | Homo sapiens plasminogen activator, urokinase receptor (PLAUR), transcript variant 1, mRNA.                           |
| NM_018327.2    | SPTLC3   | 2.538 | Homo sapiens serine palmitoyltransferase, long chain base subunit 3 (SPTLC3), mRNA.                                   |
| NM_005178.2    | BCL3     | 2.536 | Homo sapiens B-cell CLL/lymphoma 3 (BCL3), mRNA.                                                                      |
| NM_021977.2    | SLC22A3  | 2.534 | Homo sapiens solute carrier family 22 (extraneuronal monoamine transporter), member 3 (SLC22A3), mRNA.                |
| XR_037953.1    | KRT18P17 | 2.533 | PREDICTED: Homo sapiens misc_RNA (KRT18P17), miscRNA.                                                                 |
| NM_007003.2    | PAGE4    | 2.531 | Homo sapiens P antigen family, member 4 (prostate associated) (PAGE4), mRNA.                                          |
| BX640888       |          | 2.529 | Homo sapiens mRNA; cDNA DKFZp686H20120 (from clone DKFZp686H20120)                                                    |
| NM_030634.2    | ZNF436   | 2.527 | Homo sapiens zinc finger protein 436 (ZNF436), transcript variant 2, mRNA.                                            |
| NM_130811.1    | SNAP25   | 2.526 | Homo sapiens synaptosomal-associated protein, 25kDa (SNAP25), transcript variant 2, mRNA.                             |
| NM_025135.2    | FHOD3    | 2.523 | Homo sapiens formin homology 2 domain containing 3 (FHOD3), mRNA.                                                     |
| NM_005775.3    | SORBS3   | 2.522 | Homo sapiens sorbin and SH3 domain containing 3 (SORBS3), transcript variant 1, mRNA.                                 |
| NM_018300.2    | ZNF83    | 2.521 | Homo sapiens zinc finger protein 83 (ZNF83), mRNA.                                                                    |
| NM_024843.2    | CYBRD1   | 2.519 | Homo sapiens cytochrome b reductase 1 (CYBRD1), mRNA.                                                                 |
| NM_152392.2    | AHSA2    | 2.516 | Homo sapiens AHA1, activator of heat shock 90kDa protein ATPase homolog 2 (yeast) (AHSA2), mRNA.                      |
| NM_002076.2    | GNS      | 2.515 | Homo sapiens glucosamine (N-acetyl)-6-sulfatase (Sanfilippo                                                           |

|                |           |       |                                                                                                                                       |
|----------------|-----------|-------|---------------------------------------------------------------------------------------------------------------------------------------|
|                |           |       | disease IID) (GNS), mRNA.                                                                                                             |
| NM_022769.3    | CRTC3     | 2.515 | Homo sapiens CREB regulated transcription coactivator 3 (CRTC3), transcript variant 1, mRNA.                                          |
| NM_021180.2    | GRHL3     | 2.515 | Homo sapiens grainyhead-like 3 (Drosophila) (GRHL3), transcript variant 1, mRNA.                                                      |
| NM_005780.1    | LHFP      | 2.515 | Homo sapiens lipoma HMGIC fusion partner (LHFP), mRNA.                                                                                |
| XM_001726946.1 | NBPF8     | 2.514 | PREDICTED: Homo sapiens neuroblastoma breakpoint family, member 8 (NBPF8), mRNA.                                                      |
| NM_006403.2    | NEDD9     | 2.514 | Homo sapiens neural precursor cell expressed, developmentally down-regulated 9 (NEDD9), transcript variant 1, mRNA.                   |
| NM_001014279.1 | C5orf39   | 2.513 | Homo sapiens chromosome 5 open reading frame 39 (C5orf39), mRNA.                                                                      |
| NM_005398.4    | PPP1R3C   | 2.513 | Homo sapiens protein phosphatase 1, regulatory (inhibitor) subunit 3C (PPP1R3C), mRNA.                                                |
| NM_012343.3    | NNT       | 2.512 | Homo sapiens nicotinamide nucleotide transhydrogenase (NNT), nuclear gene encoding mitochondrial protein, transcript variant 1, mRNA. |
| NM_001105079.1 | FBRS      | 2.512 | Homo sapiens fibrosin (FBRS), mRNA.                                                                                                   |
| NM_001031717.2 | CRELD1    | 2.512 | Homo sapiens cysteine-rich with EGF-like domains 1 (CRELD1), transcript variant 1, mRNA.                                              |
| NM_014476.1    | PDLIM3    | 2.510 | Homo sapiens PDZ and LIM domain 3 (PDLIM3), mRNA.                                                                                     |
| NM_006537.2    | USP3      | 2.510 | Homo sapiens ubiquitin specific peptidase 3 (USP3), mRNA.                                                                             |
| NM_001735.2    | C5        | 2.509 | Homo sapiens complement component 5 (C5), mRNA.                                                                                       |
| NM_020766.1    | PCDH19    | 2.508 | Homo sapiens protocadherin 19 (PCDH19), mRNA.                                                                                         |
| NM_001204.5    | BMPR2     | 2.507 | Homo sapiens bone morphogenetic protein receptor, type II (serine/threonine kinase) (BMPR2), mRNA.                                    |
| NM_153756.1    | FNDC5     | 2.504 | Homo sapiens fibronectin type III domain containing 5 (FNDC5), mRNA.                                                                  |
| NM_022763.3    | FNDC3B    | 2.504 | Homo sapiens fibronectin type III domain containing 3B (FNDC3B), transcript variant 1, mRNA.                                          |
| NM_001248.1    | ENTPD3    | 2.504 | Homo sapiens ectonucleoside triphosphate diphosphohydrolase 3 (ENTPD3), mRNA.                                                         |
| NM_177444.1    | PPFIBP1   | 2.501 | Homo sapiens PTPRF interacting protein, binding protein 1 (liprin beta 1) (PPFIBP1), transcript variant 2, mRNA.                      |
| NM_138972.2    | BACE1     | 2.501 | Homo sapiens beta-site APP-cleaving enzyme 1 (BACE1), transcript variant b, mRNA.                                                     |
| NM_004067.2    | CHN2      | 2.497 | Homo sapiens chimerin (chimaerin) 2 (CHN2), transcript variant 2, mRNA.                                                               |
| NM_006379.2    | SEMA3C    | 2.496 | Homo sapiens sema domain, immunoglobulin domain (Ig), short basic domain, secreted, (semaphorin) 3C (SEMA3C), mRNA.                   |
| NM_005651.1    | TDO2      | 2.495 | Homo sapiens tryptophan 2,3-dioxygenase (TDO2), mRNA.                                                                                 |
| NM_015482.1    | SLC22A23  | 2.494 | Homo sapiens solute carrier family 22, member 23 (SLC22A23), transcript variant 1, mRNA.                                              |
| NR_002797.1    | LOC255783 | 2.493 | Homo sapiens hypothetical protein LOC255783 (LOC255783), non-coding RNA.                                                              |
| NM_000047.1    | ARSE      | 2.492 | Homo sapiens arylsulfatase E (chondrodysplasia punctata 1) (ARSE), mRNA.                                                              |
| NM_018342.3    | TMEM144   | 2.491 | Homo sapiens transmembrane protein 144 (TMEM144), mRNA.                                                                               |
| NM_130435.2    | PTPRE     | 2.487 | Homo sapiens protein tyrosine phosphatase, receptor type, E (PTPRE), transcript variant 2, mRNA.                                      |
| NM_001095.2    | ACCN2     | 2.483 | Homo sapiens amiloride-sensitive cation channel 2, neuronal (ACCN2), transcript variant 2, mRNA.                                      |
| NM_031439.2    | SOX7      | 2.482 | Homo sapiens SRY (sex determining region Y)-box 7 (SOX7), mRNA.                                                                       |
| NM_002210.2    | ITGAV     | 2.482 | Homo sapiens integrin, alpha V (vitronectin receptor, alpha polypeptide, antigen CD51) (ITGAV), mRNA.                                 |
| NM_006763.2    | BTG2      | 2.481 | Homo sapiens BTG family, member 2 (BTG2), mRNA.                                                                                       |

|             |            |       |                                                                                                                                                 |
|-------------|------------|-------|-------------------------------------------------------------------------------------------------------------------------------------------------|
| NM_020338.2 | ZMIZ1      | 2.475 | Homo sapiens zinc finger, MIZ-type containing 1 (ZMIZ1), mRNA.                                                                                  |
| NM_000817.2 | GAD1       | 2.475 | Homo sapiens glutamate decarboxylase 1 (brain, 67kDa) (GAD1), transcript variant GAD67, mRNA.                                                   |
| NM_030799.6 | YIPF5      | 2.473 | Homo sapiens Yip1 domain family, member 5 (YIPF5), transcript variant 2, mRNA.                                                                  |
| NM_000156.4 | GAMT       | 2.471 | Homo sapiens guanidinoacetate N-methyltransferase (GAMT), transcript variant 1, mRNA.                                                           |
| NM_017709.3 | FAM46C     | 2.468 | Homo sapiens family with sequence similarity 46, member C (FAM46C), mRNA.                                                                       |
| NM_006092.1 | NOD1       | 2.466 | Homo sapiens nucleotide-binding oligomerization domain containing 1 (NOD1), mRNA.                                                               |
| NM_005895.3 | GOLGA3     | 2.465 | Homo sapiens golgi autoantigen, golgin subfamily a, 3 (GOLGA3), mRNA.                                                                           |
| NM_178422.4 | PAQR7      | 2.463 | Homo sapiens progesterin and adipoQ receptor family member VII (PAQR7), mRNA.                                                                   |
| NM_015150.1 | RFTN1      | 2.461 | Homo sapiens raftlin, lipid raft linker 1 (RFTN1), mRNA.                                                                                        |
| NM_018952.4 | HOXB6      | 2.460 | Homo sapiens homeobox B6 (HOXB6), mRNA.                                                                                                         |
| NM_144642.3 | SYNPR      | 2.460 | Homo sapiens synaptoporin (SYNPR), mRNA.                                                                                                        |
| NM_139125.2 | MASP1      | 2.459 | Homo sapiens mannan-binding lectin serine peptidase 1 (C4/C2 activating component of Ra-reactive factor) (MASP1), transcript variant 2, mRNA.   |
| NM_013401.2 | RAB3IL1    | 2.452 | Homo sapiens RAB3A interacting protein (rabin3)-like 1 (RAB3IL1), mRNA.                                                                         |
| NM_004354.1 | CCNG2      | 2.452 | Homo sapiens cyclin G2 (CCNG2), mRNA.                                                                                                           |
| NM_031458.1 | PARP9      | 2.452 | Homo sapiens poly (ADP-ribose) polymerase family, member 9 (PARP9), mRNA.                                                                       |
| NM_152996.1 | ST6GALNAC3 | 2.450 | Homo sapiens ST6 (alpha-N-acetyl-neuraminyl-2,3-beta-galactosyl-1, 3)-N-acetylgalactosaminide alpha-2,6-sialyltransferase 3 (ST6GALNAC3), mRNA. |
| NM_002198.1 | IRF1       | 2.449 | Homo sapiens interferon regulatory factor 1 (IRF1), mRNA.                                                                                       |
| NM_002100.3 | GYPB       | 2.446 | Homo sapiens glycophorin B (MNS blood group) (GYPB), mRNA.                                                                                      |
| NM_152330.2 | FRMD6      | 2.445 | Homo sapiens FERM domain containing 6 (FRMD6), mRNA.                                                                                            |
| NM_014909.3 | VASH1      | 2.444 | Homo sapiens vasohibin 1 (VASH1), mRNA.                                                                                                         |
| NM_012435.1 | SHC2       | 2.441 | Homo sapiens SHC (Src homology 2 domain containing) transforming protein 2 (SHC2), mRNA.                                                        |
| NM_003222.3 | TFAP2C     | 2.441 | Homo sapiens transcription factor AP-2 gamma (activating enhancer binding protein 2 gamma) (TFAP2C), mRNA.                                      |
| NM_001882.3 | CRHBP      | 2.440 | Homo sapiens corticotropin releasing hormone binding protein (CRHBP), mRNA.                                                                     |
| NM_138690.1 | GRIN3B     | 2.439 | Homo sapiens glutamate receptor, ionotropic, N-methyl-D-aspartate 3B (GRIN3B), mRNA.                                                            |
| NM_201554.1 | DGKA       | 2.436 | Homo sapiens diacylglycerol kinase, alpha 80kDa (DGKA), transcript variant 4, mRNA.                                                             |
| NM_005347.2 | HSPA5      | 2.435 | Homo sapiens heat shock 70kDa protein 5 (glucose-regulated protein, 78kDa) (HSPA5), mRNA.                                                       |
| NM_153367.2 | ZCCHC24    | 2.435 | Homo sapiens zinc finger, CCHC domain containing 24 (ZCCHC24), mRNA.                                                                            |
| NM_002413.3 | MGST2      | 2.433 | Homo sapiens microsomal glutathione S-transferase 2 (MGST2), mRNA.                                                                              |
| NM_018166.1 | FAM176B    | 2.433 | Homo sapiens family with sequence similarity 176, member B (FAM176B), mRNA.                                                                     |
| NM_000127.2 | EXT1       | 2.428 | Homo sapiens exostoses (multiple) 1 (EXT1), mRNA.                                                                                               |
| NM_016657.1 | KDEL3      | 2.425 | Homo sapiens KDEL (Lys-Asp-Glu-Leu) endoplasmic reticulum protein retention receptor 3 (KDEL3), transcript variant 2, mRNA.                     |
| NM_022572.2 | PNKD       | 2.422 | Homo sapiens paroxysmal nonkinesigenic dyskinesia (PNKD), transcript variant 2, mRNA.                                                           |

|                |           |       |                                                                                                                          |
|----------------|-----------|-------|--------------------------------------------------------------------------------------------------------------------------|
| NM_001002857.1 | ANXA2     | 2.420 | Homo sapiens annexin A2 (ANXA2), transcript variant 2, mRNA.                                                             |
| NM_001007189.1 | C5orf53   | 2.416 | Homo sapiens chromosome 5 open reading frame 53 (C5orf53), mRNA.                                                         |
| NM_032854.2    | CORO6     | 2.415 | Homo sapiens coronin 6 (CORO6), mRNA.                                                                                    |
| NM_170677.2    | MEIS2     | 2.414 | Homo sapiens Meis homeobox 2 (MEIS2), transcript variant a, mRNA.                                                        |
| NR_003041.1    | SNORD13   | 2.414 | Homo sapiens small nucleolar RNA, C/D box 13 (SNORD13), small nucleolar RNA.                                             |
| NM_001852.3    | COL9A2    | 2.413 | Homo sapiens collagen, type IX, alpha 2 (COL9A2), mRNA.                                                                  |
| NM_018649.2    | H2AFY2    | 2.407 | Homo sapiens H2A histone family, member Y2 (H2AFY2), mRNA.                                                               |
| NM_015383.1    | NBPF14    | 2.406 | Homo sapiens neuroblastoma breakpoint family, member 14 (NBPF14), mRNA.                                                  |
| NM_003887.2    | ASAP2     | 2.405 | Homo sapiens ArfGAP with SH3 domain, ankyrin repeat and PH domain 2 (ASAP2), transcript variant 1, mRNA.                 |
| NM_032961.1    | PCDH10    | 2.404 | Homo sapiens protocadherin 10 (PCDH10), transcript variant 1, mRNA.                                                      |
| XM_930677.1    | LOC642299 | 2.404 | PREDICTED: Homo sapiens hypothetical protein LOC642299 (LOC642299), mRNA.                                                |
| NM_004107.3    | FCGRT     | 2.403 | Homo sapiens Fc fragment of IgG, receptor, transporter, alpha (FCGRT), transcript variant 1, mRNA.                       |
| NM_001135095.1 | FNDC3B    | 2.403 | Homo sapiens fibronectin type III domain containing 3B (FNDC3B), transcript variant 2, mRNA.                             |
| NM_032017.1    | STK40     | 2.402 | Homo sapiens serine/threonine kinase 40 (STK40), mRNA.                                                                   |
| NM_000913.3    | OPRL1     | 2.401 | Homo sapiens opiate receptor-like 1 (OPRL1), transcript variant 2, mRNA.                                                 |
| NM_002676.1    | PMM1      | 2.398 | Homo sapiens phosphomannomutase 1 (PMM1), mRNA.                                                                          |
| NM_153234.3    | LIX1      | 2.395 | Homo sapiens Lix1 homolog (mouse) (LIX1), mRNA.                                                                          |
| NM_005953.2    | MT2A      | 2.394 | Homo sapiens metallothionein 2A (MT2A), mRNA.                                                                            |
| NM_001759.2    | CCND2     | 2.394 | Homo sapiens cyclin D2 (CCND2), mRNA.                                                                                    |
| NM_004512.3    | IL11RA    | 2.393 | Homo sapiens interleukin 11 receptor, alpha (IL11RA), transcript variant 1, mRNA.                                        |
| NM_198080.2    | MSRB3     | 2.392 | Homo sapiens methionine sulfoxide reductase B3 (MSRB3), transcript variant 1, mRNA.                                      |
| NM_183372.3    | LOC200030 | 2.390 | Homo sapiens neuroblastoma breakpoint family, member 11-like (LOC200030), mRNA.                                          |
| XM_374137.4    | LOC389328 | 2.387 | PREDICTED: Homo sapiens hypothetical LOC389328 (LOC389328), mRNA.                                                        |
| NM_018004.1    | TMEM45A   | 2.386 | Homo sapiens transmembrane protein 45A (TMEM45A), mRNA.                                                                  |
| NM_000690.2    | ALDH2     | 2.385 | Homo sapiens aldehyde dehydrogenase 2 family (mitochondrial) (ALDH2), nuclear gene encoding mitochondrial protein, mRNA. |
| NM_016246.2    | HSD17B14  | 2.384 | Homo sapiens hydroxysteroid (17-beta) dehydrogenase 14 (HSD17B14), mRNA.                                                 |
| NM_024815.3    | NUDT18    | 2.384 | Homo sapiens nudix (nucleoside diphosphate linked moiety X)-type motif 18 (NUDT18), mRNA.                                |
| NM_181533.3    | ABHD12B   | 2.383 | Homo sapiens abhydrolase domain containing 12B (ABHD12B), transcript variant 2, mRNA.                                    |
| NM_001406.3    | EFNB3     | 2.381 | Homo sapiens ephrin-B3 (EFNB3), mRNA.                                                                                    |
| NM_005419.2    | STAT2     | 2.380 | Homo sapiens signal transducer and activator of transcription 2, 113kDa (STAT2), mRNA.                                   |
| NM_138371.1    | FAM113B   | 2.378 | Homo sapiens family with sequence similarity 113, member B (FAM113B), mRNA.                                              |
| NM_013995.1    | LAMP2     | 2.376 | Homo sapiens lysosomal-associated membrane protein 2 (LAMP2), transcript variant LAMP2B, mRNA.                           |
| NM_003156.2    | STIM1     | 2.373 | Homo sapiens stromal interaction molecule 1 (STIM1), mRNA.                                                               |
| XM_001134449.1 | KBTBD9    | 2.372 | PREDICTED: Homo sapiens kelch repeat and BTB (POZ) domain containing 9 (KBTBD9), mRNA.                                   |
| XM_001719242.1 | LOC284297 | 2.369 | PREDICTED: Homo sapiens hypothetical LOC284297 (LOC284297),                                                              |

|                |           |       |                                                                                                                                                   |
|----------------|-----------|-------|---------------------------------------------------------------------------------------------------------------------------------------------------|
|                |           |       | mRNA.                                                                                                                                             |
| NM_014570.3    | ARFGAP3   | 2.369 | Homo sapiens ADP-ribosylation factor GTPase activating protein 3 (ARFGAP3), mRNA.                                                                 |
| NM_006343.2    | MERTK     | 2.367 | Homo sapiens c-mer proto-oncogene tyrosine kinase (MERTK), mRNA.                                                                                  |
| NM_177947.2    | ARMCX3    | 2.365 | Homo sapiens armadillo repeat containing, X-linked 3 (ARMCX3), transcript variant 2, mRNA.                                                        |
| NM_018286.2    | TMEM100   | 2.363 | Homo sapiens transmembrane protein 100 (TMEM100), transcript variant 2, mRNA.                                                                     |
| NM_001002857.1 | ANXA2     | 2.363 | Homo sapiens annexin A2 (ANXA2), transcript variant 2, mRNA.                                                                                      |
| NM_002310.3    | LIFR      | 2.361 | Homo sapiens leukemia inhibitory factor receptor alpha (LIFR), mRNA.                                                                              |
| NM_017594.3    | DIRAS2    | 2.355 | Homo sapiens DIRAS family, GTP-binding RAS-like 2 (DIRAS2), mRNA.                                                                                 |
| NM_031302.3    | GLT8D2    | 2.354 | Homo sapiens glycosyltransferase 8 domain containing 2 (GLT8D2), mRNA.                                                                            |
| NM_004454.1    | ETV5      | 2.353 | Homo sapiens ets variant gene 5 (ets-related molecule) (ETV5), mRNA.                                                                              |
| NM_024345.3    | DCAF10    | 2.353 | Homo sapiens DDB1 and CUL4 associated factor 10 (DCAF10), mRNA.                                                                                   |
| NM_030806.3    | C1orf21   | 2.352 | Homo sapiens chromosome 1 open reading frame 21 (C1orf21), mRNA.                                                                                  |
| NM_001018073.1 | PCK2      | 2.352 | Homo sapiens phosphoenolpyruvate carboxykinase 2 (mitochondrial) (PCK2), nuclear gene encoding mitochondrial protein, transcript variant 2, mRNA. |
| NM_015470.2    | RAB11FIP5 | 2.352 | Homo sapiens RAB11 family interacting protein 5 (class I) (RAB11FIP5), mRNA.                                                                      |
| NM_198595.2    | AFAP1     | 2.350 | Homo sapiens actin filament associated protein 1 (AFAP1), transcript variant 2, mRNA.                                                             |
| NM_000628.3    | IL10RB    | 2.350 | Homo sapiens interleukin 10 receptor, beta (IL10RB), mRNA.                                                                                        |
| NM_004200.2    | SYT7      | 2.350 | Homo sapiens synaptotagmin VII (SYT7), mRNA.                                                                                                      |
| NM_198845.2    | SIGLEC6   | 2.350 | Homo sapiens sialic acid binding Ig-like lectin 6 (SIGLEC6), transcript variant 2, mRNA.                                                          |
| NM_203417.1    | RCAN1     | 2.348 | Homo sapiens regulator of calcineurin 1 (RCAN1), transcript variant 2, mRNA.                                                                      |
| NM_002409.4    | MGAT3     | 2.348 | Homo sapiens mannosyl (beta-1,4-)-glycoprotein beta-1,4-N-acetylglucosaminyltransferase (MGAT3), transcript variant 1, mRNA.                      |
| NM_007021.2    | C10orf10  | 2.345 | Homo sapiens chromosome 10 open reading frame 10 (C10orf10), mRNA.                                                                                |
| NM_024569.3    | MPZL1     | 2.345 | Homo sapiens myelin protein zero-like 1 (MPZL1), transcript variant 2, mRNA.                                                                      |
| NM_006123.2    | IDS       | 2.344 | Homo sapiens iduronate 2-sulfatase (Hunter syndrome) (IDS), transcript variant 2, mRNA.                                                           |
| NM_017515.3    | SLC35F2   | 2.342 | Homo sapiens solute carrier family 35, member F2 (SLC35F2), mRNA.                                                                                 |
| XM_941789.2    | LOC647169 | 2.341 | PREDICTED: Homo sapiens similar to glutathione S-transferase alpha 3 (LOC647169), mRNA.                                                           |
| NM_080818.3    | OXGR1     | 2.341 | Homo sapiens oxoglutarate (alpha-ketoglutarate) receptor 1 (OXGR1), mRNA.                                                                         |
| NM_001014447.1 | CPZ       | 2.340 | Homo sapiens carboxypeptidase Z (CPZ), transcript variant 1, mRNA.                                                                                |
| XM_928128.1    | LOC643431 | 2.340 | PREDICTED: Homo sapiens similar to Keratin, type II cytoskeletal 8 (Cytokeratin-8) (CK-8) (Keraton-8) (K8) (LOC643431), mRNA.                     |
| NM_001362.2    | DIO3      | 2.338 | Homo sapiens deiodinase, iodothyronine, type III (DIO3), mRNA.                                                                                    |
| NM_032256.1    | TMEM117   | 2.337 | Homo sapiens transmembrane protein 117 (TMEM117), mRNA.                                                                                           |
| NM_002222.4    | ITPR1     | 2.336 | Homo sapiens inositol 1,4,5-triphosphate receptor, type 1                                                                                         |

|                |           |       |                                                                                                                                              |
|----------------|-----------|-------|----------------------------------------------------------------------------------------------------------------------------------------------|
|                |           |       | (ITPR1), transcript variant 2, mRNA.                                                                                                         |
| NM_173546.1    | KLHDC8B   | 2.336 | Homo sapiens kelch domain containing 8B (KLHDC8B), mRNA.                                                                                     |
| NM_080821.2    | C20orf108 | 2.334 | Homo sapiens chromosome 20 open reading frame 108 (C20orf108), mRNA.                                                                         |
| NM_001769.2    | CD9       | 2.332 | Homo sapiens CD9 molecule (CD9), mRNA.                                                                                                       |
| NM_006022.2    | TSC22D1   | 2.326 | Homo sapiens TSC22 domain family, member 1 (TSC22D1), transcript variant 2, mRNA.                                                            |
| NM_005748.3    | YAF2      | 2.326 | Homo sapiens YY1 associated factor 2 (YAF2), mRNA.                                                                                           |
| AK127526       |           | 2.325 | Homo sapiens cDNA FLJ45619 fis, clone BRTHA3027318                                                                                           |
| NM_002207.2    | ITGA9     | 2.324 | Homo sapiens integrin, alpha 9 (ITGA9), mRNA.                                                                                                |
| NM_002575.1    | SERPINB2  | 2.323 | Homo sapiens serpin peptidase inhibitor, clade B (ovalbumin), member 2 (SERPINB2), mRNA.                                                     |
| NM_001039703.1 | NBPF10    | 2.323 | #####<br>#####<br>#####<br>#####<br>#####                                                                                                    |
| NM_014734.2    | KIAA0247  | 2.323 | Homo sapiens KIAA0247 (KIAA0247), mRNA.                                                                                                      |
| NM_207443.1    | FLJ45244  | 2.322 | Homo sapiens FLJ45244 protein (FLJ45244), mRNA.                                                                                              |
| NM_000346.2    | SOX9      | 2.320 | Homo sapiens SRY (sex determining region Y)-box 9 (campomelic dysplasia, autosomal sex-reversal) (SOX9), mRNA.                               |
| NM_001375.2    | DNASE2    | 2.319 | Homo sapiens deoxyribonuclease II, lysosomal (DNASE2), mRNA.                                                                                 |
| NM_001040455.1 | SIDT2     | 2.313 | Homo sapiens SID1 transmembrane family, member 2 (SIDT2), mRNA.                                                                              |
| NM_003877.3    | SOCS2     | 2.311 | Homo sapiens suppressor of cytokine signaling 2 (SOCS2), mRNA.                                                                               |
| NM_019858.1    | GPR162    | 2.310 | Homo sapiens G protein-coupled receptor 162 (GPR162), transcript variant A-2, mRNA.                                                          |
| NM_017515.3    | SLC35F2   | 2.309 | Homo sapiens solute carrier family 35, member F2 (SLC35F2), mRNA.                                                                            |
| NM_001825.2    | CKMT2     | 2.309 | Homo sapiens creatine kinase, mitochondrial 2 (sarcomeric) (CKMT2), nuclear gene encoding mitochondrial protein, transcript variant 1, mRNA. |
| NM_021913.2    | AXL       | 2.309 | Homo sapiens AXL receptor tyrosine kinase (AXL), transcript variant 1, mRNA.                                                                 |
| NM_020899.2    | ZBTB4     | 2.309 | Homo sapiens zinc finger and BTB domain containing 4 (ZBTB4), mRNA.                                                                          |
| NM_006084.4    | IRF9      | 2.308 | Homo sapiens interferon regulatory factor 9 (IRF9), mRNA.                                                                                    |
| NM_001248.1    | ENTPD3    | 2.304 | Homo sapiens ectonucleoside triphosphate diphosphohydrolase 3 (ENTPD3), mRNA.                                                                |
| NM_021623.1    | PLEKHA2   | 2.302 | Homo sapiens pleckstrin homology domain containing, family A (phosphoinositide binding specific) member 2 (PLEKHA2), mRNA.                   |
| NM_030929.3    | KAZALD1   | 2.301 | Homo sapiens Kazal-type serine peptidase inhibitor domain 1 (KAZALD1), mRNA.                                                                 |
| NM_033254.2    | BOC       | 2.297 | Homo sapiens Boc homolog (mouse) (BOC), mRNA.                                                                                                |
| NM_172128.1    | CAMK2D    | 2.296 | Homo sapiens calcium/calmodulin-dependent protein kinase (CaM kinase) II delta (CAMK2D), transcript variant 2, mRNA.                         |
| NM_017514.2    | PLXNA3    | 2.293 | Homo sapiens plexin A3 (PLXNA3), mRNA.                                                                                                       |
| NM_004496.2    | FOXA1     | 2.292 | Homo sapiens forkhead box A1 (FOXA1), mRNA.                                                                                                  |
| NM_001005376.1 | PLAUR     | 2.291 | Homo sapiens plasminogen activator, urokinase receptor (PLAUR), transcript variant 2, mRNA.                                                  |
| NM_014452.3    | TNFRSF21  | 2.290 | Homo sapiens tumor necrosis factor receptor superfamily, member 21 (TNFRSF21), mRNA.                                                         |
| NM_004235.3    | KLF4      | 2.289 | Homo sapiens Kruppel-like factor 4 (gut) (KLF4), mRNA.                                                                                       |
| NM_001033873.1 | SMAGP     | 2.288 | Homo sapiens small cell adhesion glycoprotein (SMAGP), transcript variant 2, mRNA.                                                           |
| NM_000381.1    | MID1      | 2.287 | Homo sapiens midline 1 (Opitz/BBB syndrome) (MID1), transcript variant 1, mRNA.                                                              |

|                |         |       |                                                                                                                                                       |
|----------------|---------|-------|-------------------------------------------------------------------------------------------------------------------------------------------------------|
| NM_001080467.1 | MYO5B   | 2.287 | Homo sapiens myosin VB (MYO5B), mRNA.                                                                                                                 |
| NM_003070.3    | SMARCA2 | 2.286 | Homo sapiens SWI/SNF related, matrix associated, actin dependent regulator of chromatin, subfamily a, member 2 (SMARCA2), transcript variant 1, mRNA. |
| NM_003764.2    | STX11   | 2.282 | Homo sapiens syntaxin 11 (STX11), mRNA.                                                                                                               |
| NM_014556.2    | EVC     | 2.282 | Homo sapiens Ellis van Creveld syndrome (EVC), transcript variant 1, mRNA.                                                                            |
| NM_002979.3    | SCP2    | 2.278 | Homo sapiens sterol carrier protein 2 (SCP2), transcript variant 1, mRNA.                                                                             |
| NM_001017922.1 | ERMAP   | 2.276 | Homo sapiens erythroblast membrane-associated protein (Scianna blood group) (ERMAP), transcript variant 1, mRNA.                                      |
| NM_173354.3    | SIK1    | 2.276 | Homo sapiens salt-inducible kinase 1 (SIK1), mRNA.                                                                                                    |
| NM_032211.6    | LOXL4   | 2.274 | Homo sapiens lysyl oxidase-like 4 (LOXL4), mRNA.                                                                                                      |
| NM_005574.2    | LMO2    | 2.273 | Homo sapiens LIM domain only 2 (rhombotin-like 1) (LMO2), mRNA.                                                                                       |
| NM_153214.1    | FBLN7   | 2.271 | Homo sapiens fibulin 7 (FBLN7), mRNA.                                                                                                                 |
| NM_001003802.1 | SMARCD3 | 2.271 | Homo sapiens SWI/SNF related, matrix associated, actin dependent regulator of chromatin, subfamily d, member 3 (SMARCD3), transcript variant 1, mRNA. |
| NM_001792.2    | CDH2    | 2.269 | Homo sapiens cadherin 2, type 1, N-cadherin (neuronal) (CDH2), mRNA.                                                                                  |
| NM_005139.2    | ANXA3   | 2.269 | Homo sapiens annexin A3 (ANXA3), mRNA.                                                                                                                |
| NM_003887.1    | DDEF2   | 2.268 | Homo sapiens development and differentiation enhancing factor 2 (DDEF2), mRNA.                                                                        |
| NM_012453.2    | TBL2    | 2.267 | Homo sapiens transducin (beta)-like 2 (TBL2), mRNA.                                                                                                   |
| NM_177947.2    | ARMCX3  | 2.265 | Homo sapiens armadillo repeat containing, X-linked 3 (ARMCX3), transcript variant 2, mRNA.                                                            |
| NM_002293.2    | LAMC1   | 2.265 | Homo sapiens laminin, gamma 1 (formerly LAMB2) (LAMC1), mRNA.                                                                                         |
| NM_002292.3    | LAMB2   | 2.264 | Homo sapiens laminin, beta 2 (laminin S) (LAMB2), mRNA.                                                                                               |
| NM_030915.1    | LBH     | 2.263 | Homo sapiens limb bud and heart development homolog (mouse) (LBH), mRNA.                                                                              |
| NM_001006667.1 | TAC3    | 2.262 | Homo sapiens tachykinin 3 (neuromedin K, neurokinin beta) (TAC3), transcript variant 1, mRNA.                                                         |
| NM_024422.2    | DSC2    | 2.262 | Homo sapiens desmocollin 2 (DSC2), transcript variant Dsc2a, mRNA.                                                                                    |
| NM_198552.1    | FAM89A  | 2.262 | Homo sapiens family with sequence similarity 89, member A (FAM89A), mRNA.                                                                             |
| NM_001677.3    | ATP1B1  | 2.261 | Homo sapiens ATPase, Na <sup>+</sup> /K <sup>+</sup> transporting, beta 1 polypeptide (ATP1B1), transcript variant 1, mRNA.                           |
| NM_001024629.1 | NRP1    | 2.258 | Homo sapiens neuropilin 1 (NRP1), transcript variant 3, mRNA.                                                                                         |
| NM_033290.2    | MID1    | 2.256 | Homo sapiens midline 1 (Opitz/BBB syndrome) (MID1), transcript variant 3, mRNA.                                                                       |
| NM_018043.4    | TMEM16A | 2.256 | Homo sapiens transmembrane protein 16A (TMEM16A), mRNA.                                                                                               |
| NM_016240.2    | SCARA3  | 2.254 | Homo sapiens scavenger receptor class A, member 3 (SCARA3), transcript variant 1, mRNA.                                                               |
| NM_032354.2    | TMEM107 | 2.254 | Homo sapiens transmembrane protein 107 (TMEM107), transcript variant 1, mRNA.                                                                         |
| NM_006986.3    | MAGED1  | 2.252 | Homo sapiens melanoma antigen family D, 1 (MAGED1), transcript variant 2, mRNA.                                                                       |
| NM_032323.1    | TMEM79  | 2.251 | Homo sapiens transmembrane protein 79 (TMEM79), mRNA.                                                                                                 |
| NM_003887.2    | ASAP2   | 2.249 | Homo sapiens ArfGAP with SH3 domain, ankyrin repeat and PH domain 2 (ASAP2), transcript variant 1, mRNA.                                              |
| NM_005723.2    | TSPAN5  | 2.246 | Homo sapiens tetraspanin 5 (TSPAN5), mRNA.                                                                                                            |
| NM_002928.2    | RGS16   | 2.244 | Homo sapiens regulator of G-protein signalling 16 (RGS16), mRNA.                                                                                      |
| NM_005859.3    | PURA    | 2.242 | Homo sapiens purine-rich element binding protein A (PURA),                                                                                            |

|                |           |       |                                                                                                                                                             |
|----------------|-----------|-------|-------------------------------------------------------------------------------------------------------------------------------------------------------------|
|                |           |       | mRNA.                                                                                                                                                       |
| NM_031946.3    | CENTG3    | 2.241 | Homo sapiens centaurin, gamma 3 (CENTG3), mRNA.                                                                                                             |
| NM_003761.2    | VAMP8     | 2.239 | Homo sapiens vesicle-associated membrane protein 8 (endobrevin) (VAMP8), mRNA.                                                                              |
| NM_007029.2    | STMN2     | 2.238 | Homo sapiens stathmin-like 2 (STMN2), mRNA.                                                                                                                 |
| NM_138373.3    | MYADM     | 2.236 | Homo sapiens myeloid-associated differentiation marker (MYADM), transcript variant 2, mRNA.                                                                 |
| NM_015338.4    | ASXL1     | 2.230 | Homo sapiens additional sex combs like 1 (Drosophila) (ASXL1), mRNA.                                                                                        |
| NM_005514.5    | HLA-B     | 2.222 | Homo sapiens major histocompatibility complex, class I, B (HLA-B), mRNA.                                                                                    |
| NM_005949.2    | MT1F      | 2.216 | Homo sapiens metallothionein 1F (MT1F), mRNA.                                                                                                               |
| NM_006134.5    | TMEM50B   | 2.215 | Homo sapiens transmembrane protein 50B (TMEM50B), mRNA.                                                                                                     |
| XM_372780.3    | LOC391045 | 2.211 | PREDICTED: Homo sapiens similar to Solute carrier family 2, facilitated glucose transporter member 3 (Glucose transporter type 3, brain) (LOC391045), mRNA. |
| NM_001014431.1 | AKT1      | 2.209 | Homo sapiens v-akt murine thymoma viral oncogene homolog 1 (AKT1), transcript variant 3, mRNA.                                                              |
| NM_003998.2    | NFKB1     | 2.208 | Homo sapiens nuclear factor of kappa light polypeptide gene enhancer in B-cells 1 (NFKB1), mRNA.                                                            |
| NM_020815.1    | PCDH10    | 2.206 | Homo sapiens protocadherin 10 (PCDH10), transcript variant 2, mRNA.                                                                                         |
| NR_031742.1    | MIR1978   | 2.204 | Homo sapiens microRNA 1978 (MIR1978), microRNA.                                                                                                             |
| XR_036921.1    | LOC399965 | 2.204 | PREDICTED: Homo sapiens misc_RNA (LOC399965), miscRNA.                                                                                                      |
| XM_929667.1    | LOC653778 | 2.202 | PREDICTED: Homo sapiens similar to solute carrier family 25, member 37 (LOC653778), mRNA.                                                                   |
| NM_007364.2    | TMED3     | 2.198 | Homo sapiens transmembrane emp24 protein transport domain containing 3 (TMED3), mRNA.                                                                       |
| NR_002954.1    | SNORA12   | 2.195 | Homo sapiens small nucleolar RNA, H/ACA box 12 (SNORA12), small nucleolar RNA.                                                                              |
| NM_134445.2    | CD99L2    | 2.193 | Homo sapiens CD99 molecule-like 2 (CD99L2), transcript variant 3, mRNA.                                                                                     |
| NM_001005742.1 | GBA       | 2.190 | Homo sapiens glucosidase, beta; acid (includes glucosylceramidase) (GBA), transcript variant 3, mRNA.                                                       |
| NM_198148.1    | CPXM2     | 2.185 | Homo sapiens carboxypeptidase X (M14 family), member 2 (CPXM2), mRNA.                                                                                       |
| NM_020443.2    | NAV1      | 2.180 | Homo sapiens neuron navigator 1 (NAV1), mRNA.                                                                                                               |
| NM_014262.2    | LEPREL2   | 2.177 | Homo sapiens leprecan-like 2 (LEPREL2), mRNA.                                                                                                               |
| NM_016941.2    | DLL3      | 2.176 | Homo sapiens delta-like 3 (Drosophila) (DLL3), transcript variant 1, mRNA.                                                                                  |
| NM_133436.1    | ASNS      | 2.176 | Homo sapiens asparagine synthetase (ASNS), transcript variant 1, mRNA.                                                                                      |
| NM_001200.2    | BMP2      | 2.175 | Homo sapiens bone morphogenetic protein 2 (BMP2), mRNA.                                                                                                     |
| NM_024843.2    | CYBRD1    | 2.173 | Homo sapiens cytochrome b reductase 1 (CYBRD1), mRNA.                                                                                                       |
| NM_001006944.1 | RPS6KA4   | 2.168 | Homo sapiens ribosomal protein S6 kinase, 90kDa, polypeptide 4 (RPS6KA4), transcript variant 2, mRNA.                                                       |
| NM_003364.2    | UPP1      | 2.165 | Homo sapiens uridine phosphorylase 1 (UPP1), transcript variant 1, mRNA.                                                                                    |
| NM_002227.2    | JAK1      | 2.162 | Homo sapiens Janus kinase 1 (JAK1), mRNA.                                                                                                                   |
| NM_000153.2    | GALC      | 2.159 | Homo sapiens galactosylceramidase (GALC), transcript variant 1, mRNA.                                                                                       |
| NM_003254.2    | TIMP1     | 2.157 | Homo sapiens TIMP metalloproteinase inhibitor 1 (TIMP1), mRNA.                                                                                              |
| NM_152493.2    | ZNF362    | 2.155 | Homo sapiens zinc finger protein 362 (ZNF362), mRNA.                                                                                                        |
| NM_001040092.1 | ENPP2     | 2.148 | Homo sapiens ectonucleotide pyrophosphatase/phosphodiesterase 2 (ENPP2), transcript variant 2, mRNA.                                                        |
| NM_018660.2    | ZNF395    | 2.142 | Homo sapiens zinc finger protein 395 (ZNF395), mRNA.                                                                                                        |



|                |           |       |                                                                                                              |
|----------------|-----------|-------|--------------------------------------------------------------------------------------------------------------|
| NM_001024211.1 | S100A13   | 2.139 | Homo sapiens S100 calcium binding protein A13 (S100A13), transcript variant 3, mRNA.                         |
| NM_003641.3    | IFITM1    | 2.139 | Homo sapiens interferon induced transmembrane protein 1 (9-27) (IFITM1), mRNA.                               |
| NM_205767.1    | C19orf70  | 2.136 | Homo sapiens chromosome 19 open reading frame 70 (C19orf70), mRNA.                                           |
| NM_182972.2    | IRF2BP2   | 2.134 | Homo sapiens interferon regulatory factor 2 binding protein 2 (IRF2BP2), transcript variant 1, mRNA.         |
| BG698090       |           | 2.131 | 602659965F1 NCI_CGAP_Skn3 Homo sapiens cDNA clone IMAGE:4802969 5, mRNA sequence                             |
| NM_000022.2    | ADA       | 2.126 | Homo sapiens adenosine deaminase (ADA), mRNA.                                                                |
| NM_006810.2    | PDIA5     | 2.126 | Homo sapiens protein disulfide isomerase family A, member 5 (PDIA5), mRNA.                                   |
| NM_003842.3    | TNFRSF10B | 2.125 | Homo sapiens tumor necrosis factor receptor superfamily, member 10b (TNFRSF10B), transcript variant 1, mRNA. |
| NM_005952.2    | MT1X      | 2.119 | Homo sapiens metallothionein 1X (MT1X), mRNA.                                                                |
| NM_031219.2    | HDHD3     | 2.119 | Homo sapiens haloacid dehalogenase-like hydrolase domain containing 3 (HDHD3), mRNA.                         |
| NM_139343.1    | BIN1      | 2.118 | Homo sapiens bridging integrator 1 (BIN1), transcript variant 1, mRNA.                                       |
| NM_138370.2    | PKDCC     | 2.114 | Homo sapiens protein kinase domain containing, cytoplasmic homolog (mouse) (PKDCC), mRNA.                    |
| NM_144779.1    | FXYS5     | 2.114 | Homo sapiens FXYS domain containing ion transport regulator 5 (FXYS5), transcript variant 1, mRNA.           |
| NM_021913.2    | AXL       | 2.112 | Homo sapiens AXL receptor tyrosine kinase (AXL), transcript variant 1, mRNA.                                 |
| NM_016021.2    | UBE2J1    | 2.111 | Homo sapiens ubiquitin-conjugating enzyme E2, J1 (UBC6 homolog, yeast) (UBE2J1), mRNA.                       |
| AK091747       |           | 2.111 | Homo sapiens cDNA FLJ34428 fis, clone HLUNG2000761                                                           |
| NM_001020820.1 | MYADM     | 2.107 | Homo sapiens myeloid-associated differentiation marker (MYADM), transcript variant 4, mRNA.                  |
| NM_201222.1    | MAGED2    | 2.107 | Homo sapiens melanoma antigen family D, 2 (MAGED2), transcript variant 3, mRNA.                              |
| NM_014164.4    | FXYS5     | 2.106 | Homo sapiens FXYS domain containing ion transport regulator 5 (FXYS5), transcript variant 2, mRNA.           |
| NM_001024668.1 | LETMD1    | 2.100 | Homo sapiens LETM1 domain containing 1 (LETMD1), transcript variant 2, mRNA.                                 |
| NM_201630.1    | LRRN2     | 2.100 | Homo sapiens leucine rich repeat neuronal 2 (LRRN2), transcript variant 2, mRNA.                             |
| NM_012106.3    | ARL2BP    | 2.097 | Homo sapiens ADP-ribosylation factor-like 2 binding protein (ARL2BP), mRNA.                                  |
| NM_002294.1    | LAMP2     | 2.096 | Homo sapiens lysosomal-associated membrane protein 2 (LAMP2), transcript variant LAMP2A, mRNA.               |
| NM_032928.2    | TMEM141   | 2.091 | Homo sapiens transmembrane protein 141 (TMEM141), mRNA.                                                      |
| NM_000156.4    | GAMT      | 2.089 | Homo sapiens guanidinoacetate N-methyltransferase (GAMT), transcript variant 1, mRNA.                        |
| NM_001037537.1 | PHYH      | 2.086 | Homo sapiens phytanoyl-CoA 2-hydroxylase (PHYH), transcript variant 2, mRNA.                                 |
| NM_201414.1    | APP       | 2.085 | Homo sapiens amyloid beta (A4) precursor protein (APP), transcript variant 3, mRNA.                          |
| NM_005516.4    | HLA-E     | 2.085 | Homo sapiens major histocompatibility complex, class I, E (HLA-E), mRNA.                                     |
| NM_001023567.2 | GOLGA8B   | 2.085 | Homo sapiens golgi autoantigen, golgin subfamily a, 8B (GOLGA8B), mRNA.                                      |
| NM_001014432.1 | AKT1      | 2.075 | Homo sapiens v-akt murine thymoma viral oncogene homolog 1 (AKT1), transcript variant 2, mRNA.               |
| NM_001040437.1 | C6orf48   | 2.056 | Homo sapiens chromosome 6 open reading frame 48 (C6orf48),                                                   |

|                |           |        |                                                                                                                                                 |
|----------------|-----------|--------|-------------------------------------------------------------------------------------------------------------------------------------------------|
|                |           |        | transcript variant 1, mRNA.                                                                                                                     |
| XM_939368.1    | LOC654103 | 2.054  | PREDICTED: Homo sapiens similar to solute carrier family 25, member 37 (LOC654103), mRNA.                                                       |
| NM_005779.1    | LHFPL2    | 2.052  | Homo sapiens lipoma HMGIC fusion partner-like 2 (LHFPL2), mRNA.                                                                                 |
| NM_201414.1    | APP       | 2.050  | Homo sapiens amyloid beta (A4) precursor protein (APP), transcript variant 3, mRNA.                                                             |
| NM_033668.1    | ITGB1     | 2.049  | Homo sapiens integrin, beta 1 (fibronectin receptor, beta polypeptide, antigen CD29 includes MDF2, MSK12) (ITGB1), transcript variant 1D, mRNA. |
| NM_153682.2    | PIGP      | 2.040  | Homo sapiens phosphatidylinositol glycan anchor biosynthesis, class P (PIGP), transcript variant 2, mRNA.                                       |
| NM_000202.3    | IDS       | 2.037  | Homo sapiens iduronate 2-sulfatase (Hunter syndrome) (IDS), transcript variant 1, mRNA.                                                         |
| NM_181509.1    | MAP1LC3A  | 2.022  | Homo sapiens microtubule-associated protein 1 light chain 3 alpha (MAP1LC3A), transcript variant 2, mRNA.                                       |
| NM_001614.2    | ACTG1     | 2.018  | Homo sapiens actin, gamma 1 (ACTG1), mRNA.                                                                                                      |
| NM_001144.4    | AMFR      | 2.011  | Homo sapiens autocrine motility factor receptor (AMFR), mRNA.                                                                                   |
| NM_032102.2    | SFRS2B    | 2.011  | Homo sapiens splicing factor, arginine/serine-rich 2B (SFRS2B), mRNA.                                                                           |
| NM_006675.3    | TSPAN9    | 2.007  | Homo sapiens tetraspanin 9 (TSPAN9), mRNA.                                                                                                      |
|                |           |        |                                                                                                                                                 |
| NM_002775.3    | HTRA1     | 6.923  | Homo sapiens HtrA serine peptidase 1 (HTRA1), mRNA.                                                                                             |
| NM_017949.1    | CUEDC1    | 2.492  | Homo sapiens CUE domain containing 1 (CUEDC1), mRNA.                                                                                            |
| NM_019064.3    | SDK2      | 2.284  | Homo sapiens sidekick homolog 2 (chicken) (SDK2), mRNA.                                                                                         |
| NM_004083.4    | DDIT3     | 6.132  | Homo sapiens DNA-damage-inducible transcript 3 (DDIT3), mRNA.                                                                                   |
| NM_004415.2    | DSP       | 2.892  | Homo sapiens desmoplakin (DSP), transcript variant 1, mRNA.                                                                                     |
| NM_024913.3    | FLJ21986  | 13.684 | Homo sapiens hypothetical protein FLJ21986 (FLJ21986), mRNA.                                                                                    |
| NM_000963.1    | PTGS2     | 3.643  | Homo sapiens prostaglandin-endoperoxide synthase 2 (prostaglandin G/H synthase and cyclooxygenase) (PTGS2), mRNA.                               |
| NM_001031677.2 | RAB24     | 2.151  | Homo sapiens RAB24, member RAS oncogene family (RAB24), transcript variant 1, mRNA.                                                             |
| NM_005141.2    | FGB       | 12.141 | Homo sapiens fibrinogen beta chain (FGB), mRNA.                                                                                                 |
| NM_001175.4    | ARHGDIB   | 18.076 | Homo sapiens Rho GDP dissociation inhibitor (GDI) beta (ARHGDIB), mRNA.                                                                         |
| NM_000902.3    | MME       | 5.293  | Homo sapiens membrane metallo-endopeptidase (MME), transcript variant 1, mRNA.                                                                  |
| NM_001037633.1 | SIL1      | 3.181  | Homo sapiens SIL1 homolog, endoplasmic reticulum chaperone ( <i>S. cerevisiae</i> ) (SIL1), transcript variant 1, mRNA.                         |
| NM_001884.2    | HAPLN1    | 18.816 | Homo sapiens hyaluronan and proteoglycan link protein 1 (HAPLN1), mRNA.                                                                         |
| NM_022469.3    | GREM2     | 2.727  | Homo sapiens gremlin 2, cysteine knot superfamily, homolog ( <i>Xenopus laevis</i> ) (GREM2), mRNA.                                             |
| NM_001013251.1 | SLC3A2    | 2.236  | Homo sapiens solute carrier family 3 (activators of dibasic and neutral amino acid transport), member 2 (SLC3A2), transcript variant 6, mRNA.   |
| NM_016269.2    | LEF1      | 7.560  | Homo sapiens lymphoid enhancer-binding factor 1 (LEF1), mRNA.                                                                                   |
| XM_001128725.1 | UGT2B7    | 4.120  | PREDICTED: Homo sapiens UDP glucuronosyltransferase 2 family, polypeptide B7 (UGT2B7), mRNA.                                                    |
| NM_147189.2    | FAM110B   | 2.972  | Homo sapiens family with sequence similarity 110, member B (FAM110B), mRNA.                                                                     |
| NM_198951.1    | TGM2      | 5.299  | Homo sapiens transglutaminase 2 (C polypeptide, protein-glutamine-gamma-glutamyltransferase) (TGM2), transcript variant 2, mRNA.                |
| NM_000679.3    | ADRA1B    | 5.164  | Homo sapiens adrenergic, alpha-1B-, receptor (ADRA1B), mRNA.                                                                                    |

|                |          |        |                                                                                                                                                  |
|----------------|----------|--------|--------------------------------------------------------------------------------------------------------------------------------------------------|
| XM_001128419.1 | MGC16121 | 9.205  | PREDICTED: Homo sapiens hypothetical protein MGC16121 (MGC16121), mRNA.                                                                          |
| NM_006988.3    | ADAMTS1  | 3.913  | Homo sapiens ADAM metalloproteinase with thrombospondin type 1 motif, 1 (ADAMTS1), mRNA.                                                         |
| NM_002237.3    | KCNQ1    | 2.652  | Homo sapiens potassium voltage-gated channel, subfamily G, member 1 (KCNQ1), mRNA.                                                               |
| NM_138609.2    | H2AFY    | 7.076  | Homo sapiens H2A histone family, member Y (H2AFY), transcript variant 1, mRNA.                                                                   |
| NM_139346.1    | BIN1     | 2.430  | Homo sapiens bridging integrator 1 (BIN1), transcript variant 4, mRNA.                                                                           |
| NM_002653.3    | PITX1    | 57.922 | Homo sapiens paired-like homeodomain transcription factor 1 (PITX1), mRNA.                                                                       |
| NM_032823.3    | C9orf3   | 2.445  | Homo sapiens chromosome 9 open reading frame 3 (C9orf3), mRNA.                                                                                   |
| NM_001844.3    | COL2A1   | 2.546  | Homo sapiens collagen, type II, alpha 1 (primary osteoarthritis, spondyloepiphyseal dysplasia, congenital) (COL2A1), transcript variant 1, mRNA. |
| NM_002147.3    | HOXB5    | 12.260 | Homo sapiens homeobox B5 (HOXB5), mRNA.                                                                                                          |
| NM_001025356.1 | ANO6     | 2.753  | Homo sapiens anoctamin 6 (ANO6), mRNA.                                                                                                           |
| NM_018022.1    | TMEM51   | 3.316  | Homo sapiens transmembrane protein 51 (TMEM51), mRNA.                                                                                            |
| NM_016574.2    | DRD2     | 2.372  | Homo sapiens dopamine receptor D2 (DRD2), transcript variant 2, mRNA.                                                                            |
| NM_001977.3    | ENPEP    | 3.302  | Homo sapiens glutamyl aminopeptidase (aminopeptidase A) (ENPEP), mRNA.                                                                           |
| NM_003621.1    | PPFIBP2  | 2.602  | Homo sapiens PTPRF interacting protein, binding protein 2 (liprin beta 2) (PPFIBP2), mRNA.                                                       |
| NM_001847.2    | COL4A6   | 5.798  | Homo sapiens collagen, type IV, alpha 6 (COL4A6), transcript variant A, mRNA.                                                                    |
| NM_001003793.1 | RBMS3    | 2.458  | Homo sapiens RNA binding motif, single stranded interacting protein (RBMS3), transcript variant 1, mRNA.                                         |
| XM_001131480.1 | ALOX15   | 3.549  | PREDICTED: Homo sapiens arachidonate 15-lipoxygenase (ALOX15), mRNA.                                                                             |
| NM_198080.2    | MSRB3    | 4.699  | Homo sapiens methionine sulfoxide reductase B3 (MSRB3), transcript variant 1, mRNA.                                                              |
| NM_032832.4    | LRP11    | 3.719  | Homo sapiens low density lipoprotein receptor-related protein 11 (LRP11), mRNA.                                                                  |
| NM_014467.2    | SRPX2    | 5.944  | Homo sapiens sushi-repeat-containing protein, X-linked 2 (SRPX2), mRNA.                                                                          |
| NM_015347.3    | RIMBP2   | 3.960  | Homo sapiens RIMS binding protein 2 (RIMBP2), mRNA.                                                                                              |
| NM_000615.5    | NCAM1    | 2.322  | Homo sapiens neural cell adhesion molecule 1 (NCAM1), transcript variant 1, mRNA.                                                                |
| NM_022760.3    | FAM113A  | 2.994  | Homo sapiens family with sequence similarity 113, member A (FAM113A), mRNA.                                                                      |
| NM_014045.3    | LRP10    | 2.289  | Homo sapiens low density lipoprotein receptor-related protein 10 (LRP10), mRNA.                                                                  |
| NM_018242.2    | SLC47A1  | 4.173  | Homo sapiens solute carrier family 47, member 1 (SLC47A1), mRNA.                                                                                 |
| NM_174911.3    | FAM84B   | 3.028  | Homo sapiens family with sequence similarity 84, member B (FAM84B), mRNA.                                                                        |
| NM_001999.3    | FBN2     | 5.458  | Homo sapiens fibrillin 2 (FBN2), mRNA.                                                                                                           |
| NM_001616.3    | ACVR2A   | 2.211  | Homo sapiens activin A receptor, type IIA (ACVR2A), mRNA.                                                                                        |
| NM_144607.3    | CYB5D1   | 3.570  | Homo sapiens cytochrome b5 domain containing 1 (CYB5D1), mRNA.                                                                                   |
| NM_001265.2    | CDX2     | 7.423  | Homo sapiens caudal type homeobox 2 (CDX2), mRNA.                                                                                                |
| NM_000965.2    | RARB     | 4.076  | Homo sapiens retinoic acid receptor, beta (RARB), transcript variant 1, mRNA.                                                                    |
| NM_001002292.1 | GPR177   | 14.683 | Homo sapiens G protein-coupled receptor 177 (GPR177),                                                                                            |

|                |           |        |                                                                                                                                                   |
|----------------|-----------|--------|---------------------------------------------------------------------------------------------------------------------------------------------------|
|                |           |        | transcript variant 2, mRNA.                                                                                                                       |
| NM_003174.3    | SVIL      | 3.889  | Homo sapiens supervillin (SVIL), transcript variant 1, mRNA.                                                                                      |
| NM_003730.3    | RNASET2   | 2.179  | Homo sapiens ribonuclease T2 (RNASET2), mRNA.                                                                                                     |
| NM_018281.2    | ECHDC2    | 2.581  | Homo sapiens enoyl Coenzyme A hydratase domain containing 2 (ECHDC2), mRNA.                                                                       |
| NM_001613.1    | ACTA2     | 26.846 | Homo sapiens actin, alpha 2, smooth muscle, aorta (ACTA2), mRNA.                                                                                  |
| NM_004563.2    | PCK2      | 3.057  | Homo sapiens phosphoenolpyruvate carboxykinase 2 (mitochondrial) (PCK2), nuclear gene encoding mitochondrial protein, transcript variant 1, mRNA. |
| NM_000313.1    | PROS1     | 2.166  | Homo sapiens protein S (alpha) (PROS1), mRNA.                                                                                                     |
| XR_016703.1    | LOC644743 | 4.519  | PREDICTED: Homo sapiens hypothetical LOC644743 (LOC644743), mRNA.                                                                                 |
| NM_016613.4    | C4orf18   | 10.483 | Homo sapiens chromosome 4 open reading frame 18 (C4orf18), transcript variant 2, mRNA.                                                            |
| NM_006486.2    | FBLN1     | 4.390  | Homo sapiens fibulin 1 (FBLN1), transcript variant D, mRNA.                                                                                       |
| NM_001797.2    | CDH11     | 12.410 | Homo sapiens cadherin 11, type 2, OB-cadherin (osteoblast) (CDH11), mRNA.                                                                         |
| NM_003619.2    | PRSS12    | 4.532  | Homo sapiens protease, serine, 12 (neurotrypsin, motopsin) (PRSS12), mRNA.                                                                        |
| NM_001092.3    | ABR       | 2.250  | Homo sapiens active BCR-related gene (ABR), transcript variant 2, mRNA.                                                                           |
| NM_000474.3    | TWIST1    | 13.168 | Homo sapiens twist homolog 1 (Drosophila) (TWIST1), mRNA.                                                                                         |
| NM_017656.2    | ZNF562    | 2.865  | Homo sapiens zinc finger protein 562 (ZNF562), mRNA.                                                                                              |
| NM_001042678.1 | RHOC      | 2.860  | Homo sapiens ras homolog gene family, member C (RHOC), transcript variant 2, mRNA.                                                                |
| NM_006435.2    | IFITM2    | 2.437  | Homo sapiens interferon induced transmembrane protein 2 (1-8D) (IFITM2), mRNA.                                                                    |
| NM_000422.1    | KRT17     | 5.101  | Homo sapiens keratin 17 (KRT17), mRNA.                                                                                                            |
| NM_001759.2    | CCND2     | 2.697  | Homo sapiens cyclin D2 (CCND2), mRNA.                                                                                                             |
| NM_002194.2    | INPP1     | 2.335  | Homo sapiens inositol polyphosphate-1-phosphatase (INPP1), mRNA.                                                                                  |
| NM_018837.2    | SULF2     | 2.327  | Homo sapiens sulfatase 2 (SULF2), transcript variant 1, mRNA.                                                                                     |
| NM_002342.1    | LTBR      | 2.420  | Homo sapiens lymphotoxin beta receptor (TNFR superfamily, member 3) (LTBR), mRNA.                                                                 |
| NM_022748.10   | TNS3      | 2.437  | Homo sapiens tensin 3 (TNS3), mRNA.                                                                                                               |
| NM_145263.2    | SPATA18   | 3.530  | Homo sapiens spermatogenesis associated 18 homolog (rat) (SPATA18), mRNA.                                                                         |
| NM_052966.1    | C1orf24   | 4.139  | Homo sapiens chromosome 1 open reading frame 24 (C1orf24), transcript variant 2, mRNA.                                                            |
| NM_000756.1    | CRH       | 5.218  | Homo sapiens corticotropin releasing hormone (CRH), mRNA.                                                                                         |
| NM_016815.2    | GYPC      | 4.393  | Homo sapiens glycophorin C (Gerbich blood group) (GYPC), transcript variant 2, mRNA.                                                              |
| NM_178507.2    | OAF       | 12.847 | Homo sapiens OAF homolog (Drosophila) (OAF), mRNA.                                                                                                |
| NM_003387.3    | WASPIP    | 5.470  | Homo sapiens Wiskott-Aldrich syndrome protein interacting protein (WASPIP), mRNA.                                                                 |
| NM_014876.3    | JOSD1     | 2.075  | Homo sapiens Josephin domain containing 1 (JOSD1), mRNA.                                                                                          |
| NM_153449.2    | SLC2A14   | 2.242  | Homo sapiens solute carrier family 2 (facilitated glucose transporter), member 14 (SLC2A14), mRNA.                                                |
| NM_031944.1    | MIXL1     | 2.642  | Homo sapiens Mix1 homeobox-like 1 (Xenopus laevis) (MIXL1), mRNA.                                                                                 |
| NM_000943.4    | PPIC      | 5.807  | Homo sapiens peptidylprolyl isomerase C (cyclophilin C) (PPIC), mRNA.                                                                             |
| NM_033260.3    | FOXQ1     | 2.231  | Homo sapiens forkhead box Q1 (FOXQ1), mRNA.                                                                                                       |
| NM_138992.1    | BACE2     | 2.258  | Homo sapiens beta-site APP-cleaving enzyme 2 (BACE2), transcript variant b, mRNA.                                                                 |
| NM_015037.2    | KIAA0913  | 2.017  | Homo sapiens KIAA0913 (KIAA0913), mRNA.                                                                                                           |

|                |          |        |                                                                                                                                      |
|----------------|----------|--------|--------------------------------------------------------------------------------------------------------------------------------------|
| NM_004403.2    | DFNA5    | 2.612  | Homo sapiens deafness, autosomal dominant 5 (DFNA5), transcript variant 1, mRNA.                                                     |
| NM_002999.2    | SDC4     | 2.639  | Homo sapiens syndecan 4 (SDC4), mRNA.                                                                                                |
| NM_006079.3    | CITED2   | 2.052  | Homo sapiens Cbp/p300-interacting transactivator, with Glu/Asp-rich carboxy-terminal domain, 2 (CITED2), transcript variant 1, mRNA. |
| NM_002381.4    | MATN3    | 2.257  | Homo sapiens matrilin 3 (MATN3), mRNA.                                                                                               |
| NR_003578.1    | ZNF702P  | 2.395  | Homo sapiens zinc finger protein 702 (pseudogene) (ZNF702P), non-coding RNA.                                                         |
| NM_000240.2    | MAOA     | 2.205  | Homo sapiens monoamine oxidase A (MAOA), nuclear gene encoding mitochondrial protein, mRNA.                                          |
| NM_001030050.1 | KLK3     | 3.138  | Homo sapiens kallikrein-related peptidase 3 (KLK3), transcript variant 6, mRNA.                                                      |
| NM_000358.1    | TGFBI    | 36.094 | Homo sapiens transforming growth factor, beta-induced, 68kDa (TGFBI), mRNA.                                                          |
| NM_172373.2    | ELF1     | 3.100  | Homo sapiens E74-like factor 1 (ets domain transcription factor) (ELF1), mRNA.                                                       |
| NM_000384.2    | APOB     | 2.699  | Homo sapiens apolipoprotein B (including Ag(x) antigen) (APOB), mRNA.                                                                |
| NM_000364.2    | TNNT2    | 8.914  | Homo sapiens troponin T type 2 (cardiac) (TNNT2), transcript variant 1, mRNA.                                                        |
| NM_006329.2    | FBLN5    | 3.332  | Homo sapiens fibulin 5 (FBLN5), mRNA.                                                                                                |
| NM_022356.2    | LEPRE1   | 3.054  | Homo sapiens leucine proline-enriched proteoglycan (leprecan) 1 (LEPRE1), mRNA.                                                      |
| NM_004512.3    | IL11RA   | 3.729  | Homo sapiens interleukin 11 receptor, alpha (IL11RA), transcript variant 1, mRNA.                                                    |
| NM_001457.1    | FLNB     | 2.576  | Homo sapiens filamin B, beta (actin binding protein 278) (FLNB), mRNA.                                                               |
| NM_006371.3    | CRTAP    | 2.889  | Homo sapiens cartilage associated protein (CRTAP), mRNA.                                                                             |
| NM_018948.2    | ERRFI1   | 2.940  | Homo sapiens ERBB receptor feedback inhibitor 1 (ERRFI1), mRNA.                                                                      |
| NM_002203.3    | ITGA2    | 2.725  | Homo sapiens integrin, alpha 2 (CD49B, alpha 2 subunit of VLA-2 receptor) (ITGA2), mRNA.                                             |
| NM_080491.1    | GAB2     | 2.550  | Homo sapiens GRB2-associated binding protein 2 (GAB2), transcript variant 1, mRNA.                                                   |
| NM_015689.2    | DENND2A  | 3.121  | Homo sapiens DENN/MADD domain containing 2A (DENND2A), mRNA.                                                                         |
| NM_173465.2    | COL23A1  | 2.486  | Homo sapiens collagen, type XXIII, alpha 1 (COL23A1), mRNA.                                                                          |
| NM_001001794.2 | FAM116B  | 2.244  | Homo sapiens family with sequence similarity 116, member B (FAM116B), mRNA.                                                          |
| NM_012396.3    | PHLDA3   | 3.569  | Homo sapiens pleckstrin homology-like domain, family A, member 3 (PHLDA3), mRNA.                                                     |
| NM_003506.2    | FZD6     | 2.201  | Homo sapiens frizzled homolog 6 (Drosophila) (FZD6), mRNA.                                                                           |
| NM_152753.2    | SCUBE3   | 6.178  | Homo sapiens signal peptide, CUB domain, EGF-like 3 (SCUBE3), mRNA.                                                                  |
| NM_000231.1    | SGCG     | 2.811  | Homo sapiens sarcoglycan, gamma (35kDa dystrophin-associated glycoprotein) (SGCG), mRNA.                                             |
| NM_014061.3    | MAGEH1   | 2.419  | Homo sapiens melanoma antigen family H, 1 (MAGEH1), mRNA.                                                                            |
| NM_000807.1    | GABRA2   | 2.556  | Homo sapiens gamma-aminobutyric acid (GABA) A receptor, alpha 2 (GABRA2), mRNA.                                                      |
| NM_004281.3    | BAG3     | 2.743  | Homo sapiens BCL2-associated athanogene 3 (BAG3), mRNA.                                                                              |
| NM_014330.2    | PPP1R15A | 2.212  | Homo sapiens protein phosphatase 1, regulatory (inhibitor) subunit 15A (PPP1R15A), mRNA.                                             |
| NM_176796.1    | P2RY6    | 5.767  | Homo sapiens pyrimidinergic receptor P2Y, G-protein coupled, 6 (P2RY6), transcript variant 3, mRNA.                                  |
| NM_003638.1    | ITGA8    | 3.508  | Homo sapiens integrin, alpha 8 (ITGA8), mRNA.                                                                                        |
| NM_183376.1    | ARRDC4   | 2.885  | Homo sapiens arrestin domain containing 4 (ARRDC4), mRNA.                                                                            |

|                |            |        |                                                                                                                                                                          |
|----------------|------------|--------|--------------------------------------------------------------------------------------------------------------------------------------------------------------------------|
| NM_001002292.1 | GPR177     | 9.127  | Homo sapiens G protein-coupled receptor 177 (GPR177), transcript variant 2, mRNA.                                                                                        |
| NM_021073.2    | BMP5       | 6.799  | Homo sapiens bone morphogenetic protein 5 (BMP5), mRNA.                                                                                                                  |
| NM_006868.2    | RAB31      | 2.618  | Homo sapiens RAB31, member RAS oncogene family (RAB31), mRNA.                                                                                                            |
| NM_152550.2    | SH3RF2     | 3.598  | Homo sapiens SH3 domain containing ring finger 2 (SH3RF2), mRNA.                                                                                                         |
| NM_019058.2    | DDIT4      | 9.474  | Homo sapiens DNA-damage-inducible transcript 4 (DDIT4), mRNA.                                                                                                            |
| XM_926584.1    | LOC653110  | 6.731  | PREDICTED: Homo sapiens similar to annexin A8, transcript variant 1 (LOC653110), mRNA.                                                                                   |
| NM_152882.2    | PTK7       | 2.182  | Homo sapiens PTK7 protein tyrosine kinase 7 (PTK7), transcript variant PTK7-4, mRNA.                                                                                     |
| NM_006287.4    | TFPI       | 7.195  | Homo sapiens tissue factor pathway inhibitor (lipoprotein-associated coagulation inhibitor) (TFPI), transcript variant 1, mRNA.                                          |
| NM_002922.3    | RGS1       | 3.715  | Homo sapiens regulator of G-protein signaling 1 (RGS1), mRNA.                                                                                                            |
| NM_002658.2    | PLAU       | 4.669  | Homo sapiens plasminogen activator, urokinase (PLAU), mRNA.                                                                                                              |
| NM_020130.3    | C8orf4     | 17.318 | Homo sapiens chromosome 8 open reading frame 4 (C8orf4), mRNA.                                                                                                           |
| NM_023915.2    | GPR87      | 2.257  | Homo sapiens G protein-coupled receptor 87 (GPR87), mRNA.                                                                                                                |
| NM_021871.2    | FGA        | 4.206  | Homo sapiens fibrinogen alpha chain (FGA), transcript variant alpha, mRNA.                                                                                               |
| NM_002899.2    | RBP1       | 2.243  | Homo sapiens retinol binding protein 1, cellular (RBP1), mRNA.                                                                                                           |
| NM_003038.2    | SLC1A4     | 2.375  | Homo sapiens solute carrier family 1 (glutamate/neutral amino acid transporter), member 4 (SLC1A4), mRNA.                                                                |
| NM_003966.1    | SEMA5A     | 3.884  | Homo sapiens sema domain, seven thrombospondin repeats (type 1 and type 1-like), transmembrane domain (TM) and short cytoplasmic domain, (semaphorin) 5A (SEMA5A), mRNA. |
| NM_153000.3    | APCDD1     | 4.814  | Homo sapiens adenomatosis polyposis coli down-regulated 1 (APCDD1), mRNA.                                                                                                |
| NM_001040002.1 | MEOX1      | 2.285  | Homo sapiens mesenchyme homeobox 1 (MEOX1), transcript variant 3, mRNA.                                                                                                  |
| NM_018192.2    | LEPREL1    | 2.070  | Homo sapiens leprecan-like 1 (LEPREL1), mRNA.                                                                                                                            |
| NM_144778.2    | MBNL2      | 3.224  | Homo sapiens muscleblind-like 2 (Drosophila) (MBNL2), transcript variant 1, mRNA.                                                                                        |
| NM_001677.3    | ATP1B1     | 2.694  | Homo sapiens ATPase, Na <sup>+</sup> /K <sup>+</sup> transporting, beta 1 polypeptide (ATP1B1), transcript variant 1, mRNA.                                              |
| NM_015430.2    | PAMR1      | 5.812  | Homo sapiens peptidase domain containing associated with muscle regeneration 1 (PAMR1), transcript variant 1, mRNA.                                                      |
| NM_025216.2    | WNT10A     | 3.007  | Homo sapiens wingless-type MMTV integration site family, member 10A (WNT10A), mRNA.                                                                                      |
| NM_014059.2    | C13orf15   | 9.160  | Homo sapiens chromosome 13 open reading frame 15 (C13orf15), mRNA.                                                                                                       |
| NM_152369.2    | SLC44A3    | 2.775  | Homo sapiens solute carrier family 44, member 3 (SLC44A3), mRNA.                                                                                                         |
| NM_005159.4    | ACTC1      | 2.892  | Homo sapiens actin, alpha, cardiac muscle 1 (ACTC1), mRNA.                                                                                                               |
| NM_006456.1    | ST6GALNAC2 | 2.425  | Homo sapiens ST6 (alpha-N-acetyl-neuraminyl-2,3-beta-galactosyl-1, 3)-N-acetylgalactosaminide alpha-2,6-sialyltransferase 2 (ST6GALNAC2), mRNA.                          |
| NM_002291.1    | LAMB1      | 3.952  | Homo sapiens laminin, beta 1 (LAMB1), mRNA.                                                                                                                              |
| NM_001233.3    | CAV2       | 2.893  | Homo sapiens caveolin 2 (CAV2), transcript variant 1, mRNA.                                                                                                              |
| NM_006516.1    | SLC2A1     | 2.950  | Homo sapiens solute carrier family 2 (facilitated glucose transporter), member 1 (SLC2A1), mRNA.                                                                         |
| NM_022343.2    | GLIPR2     | 2.883  | Homo sapiens GLI pathogenesis-related 2 (GLIPR2), mRNA.                                                                                                                  |
| NM_198552.1    | FAM89A     | 12.036 | Homo sapiens family with sequence similarity 89, member A (FAM89A), mRNA.                                                                                                |

|                |          |        |                                                                                                                                              |
|----------------|----------|--------|----------------------------------------------------------------------------------------------------------------------------------------------|
| NM_003836.4    | DLK1     | 20.348 | Homo sapiens delta-like 1 homolog (Drosophila) (DLK1), mRNA.                                                                                 |
| NM_001845.4    | COL4A1   | 4.620  | Homo sapiens collagen, type IV, alpha 1 (COL4A1), mRNA.                                                                                      |
| NM_016938.2    | EFEMP2   | 3.898  | Homo sapiens EGF-containing fibulin-like extracellular matrix protein 2 (EFEMP2), mRNA.                                                      |
| NM_021170.2    | HES4     | 4.138  | Homo sapiens hairy and enhancer of split 4 (Drosophila) (HES4), mRNA.                                                                        |
| NM_001466.2    | FZD2     | 2.503  | Homo sapiens frizzled homolog 2 (Drosophila) (FZD2), mRNA.                                                                                   |
| NM_005562.1    | LAMC2    | 2.479  | Homo sapiens laminin, gamma 2 (LAMC2), transcript variant 1, mRNA.                                                                           |
| NM_032873.3    | STS-1    | 7.843  | Homo sapiens Cbl-interacting protein Sts-1 (STS-1), mRNA.                                                                                    |
| NM_001031694.1 | SCMH1    | 2.369  | Homo sapiens sex comb on midleg homolog 1 (Drosophila) (SCMH1), transcript variant 1, mRNA.                                                  |
| NM_182801.1    | EGFLAM   | 27.065 | Homo sapiens EGF-like, fibronectin type III and laminin G domains (EGFLAM), transcript variant 4, mRNA.                                      |
| NM_152240.1    | ZMAT3    | 2.905  | Homo sapiens zinc finger, matrin type 3 (ZMAT3), transcript variant 2, mRNA.                                                                 |
| NM_024015.3    | HOXB4    | 2.383  | Homo sapiens homeo box B4 (HOXB4), mRNA.                                                                                                     |
| NM_015149.3    | RGL1     | 3.901  | Homo sapiens ral guanine nucleotide dissociation stimulator-like 1 (RGL1), mRNA.                                                             |
| NM_004429.3    | EFNB1    | 4.428  | Homo sapiens ephrin-B1 (EFNB1), mRNA.                                                                                                        |
| NM_001198.2    | PRDM1    | 2.291  | Homo sapiens PR domain containing 1, with ZNF domain (PRDM1), transcript variant 1, mRNA.                                                    |
| NM_152321.1    | ERP27    | 25.526 | Homo sapiens endoplasmic reticulum protein 27 kDa (ERP27), mRNA.                                                                             |
| NM_021137.3    | TNFAIP1  | 2.682  | Homo sapiens tumor necrosis factor, alpha-induced protein 1 (endothelial) (TNFAIP1), mRNA.                                                   |
| NM_006216.2    | SERPINE2 | 3.273  | Homo sapiens serpin peptidase inhibitor, clade E (nexin, plasminogen activator inhibitor type 1), member 2 (SERPINE2), mRNA.                 |
| NM_001008844.1 | DSP      | 3.569  | Homo sapiens desmoplakin (DSP), transcript variant 2, mRNA.                                                                                  |
| NM_006455.2    | SC65     | 2.234  | Homo sapiens synaptonemal complex protein SC65 (SC65), mRNA.                                                                                 |
| NM_003068.3    | SNAI2    | 14.582 | Homo sapiens snail homolog 2 (Drosophila) (SNAI2), mRNA.                                                                                     |
| NM_000494.3    | COL17A1  | 7.738  | Homo sapiens collagen, type XVII, alpha 1 (COL17A1), mRNA.                                                                                   |
| NM_001004439.1 | ITGA11   | 3.316  | Homo sapiens integrin, alpha 11 (ITGA11), mRNA.                                                                                              |
| NM_014755.1    | SERTAD2  | 2.709  | Homo sapiens SERTA domain containing 2 (SERTAD2), mRNA.                                                                                      |
| NM_000582.2    | SPP1     | 2.758  | Homo sapiens secreted phosphoprotein 1 (SPP1), transcript variant 2, mRNA.                                                                   |
| NM_080430.2    | SELM     | 2.487  | Homo sapiens selenoprotein M (SELM), mRNA.                                                                                                   |
| NM_153705.4    | KDEL2    | 3.936  | Homo sapiens KDEL (Lys-Asp-Glu-Leu) containing 2 (KDEL2), mRNA.                                                                              |
| NM_003596.2    | TPST1    | 2.366  | Homo sapiens tyrosylprotein sulfotransferase 1 (TPST1), mRNA.                                                                                |
| NM_001421.2    | ELF4     | 6.136  | Homo sapiens E74-like factor 4 (ets domain transcription factor) (ELF4), mRNA.                                                               |
| NM_018890.2    | RAC1     | 3.098  | Homo sapiens ras-related C3 botulinum toxin substrate 1 (rho family, small GTP binding protein Rac1) (RAC1), transcript variant Rac1b, mRNA. |

**Supplementary table 6: Genes down regulated in Day 12 as compared to Day 20**

| Refseq_NM   | Gene Symbol | D20/D12.fc | DEFINITION                                                                                   |
|-------------|-------------|------------|----------------------------------------------------------------------------------------------|
| NM_002341.1 | LTB         | -6.002494  | Homo sapiens lymphotoxin beta (TNF superfamily, member 3) (LTB), transcript variant 1, mRNA. |

**Supplementary table 7: Genes up regulated in Day 20 as compared to Day 12**

| Refseq_NM   | GeneSymbol | D20/D12.fc | DEFINITION                                                                                              |
|-------------|------------|------------|---------------------------------------------------------------------------------------------------------|
| NM_003836.4 | DLK1       | 13.44694   | Homo sapiens delta-like 1 homolog (Drosophila) (DLK1), mRNA.                                            |
| NM_003836.4 | DLK1       | 12.544575  | Homo sapiens delta-like 1 homolog (Drosophila) (DLK1), mRNA.                                            |
| NM_000900.2 | MGP        | 12.288249  | Homo sapiens matrix Gla protein (MGP), mRNA.                                                            |
| NM_015507.2 | EGFL6      | 11.061904  | Homo sapiens EGF-like-domain, multiple 6 (EGFL6), mRNA.                                                 |
| NM_001855.3 | COL15A1    | 9.711415   | Homo sapiens collagen, type XV, alpha 1 (COL15A1), mRNA.                                                |
| NM_015507.2 | EGFL6      | 8.986263   | Homo sapiens EGF-like-domain, multiple 6 (EGFL6), mRNA.                                                 |
| NM_001048.3 | SST        | 7.557473   | Homo sapiens somatostatin (SST), mRNA.                                                                  |
| NM_001463.2 | FRZB       | 6.754676   | Homo sapiens frizzled-related protein (FRZB), mRNA.                                                     |
| NM_178565.3 | RSPO2      | 4.867798   | Homo sapiens R-spondin 2 homolog (Xenopus laevis) (RSPO2), mRNA.                                        |
| NM_005950.1 | MT1G       | 4.821604   | Homo sapiens metallothionein 1G (MT1G), mRNA.                                                           |
| NM_003613.2 | CILP       | 4.790009   | Homo sapiens cartilage intermediate layer protein, nucleotide pyrophosphohydrolase (CILP), mRNA.        |
| NM_004887.3 | CXCL14     | 4.749055   | Homo sapiens chemokine (C-X-C motif) ligand 14 (CXCL14), mRNA.                                          |
| NM_002404.1 | MFAP4      | 4.65037    | Homo sapiens microfibrillar-associated protein 4 (MFAP4), mRNA.                                         |
| NM_004503.3 | HOXC6      | 4.641027   | Homo sapiens homeobox C6 (HOXC6), transcript variant 1, mRNA.                                           |
| NM_022658.3 | HOXC8      | 4.57334    | Homo sapiens homeobox C8 (HOXC8), mRNA.                                                                 |
| NM_001854.3 | COL11A1    | 4.457517   | Homo sapiens collagen, type XI, alpha 1 (COL11A1), transcript variant A, mRNA.                          |
| NM_182801.1 | EGFLAM     | 4.015794   | Homo sapiens EGF-like, fibronectin type III and laminin G domains (EGFLAM), transcript variant 4, mRNA. |
| NM_133505.2 | DCN        | 3.41316    | Homo sapiens decorin (DCN), transcript variant C, mRNA.                                                 |
